# Supplementary material for: Geographic distribution of mammal diets
Source: Copernicus journal article supplement (doi:10.5194/we-24-71-2024), 2024-08-15
Supplement: Supplementary file 1 [file we-24-71-2024-supplement.zip]

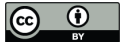

## *Supplement of*

# **Geographic distribution of mammal diets**

**María Losada et al.**

*Correspondence to:* Mar Sobral ([mar.sobral.bernal@usc.es](mailto:mar.sobral.bernal@usc.es))

- [we-24-71-2024-supplement-title-page.pdf](#)
- [Supplementary\\_Data\\_S1.xlsx](#)
- [Supplementary\\_Data\\_S2.xlsx](#)
- [Supplementary\\_Information.docx](#)

The copyright of individual parts of the supplement might differ from the article licence.
