# Supplementary material for: Geographic distribution of mammal diets
Source: Copernicus journal article supplement (doi:10.5194/we-24-71-2024), 2024-08-15
Supplement: Supplementary file 1 [file we-24-71-2024-supplement.zip]

## Sheet: datos_S2
ID	x	y	axis1	axis2	axis3	axis4	bio1	bio10	bio11	bio12	bio13	bio14	bio15	bio16	bio17	bio18	bio19	bio2	bio3	bio4	bio5	bio6	bio7	bio8	bio9
3106	3.7099e+06	8.15201e+06	0.28285	-0.0802954	0.129319	0.265499	-13.1279	2.99316	-27.0483	263.13	33.2582	11.9207	27.3968	91.1316	44.5473	87.2549	61.3411	5.94032	15.6497	1279.15	7.63247	-31.4508	39.0833	2.89549	-17.8468
3107	3.8099e+06	8.15201e+06	0.28285	-0.0802954	0.129319	0.265499	-14.0458	3.17196	-28.4756	261.037	32.7348	12.2559	26.765	89.6467	46.9477	86.5865	61.9248	6.23868	15.1064	1349.32	8.45252	-32.9214	41.3739	2.97674	-18.9565
3108	3.9099e+06	8.15201e+06	0.301722	-0.0950099	0.114471	0.243956	-14.6531	3.15408	-29.3184	263.364	34.1989	13.1026	29.2767	93.6897	48.2549	90.6361	57.5517	6.32192	14.8795	1383.52	8.68686	-33.7997	42.4865	2.84911	-21.0106
3109	4.0099e+06	8.15201e+06	0.293073	-0.0826835	0.133226	0.239652	-14.9197	3.39996	-29.992	265.161	36.083	13.2271	32.9852	98.7751	47.9687	94.293	51.8148	6.42992	14.6922	1418.62	9.10091	-34.6608	43.7617	2.90922	-25.0662
3110	4.1099e+06	8.15201e+06	0.273336	-0.0667364	0.149949	0.260764	-14.9812	3.6662	-30.4134	272.095	38.1647	12.5631	36.2937	104.505	46.3716	97.6784	48.511	6.48006	14.5271	1443.36	9.43394	-35.1602	44.5942	3.01901	-28.3685
3112	4.3099e+06	8.15201e+06	0.28285	-0.0802954	0.129319	0.265499	-15.0837	3.68916	-30.8951	281.019	39.2527	11.9676	37.4468	107.899	45.5603	99.9561	47.3411	6.24691	14.0123	1460.93	9.07666	-35.4447	44.5214	3.13682	-29.5758
3113	4.4099e+06	8.15201e+06	0.28285	-0.0802954	0.129319	0.265499	-15.1465	3.66258	-31.1644	264.296	37.9212	11.7869	38.7564	102.959	42.7512	97.624	43.7563	6.13831	13.7963	1474.11	8.69939	-35.7481	44.4475	3.28966	-30.8412
3114	4.5099e+06	8.15201e+06	0.28285	-0.0802954	0.129319	0.265499	-15.3943	3.51328	-31.427	246.253	37.2606	11.2259	42.1239	99.6727	38.2079	97.0169	38.9195	6.07761	13.6282	1479.97	8.51118	-36.0508	44.562	3.2396	-31.2553
3115	4.6099e+06	8.15201e+06	0.28285	-0.0802954	0.129319	0.265499	-15.678	3.0249	-31.4983	230.419	36.7574	10.1019	46.1623	97.4873	33.408	96.567	33.9413	5.98106	13.5606	1463.15	7.98871	-36.0926	44.0813	2.85262	-31.0308
3116	4.7099e+06	8.15201e+06	0.236906	-0.0971109	0.107519	0.224993	-15.6977	3.03256	-31.6916	209.916	34.292	8.78007	48.5243	90.953	28.7792	90.7715	30.4414	5.93657	13.3633	1473.53	7.9839	-36.4314	44.4153	2.97001	-30.3525
3117	4.8099e+06	8.15201e+06	0.236906	-0.0971109	0.107519	0.224993	-15.5413	3.18761	-31.6586	197.425	32.3033	8.1262	48.8836	86.1219	26.3726	86.1	28.8424	5.91332	13.2434	1478.36	8.15489	-36.4997	44.6546	3.18162	-29.7251
3463	3.3099e+06	8.05201e+06	0.226496	-0.0398317	0.0754626	0.261439	NA	NA	NA	NA	NA	NA	NA	NA	NA	NA	NA	NA	NA	NA	NA	NA	NA	NA	NA
3468	3.8099e+06	8.05201e+06	0.28285	-0.0802954	0.129319	0.265499	-12.6776	4.802	-27.4959	322.029	40.24	16.5309	25.1609	109.849	59.1053	104.869	74.3837	5.95626	14.0601	1368.74	10.2844	-32.1417	42.4262	4.70541	-17.531
3469	3.9099e+06	8.05201e+06	0.301722	-0.0950099	0.114471	0.243956	-12.9557	5.09749	-28.0795	312.107	37.6554	15.4184	23.1922	103.018	58.7599	98.1558	74.7912	6.31713	14.4459	1407.28	11.0676	-32.6822	43.7498	4.93457	-17.7505
3470	4.0099e+06	8.05201e+06	0.30952	-0.0959728	0.11929	0.222059	-13.3433	5.115	-28.6042	304.414	36.2967	15.0409	23.1624	100.201	58.3306	97.1025	70.9278	6.60103	14.7767	1430.41	11.4479	-33.2309	44.6788	4.86693	-18.6985
3471	4.1099e+06	8.05201e+06	0.24909	-0.097838	0.112502	0.206238	-13.6515	5.20922	-29.1352	293.21	36.2118	14.8976	25.6871	100.281	56.0888	97.6605	62.8099	6.84036	14.9738	1455.04	11.7441	-33.9377	45.6818	4.83975	-20.9701
3472	4.2099e+06	8.05201e+06	0.228978	-0.0858116	0.124711	0.221047	-13.8641	5.32373	-29.6125	288.2	37.2657	15.0595	29.2766	103.135	53.0365	99.8885	54.9274	7.06224	15.1703	1475.9	11.9306	-34.6163	46.5469	4.79344	-26.458
3473	4.3099e+06	8.05201e+06	0.228978	-0.0858116	0.124711	0.221047	-13.9082	5.67917	-30.2419	281.819	37.1415	14.0149	31.7649	102.767	48.6311	98.258	48.9957	7.26475	15.24	1512.11	12.2368	-35.4158	47.6526	5.03622	-29.6199
3474	4.4099e+06	8.05201e+06	0.228978	-0.0858116	0.124711	0.221047	-14.0409	5.85909	-30.8617	278.728	37.5355	12.7549	33.3727	102.867	45.721	97.0635	46.0429	7.29901	15.0737	1543.31	12.2713	-36.1108	48.3821	5.1641	-30.8046
3475	4.5099e+06	8.05201e+06	0.228978	-0.0858116	0.124711	0.221047	-14.2206	5.85154	-31.2289	275.641	37.8147	12.1444	34.2396	102.651	43.7652	96.5001	44.05	7.17041	14.7457	1559.68	12.1341	-36.4368	48.5709	5.14444	-31.2154
3476	4.6099e+06	8.05201e+06	0.213857	-0.083925	0.120385	0.242853	-14.3696	5.7589	-31.4279	265.736	37.078	11.6845	35.1783	100.282	41.2444	95.1851	41.3655	7.0209	14.4466	1566.41	11.9459	-36.594	48.5398	5.08663	-31.424
3477	4.7099e+06	8.05201e+06	0.24909	-0.097838	0.112502	0.206238	-14.463	5.63368	-31.637	245.837	35.3183	10.8583	37.2761	94.8949	37.1209	92.2068	37.507	6.90463	14.2274	1571.35	11.64	-36.8237	48.4637	5.07604	-31.6093
3478	4.8099e+06	8.05201e+06	0.222105	-0.0820747	0.114689	0.23522	-14.5062	5.35161	-31.705	228.027	34.0042	10.1913	40.3334	91.0306	33.4516	90.1942	33.9513	6.7588	14.0706	1563.83	11.0569	-36.8964	47.9533	5.0623	-31.595
3479	4.9099e+06	8.05201e+06	0.242223	-0.100867	0.0838706	0.205727	-14.6059	4.97043	-31.7264	209.985	32.4926	9.08815	43.6796	87.4477	29.6752	87.1782	30.1711	6.48889	13.8174	1550.15	10.3822	-36.904	47.2861	4.90009	-31.6061
3480	5.0099e+06	8.05201e+06	0.255037	-0.104499	0.106545	0.20884	-14.7379	4.90048	-31.84	204.084	31.9923	8.45803	45.7757	87.2838	27.6235	86.82	27.949	6.35128	14.0917	1551.15	10.3914	-37.0197	47.4111	4.89611	-31.746
3481	5.1099e+06	8.05201e+06	0.239994	-0.0927467	0.104776	0.22144	-14.9954	5.28048	-32.4987	195.193	31.1396	7.9708	47.4535	85.1822	25.6358	85.1507	25.6712	6.61584	13.5088	1588.39	11.391	-37.6556	49.0466	5.28	-32.4268
3482	5.2099e+06	8.05201e+06	0.239994	-0.0927467	0.104776	0.22144	-15.0755	5.63401	-32.9315	184.638	29.7406	7.41314	47.8533	80.5906	23.8587	80.5745	23.8594	6.97863	13.909	1617.36	12.2279	-37.9636	50.1915	5.62675	-32.9178
3483	5.3099e+06	8.05201e+06	0.239994	-0.0927467	0.104776	0.22144	-15.1251	5.43488	-33.1797	178.601	28.3045	7.12111	47.1847	76.3547	23.0782	75.9507	23.0788	7.10097	14.2133	1620.42	11.807	-38.1581	49.965	5.32657	-32.958
3484	5.4099e+06	8.05201e+06	0.239994	-0.0927467	0.104776	0.22144	NA	NA	NA	NA	NA	NA	NA	NA	NA	NA	NA	NA	NA	NA	NA	NA	NA	NA	NA
3485	5.5099e+06	8.05201e+06	0.245686	-0.104362	0.102162	0.224017	NA	NA	NA	NA	NA	NA	NA	NA	NA	NA	NA	NA	NA	NA	NA	NA	NA	NA	NA
3486	5.6099e+06	8.05201e+06	0.245686	-0.104362	0.102162	0.224017	-14.4461	4.69034	-31.6551	229.742	32.5362	10.8366	40.4866	92.4398	34.8112	87.8047	40.056	6.8471	15.2032	1536.45	10.4293	-36.1678	46.5971	4.07503	-30.3432
3487	5.7099e+06	8.05201e+06	0.249904	-0.114867	0.0897044	0.207121	-14.4206	4.87732	-31.5948	255.814	37.3507	11.8555	40.5107	102.415	39.0504	99.6991	47.5795	6.64403	14.2529	1542.42	10.498	-35.9747	46.4727	4.28865	-28.3659
3488	5.8099e+06	8.05201e+06	0.249904	-0.114867	0.0897044	0.207121	NA	NA	NA	NA	NA	NA	NA	NA	NA	NA	NA	NA	NA	NA	NA	NA	NA	NA	NA
3489	5.9099e+06	8.05201e+06	0.249904	-0.114867	0.0897044	0.207121	NA	NA	NA	NA	NA	NA	NA	NA	NA	NA	NA	NA	NA	NA	NA	NA	NA	NA	NA
3490	6.0099e+06	8.05201e+06	0.249904	-0.114867	0.0897044	0.207121	NA	NA	NA	NA	NA	NA	NA	NA	NA	NA	NA	NA	NA	NA	NA	NA	NA	NA	NA
3495	6.5099e+06	8.05201e+06	0.116818	-0.0881037	0.110836	0.222399	NA	NA	NA	NA	NA	NA	NA	NA	NA	NA	NA	NA	NA	NA	NA	NA	NA	NA	NA
3745	-4.5901e+06	7.95201e+06	0.18399	-0.0739215	0.0910166	0.245654	-16.151	3.62583	-33.2519	130.552	26.2234	3.15697	60.4852	64.4329	11.9037	54.1287	14.7278	6.53791	13.747	1537.58	9.99115	-37.965	47.9562	2.57456	-32.7485
3746	-4.4901e+06	7.95201e+06	0.18399	-0.0739215	0.0910166	0.245654	-15.9339	3.21386	-32.6396	142.374	27.9274	3.4606	58.445	68.5279	13.6731	57.3032	16.3405	6.43552	14.4856	1493.13	9.31053	-37.2643	46.5748	2.1438	-32.1368
3824	3.3099e+06	7.95201e+06	0.226496	-0.0398317	0.0754626	0.261439	-10.4157	4.86698	-24.2973	240.409	34.7268	14.1633	30.1256	86.4124	43.9207	84.8522	46.4566	6.65757	17.1327	1205.43	8.93222	-29.9326	38.8648	1.41852	-21.5841
3825	3.4099e+06	7.95201e+06	0.283058	-0.0828811	0.111083	0.269336	-10.7183	4.91501	-24.7605	246.78	36.6652	14.5602	31.5812	90.1021	44.8179	88.6631	47.11	6.58724	16.7994	1234.97	8.9841	-30.2272	39.2113	1.36534	-21.9222
3826	3.5099e+06	7.95201e+06	0.283058	-0.0828811	0.111083	0.269336	NA	NA	NA	NA	NA	NA	NA	NA	NA	NA	NA	NA	NA	NA	NA	NA	NA	NA	NA
3831	4.0099e+06	7.95201e+06	0.214047	-0.0862756	0.103807	0.246341	-11.9531	6.9022	-27.9184	355.466	44.2507	18.5743	24.1568	117.45	63.8747	111.555	82.4481	6.44383	13.946	1467.32	13.4231	-32.8019	46.225	5.84538	-16.9369
3832	4.1099e+06	7.95201e+06	0.197293	-0.0994368	0.106684	0.192678	-12.2905	6.74782	-28.2074	353.588	43.1334	18.5968	22.8007	115.05	64.9836	110.575	81.852	6.74555	14.4782	1474.55	13.5726	-33.0251	46.5977	5.91901	-17.2782
3833	4.2099e+06	7.95201e+06	0.197293	-0.0994368	0.106684	0.192678	-12.6282	6.74151	-28.6529	343.193	41.7085	18.4296	23.4939	113.428	63.8422	109.229	76.7496	6.99811	14.7514	1493.71	13.8779	-33.5609	47.4388	6.08077	-18.3548
3834	4.3099e+06	7.95201e+06	0.183023	-0.0664498	0.0942679	0.184143	-12.8539	6.92727	-29.1311	330.338	40.8891	18.2881	26.4849	113.437	60.7858	109.928	68.0216	7.3579	15.1352	1518.94	14.301	-34.3101	48.6111	6.38734	-21.8174
3835	4.4099e+06	7.95201e+06	0.183023	-0.0664498	0.0942679	0.184143	-12.8943	7.21708	-29.5463	319.819	41.1572	16.8763	30.7231	114.752	55.8946	112.03	59.2126	7.79166	15.6935	1542.36	14.6495	-34.9966	49.6462	6.5692	-27.0033
3836	4.5099e+06	7.95201e+06	0.183023	-0.0664498	0.0942679	0.184143	-12.9384	7.44723	-30.0478	309.197	41.4927	14.7558	34.5319	115.402	50.1985	112.263	51.9422	8.08096	16.006	1567.81	14.7975	-35.6832	50.4807	6.70354	-29.0722
3837	4.6099e+06	7.95201e+06	0.236867	-0.0756143	0.0626164	0.183572	-13.1445	7.59949	-30.8214	294.442	41.4449	13.2173	36.8075	113.143	45.8065	108.512	46.8117	8.16235	15.8732	1603.11	14.8883	-36.5133	51.4016	6.71522	-30.2853
3838	4.7099e+06	7.95201e+06	0.253122	-0.0892925	0.0673143	0.172656	-13.3851	7.74081	-31.5187	279.442	40.639	12.069	38.3941	109.625	42.2983	104.18	42.7438	8.11458	15.5371	1637.19	15.0049	-37.1884	52.1934	6.76146	-31.0884
3839	4.8099e+06	7.95201e+06	0.231987	-0.0846591	0.0543018	0.186579	-13.4919	8.01145	-31.9607	264.272	39.4753	11.0911	40.6984	106.07	38.5757	101.475	39.0648	8.06463	15.2243	1666.17	15.2931	-37.6255	52.9185	6.94282	-31.2238
3840	4.9099e+06	7.95201e+06	0.231987	-0.0846591	0.0543018	0.186579	-13.5717	7.9172	-32.1573	246.988	38.3003	10.1401	43.84	102.126	34.5997	99.4719	35.3817	7.93656	15.0161	1671.3	14.9254	-37.8512	52.7766	7.00149	-31.2456
3841	5.0099e+06	7.95201e+06	0.208214	-0.0934592	0.0580281	0.167284	-13.9184	7.03325	-32.0121	243.65	38.4914	9.51682	46.7845	103.433	32.3419	102.73	32.7971	7.54244	14.6971	1634.27	13.571	-37.6497	51.2207	6.61299	-31.3881
3842	5.1099e+06	7.95201e+06	0.174	-0.0947973	0.0566791	0.15974	-14.3276	6.30628	-32.2208	240.639	38.069	9.28253	48.2853	103.999	30.9712	103.981	31.0546	7.15353	14.1933	1616.66	12.5788	-37.7614	50.3402	6.2905	-31.9404
3843	5.2099e+06	7.95201e+06	0.184739	-0.0957717	0.066464	0.162665	-14.5012	6.42302	-32.688	228.728	36.6309	8.62977	49.7622	100.831	28.7582	100.831	28.8512	7.11011	13.9177	1637.69	12.9122	-38.1559	51.0681	6.42291	-32.3268
3844	5.3099e+06	7.95201e+06	0.219518	-0.0944848	0.0683281	0.170364	-14.6519	6.85841	-33.34	214.86	34.8312	8.01013	50.5407	95.5356	26.3793	95.5283	26.5852	7.37904	14.0326	1678.23	13.8512	-38.7309	52.5821	6.85571	-32.851
3845	5.4099e+06	7.95201e+06	0.215566	-0.111938	0.0836701	0.184882	-14.7961	7.11409	-33.9447	203.425	33.0223	7.80698	50.0751	89.7087	24.9744	89.5413	25.2319	7.722	14.363	1712.54	14.4585	-39.2912	53.7497	7.05892	-33.4171
3846	5.5099e+06	7.95201e+06	0.215566	-0.111938	0.0836701	0.184882	-14.8986	7.08796	-34.4147	197.293	31.1426	8.05107	48.0436	84.8166	25.2391	83.6719	25.6859	7.89105	14.5572	1730.79	14.4278	-39.7313	54.1592	6.79431	-33.8337
3847	5.6099e+06	7.95201e+06	0.215566	-0.111938	0.0836701	0.184882	-14.8245	6.96099	-34.4053	199.8	29.7769	8.60829	45.0651	83.0578	27.7139	79.9644	29.2501	7.88748	14.651	1726.05	14.1963	-39.6181	53.8144	6.24844	-33.4299
3848	5.7099e+06	7.95201e+06	0.22952	-0.120824	0.0862709	0.176195	-14.7482	6.80772	-34.1246	216.605	30.8983	9.66534	43.1643	88.0147	31.2238	83.685	34.6574	7.86604	14.7778	1709.66	13.9941	-39.2283	53.2224	5.71275	-32.3084
3849	5.8099e+06	7.95201e+06	0.271059	-0.128836	0.0795232	0.172894	-14.5488	6.81862	-33.6487	242.838	34.9584	10.5138	43.166	98.4526	34.6102	94.1066	40.9151	7.7936	14.7966	1691.34	13.86	-38.7083	52.5683	5.5557	-30.2374
3850	5.9099e+06	7.95201e+06	0.271059	-0.128836	0.0795232	0.172894	-14.1767	6.80455	-32.7772	271.071	40.3506	11.0127	44.3502	110.912	37.2229	107.556	48.0829	7.48567	14.5497	1656.53	13.5198	-37.7203	51.2401	5.61294	-27.0527
3851	6.0099e+06	7.95201e+06	0.271059	-0.128836	0.0795232	0.172894	-13.9155	6.62942	-31.8894	298.294	45.4841	11.7743	44.9639	122.138	40.3116	120.354	56.271	7.17016	14.3604	1616.1	13.1124	-36.7115	49.8238	5.65793	-25.8199
3852	6.1099e+06	7.95201e+06	0.28936	-0.116309	0.0856261	0.164354	-13.8193	6.46351	-31.521	314.439	48.8277	12.3453	45.4482	128.913	42.0903	128.068	64.0418	7.17244	14.5825	1597.71	12.7751	-36.4663	49.2414	5.78644	-24.0615
3853	6.2099e+06	7.95201e+06	0.280109	-0.124087	0.109494	0.18784	NA	NA	NA	NA	NA	NA	NA	NA	NA	NA	NA	NA	NA	NA	NA	NA	NA	NA	NA
3854	6.3099e+06	7.95201e+06	0.0602484	-0.0634208	0.106238	0.255846	NA	NA	NA	NA	NA	NA	NA	NA	NA	NA	NA	NA	NA	NA	NA	NA	NA	NA	NA
3855	6.4099e+06	7.95201e+06	0.117607	-0.087252	0.0875387	0.225537	NA	NA	NA	NA	NA	NA	NA	NA	NA	NA	NA	NA	NA	NA	NA	NA	NA	NA	NA
3856	6.5099e+06	7.95201e+06	0.160773	-0.106227	0.0937955	0.199591	NA	NA	NA	NA	NA	NA	NA	NA	NA	NA	NA	NA	NA	NA	NA	NA	NA	NA	NA
3857	6.6099e+06	7.95201e+06	0.160773	-0.106227	0.0937955	0.199591	-13.7128	5.00033	-30.9282	174.311	33.67	5.83292	65.968	88.0678	18.7369	84.5656	19.7738	6.78173	16.6403	1518.51	10.3294	-35.1329	45.4623	4.39682	-29.5274
3858	6.7099e+06	7.95201e+06	0.183658	-0.121543	0.0788369	0.178048	-14.1867	4.99892	-31.4651	170.754	32.4379	5.93177	64.2173	84.7801	18.5298	82.4872	19.0037	6.67301	15.1656	1539.81	10.2614	-35.6436	45.905	4.21253	-30.576
3859	6.8099e+06	7.95201e+06	0.183658	-0.121543	0.0788369	0.178048	-14.4836	5.09054	-32.2737	174.816	31.6006	6.45723	59.4701	82.7154	20.2883	81.916	21.1036	6.77354	14.4615	1576.38	10.324	-36.474	46.798	4.41884	-31.0357
3860	6.9099e+06	7.95201e+06	0.198509	-0.129505	0.0815493	0.170138	-14.4467	5.20459	-32.3094	182.768	31.3526	7.08178	54.5767	82.7452	22.6104	82.4771	24.2719	6.78093	14.4063	1582.67	10.5185	-36.5274	47.0458	4.88229	-29.9158
3861	7.0099e+06	7.95201e+06	0.198509	-0.129505	0.0815493	0.170138	-14.6319	5.15899	-32.3344	190.35	31.2569	7.81941	50.1563	83.6071	25.2499	83.546	27.2966	6.812	14.3806	1585.66	10.7427	-36.625	47.3676	5.07784	-29.5222
3862	7.1099e+06	7.95201e+06	0.148713	-0.102809	0.0724547	0.196661	NA	NA	NA	NA	NA	NA	NA	NA	NA	NA	NA	NA	NA	NA	NA	NA	NA	NA	NA
3863	7.2099e+06	7.95201e+06	0.148713	-0.102809	0.0724547	0.196661	NA	NA	NA	NA	NA	NA	NA	NA	NA	NA	NA	NA	NA	NA	NA	NA	NA	NA	NA
3864	7.3099e+06	7.95201e+06	0.0601401	-0.0697997	0.104895	0.258279	NA	NA	NA	NA	NA	NA	NA	NA	NA	NA	NA	NA	NA	NA	NA	NA	NA	NA	NA
4070	-8.1901e+06	7.85201e+06	0.0424338	-0.0448021	0.0841924	0.261116	NA	NA	NA	NA	NA	NA	NA	NA	NA	NA	NA	NA	NA	NA	NA	NA	NA	NA	NA
4071	-8.0901e+06	7.85201e+06	0.0878494	-0.0698167	0.0553856	0.226204	NA	NA	NA	NA	NA	NA	NA	NA	NA	NA	NA	NA	NA	NA	NA	NA	NA	NA	NA
4072	-7.9901e+06	7.85201e+06	0.109363	-0.0542146	0.0418482	0.209085	NA	NA	NA	NA	NA	NA	NA	NA	NA	NA	NA	NA	NA	NA	NA	NA	NA	NA	NA
4073	-7.8901e+06	7.85201e+06	0.131656	-0.063749	0.0481135	0.196207	NA	NA	NA	NA	NA	NA	NA	NA	NA	NA	NA	NA	NA	NA	NA	NA	NA	NA	NA
4074	-7.7901e+06	7.85201e+06	0.151589	-0.0736604	0.0435512	0.186892	-11.0151	6.50672	-26.2672	134.362	33.4736	4.18675	77.1471	74.8443	13.6013	67.368	15.2505	7.06243	16.2015	1382.53	12.2455	-31.3163	43.5618	5.51257	-24.9477
4075	-7.6901e+06	7.85201e+06	0.155255	-0.0923014	0.050512	0.189238	-11.3717	5.95633	-26.7029	129.017	34.2399	3.48713	81.3238	72.7633	11.9262	67.5972	12.3546	6.83672	15.8261	1375.78	11.4837	-31.6449	43.1286	5.31264	-25.8471
4076	-7.5901e+06	7.85201e+06	0.172383	-0.102222	0.054858	0.180322	-11.4497	5.8139	-27.0132	132.728	35.1411	2.94632	80.9862	72.96	11.2772	70.0469	11.5436	6.75601	15.6874	1377.03	11.2997	-31.7053	43.005	5.23369	-26.2814
4077	-7.4901e+06	7.85201e+06	0.155255	-0.0923014	0.050512	0.189238	NA	NA	NA	NA	NA	NA	NA	NA	NA	NA	NA	NA	NA	NA	NA	NA	NA	NA	NA
4087	-6.4901e+06	7.85201e+06	0.173288	-0.0865926	0.0571304	0.21221	NA	NA	NA	NA	NA	NA	NA	NA	NA	NA	NA	NA	NA	NA	NA	NA	NA	NA	NA
4088	-6.3901e+06	7.85201e+06	0.173288	-0.0865926	0.0571304	0.21221	NA	NA	NA	NA	NA	NA	NA	NA	NA	NA	NA	NA	NA	NA	NA	NA	NA	NA	NA
4103	-4.8901e+06	7.85201e+06	0.160191	-0.0552964	0.0864813	0.26256	NA	NA	NA	NA	NA	NA	NA	NA	NA	NA	NA	NA	NA	NA	NA	NA	NA	NA	NA
4104	-4.7901e+06	7.85201e+06	0.18399	-0.0739215	0.0910166	0.245654	NA	NA	NA	NA	NA	NA	NA	NA	NA	NA	NA	NA	NA	NA	NA	NA	NA	NA	NA
4105	-4.6901e+06	7.85201e+06	0.18399	-0.0739215	0.0910166	0.245654	-15.9233	3.89298	-33.2433	165.852	31.7119	4.68947	57.4923	78.4357	17.1877	69.1478	18.4885	6.76418	14.0753	1546.86	10.725	-38.031	48.756	2.84817	-32.9753
4106	-4.5901e+06	7.85201e+06	0.160191	-0.0552964	0.0864813	0.26256	-14.9049	3.67736	-31.3424	173.018	32.9947	4.66248	57.1306	81.5573	17.7708	69.0487	18.6878	6.41643	17.6131	1457.15	9.91663	-35.9175	45.8341	2.68857	-31.1536
4107	-4.4901e+06	7.85201e+06	0.18399	-0.0739215	0.0910166	0.245654	NA	NA	NA	NA	NA	NA	NA	NA	NA	NA	NA	NA	NA	NA	NA	NA	NA	NA	NA
4163	1.1099e+06	7.85201e+06	-0.0114172	-0.0505157	0.0320557	0.247553	NA	NA	NA	NA	NA	NA	NA	NA	NA	NA	NA	NA	NA	NA	NA	NA	NA	NA	NA
4164	1.2099e+06	7.85201e+06	0.049067	-0.0576834	-0.00796027	0.211274	0.227622	8.82452	-6.80917	637.848	71.7249	38.4772	19.5456	197.075	122.913	153.879	164.858	4.97417	21.3228	650.512	13.0266	-10.1109	23.1376	1.75236	0.120907
4165	1.3099e+06	7.85201e+06	0.049067	-0.0576834	-0.00796027	0.211274	0.116656	9.1214	-7.41699	568.802	65.8667	34.0649	22.0896	180.556	105.805	158.936	130.147	5.2114	20.9726	683.587	13.6042	-10.9714	24.5756	5.38643	-2.96046
4166	1.4099e+06	7.85201e+06	0.0663789	-0.0601274	0.00105238	0.19977	-0.419628	8.98208	-8.33484	530.225	60.4045	31.1915	23.4631	169.412	96.4489	162.59	115.32	6.06991	22.7413	715.492	14.0343	-12.5541	26.5884	6.8624	-4.63699
4167	1.5099e+06	7.85201e+06	0.0515121	-0.0726125	0.0221825	0.2074	NA	NA	NA	NA	NA	NA	NA	NA	NA	NA	NA	NA	NA	NA	NA	NA	NA	NA	NA
4168	1.6099e+06	7.85201e+06	0.0546561	-0.0823046	0.0153846	0.176925	NA	NA	NA	NA	NA	NA	NA	NA	NA	NA	NA	NA	NA	NA	NA	NA	NA	NA	NA
4185	3.3099e+06	7.85201e+06	0.283058	-0.0828811	0.111083	0.269336	-9.38011	5.2341	-22.711	264.409	37.7229	15.0643	31.7056	97.2227	46.9302	96.778	50.8415	6.77035	17.5675	1160.33	10.0163	-28.5312	38.5475	4.06846	-19.6827
4186	3.4099e+06	7.85201e+06	0.282386	-0.0955889	0.0801016	0.242126	-9.69424	5.57606	-23.4024	264.439	39.1434	15.0836	32.1022	97.266	46.9087	96.4709	50.1249	6.82078	17.2332	1207.37	10.5462	-29.0428	39.5891	3.81823	-20.5115
4187	3.5099e+06	7.85201e+06	0.293262	-0.0850341	0.116647	0.24314	-10.1017	5.76336	-24.2043	269.999	40.4893	15.4852	32.2336	99.1452	48.0631	97.9149	51.3432	6.81205	16.8312	1253.24	10.7308	-29.7477	40.4784	2.54191	-21.2555
4188	3.6099e+06	7.85201e+06	0.283058	-0.0828811	0.111083	0.269336	NA	NA	NA	NA	NA	NA	NA	NA	NA	NA	NA	NA	NA	NA	NA	NA	NA	NA	NA
4189	3.7099e+06	7.85201e+06	0.186407	-0.0706877	0.117588	0.268122	-10.636	6.11338	-25.4602	279.772	44.2873	14.9537	37.7642	108.95	47.3816	108.844	51.7003	7.06541	16.5873	1318.41	11.7042	-30.912	42.6161	5.73524	-22.57
4190	3.8099e+06	7.85201e+06	0.126182	-0.0751908	0.109721	0.245238	-10.9783	6.61758	-26.4234	296.473	46.602	15.0474	38.7442	115.796	48.3177	115.701	55.8662	7.08748	15.8261	1381.71	12.953	-31.851	44.804	6.57507	-21.4647
4191	3.9099e+06	7.85201e+06	0.148609	-0.0778052	0.114935	0.223234	-11.1633	7.20085	-27.152	332.575	48.6614	16.5954	35.1513	123.851	54.8105	122.581	67.3185	6.91625	14.886	1439.19	13.9848	-32.4597	46.4445	6.99838	-19.6439
4192	4.0099e+06	7.85201e+06	0.174903	-0.0904475	0.103478	0.208256	-11.0579	7.85058	-27.3954	366.954	49.726	18.9311	30.2266	129.435	62.3552	123.312	78.9335	6.71212	14.1734	1477.69	14.7839	-32.5634	47.3473	5.66845	-17.4992
4193	4.1099e+06	7.85201e+06	0.128405	-0.0925742	0.0983042	0.194552	-11.0179	8.28064	-27.489	388.869	50.1902	20.6801	26.9332	132.09	67.348	123.959	86.1016	6.79715	14.1738	1498.07	15.3433	-32.6106	47.9539	3.73557	-16.1563
4194	4.2099e+06	7.85201e+06	0.120931	-0.0692722	0.0711527	0.189399	-11.1992	8.26504	-27.6012	406.45	50.29	22.2773	24.9648	134.94	71.8318	126.352	90.5124	7.06241	14.6329	1502.92	15.6228	-32.6388	48.2616	2.72163	-15.9577
4195	4.3099e+06	7.85201e+06	0.0811306	-0.0726688	0.068479	0.177865	-11.4449	8.23403	-27.8447	407.363	49.2162	22.5613	24.7816	134.278	72.0055	127.22	89.8454	7.24888	14.8689	1514.04	15.9184	-32.8278	48.7462	3.58411	-16.374
4196	4.4099e+06	7.85201e+06	0.100766	-0.0747873	0.0749673	0.165573	-11.7882	8.2465	-28.3905	390.288	47.9271	21.539	26.6543	131.278	68.3045	126.298	82.8624	7.447	14.9835	1537.2	16.2214	-33.4728	49.6942	5.56644	-18.9903
4197	4.5099e+06	7.85201e+06	0.111054	-0.0834861	0.0570453	0.15407	-12.0295	8.39613	-29.0288	371.05	47.5002	19.4508	31.0192	131.399	61.6007	128.486	73.0008	7.93384	15.5813	1564.41	16.4985	-34.4006	50.8991	7.4648	-23.5533
4198	4.6099e+06	7.85201e+06	0.131888	-0.068264	0.052457	0.207408	-12.2438	8.45252	-29.5991	358.105	48.7174	17.0226	36.9518	135.759	54.7939	134.087	63.3367	8.47819	16.3566	1584.49	16.4957	-35.3141	51.8098	7.76559	-25.7928
4199	4.7099e+06	7.85201e+06	0.165472	-0.0854334	0.0608631	0.188131	-12.4935	8.61426	-30.534	338.435	48.7497	14.8597	40.9575	134.783	49.3407	131.903	54.8062	8.84317	16.674	1624.03	16.5204	-36.5168	53.0372	7.74712	-28.6349
4200	4.8099e+06	7.85201e+06	0.165472	-0.0854334	0.0608631	0.188131	-12.6612	8.98428	-31.5281	313.336	47.1627	12.9869	43.711	128.792	43.7423	124.849	47.3185	9.01797	16.5586	1675.35	16.8416	-37.642	54.4836	7.89359	-29.9424
4201	4.9099e+06	7.85201e+06	0.149328	-0.0788902	0.0564884	0.198029	-12.8334	9.17168	-31.9833	293.815	45.7632	11.4575	46.0867	123.695	39.1307	119.767	41.5142	9.04395	16.3764	1701.04	17.0798	-38.1603	55.2401	7.85543	-30.3552
4202	5.0099e+06	7.85201e+06	0.165107	-0.0885043	0.0601359	0.189544	-13.2611	8.58623	-31.8397	290.546	46.2256	10.5856	48.2332	123.374	36.161	121.578	37.5386	8.78786	16.1214	1676.37	16.5529	-37.9394	54.4924	7.54316	-30.5135
4203	5.1099e+06	7.85201e+06	0.148841	-0.0808218	0.0648431	0.197595	-13.7725	8.08376	-32.4307	281.517	45.8004	10.0032	50.1802	120.905	33.9735	120.476	34.3345	8.54	15.6969	1683.58	15.8653	-38.4898	54.3551	7.54098	-31.4687
4204	5.2099e+06	7.85201e+06	0.148874	-0.0862609	0.0548519	0.201095	-14.0562	7.77669	-33.1035	266.232	44.4151	9.24354	52.3791	117.605	31.381	117.254	32.4901	8.34397	15.3284	1698.72	15.1743	-39.1711	54.3454	7.3035	-31.9335
4205	5.3099e+06	7.85201e+06	0.148874	-0.0862609	0.0548519	0.201095	-14.3198	7.17401	-33.1234	269.84	44.2875	9.21253	53.1598	120.639	31.1785	120.576	32.3956	7.95444	14.906	1677.7	14.2688	-39.0217	53.2905	7.0773	-31.9534
4206	5.4099e+06	7.85201e+06	0.159509	-0.0859424	0.0737552	0.202102	-14.6323	6.93479	-33.5097	269.519	44.1441	9.24597	53.2649	120.76	30.8541	120.76	32.0366	7.75928	14.5432	1684.55	14.0894	-39.2416	53.3309	6.93476	-32.293
4207	5.5099e+06	7.85201e+06	0.175268	-0.0933811	0.0686236	0.193837	-14.5596	7.66746	-34.1572	254.519	42.7192	8.70249	54.7723	116.09	28.318	116.09	29.8756	8.03319	14.5729	1737.6	15.2158	-39.8909	55.1067	7.66726	-32.6386
4208	5.6099e+06	7.85201e+06	0.20222	-0.103268	0.075652	0.17604	-14.4367	8.63957	-35.3335	231.465	39.5994	7.69465	56.1415	107.077	25.1061	107.026	27.0491	8.62439	14.9371	1821.49	16.453	-41.2568	57.7098	8.60185	-33.3316
4209	5.7099e+06	7.85201e+06	0.193306	-0.100741	0.0598784	0.173875	-14.5448	8.85569	-36.1213	219.14	36.6511	7.50947	54.4425	99.4429	24.6729	98.9654	26.7455	8.98824	15.2639	1862.58	16.7409	-42.1036	58.8445	8.62791	-33.7159
4210	5.8099e+06	7.85201e+06	0.193306	-0.100741	0.0598784	0.173875	-14.6511	8.75626	-36.446	214.713	34.2768	8.00389	51.2517	93.8001	25.6747	92.1426	29.1314	9.03484	15.2992	1872.16	16.6682	-42.3323	59.0006	8.07887	-32.9922
4211	5.9099e+06	7.85201e+06	0.179831	-0.0992578	0.0550631	0.183663	-14.584	8.72319	-36.3076	223.563	34.2537	8.60158	48.9597	94.9334	27.5239	91.6988	32.9491	8.95248	15.2343	1865.45	16.6512	-42.0825	58.7336	7.3224	-31.2592
4212	6.0099e+06	7.85201e+06	0.20528	-0.108243	0.0629287	0.167457	-14.4689	8.51864	-35.553	253.186	38.124	9.61433	48.3934	105.985	31.1237	102.419	37.8395	8.69143	15.0713	1827.08	16.494	-41.1393	57.6333	6.7068	-30.3315
4213	6.1099e+06	7.85201e+06	0.222553	-0.0990454	0.0684748	0.160843	-14.344	8.2681	-34.7528	288.969	43.795	11.247	48.0684	119.954	36.5576	117.079	44.1903	8.34556	14.8163	1785.14	16.12	-40.1664	56.2863	6.4878	-30.366
4214	6.2099e+06	7.85201e+06	0.232481	-0.106035	0.0709598	0.155419	-13.9853	8.47398	-34.2559	313.131	48.5067	12.3513	48.5796	130.868	40.304	128.763	50.5389	8.26236	14.8212	1773.73	16.1	-39.7306	55.8306	6.87755	-28.2979
4215	6.3099e+06	7.85201e+06	0.222553	-0.0990454	0.0684748	0.160843	-13.7717	8.53443	-34.0848	327.472	51.5556	12.9182	48.6092	138.401	42.8969	136.857	56.1538	8.63176	15.5481	1772.28	15.9806	-39.769	55.7496	7.29782	-24.7163
4216	6.4099e+06	7.85201e+06	0.222553	-0.0990454	0.0684748	0.160843	-14.0276	8.17352	-34.703	312.597	50.3709	11.7875	49.2369	135.35	41.3722	134.88	57.8919	9.47875	16.9943	1789.92	15.576	-40.3398	55.9159	7.6856	-23.3595
4217	6.5099e+06	7.85201e+06	0.200106	-0.0832417	0.0628564	0.173104	-14.7795	8.17926	-37.2882	270.638	45.8106	9.8319	52.2699	122.629	35.4631	122.61	50.023	10.1633	17.4473	1905.31	15.6828	-42.6348	58.3176	8.14695	-26.5806
4218	6.6099e+06	7.85201e+06	0.181924	-0.075966	0.0509855	0.160772	-14.9201	8.41403	-38.1263	237.3	42.9573	8.36745	57.407	112.318	29.3776	112.026	38.7498	9.97846	17.0669	1953.17	15.8541	-43.2094	59.0635	8.3997	-29.0236
4219	6.7099e+06	7.85201e+06	0.180853	-0.117616	0.0580744	0.168826	-14.6966	8.24799	-36.4973	216.141	41.6168	7.19772	63.6232	106.911	24.3428	106.533	29.3794	9.12458	16.1373	1878.19	15.4369	-41.4491	56.886	8.14737	-29.5733
4220	6.8099e+06	7.85201e+06	0.195496	-0.122315	0.0623736	0.160318	-14.4546	7.81292	-34.5817	204.033	40.8805	6.36221	68.4752	104.499	21.0782	104.335	23.5446	8.36216	15.3938	1779.5	14.6821	-39.3945	54.0766	7.61203	-30.8982
4221	6.9099e+06	7.85201e+06	0.19424	-0.120794	0.0835097	0.168205	-14.2744	7.55066	-33.8905	194.966	39.567	5.92556	70.1054	101.214	19.4967	101.079	21.1534	8.04759	15.2388	1737.01	14.0785	-38.6105	52.689	7.37481	-30.8195
4222	7.0099e+06	7.85201e+06	0.20788	-0.128413	0.0858705	0.16114	-14.2057	7.36211	-33.7761	193.961	38.1137	6.03576	67.01	98.4231	19.976	98.3389	22.4849	7.89063	15.1167	1722.45	13.6478	-38.4311	52.079	7.24555	-28.4718
4223	7.1099e+06	7.85201e+06	0.20788	-0.128413	0.0858705	0.16114	-14.1545	7.22031	-33.6057	198.177	36.5099	6.56685	61.0951	95.7894	21.8835	95.7738	25.7646	7.71756	14.9172	1709.74	13.4305	-38.1981	51.6286	7.19762	-27.4849
4224	7.2099e+06	7.85201e+06	0.20788	-0.128413	0.0858705	0.16114	-14.1332	7.05742	-33.3113	202.278	35.1367	6.98228	56.3345	93.7882	23.4601	93.7882	28.8413	7.55073	14.7332	1694.11	13.2952	-37.8779	51.1731	7.05742	-26.969
4225	7.3099e+06	7.85201e+06	0.220629	-0.132408	0.0887108	0.153368	-14.2713	6.8924	-33.143	205.35	34.2712	7.19847	53.2674	92.6333	24.5993	92.6333	30.8246	7.48604	14.6543	1685.66	13.2615	-37.7849	51.0465	6.8924	-27.2817
4226	7.4099e+06	7.85201e+06	0.198549	-0.115015	0.0892316	0.186828	-14.4968	6.60549	-33.0874	205.551	33.5713	7.19607	51.7183	91.4917	25.0376	91.4917	31.5892	7.50007	14.7502	1676.87	13.0574	-37.7859	50.8433	6.60549	-27.7719
4227	7.5099e+06	7.85201e+06	0.174604	-0.107149	0.0828859	0.205459	-14.6796	6.31497	-32.9435	204.915	33.0933	7.4858	50.5421	90.3777	25.554	90.3777	31.9037	7.53781	14.951	1663.64	12.8125	-37.6058	50.4183	6.31497	-28.1247
4228	7.6099e+06	7.85201e+06	0.184061	-0.118149	0.0796407	0.176486	-14.9293	5.63372	-32.6661	191.03	30.758	7.22932	49.1551	83.2477	24.5896	83.2291	30.1881	7.47869	15.1384	1631.37	12.0139	-37.3907	49.4046	5.61287	-28.4911
4229	7.7099e+06	7.85201e+06	0.194852	-0.121208	0.0987351	0.179108	-14.9295	5.46762	-32.5283	179.025	29.0685	6.80066	49.4123	78.0321	22.8804	77.8136	28.2387	7.38074	15.1332	1618.76	11.7092	-37.0484	48.7575	5.20388	-28.3974
4230	7.8099e+06	7.85201e+06	0.160773	-0.106227	0.0937955	0.199591	-14.7535	5.65324	-32.4425	170.733	28.192	6.61627	50.6509	75.5369	21.7299	74.7432	26.3266	7.27203	15.0319	1619.08	11.7279	-36.6183	48.3462	4.78613	-28.0157
4231	7.9099e+06	7.85201e+06	0.15092	-0.105736	0.0802516	0.195699	NA	NA	NA	NA	NA	NA	NA	NA	NA	NA	NA	NA	NA	NA	NA	NA	NA	NA	NA
4232	8.0099e+06	7.85201e+06	0.15092	-0.105736	0.0802516	0.195699	NA	NA	NA	NA	NA	NA	NA	NA	NA	NA	NA	NA	NA	NA	NA	NA	NA	NA	NA
4428	-8.4901e+06	7.75201e+06	0.171469	-0.108804	0.0637529	0.181655	NA	NA	NA	NA	NA	NA	NA	NA	NA	NA	NA	NA	NA	NA	NA	NA	NA	NA	NA
4429	-8.3901e+06	7.75201e+06	0.168506	-0.0879559	0.0474597	0.179662	NA	NA	NA	NA	NA	NA	NA	NA	NA	NA	NA	NA	NA	NA	NA	NA	NA	NA	NA
4430	-8.2901e+06	7.75201e+06	0.151163	-0.0772431	0.0427027	0.188541	-9.25629	8.11627	-23.9016	182.985	37.8536	6.20605	64.871	94.1106	23.4777	78.7262	25.5921	7.39162	17.4435	1340.08	14.3381	-28.0801	42.4181	6.4773	-21.5801
4431	-8.1901e+06	7.75201e+06	0.184984	-0.0913442	0.0432908	0.170405	-9.55839	8.21476	-24.5944	179.887	38.0588	6.24874	65.5642	92.3684	22.1786	78.3679	23.6741	7.74464	17.7587	1374.06	14.5261	-29.042	43.5681	6.51184	-23.9037
4432	-8.0901e+06	7.75201e+06	0.185472	-0.0894126	0.0349361	0.170839	-9.80161	8.40663	-25.2193	176.268	39.2829	6.18081	67.623	91.0287	21.0986	79.5045	22.1894	8.0955	18.0036	1409.14	14.8033	-30.1032	44.9065	6.66384	-23.9905
4433	-7.9901e+06	7.75201e+06	0.185472	-0.0894126	0.0349361	0.170839	-10.1082	8.42589	-25.8244	170.128	40.1361	5.71597	69.8859	88.059	19.9597	80.1326	21.2694	8.26224	17.9435	1437.61	14.8487	-31.1185	45.9672	6.97507	-23.1724
4434	-7.8901e+06	7.75201e+06	0.199895	-0.0954548	0.0403371	0.162235	-10.3291	8.36028	-26.1298	164.908	40.4981	5.27733	72.0203	85.2663	18.7272	80.9596	20.8722	8.44539	18.0759	1450.56	14.8514	-31.7799	46.6313	7.40325	-23.0037
4435	-7.7901e+06	7.75201e+06	0.169169	-0.0965805	0.0399148	0.155606	-10.5022	8.2144	-26.3945	162.829	39.5102	5.14215	71.8147	83.2095	18.3447	81.5472	19.5188	8.56727	18.2786	1453.36	14.776	-32.0328	46.8088	7.62895	-24.4584
4436	-7.6901e+06	7.75201e+06	0.15387	-0.0896484	0.043435	0.161658	-10.7232	7.74812	-26.5212	162.015	36.9952	4.88638	68.6616	81.551	18.0977	80.5649	19.3888	8.44692	18.3396	1435.27	14.289	-31.7669	46.0559	7.06658	-24.4155
4437	-7.5901e+06	7.75201e+06	0.168726	-0.0983366	0.04751	0.155211	-11.0888	7.15912	-26.643	156.698	33.821	4.27386	66.3575	78.9851	16.9993	77.3675	19.7063	8.3655	18.4684	1415.46	13.693	-31.6527	45.3457	6.15656	-23.4181
4438	-7.4901e+06	7.75201e+06	0.171379	-0.117517	0.053292	0.158677	-11.4163	6.65986	-26.6136	146.832	30.9802	3.6337	66.4161	75.3223	15.2144	73.2445	19.3586	8.5611	19.0305	1397.08	13.2381	-31.8007	45.0388	5.71739	-22.2574
4439	-7.3901e+06	7.75201e+06	0.171379	-0.117517	0.053292	0.158677	-11.2337	7.07343	-26.4708	140.069	29.0413	3.45771	66.2286	72.1285	13.9609	69.927	18.4916	8.93753	19.5089	1411.6	13.8519	-32.0433	45.8953	6.04555	-21.649
4440	-7.2901e+06	7.75201e+06	0.176077	-0.0956654	0.0556845	0.194501	-10.7178	7.64003	-25.8943	157.286	32.7693	4.39569	67.1742	80.3286	15.4946	76.8327	18.1656	8.60832	19.8597	1413.5	14.482	-31.3449	45.8268	6.4293	-22.4352
4441	-7.1901e+06	7.75201e+06	0.169579	-0.0962859	0.0469805	0.174715	NA	NA	NA	NA	NA	NA	NA	NA	NA	NA	NA	NA	NA	NA	NA	NA	NA	NA	NA
4442	-7.0901e+06	7.75201e+06	0.165952	-0.0818202	0.0752349	0.230334	NA	NA	NA	NA	NA	NA	NA	NA	NA	NA	NA	NA	NA	NA	NA	NA	NA	NA	NA
4443	-6.9901e+06	7.75201e+06	0.198718	-0.0733999	0.0611935	0.191252	NA	NA	NA	NA	NA	NA	NA	NA	NA	NA	NA	NA	NA	NA	NA	NA	NA	NA	NA
4444	-6.8901e+06	7.75201e+06	0.198718	-0.0733999	0.0611935	0.191252	-9.63061	9.18954	-25.8517	170.531	32.8572	5.98047	57.9303	78.9939	19.8125	71.7182	21.8004	7.35203	16.5039	1473.56	15.7798	-30.9942	46.7741	7.71113	-21.1337
4445	-6.7901e+06	7.75201e+06	0.213962	-0.0809209	0.0657811	0.180669	-9.88147	9.23272	-26.4218	148.124	30.2725	4.89262	62.6879	72.8273	16.7971	65.8616	19.1824	7.47181	15.964	1494.69	15.9855	-30.8032	46.7887	7.5985	-19.7515
4446	-6.6901e+06	7.75201e+06	0.213962	-0.0809209	0.0657811	0.180669	-10.272	8.86692	-26.9449	142.414	30.0747	4.67237	66.4435	72.6469	16.1264	64.5791	17.9661	7.36584	15.6909	1498.48	15.5195	-31.41	46.9295	7.19186	-19.196
4447	-6.5901e+06	7.75201e+06	0.213962	-0.0809209	0.0657811	0.180669	-10.5644	8.5152	-27.2308	152.561	30.6042	5.72925	64.0953	75.3313	18.9262	64.6978	19.6106	7.26262	15.7632	1495.59	14.9922	-31.8445	46.8366	5.99864	-22.7093
4448	-6.4901e+06	7.75201e+06	0.213962	-0.0809209	0.0657811	0.180669	-10.4441	8.04029	-26.6496	177.697	32.145	7.34189	55.5352	81.1668	23.7481	67.8145	24.4225	7.10886	15.9697	1450.88	14.3344	-31.1885	45.523	4.31962	-25.9673
4449	-6.3901e+06	7.75201e+06	0.173288	-0.0865926	0.0571304	0.21221	-10.2344	7.31449	-25.6805	191.601	34.4184	7.66719	54.386	87.6872	25.2301	74.3179	26.267	7.06536	16.6221	1376.53	13.4974	-30.1354	43.6328	3.62312	-24.6667
4450	-6.2901e+06	7.75201e+06	0.232411	-0.0976076	0.0528129	0.188134	-10.2544	6.70118	-24.9384	192.683	37.6668	6.36793	63.5947	96.7286	21.2114	84.7444	21.8427	7.13136	17.6779	1317.34	12.9096	-29.3892	42.2988	4.84727	-24.027
4451	-6.1901e+06	7.75201e+06	0.212563	-0.0864885	0.0594915	0.200411	NA	NA	NA	NA	NA	NA	NA	NA	NA	NA	NA	NA	NA	NA	NA	NA	NA	NA	NA
4464	-4.8901e+06	7.75201e+06	0.181565	-0.0599571	0.0942823	0.23698	-14.9695	4.56231	-32.7579	153.917	30.1371	4.3995	59.8865	73.9896	15.8351	66.004	16.5392	6.95463	14.1894	1561.56	11.2345	-37.796	49.0305	3.85632	-32.6282
4465	-4.7901e+06	7.75201e+06	0.181565	-0.0599571	0.0942823	0.23698	-14.9807	4.81462	-32.7756	181.675	33.9826	5.41548	55.7388	83.894	19.7131	75.8165	19.9842	6.96252	14.0738	1568.11	11.72	-37.7705	49.4905	3.97637	-32.6978
4466	-4.6901e+06	7.75201e+06	0.181565	-0.0599571	0.0942823	0.23698	-14.566	4.38783	-31.8823	201.046	38.095	5.52214	57.6891	93.9383	20.4014	84.5066	20.4811	6.68888	14.5156	1510.58	10.7588	-36.6956	47.4544	3.56307	-31.8428
4467	-4.5901e+06	7.75201e+06	0.181565	-0.0599571	0.0942823	0.23698	NA	NA	NA	NA	NA	NA	NA	NA	NA	NA	NA	NA	NA	NA	NA	NA	NA	NA	NA
4468	-4.4901e+06	7.75201e+06	0.150886	-0.044323	0.0888748	0.261662	NA	NA	NA	NA	NA	NA	NA	NA	NA	NA	NA	NA	NA	NA	NA	NA	NA	NA	NA
4469	-4.3901e+06	7.75201e+06	0.175531	-0.0639456	0.0931925	0.244838	NA	NA	NA	NA	NA	NA	NA	NA	NA	NA	NA	NA	NA	NA	NA	NA	NA	NA	NA
4470	-4.2901e+06	7.75201e+06	0.175531	-0.0639456	0.0931925	0.244838	-13.4103	4.34463	-29.6762	224.544	42.1954	5.20052	61.0185	103.572	19.9424	91.4066	20.2374	6.07098	13.772	1412.19	10.6898	-34.1301	44.8198	2.64369	-29.5416
4471	-4.1901e+06	7.75201e+06	0.175531	-0.0639456	0.0931925	0.244838	NA	NA	NA	NA	NA	NA	NA	NA	NA	NA	NA	NA	NA	NA	NA	NA	NA	NA	NA
4522	909904	7.75201e+06	0.049067	-0.0576834	-0.00796027	0.211274	NA	NA	NA	NA	NA	NA	NA	NA	NA	NA	NA	NA	NA	NA	NA	NA	NA	NA	NA
4523	1.0099e+06	7.75201e+06	0.0409842	-0.0414981	0.012029	0.205788	1.59202	10.5119	-5.71782	766.88	93.6996	41.4475	25.4117	245.881	132.404	192.547	206.091	5.93352	24.2454	667.882	15.2557	-9.07851	24.3342	4.1188	1.65072
4524	1.1099e+06	7.75201e+06	0.0656059	-0.0377494	0.0111234	0.214806	-0.27972	9.51337	-8.30531	564.876	72.3821	31.7447	27.1599	188.988	100.587	179.396	127.115	6.1068	22.6393	735.811	14.4872	-12.2	26.6872	7.79894	-3.98288
4525	1.2099e+06	7.75201e+06	0.0656059	-0.0377494	0.0111234	0.214806	-1.64343	9.53636	-11.0399	514.036	68.0025	28.9765	31.1784	181.078	90.8044	173.153	106.562	7.26691	23.2372	844.073	15.2516	-15.8466	31.0983	7.81572	-6.6404
4526	1.3099e+06	7.75201e+06	0.0656059	-0.0377494	0.0111234	0.214806	-1.87041	10.0298	-12.3654	478.418	67.6593	24.9255	37.1803	180.85	78.0927	177.988	86.2812	7.93721	23.2152	911.729	16.1891	-17.8196	34.0087	9.36572	-8.17577
4527	1.4099e+06	7.75201e+06	0.0409842	-0.0414981	0.012029	0.205788	-1.42814	10.346	-11.9527	460.946	62.2644	23.0533	35.4628	171.602	72.646	171.179	85.4401	7.97521	23.3449	906.419	16.6086	-17.4778	34.0864	10.1466	-8.02536
4528	1.5099e+06	7.75201e+06	0.0601017	-0.051902	0.0172923	0.197703	-0.482256	10.3223	-10.1296	503.521	63.2904	26.9656	31.4142	179.822	83.705	178.655	98.9477	6.69805	21.7103	835.711	15.8831	-14.6651	30.5482	9.91062	-5.92293
4529	1.6099e+06	7.75201e+06	0.0514438	-0.0484913	0.0317005	0.222807	-0.117132	9.71451	-8.87624	527.349	64.3324	28.6066	29.4143	182.916	88.1456	182.333	104.13	5.86096	21.5385	761.727	14.4742	-12.7134	27.1875	9.55686	-5.55788
4530	1.7099e+06	7.75201e+06	0.0546561	-0.0823046	0.0153846	0.176925	NA	NA	NA	NA	NA	NA	NA	NA	NA	NA	NA	NA	NA	NA	NA	NA	NA	NA	NA
4531	1.8099e+06	7.75201e+06	0.0546561	-0.0823046	0.0153846	0.176925	NA	NA	NA	NA	NA	NA	NA	NA	NA	NA	NA	NA	NA	NA	NA	NA	NA	NA	NA
4532	1.9099e+06	7.75201e+06	0.0870688	-0.0795857	0.0152015	0.190018	NA	NA	NA	NA	NA	NA	NA	NA	NA	NA	NA	NA	NA	NA	NA	NA	NA	NA	NA
4544	3.1099e+06	7.75201e+06	0.0733889	-0.0808325	0.0274425	0.180715	-6.51633	6.48298	-18.4432	377.289	47.8699	18.5172	32.9198	137.28	60.9899	136.378	74.6593	6.90799	18.8332	1030.04	12.2867	-24.4258	36.7125	5.02727	-14.5706
4545	3.2099e+06	7.75201e+06	0.0952292	-0.0879622	0.0338065	0.170686	-6.9449	6.65272	-19.2261	439.134	51.5425	22.3026	28.2128	150.559	74.3099	149.601	94.3745	7.15179	18.7458	1069.6	13.2301	-24.9334	38.1635	6.02642	-13.8728
4546	3.3099e+06	7.75201e+06	0.0952292	-0.0879622	0.0338065	0.170686	NA	NA	NA	NA	NA	NA	NA	NA	NA	NA	NA	NA	NA	NA	NA	NA	NA	NA	NA
4547	3.4099e+06	7.75201e+06	0.10985	-0.0921168	0.0399672	0.162694	NA	NA	NA	NA	NA	NA	NA	NA	NA	NA	NA	NA	NA	NA	NA	NA	NA	NA	NA
4548	3.5099e+06	7.75201e+06	0.209564	-0.119568	0.0615209	0.166223	-8.66016	6.57289	-22.1472	300.889	44.9669	15.9385	33.8408	112.037	50.4339	111.618	58.2285	6.99636	17.4338	1200.81	12.4944	-27.6605	40.1549	5.97857	-19.0482
4549	3.6099e+06	7.75201e+06	0.133382	-0.11964	0.0581349	0.149575	-9.09967	6.87934	-23.2132	298.043	44.875	16.229	32.7275	109.249	51.3393	108.79	58.4804	6.98514	16.8602	1257.06	12.6904	-28.7489	41.4393	5.41805	-20.4846
4550	3.7099e+06	7.75201e+06	0.152541	-0.102546	0.0894833	0.183484	-9.52086	7.04729	-24.2478	300.653	45.96	16.7344	33.0827	110.369	52.7096	110.08	58.9244	7.07937	16.6294	1303.84	12.7248	-29.8454	42.5702	5.99265	-22.5763
4551	3.8099e+06	7.75201e+06	0.135201	-0.102259	0.0835684	0.197934	-10.1489	7.07787	-25.4178	300.157	47.9304	15.8601	37.81	116.017	50.2058	115.754	54.8393	7.2905	16.5696	1353.72	12.9082	-31.1007	44.009	6.45277	-24.0047
4552	3.9099e+06	7.75201e+06	0.138222	-0.101247	0.0764367	0.179584	-10.3905	7.65509	-26.2328	303.887	49.8327	14.7646	42.472	122.599	46.9951	120.092	52.5062	7.51948	16.1715	1414.98	14.7061	-31.8154	46.5215	7.43999	-23.0303
4553	4.0099e+06	7.75201e+06	0.138222	-0.101247	0.0764367	0.179584	-10.5002	8.28883	-26.8288	333.027	51.8257	16.0003	40.328	130.174	51.6553	124.829	61.0126	7.51902	15.5371	1466.2	16.0789	-32.3156	48.3945	8.06835	-21.9683
4554	4.1099e+06	7.75201e+06	0.146812	-0.108836	0.0573026	0.166487	-10.3926	8.7992	-26.9937	378.228	53.4517	19.4833	33.163	136.895	62.5321	130.689	76.8009	7.32862	14.9804	1491.42	16.5326	-32.3793	48.9119	6.95575	-19.8371
4555	4.2099e+06	7.75201e+06	0.138222	-0.101247	0.0764367	0.179584	-10.2199	9.28918	-26.9574	411.92	54.2688	21.8948	29.4259	143.291	69.5792	134.775	87.0962	7.35315	14.9042	1507.85	16.9682	-32.363	49.3312	3.11182	-18.1896
4556	4.3099e+06	7.75201e+06	0.111054	-0.0834861	0.0570453	0.15407	-10.2048	9.54722	-26.9997	438.377	55.196	23.444	27.7509	149.288	74.1944	138.734	94.3885	7.63566	15.3224	1520.14	17.4469	-32.3799	49.8268	1.67995	-16.2151
4557	4.4099e+06	7.75201e+06	0.0981392	-0.0874999	0.0238	0.133853	-10.2795	9.62401	-27.1459	455.685	55.7342	23.7026	27.4362	153.257	76.2564	142.537	99.0695	7.7871	15.5483	1531	17.6784	-32.386	50.0644	1.98932	-15.2373
4558	4.5099e+06	7.75201e+06	0.108585	-0.0764753	0.00612419	0.130559	-10.6381	9.27202	-27.3676	459.532	56.3082	23.7454	28.8205	156.096	75.5694	148.668	97.5937	7.58139	15.248	1527.53	17.3407	-32.3544	49.6951	4.08136	-17.217
4559	4.6099e+06	7.75201e+06	0.103718	-0.0460596	0.0114628	0.184231	-11.5966	8.37141	-28.1576	460.598	58.3028	23.5436	32.504	163.377	73.3609	161.165	90.7476	7.69318	15.4095	1524.8	16.7356	-33.1797	49.9152	6.85661	-21.0682
4560	4.7099e+06	7.75201e+06	0.130623	-0.073047	0.0212652	0.180072	-12.7629	7.32509	-29.2568	462.645	62.1512	21.9884	37.3758	174.822	69.3104	174.221	83.0808	8.18236	16.2221	1525.62	15.8396	-34.5943	50.4339	7.09521	-25.5325
4561	4.8099e+06	7.75201e+06	0.162597	-0.0689646	0.0430107	0.187978	-13.2245	7.21834	-30.1436	448.517	63.4102	19.5141	41.6979	177.641	62.2947	177.374	73.633	8.72771	16.9106	1552.53	15.7375	-35.8557	51.5932	7.075	-28.4615
4562	4.9099e+06	7.75201e+06	0.19151	-0.0729048	0.0329817	0.186194	-13.5211	7.29459	-30.9581	423.952	62.3229	16.9764	45.0335	173.99	54.9342	173.615	64.0039	9.07984	17.236	1585.43	15.7735	-36.9084	52.682	7.07646	-29.5441
4563	5.0099e+06	7.75201e+06	0.19151	-0.0729048	0.0329817	0.186194	-13.9183	7.33578	-31.8336	393.124	60.2484	14.8364	47.6214	165.478	48.5351	165.297	54.8869	9.23293	17.1751	1621.81	15.8596	-37.914	53.7735	7.18974	-30.3678
4564	5.1099e+06	7.75201e+06	0.179579	-0.0704861	0.0276684	0.195301	-13.7696	8.27286	-32.6853	344.246	55.8791	12.1866	50.9256	148.97	40.5234	148.778	44.3608	9.44068	16.9129	1691.75	16.8252	-39.0185	55.8437	8.00753	-31.0355
4565	5.2099e+06	7.75201e+06	0.138171	-0.0447401	0.0125991	0.220577	-13.5103	9.27877	-33.5181	294.425	51.5188	9.3758	55.8733	133.209	31.9864	132.734	34.5055	9.63761	16.6564	1762.92	17.7027	-40.1639	57.8665	8.64882	-31.5541
4566	5.3099e+06	7.75201e+06	0.138171	-0.0447401	0.0125991	0.220577	-13.4876	9.51497	-34.0063	268.375	49.2579	7.72276	59.811	125.646	26.8745	125.308	29.1384	9.59786	16.4065	1791.94	17.6577	-40.7819	58.4396	8.97709	-31.9361
4567	5.4099e+06	7.75201e+06	0.153063	-0.055003	0.0178377	0.211849	-13.9197	8.65453	-34.0398	277.396	49.4084	8.31347	58.4928	128.428	28.5133	128.399	30.4281	9.23183	16.1173	1763.35	16.566	-40.6045	57.1705	8.60182	-32.1304
4568	5.5099e+06	7.75201e+06	0.153063	-0.055003	0.0178377	0.211849	-14.2029	7.98614	-34.0149	287.859	49.7805	9.07943	56.9845	132.09	30.3535	132.09	32.3447	8.84544	15.7568	1738.88	15.7048	-40.3152	56.02	7.98614	-32.2258
4569	5.6099e+06	7.75201e+06	0.161516	-0.0641255	0.0512532	0.219637	-13.851	8.59856	-34.2817	278.232	48.2229	8.65158	57.5445	129.305	29.0223	129.305	31.7663	8.73438	15.3562	1772.61	16.2892	-40.5258	56.815	8.59856	-32.1419
4570	5.7099e+06	7.75201e+06	0.166479	-0.0710187	0.0390375	0.208785	-13.606	9.48482	-35.0017	266.089	46.7896	7.76189	59.4606	126.217	26.0189	126.217	29.7464	8.8944	15.1516	1835.83	17.3579	-41.3055	58.6634	9.48482	-32.3605
4571	5.8099e+06	7.75201e+06	0.17989	-0.077072	0.0435925	0.199675	-13.7051	9.99529	-35.9223	258.899	45.3938	7.30655	59.8579	122.619	24.0947	122.617	27.9731	9.31294	15.3949	1894.71	18.1239	-42.3127	60.4366	9.9922	-32.8808
4572	5.9099e+06	7.75201e+06	0.17989	-0.077072	0.0435925	0.199675	-13.9833	10.2229	-37.0216	245.523	42.3724	7.1929	58.3974	113.965	23.426	113.833	27.2034	9.8478	15.8215	1950.07	18.6575	-43.5409	62.1985	10.061	-33.584
4573	6.0099e+06	7.75201e+06	0.17989	-0.077072	0.0435925	0.199675	-14.2172	10.2533	-37.7568	236.842	39.2368	7.42837	55.5516	105.969	24.0231	105.342	28.5007	10.0451	15.8965	1981.86	18.873	-44.2654	63.1384	9.71484	-33.466
4574	6.1099e+06	7.75201e+06	0.166479	-0.0710187	0.0390375	0.208785	-14.3404	10.1346	-37.8773	242.489	38.4711	8.01049	52.8025	104.816	26.3098	103.455	31.4795	9.8016	15.5538	1982.27	18.7836	-44.1474	62.9311	9.16094	-33.8635
4575	6.2099e+06	7.75201e+06	0.166388	-0.0698945	0.0469664	0.207116	-14.1594	10.1373	-37.4033	257.447	40.5072	8.31747	52.8334	110.381	27.9945	108.107	34.0055	9.38773	15.1297	1962.75	18.6341	-43.3444	61.9786	8.50669	-33.3916
4576	6.3099e+06	7.75201e+06	0.196977	-0.0777249	0.0340354	0.168291	-13.6106	10.5254	-36.6644	278.123	43.8123	9.42332	52.9249	118.949	30.8972	116.188	36.9546	9.0761	14.8286	1947.69	18.7619	-42.4292	61.1912	8.45612	-31.6832
4577	6.4099e+06	7.75201e+06	0.221473	-0.0883443	0.0398989	0.171882	-13.2503	10.5776	-35.8355	305.847	48.352	11.032	52.5762	131.266	35.514	129.183	42.0126	9.15676	15.2139	1918.06	18.6076	-41.7039	60.3114	8.60442	-30.2256
4578	6.5099e+06	7.75201e+06	0.200783	-0.0765127	0.0455841	0.18291	-13.602	9.65638	-35.0764	333.637	54.2473	11.6798	53.4683	147.475	39.1189	146.664	48.9952	9.76388	16.6673	1855.68	17.7522	-41.0474	58.7996	8.63412	-29.2695
4579	6.6099e+06	7.75201e+06	0.230724	-0.089897	0.0442408	0.164525	-14.4158	8.61061	-35.4568	336.361	57.1135	10.7903	55.6787	155.239	38.7478	155.12	52.577	10.3871	17.9197	1836.44	16.838	-41.2518	58.0898	8.37309	-28.3157
4580	6.7099e+06	7.75201e+06	0.209885	-0.0755552	0.0322556	0.177548	-14.9345	8.82509	-37.3146	298.773	52.8255	9.37112	57.5851	142.299	34.6081	142.293	47.802	10.7375	17.9634	1927.08	17.0312	-42.8747	59.9059	8.8109	-28.3884
4581	6.8099e+06	7.75201e+06	0.202292	-0.0734027	0.0188188	0.175703	-15.1164	9.4454	-38.5184	257.522	47.8369	7.7435	61.313	126.967	28.7306	126.967	38.8914	10.7231	17.3961	2004.6	17.6957	-43.953	61.6487	9.4454	-29.585
4582	6.9099e+06	7.75201e+06	0.202292	-0.0734027	0.0188188	0.175703	-15.102	9.79755	-38.4883	229.41	45.6625	6.02195	67.8407	118.819	22.7163	118.819	30.2413	10.3474	16.6848	2018.88	17.964	-43.9377	61.9018	9.79755	-29.5302
4583	7.0099e+06	7.75201e+06	0.202292	-0.0734027	0.0188188	0.175703	-14.9003	9.45485	-36.9685	225.675	47.7938	5.1657	74.3575	122.607	19.4494	122.607	25.2135	9.84074	16.445	1942.74	17.468	-42.281	59.749	9.45485	-28.7925
4584	7.1099e+06	7.75201e+06	0.202292	-0.0734027	0.0188188	0.175703	-14.9367	8.78401	-35.8976	234.539	50.8381	5.02975	77.3589	130.114	19.119	130.114	23.9421	9.49456	16.4634	1871.12	16.5675	-41.0473	57.6148	8.78401	-30.6481
4585	7.2099e+06	7.75201e+06	0.216972	-0.0833099	0.0465237	0.163428	-14.6852	8.8444	-35.7479	232.519	49.602	5.16821	75.9838	127.527	19.2279	127.527	24.4463	9.32854	16.3008	1863.55	16.3185	-40.8288	57.1473	8.8444	-30.2777
4586	7.3099e+06	7.75201e+06	0.20801	-0.0942734	0.0551793	0.172225	-14.2221	9.09645	-35.4756	225.579	45.6882	5.22317	71.465	119.105	19.4794	119.105	26.8129	9.08563	15.9814	1858.29	16.3157	-40.4248	56.7405	9.09645	-28.0587
4587	7.4099e+06	7.75201e+06	0.219224	-0.0991544	0.0589065	0.164943	-13.7962	9.33567	-35.1727	219.849	41.4121	5.45483	65.3242	109.923	20.544	109.923	29.7662	8.79219	15.5581	1852.68	16.3847	-40.0204	56.405	9.33567	-26.6203
4588	7.5099e+06	7.75201e+06	0.225724	-0.0804755	0.0292535	0.154625	-13.6922	9.12004	-34.5884	219.643	38.9356	6.06548	59.8714	104.708	22.4473	104.708	32.5391	8.49204	15.2992	1821.84	16.1203	-39.3118	55.4321	9.12004	-26.4546
4589	7.6099e+06	7.75201e+06	0.212117	-0.0887858	0.066419	0.165481	-13.9342	8.4866	-34.0825	218.612	37.0593	6.60158	55.5038	100.366	24.1291	100.366	34.1664	8.26311	15.2534	1781.74	15.4708	-38.6722	54.1429	8.48657	-26.6676
4590	7.7099e+06	7.75201e+06	0.202554	-0.100464	0.076316	0.17475	-14.1816	7.80796	-33.559	213.807	35.3622	6.62148	53.1511	95.7732	24.363	95.7147	34.4192	8.12398	15.3998	1740.1	14.7423	-38.0047	52.747	7.72509	-26.7157
4591	7.8099e+06	7.75201e+06	0.202554	-0.100464	0.076316	0.17475	-14.2708	7.53445	-33.4686	201.472	32.9768	6.50709	51.4172	88.6626	23.6985	88.1692	33.1447	8.05595	15.4516	1729.07	14.3682	-37.7519	52.12	6.82961	-24.8244
4592	7.9099e+06	7.75201e+06	0.209903	-0.112231	0.057136	0.157718	-14.2593	7.38778	-33.3485	190.164	31.3973	6.50793	50.9482	83.8591	23.3215	82.6233	31.0577	7.93442	15.4282	1718.88	14.0872	-37.4444	51.5316	5.99574	-24.3432
4593	8.0099e+06	7.75201e+06	0.190586	-0.117567	0.0780717	0.185169	-14.0902	7.33076	-33.028	181.133	30.604	6.2773	52.1013	81.0453	22.1652	79.5059	29.135	7.80857	15.4086	1702.28	13.8409	-36.9726	50.8135	5.78751	-24.8767
4594	8.1099e+06	7.75201e+06	0.190935	-0.114636	0.0787659	0.18382	-13.8386	7.46364	-32.7386	175.276	30.4226	6.04105	53.4837	79.6495	21.1247	77.8191	27.9664	7.74919	15.5678	1693.18	13.8976	-36.636	50.5336	5.83715	-25.2454
4595	8.2099e+06	7.75201e+06	0.203533	-0.12186	0.0811276	0.17669	-13.509	7.79945	-32.527	170.01	30.4988	5.87856	55.0239	78.6839	20.2564	76.3286	26.853	7.73364	15.2075	1694.07	14.2434	-36.573	50.8164	6.06582	-24.9958
4596	8.3099e+06	7.75201e+06	0.202259	-0.0995137	0.0366987	0.152628	NA	NA	NA	NA	NA	NA	NA	NA	NA	NA	NA	NA	NA	NA	NA	NA	NA	NA	NA
4597	8.4099e+06	7.75201e+06	0.214825	-0.110386	0.0306266	0.141364	-12.8387	7.23627	-30.7537	159.813	29.0468	5.63349	57.3869	76.7766	18.5673	71.1849	23.6587	7.93077	16.2487	1594.11	13.8127	-35.1019	48.9146	5.40453	-22.1758
4598	8.5099e+06	7.75201e+06	0.156181	-0.082968	0.0393349	0.160697	NA	NA	NA	NA	NA	NA	NA	NA	NA	NA	NA	NA	NA	NA	NA	NA	NA	NA	NA
4599	8.6099e+06	7.75201e+06	0.159904	-0.0778986	0.0520439	0.163557	-13.1873	5.46523	-29.5411	166.341	27.8929	6.47369	47.0333	71.6477	22.0884	67.469	29.2153	7.78191	17.15	1484.6	11.5473	-33.7202	45.2674	4.06137	-20.3897
4600	8.7099e+06	7.75201e+06	0.14558	-0.0914625	0.063268	0.174676	-12.552	5.56092	-28.2858	174.514	29.2595	6.734	47.2861	74.4583	23.0529	70.631	30.6627	7.5296	17.0974	1433.14	11.4498	-32.5371	43.9869	4.1421	-19.4553
4601	8.8099e+06	7.75201e+06	0.152084	-0.0980228	0.0486192	0.164443	-12.0009	6.37607	-27.6539	192.188	32.4185	7.55776	48.8384	82.6812	25.5529	78.5841	32.2468	7.72637	17.2567	1433.6	12.5529	-32.225	44.7779	4.53397	-19.7671
4602	8.9099e+06	7.75201e+06	0.152084	-0.0980228	0.0486192	0.164443	-11.6247	6.54929	-27.2102	201.509	33.8254	8.06221	49.6517	87.0582	27.25	81.7442	32.6791	7.77507	17.3956	1419.1	12.6539	-32.0498	44.7037	4.72108	-18.4565
4603	9.0099e+06	7.75201e+06	0.152084	-0.0980228	0.0486192	0.164443	-11.7176	6.13922	-27.0383	209.743	35.4417	8.1396	51.0047	91.3117	27.4679	85.1143	32.9322	7.67861	17.4543	1394.73	12.0537	-31.9323	43.986	4.41922	-17.4319
4604	9.1099e+06	7.75201e+06	0.152084	-0.0980228	0.0486192	0.164443	NA	NA	NA	NA	NA	NA	NA	NA	NA	NA	NA	NA	NA	NA	NA	NA	NA	NA	NA
4605	9.2099e+06	7.75201e+06	0.162435	-0.0786341	0.0610564	0.193094	NA	NA	NA	NA	NA	NA	NA	NA	NA	NA	NA	NA	NA	NA	NA	NA	NA	NA	NA
4606	9.3099e+06	7.75201e+06	0.142545	-0.0659995	0.0565546	0.203923	NA	NA	NA	NA	NA	NA	NA	NA	NA	NA	NA	NA	NA	NA	NA	NA	NA	NA	NA
4607	9.4099e+06	7.75201e+06	0.104303	-0.0640615	0.111232	0.278273	NA	NA	NA	NA	NA	NA	NA	NA	NA	NA	NA	NA	NA	NA	NA	NA	NA	NA	NA
4777	-9.6901e+06	7.65201e+06	0.175475	-0.0582176	0.0458613	0.190045	NA	NA	NA	NA	NA	NA	NA	NA	NA	NA	NA	NA	NA	NA	NA	NA	NA	NA	NA
4778	-9.5901e+06	7.65201e+06	0.175475	-0.0582176	0.0458613	0.190045	NA	NA	NA	NA	NA	NA	NA	NA	NA	NA	NA	NA	NA	NA	NA	NA	NA	NA	NA
4779	-9.4901e+06	7.65201e+06	0.175475	-0.0582176	0.0458613	0.190045	-10.2839	5.45497	-24.0276	304.863	44.9393	11.6439	43.3036	122.228	36.9909	103.458	56.6182	6.65216	16.8722	1251.53	10.9347	-28.5194	39.4541	4.67366	-15.1293
4780	-9.3901e+06	7.65201e+06	0.175475	-0.0582176	0.0458613	0.190045	NA	NA	NA	NA	NA	NA	NA	NA	NA	NA	NA	NA	NA	NA	NA	NA	NA	NA	NA
4785	-8.8901e+06	7.65201e+06	0.171469	-0.108804	0.0637529	0.181655	NA	NA	NA	NA	NA	NA	NA	NA	NA	NA	NA	NA	NA	NA	NA	NA	NA	NA	NA
4786	-8.7901e+06	7.65201e+06	0.171469	-0.108804	0.0637529	0.181655	-7.06067	7.92831	-19.7583	234.986	42.8693	9.74752	52.8228	108.27	33.2651	89.7261	36.8746	6.53665	17.4581	1158.75	13.4014	-23.9255	37.3269	6.95504	-12.401
4787	-8.6901e+06	7.65201e+06	0.18693	-0.117403	0.0672195	0.173564	-7.34111	7.86701	-19.9047	231.742	44.6476	9.15808	57.9088	112.456	30.9491	94.342	34.3403	6.83449	18.0788	1160.68	13.7507	-23.9922	37.7428	6.61659	-14.1831
4788	-8.5901e+06	7.65201e+06	0.167571	-0.0838833	0.0730229	0.16964	-7.57421	8.15013	-20.2413	226.596	46.4395	7.90103	63.5442	115.341	28.5577	99.0546	32.8023	7.3691	18.9935	1185.02	14.5157	-24.2288	38.7445	6.47473	-12.6794
4789	-8.4901e+06	7.65201e+06	0.190162	-0.0798284	0.0598972	0.155853	-8.02947	8.09555	-20.911	229.145	48.0653	7.70923	65.0496	117.027	29.6162	103.634	33.7864	7.76093	19.5774	1212.81	14.6297	-24.9488	39.5785	6.2443	-12.9786
4790	-8.3901e+06	7.65201e+06	0.184906	-0.0978586	0.052826	0.162529	-8.75694	7.82069	-21.938	242.738	51.504	8.31003	64.7217	122.064	32.4749	111.635	36.1816	8.08388	19.9202	1248.15	14.3849	-26.1671	40.552	6.10521	-16.0786
4791	-8.2901e+06	7.65201e+06	0.182125	-0.0735498	0.0630959	0.177601	-9.31551	7.99081	-23.2295	250.008	54.309	8.37305	65.1129	124.665	32.5847	117.483	36.1926	8.53289	20.1436	1310.14	14.618	-27.7095	42.3275	6.59691	-18.0848
4792	-8.1901e+06	7.65201e+06	0.170347	-0.0680595	0.0598167	0.18481	-9.5947	8.19458	-23.9575	251.489	55.1198	8.20616	65.6477	125.185	31.1803	121.038	35.5848	8.76789	20.1284	1350.35	14.8592	-28.7056	43.5648	7.14001	-18.1964
4793	-8.0901e+06	7.65201e+06	0.170347	-0.0680595	0.0598167	0.18481	-9.7545	8.36836	-24.3595	246.377	53.2556	8.23161	66.0445	123.005	29.4861	121.091	34.5124	8.90996	20.1212	1376.42	15.0157	-29.3159	44.3316	7.67436	-18.0648
4794	-7.9901e+06	7.65201e+06	0.170347	-0.0680595	0.0598167	0.18481	-9.92083	8.43859	-24.7896	234.351	48.7729	7.73669	65.4646	117.004	27.8209	116.484	33.3549	9.44879	20.8893	1397.33	15.1919	-30.0882	45.2801	8.17288	-18.0948
4795	-7.8901e+06	7.65201e+06	0.170347	-0.0680595	0.0598167	0.18481	-10.0596	8.36697	-25.1235	213.514	42.5845	6.89143	63.6331	105.908	25.4587	105.842	30.952	10.0833	21.8325	1407.08	15.3273	-30.9072	46.2344	8.29134	-17.8589
4796	-7.7901e+06	7.65201e+06	0.182203	-0.0745075	0.0563416	0.179022	-10.3031	8.18671	-25.555	186.498	36.4972	5.45692	62.9509	92.6399	21.564	92.5627	28.0373	10.2016	21.7969	1416.65	15.2626	-31.5721	46.8347	8.05027	-16.8623
4797	-7.6901e+06	7.65201e+06	0.182203	-0.0745075	0.0563416	0.179022	-10.6779	7.77351	-25.7939	169.972	34.0354	4.06088	65.2266	86.2504	18	86.0857	26.0893	9.97066	21.4355	1411.73	14.8137	-31.7607	46.5744	7.59964	-15.911
4798	-7.5901e+06	7.65201e+06	0.193211	-0.0804949	0.0531149	0.173647	-11.1071	7.59021	-26.3962	176.388	36.0482	4.05144	67.3694	90.0556	18.3289	89.8956	26.115	9.62014	20.7073	1428.57	14.589	-32.0284	46.6174	7.41878	-16.7341
4799	-7.4901e+06	7.65201e+06	0.206464	-0.0950809	0.0520274	0.145464	-11.1298	7.9874	-26.7495	197.169	40.1556	4.79679	67.3429	98.7943	20.8591	98.6696	27.7476	9.21648	19.6355	1461.61	14.944	-32.1401	47.0841	7.77731	-17.2594
4800	-7.3901e+06	7.65201e+06	0.2082	-0.111531	0.0625381	0.147876	-10.6458	8.36662	-25.811	228.457	44.8411	6.97347	64.1715	109.982	25.7445	108.983	29.8628	8.63835	18.7107	1442.71	15.2429	-30.9603	46.2032	7.38973	-20.387
4801	-7.2901e+06	7.65201e+06	0.2082	-0.111531	0.0625381	0.147876	-9.68769	9.56138	-25.2898	246.973	46.4583	8.27447	59.4965	113.693	28.4624	109.481	31.7109	8.35375	17.8199	1467.78	16.4664	-30.4514	46.9178	7.65692	-22.3599
4802	-7.1901e+06	7.65201e+06	0.188959	-0.0905143	0.073516	0.176205	-8.99972	10.6968	-25.7513	243.509	43.1585	8.31133	54.4379	107.441	28.4508	99.8948	34.0684	8.33262	17.5668	1526.87	17.5866	-31.4306	49.0172	8.67926	-21.4702
4803	-7.0901e+06	7.65201e+06	0.200644	-0.102601	0.0695358	0.155584	-8.86618	10.7386	-25.7799	222.917	38.5497	8.38709	51.3123	96.898	27.4615	88.9512	34.1296	8.29194	18.3277	1524.79	17.6403	-31.4743	49.1145	8.59048	-18.7467
4804	-6.9901e+06	7.65201e+06	0.201717	-0.0762927	0.0512349	0.157399	-9.17142	10.7551	-26.4132	195.617	34.9463	7.17111	53.9037	88.0263	23.1819	80.9011	30.7358	8.37179	16.9904	1552.83	17.8797	-31.6868	49.5664	8.51958	-16.7497
4805	-6.8901e+06	7.65201e+06	0.188432	-0.0665549	0.0473372	0.163949	-9.2767	10.6225	-26.6793	180.481	33.4723	5.78871	58.0552	84.8051	19.7154	76.2297	28.1295	8.25536	16.799	1555.97	17.6672	-31.5806	49.2478	8.36284	-14.687
4806	-6.7901e+06	7.65201e+06	0.188432	-0.0665549	0.0473372	0.163949	-9.49943	10.2803	-26.9052	181.04	33.7339	5.66164	59.5032	85.9507	19.6757	75.9206	27.8971	8.03341	16.4254	1548.56	17.1019	-31.7989	48.9007	8.06882	-14.2163
4807	-6.6901e+06	7.65201e+06	0.188432	-0.0665549	0.0473372	0.163949	-9.69763	9.74942	-26.6903	196.835	35.1155	7.12532	55.6303	89.5896	24.9278	77.7749	29.8544	7.78447	16.2369	1518.05	16.3838	-31.578	47.9618	7.04551	-16.6209
4808	-6.5901e+06	7.65201e+06	0.208025	-0.0524549	0.0436816	0.1793	-9.77697	8.95486	-25.8929	219.404	37.5859	9.1499	51.3307	96.6963	30.7743	83.1091	32.4466	7.61374	16.5046	1450.88	15.5723	-30.6073	46.1796	4.81313	-22.1531
4809	-6.4901e+06	7.65201e+06	0.232411	-0.0976076	0.0528129	0.188134	-9.96275	8.01137	-25.3638	227.059	40.3006	8.91606	54.3154	103.967	29.4788	90.8159	31.1331	7.5668	16.9426	1387.3	14.6587	-30.0242	44.6828	5.2474	-24.3651
4810	-6.3901e+06	7.65201e+06	0.232411	-0.0976076	0.0528129	0.188134	-10.4028	7.34046	-25.5736	222.311	41.7887	7.7799	60.7378	108.254	25.6494	95.9031	26.9287	7.50662	16.9793	1371.35	13.9495	-30.2804	44.2299	5.7187	-24.8877
4811	-6.2901e+06	7.65201e+06	0.232411	-0.0976076	0.0528129	0.188134	-10.6274	7.47111	-26.2054	214.122	40.869	7.06515	64.2274	107.704	23.0768	94.1939	23.696	7.59015	16.9208	1407.7	14.1515	-31.0576	45.2091	6.26875	-25.8012
4812	-6.1901e+06	7.65201e+06	0.212563	-0.0864885	0.0594915	0.200411	-10.5336	7.59533	-26.413	203.42	37.8288	6.49177	64.2761	102.399	21.0823	85.7499	21.4311	7.69671	18.5944	1426.69	14.2541	-31.3703	45.6244	6.61252	-26.0034
4813	-6.0901e+06	7.65201e+06	0.212563	-0.0864885	0.0594915	0.200411	-10.8927	7.14101	-27.0154	177.503	32.5766	5.51989	64.1012	88.0927	18.2812	73.2743	18.7393	7.52009	18.8524	1438.22	13.481	-31.9349	45.4159	6.38628	-26.0185
4814	-5.9901e+06	7.65201e+06	0.227521	-0.0988945	0.0649828	0.191567	-11.4516	6.80759	-27.7783	143.557	28.0004	4.1617	68.6353	73.7415	13.4906	64.4014	13.8638	7.18121	16.1942	1456	12.8786	-32.6417	45.5203	6.03574	-26.9327
4815	-5.8901e+06	7.65201e+06	0.227521	-0.0988945	0.0649828	0.191567	-11.9817	6.78131	-28.4463	134.045	26.9111	3.67069	70.785	70.4076	12.0061	61.7019	12.2151	6.97033	16.7879	1480.79	12.9981	-33.1759	46.174	5.91816	-28.1461
4816	-5.7901e+06	7.65201e+06	0.227521	-0.0988945	0.0649828	0.191567	NA	NA	NA	NA	NA	NA	NA	NA	NA	NA	NA	NA	NA	NA	NA	NA	NA	NA	NA
4817	-5.6901e+06	7.65201e+06	0.227521	-0.0988945	0.0649828	0.191567	-13.233	7.17437	-30.9045	138.307	27.4272	4.105	66.046	69.8513	13.0491	62.565	13.1819	7.18994	14.4535	1595.73	14.1043	-35.6391	49.7434	6.09187	-30.8242
4818	-5.5901e+06	7.65201e+06	0.207296	-0.0878744	0.0725975	0.204108	-13.2764	6.8935	-30.7827	138.889	27.4031	4.14754	63.7986	68.7161	13.2833	61.4011	13.3674	7.18627	14.8586	1578.04	13.807	-35.5499	49.3569	5.80836	-30.7117
4821	-5.2901e+06	7.65201e+06	0.207296	-0.0878744	0.0725975	0.204108	NA	NA	NA	NA	NA	NA	NA	NA	NA	NA	NA	NA	NA	NA	NA	NA	NA	NA	NA
4822	-5.1901e+06	7.65201e+06	0.207296	-0.0878744	0.0725975	0.204108	-14.0776	5.31332	-31.755	133.125	28.5157	2.67902	74.1302	72.8335	9.5386	63.3537	9.7734	7.20334	15.277	1553.94	12.1316	-36.8629	48.9945	4.69714	-31.724
4823	-5.0901e+06	7.65201e+06	0.207296	-0.0878744	0.0725975	0.204108	-14.0229	5.21838	-31.5316	146.504	30.7802	3.53283	69.7989	76.8035	11.859	67.9586	12.5756	6.96316	14.6073	1537.79	12.2082	-36.5177	48.7259	4.60112	-31.4017
4824	-4.9901e+06	7.65201e+06	0.207296	-0.0878744	0.0725975	0.204108	NA	NA	NA	NA	NA	NA	NA	NA	NA	NA	NA	NA	NA	NA	NA	NA	NA	NA	NA
4825	-4.8901e+06	7.65201e+06	0.189406	-0.0735163	0.0672831	0.214734	-14.43	5.56973	-32.5419	214.849	41.7869	5.70812	60.3827	101.905	20.2375	91.7003	20.5531	7.1041	14.0239	1587.14	12.9352	-37.717	50.6522	4.78176	-32.4861
4826	-4.7901e+06	7.65201e+06	0.181565	-0.0599571	0.0942823	0.23698	NA	NA	NA	NA	NA	NA	NA	NA	NA	NA	NA	NA	NA	NA	NA	NA	NA	NA	NA
4827	-4.6901e+06	7.65201e+06	0.181565	-0.0599571	0.0942823	0.23698	-13.4414	4.59782	-30.1756	225.726	45.334	5.3739	64.2505	110.22	19.8448	95.3479	19.8523	6.2557	14.376	1445.98	11.0722	-34.7806	45.8529	4.03167	-30.1733
4828	-4.5901e+06	7.65201e+06	0.181565	-0.0599571	0.0942823	0.23698	NA	NA	NA	NA	NA	NA	NA	NA	NA	NA	NA	NA	NA	NA	NA	NA	NA	NA	NA
4829	-4.4901e+06	7.65201e+06	0.150886	-0.044323	0.0888748	0.261662	-13.7699	4.44964	-30.3726	224.518	43.68	4.97491	63.6195	108.01	18.6304	95.1597	18.9698	6.3889	13.7637	1447.62	11.3009	-35.153	46.4539	3.85407	-30.2623
4830	-4.3901e+06	7.65201e+06	0.150886	-0.044323	0.0888748	0.261662	-13.2241	4.52195	-29.6727	231.065	43.24	5.46431	58.2206	105.693	21.3273	93.7956	21.8195	6.38163	14.1083	1422.13	11.0358	-34.4312	45.4669	4.00345	-29.5123
4831	-4.2901e+06	7.65201e+06	0.150886	-0.044323	0.0888748	0.261662	NA	NA	NA	NA	NA	NA	NA	NA	NA	NA	NA	NA	NA	NA	NA	NA	NA	NA	NA
4832	-4.1901e+06	7.65201e+06	0.175531	-0.0639456	0.0931925	0.244838	-11.6313	4.02115	-27.0251	204.632	41.9412	4.59964	68.7423	103.062	18.5463	89.8521	18.5639	6.20245	15.8736	1294.75	9.53866	-31.6523	41.1909	3.44563	-27.0153
4882	809904	7.65201e+06	0.052982	-0.0563154	-0.00503686	0.170895	3.41554	10.7683	-2.51632	1262.78	167.178	63.052	29.4852	427.686	207.835	236.861	354.67	4.80104	24.3484	553.85	14.4676	-5.30554	19.7732	0.998207	6.187
4883	909904	7.65201e+06	0.0504575	-0.0494389	0.00146666	0.196332	1.01659	9.8632	-6.2016	998.892	124.155	51.879	26.2255	320.896	166.096	224.503	285.653	5.67098	23.6778	665.272	14.3292	-9.63601	23.9652	1.30937	2.43436
4884	1.0099e+06	7.65201e+06	0.0185035	-0.0449208	0.0128558	0.197553	-1.38503	9.18033	-10.2338	651.479	87.0043	33.8099	30.7599	221.743	108.603	206.654	154.795	7.42133	24.903	796.929	14.9799	-14.7679	29.7478	7.18764	-4.28234
4885	1.1099e+06	7.65201e+06	0.1017	-0.0588831	0.0217288	0.197853	-2.06419	9.9522	-12.5546	511.691	82.8231	24.7463	40.416	201.079	80.2784	200.807	94.5423	8.58311	25.0322	917.513	16.2784	-17.9888	34.2671	9.87399	-8.5001
4886	1.2099e+06	7.65201e+06	0.108948	-0.0657074	0.0112522	0.18836	-2.17613	10.6976	-13.6481	469.6	75.8108	22.6759	43.8672	192.509	71.9706	192.486	77.4607	8.8606	24.2186	988.387	17.1777	-19.3788	36.5565	10.6795	-9.00872
4887	1.3099e+06	7.65201e+06	0.0797116	-0.0575074	0.011957	0.182837	-2.23834	10.9679	-14.3298	486.653	82.381	22.2883	48.8132	211.896	70.0871	211.891	76.2877	9.33292	24.2727	1022.76	17.7978	-20.6489	38.4467	10.9643	-9.60653
4888	1.4099e+06	7.65201e+06	0.0585051	-0.0598846	0.0126197	0.177349	-1.60151	11.171	-13.4367	475.995	71.532	21.7085	42.428	191.496	70.1145	191.496	76.3084	8.77816	23.5703	992.355	17.8641	-19.3569	37.221	11.1709	-10.3665
4889	1.5099e+06	7.65201e+06	0.0422674	-0.0513883	0.00798644	0.183407	-1.07757	11.3331	-12.47	494.947	67.861	25.1173	36.7753	190	78.1629	190	86.2264	8.18035	22.8492	960.799	17.8119	-17.9509	35.7628	11.3331	-7.83423
4890	1.6099e+06	7.65201e+06	0.0422674	-0.0513883	0.00798644	0.183407	-0.654421	10.9042	-11.3242	520.192	71.2081	26.0335	35.9775	196.98	80.8309	196.979	91.5266	7.23172	22.0616	899.606	16.8151	-15.9394	32.7545	10.904	-6.88467
4891	1.7099e+06	7.65201e+06	0.0569198	-0.0692827	0.0247146	0.194017	-0.552335	10.786	-11.0573	501.447	69.2965	23.7118	37.2158	189.843	75.2244	189.687	86.3789	6.95943	21.343	888.27	16.7444	-15.8251	32.5695	10.7401	-6.98512
4892	1.8099e+06	7.65201e+06	0.0514438	-0.0484913	0.0317005	0.222807	-0.960684	10.3219	-11.2438	509.846	67.7779	23.5626	36.0997	187.41	77.121	186.435	86.1578	6.69561	20.6788	880.626	16.2747	-16.1466	32.4214	10.0793	-7.91526
4893	1.9099e+06	7.65201e+06	0.0546561	-0.0823046	0.0153846	0.176925	-1.01561	9.82441	-10.5066	502.284	64.1744	24.5697	33.2903	179.683	79.4995	179.504	86.2188	6.82368	22.1757	834.5	15.4357	-15.253	30.6887	9.78012	-8.00185
4894	2.0099e+06	7.65201e+06	0.0546561	-0.0823046	0.0153846	0.176925	-0.999198	9.22566	-9.9712	500.146	62.2708	25.8118	30.208	172.339	81.9185	172.112	91.7004	6.17632	21.4219	791.932	14.3166	-14.4341	28.7507	8.9855	-7.31095
4895	2.1099e+06	7.65201e+06	0.0870688	-0.0795857	0.0152015	0.190018	NA	NA	NA	NA	NA	NA	NA	NA	NA	NA	NA	NA	NA	NA	NA	NA	NA	NA	NA
4896	2.2099e+06	7.65201e+06	0.0870688	-0.0795857	0.0152015	0.190018	NA	NA	NA	NA	NA	NA	NA	NA	NA	NA	NA	NA	NA	NA	NA	NA	NA	NA	NA
4897	2.3099e+06	7.65201e+06	0.0816646	-0.068288	0.031058	0.200496	-1.53162	8.0593	-10.2161	420.47	52.3666	22.8197	28.2478	148.756	72.2181	129.584	83.3771	5.66435	20.2579	754.699	13.2833	-14.6663	27.9495	5.07513	-7.05402
4898	2.4099e+06	7.65201e+06	0.0921212	-0.0853965	0.0591423	0.217225	-1.83045	8.20743	-11.036	415.58	52.8019	21.8525	31.3772	153.349	68.9002	132.046	76.6	6.03809	20.7076	796.448	13.5012	-15.7026	29.2038	5.08536	-8.92961
4899	2.5099e+06	7.65201e+06	0.0921212	-0.0853965	0.0591423	0.217225	NA	NA	NA	NA	NA	NA	NA	NA	NA	NA	NA	NA	NA	NA	NA	NA	NA	NA	NA
4901	2.7099e+06	7.65201e+06	0.0733889	-0.0808325	0.0274425	0.180715	NA	NA	NA	NA	NA	NA	NA	NA	NA	NA	NA	NA	NA	NA	NA	NA	NA	NA	NA
4902	2.8099e+06	7.65201e+06	0.0840349	-0.0882975	0.0139083	0.169626	-4.02391	8.51278	-15.3941	414.783	53.9175	20.937	32.3096	151.541	66.5141	146.052	76.7198	6.90463	19.2812	990.56	14.6086	-21.1508	35.7594	8.35393	-13.0332
4903	2.9099e+06	7.65201e+06	0.0840349	-0.0882975	0.0139083	0.169626	NA	NA	NA	NA	NA	NA	NA	NA	NA	NA	NA	NA	NA	NA	NA	NA	NA	NA	NA
4904	3.0099e+06	7.65201e+06	0.0948257	-0.0913564	0.0330027	0.172248	-4.97045	8.46635	-17.0921	418.748	53.3249	20.7478	30.6412	150.142	66.7075	144.016	89.5187	7.20517	19.2445	1060.45	14.7849	-22.6601	37.445	8.369	-13.6522
4905	3.1099e+06	7.65201e+06	0.0439568	-0.0849388	0.0364266	0.171609	-5.50076	8.19617	-17.9498	407.522	53.0844	19.4888	32.6973	148.703	63.0445	140.393	83.3702	7.47885	19.2357	1085.1	15.2585	-23.6177	38.8762	7.98625	-14.5075
4906	3.2099e+06	7.65201e+06	0.0863796	-0.0986805	0.0384026	0.156155	-6.10727	8.24518	-19.1355	431.802	54.6478	20.994	31.3844	153.948	69.4601	144.813	87.9793	8.02056	19.3051	1129.7	16.3238	-25.2052	41.529	7.49773	-14.6312
4907	3.3099e+06	7.65201e+06	0.0863796	-0.0986805	0.0384026	0.156155	-6.45336	8.12482	-19.6105	483.948	58.204	24.4451	27.8474	165.207	81.8135	157.508	102.129	7.91983	19.134	1143.65	16.0231	-25.3383	41.3614	7.76253	-15.001
4908	3.4099e+06	7.65201e+06	0.0863796	-0.0986805	0.0384026	0.156155	-6.51914	8.12476	-19.6625	517.038	64.0987	26.3818	28.5572	178.527	86.4907	169.918	106.893	7.75703	19.0709	1146.96	15.5344	-25.1119	40.6462	7.88537	-15.5714
4909	3.5099e+06	7.65201e+06	0.104303	-0.106958	0.0427064	0.149959	-6.81345	7.79828	-19.6072	478.237	65.424	23.828	33.6122	174.869	76.6213	167.305	89.8807	7.44463	18.6375	1135.92	14.9172	-24.9939	39.9111	7.50817	-16.2432
4910	3.6099e+06	7.65201e+06	0.108784	-0.112724	0.0651884	0.157661	NA	NA	NA	NA	NA	NA	NA	NA	NA	NA	NA	NA	NA	NA	NA	NA	NA	NA	NA
4911	3.7099e+06	7.65201e+06	0.0692326	-0.0984268	0.0572375	0.173731	-7.91066	8.21144	-22.1463	339.643	51.2399	17.1931	34.6041	125.792	55.7621	122.7	63.1687	7.26329	17.2349	1266.95	15.1757	-27.6685	42.8442	8.06657	-19.7837
4912	3.8099e+06	7.65201e+06	0.0995272	-0.097216	0.0586925	0.182472	-8.52976	8.30489	-23.5453	337.276	50.3698	18.2406	32.4982	122.545	57.9765	120.238	64.8602	7.37893	16.7258	1324.27	15.0468	-29.0655	44.1123	7.40986	-21.9096
4913	3.9099e+06	7.65201e+06	0.121992	-0.116411	0.0379797	0.146808	-9.05845	8.27101	-24.5453	333.47	50.6777	17.7756	34.5843	124.239	56.4918	122.221	62.768	7.43629	16.6061	1361.61	14.6577	-30.1176	44.7753	6.19711	-22.703
4914	4.0099e+06	7.65201e+06	0.0893596	-0.101911	0.0592094	0.165249	-9.55151	8.68073	-25.6325	328.319	53.3497	15.716	42.3633	132.226	50.0151	126.128	55.1906	7.7462	16.4013	1426.74	15.9593	-31.2825	47.2418	8.38962	-23.3412
4915	4.1099e+06	7.65201e+06	0.0893596	-0.101911	0.0592094	0.165249	NA	NA	NA	NA	NA	NA	NA	NA	NA	NA	NA	NA	NA	NA	NA	NA	NA	NA	NA
4916	4.2099e+06	7.65201e+06	0.0875952	-0.0961333	0.0478203	0.179222	-9.55759	9.69667	-26.2579	396.771	57.3352	20.7554	34.6792	145.541	64.3676	141.41	76.7071	7.72113	15.6146	1489.76	17.7425	-31.7083	49.4508	8.17136	-21.0415
4917	4.3099e+06	7.65201e+06	0.0790665	-0.10657	0.0512449	0.163111	-9.44205	10.0929	-26.283	429.168	57.8944	22.8292	31.0414	150.687	71.0768	145.292	86.1504	7.77445	15.5454	1504.87	18.2129	-31.7976	50.0105	5.61513	-20.297
4918	4.4099e+06	7.65201e+06	0.0565411	-0.0805188	0.0193635	0.133703	-9.46522	10.352	-26.5232	453.042	58.5718	23.8064	29.9582	156.927	74.8214	148.514	92.214	8.11531	15.9609	1523.68	18.657	-32.1816	50.8386	2.96587	-19.2402
4919	4.5099e+06	7.65201e+06	0.0851991	-0.0782252	0.00712108	0.125992	-9.47696	10.5479	-26.7146	480.348	59.6841	24.7243	29.6129	165.056	78.4947	153.589	99.8346	8.36565	16.3193	1539.09	18.9463	-32.2981	51.2444	2.06168	-17.2647
4920	4.6099e+06	7.65201e+06	0.08317	-0.0547176	-0.00467412	0.168224	-9.63051	10.4005	-26.9537	498.93	61.2719	25.6896	30.0224	170.777	80.9101	161.32	103.109	8.14732	15.9815	1542.79	18.7384	-32.2001	50.9385	3.09976	-17.9098
4921	4.7099e+06	7.65201e+06	0.109671	-0.0697889	0.00450986	0.158331	-10.0427	10.0773	-27.7377	490.996	61.4695	25.2827	31.6087	170.741	78.3549	165.299	98.7032	8.07607	15.7081	1562.75	18.5105	-32.8963	51.4069	6.00019	-19.62
4922	4.8099e+06	7.65201e+06	0.13404	-0.083555	0.0301369	0.161891	-11.1687	8.98662	-28.7073	498.1	64.8925	24.0971	35.3027	181.652	75.1842	179.445	92.7576	8.43	16.2727	1558.18	17.7725	-34.0369	51.8093	7.90753	-22.9646
4923	4.9099e+06	7.65201e+06	0.154362	-0.072399	0.0277983	0.18842	-12.5928	7.7419	-30.1122	505.377	68.7713	22.4799	39.6469	194.212	71.5026	193.74	85.6705	8.8992	16.9145	1564.69	16.8373	-35.7711	52.6084	7.47445	-26.5755
4924	5.0099e+06	7.65201e+06	0.154362	-0.072399	0.0277983	0.18842	-13.4747	7.27707	-31.4374	488.466	69.7371	20.1756	43.4172	195.879	64.5732	195.804	76.0796	9.30867	17.2829	1598.53	16.4229	-37.4364	53.8593	7.22055	-29.0721
4925	5.1099e+06	7.65201e+06	0.154362	-0.072399	0.0277983	0.18842	-13.8938	7.33068	-32.3626	453.589	68.1785	17.6593	46.425	187.515	56.7252	187.51	66.0209	9.60012	17.4695	1636.6	16.4066	-38.5454	54.952	7.32263	-30.4937
4926	5.2099e+06	7.65201e+06	0.141002	-0.0666431	0.0229759	0.19635	-13.733	8.21654	-33.1693	395.544	63.7147	14.1885	50.3329	169.891	46.6144	169.891	53.5184	9.98681	17.5556	1701.6	17.2276	-39.6655	56.8931	8.21477	-31.0781
4927	5.3099e+06	7.65201e+06	0.154067	-0.0748794	0.0272109	0.189562	-13.3428	9.36118	-33.8081	334.633	58.8824	10.4029	56.5384	151.768	35.6037	151.747	40.1975	10.3278	17.5455	1770.68	18.2045	-40.6792	58.8837	9.32414	-31.4341
4928	5.4099e+06	7.65201e+06	0.141002	-0.0666431	0.0229759	0.19635	-12.8034	10.562	-34.356	276.472	53.6204	7.26017	63.5046	133.514	25.8558	133.507	28.9494	10.6071	17.4522	1839.81	19.1425	-41.6419	60.7844	10.5482	-31.5967
4929	5.5099e+06	7.65201e+06	0.141002	-0.0666431	0.0229759	0.19635	-12.6156	10.8845	-34.6476	256.275	50.7105	6.42521	65.1266	125.876	22.848	125.876	25.6978	10.6046	17.2636	1866.57	19.3192	-42.0723	61.3915	10.8845	-31.7648
4930	5.6099e+06	7.65201e+06	0.126849	-0.0577204	0.018388	0.203705	-12.7303	10.5697	-34.77	263.3	49.9811	6.77034	63.0131	127.36	23.882	127.36	27.5395	10.4261	17.0766	1861.75	18.9693	-42.0382	61.0075	10.5697	-31.9183
4931	5.7099e+06	7.65201e+06	0.153063	-0.055003	0.0178377	0.211849	-12.8268	10.397	-34.9471	271.541	49.4789	7.20497	61.6704	130.488	24.9415	130.488	29.449	10.1779	16.717	1864.49	18.7871	-42.0324	60.8196	10.397	-32.0894
4932	5.8099e+06	7.65201e+06	0.153063	-0.055003	0.0178377	0.211849	-12.6996	10.5807	-34.9329	277.976	49.5235	7.10911	61.4876	133.607	25.0189	133.607	30.8121	9.7794	16.0873	1871.84	18.9384	-41.7772	60.7156	10.5807	-31.9143
4933	5.9099e+06	7.65201e+06	0.153063	-0.055003	0.0178377	0.211849	-12.605	10.96	-35.0846	283.334	50.3387	7.0821	61.4249	136.098	25.2899	136.098	31.2895	9.5459	15.5973	1892.96	19.4434	-41.7164	61.1598	10.96	-31.7929
4934	6.0099e+06	7.65201e+06	0.153063	-0.055003	0.0178377	0.211849	-12.8839	11.1646	-36.0393	279.515	49.8863	6.94462	61.5168	133.672	24.2742	133.672	29.8464	9.95753	15.8792	1941.8	19.9501	-42.7058	62.6559	11.1646	-32.4204
4935	6.1099e+06	7.65201e+06	0.153063	-0.055003	0.0178377	0.211849	-13.5412	11.1728	-37.646	265.625	46.9695	7.2565	60.0976	125.186	24.0506	125.183	28.5977	10.7531	16.5658	2010.52	20.3575	-44.5256	64.8831	11.1684	-33.8039
4936	6.2099e+06	7.65201e+06	0.151753	-0.0632398	0.0423577	0.216978	-13.9348	11.2847	-38.8047	255.587	43.2128	7.8275	56.553	115.764	25.4716	115.689	29.1754	11.028	16.6063	2064.55	20.6116	-45.7696	66.3812	11.1794	-34.8011
4937	6.3099e+06	7.65201e+06	0.135724	-0.0559513	0.0373101	0.227779	-13.8727	11.3157	-38.8041	256.578	41.4809	7.96756	54.4939	111.958	26.0862	111.588	30.5538	10.608	16.0834	2066.53	20.3986	-45.4569	65.8555	10.9147	-34.7395
4938	6.4099e+06	7.65201e+06	0.135724	-0.0559513	0.0373101	0.227779	-13.3973	11.4731	-37.9965	264.129	42.349	7.89074	54.8823	114.1	25.896	113.354	31.6879	9.89447	15.3577	2039.52	20.2115	-44.1145	64.326	10.6781	-33.8806
4939	6.5099e+06	7.65201e+06	0.163941	-0.0526721	0.0335069	0.20547	-12.8019	11.734	-36.9884	282.75	45.1476	8.82679	54.9415	121.268	28.3377	120.417	33.6317	9.36113	14.89	2010.31	20.0865	-42.7564	62.843	10.5145	-32.8833
4940	6.6099e+06	7.65201e+06	0.18928	-0.0709213	0.0414732	0.19062	-12.7158	11.3959	-36.0327	315.104	50.5997	10.3131	55.083	136.828	32.9337	136.207	37.9436	9.3395	15.2513	1962.18	19.491	-41.8643	61.3553	10.2038	-32.0748
4941	6.7099e+06	7.65201e+06	0.188974	-0.0735009	0.0408623	0.191807	-13.3305	10.2004	-35.2601	348.11	57.8809	11.1685	56.5625	157.481	36.8257	157.296	43.7174	9.76211	16.4477	1888.41	18.2689	-41.3039	59.5728	9.79936	-31.4402
4942	6.8099e+06	7.65201e+06	0.19019	-0.0765482	0.0254311	0.184529	-14.3021	8.85928	-35.3376	360.053	62.3184	11.0769	58.8009	170.408	37.9476	170.398	46.9835	10.2556	17.6209	1843.1	17.0502	-41.2706	58.3208	8.83312	-30.9807
4943	6.9099e+06	7.65201e+06	0.17857	-0.0683786	0.0211249	0.191116	-14.9207	8.89222	-36.8658	325.688	58.6076	9.30933	61.8084	160.161	33.7594	160.16	43.7343	10.7326	17.9707	1910.42	17.3154	-42.4914	59.8069	8.89181	-30.7864
4944	7.0099e+06	7.65201e+06	0.184039	-0.0672988	-0.00954574	0.179233	-15.0788	10.0123	-38.9622	266.904	50.7503	6.58537	66.2276	136.884	25.6842	136.884	35.1155	11.0731	17.5744	2044.8	18.6543	-44.46	63.1143	10.0123	-30.5936
4945	7.1099e+06	7.65201e+06	0.175422	-0.0573877	-0.0184893	0.1733	-15.1015	10.784	-39.9023	227.174	46.3594	4.8235	71.4856	122.362	19.714	122.362	27.3436	11.125	17.1292	2117.1	19.5909	-45.3645	64.9555	10.784	-31.4975
4946	7.2099e+06	7.65201e+06	0.196475	-0.0727946	-0.00803587	0.162717	-15.0999	10.699	-39.3311	225.18	48.2603	4.76315	75.5837	125.044	18.5309	125.044	23.6973	10.9731	17.0657	2091.27	19.5372	-44.7551	64.2923	10.699	-34.6454
4947	7.3099e+06	7.65201e+06	0.196475	-0.0727946	-0.00803587	0.162717	-15.1258	10.0488	-38.0324	243.317	53.9323	5.15101	79.4937	138.451	19.2241	138.451	23.2474	10.7382	17.2835	2012.19	18.7931	-43.3422	62.1353	10.0488	-34.3596
4948	7.4099e+06	7.65201e+06	0.167728	-0.0556351	0.00692302	0.193281	-14.9018	9.85886	-37.3198	249.853	56.0084	4.91618	81.7499	144.069	18.6871	144.069	23.4256	10.522	17.2797	1973.03	18.3222	-42.5555	60.8777	9.85886	-32.2674
4949	7.5099e+06	7.65201e+06	0.187333	-0.0601582	0.00135097	0.190158	-14.4406	10.1159	-36.9649	245.79	53.5955	4.84223	79.3531	139.157	18.7714	139.157	25.3325	10.2418	16.9763	1964.42	18.2032	-42.1111	60.3143	10.1159	-29.5283
4950	7.6099e+06	7.65201e+06	0.192836	-0.0669529	0.0136382	0.176501	-13.5853	11.1869	-37.0724	229.808	46.6325	5.13261	72.4319	122.289	19.4625	122.289	28.2167	10.0456	16.3815	2005.81	18.9671	-42.2787	61.2458	11.1869	-26.6979
4951	7.7099e+06	7.65201e+06	0.192836	-0.0669529	0.0136382	0.176501	-13.1335	11.4603	-36.5384	226.838	42.7444	5.60284	65.363	113.023	21.154	113.022	32.4787	9.6975	15.9691	1992.19	19.0343	-41.5982	60.6326	11.4585	-24.8493
4952	7.8099e+06	7.65201e+06	0.180321	-0.0576558	0.00844479	0.183312	-13.0712	11.0506	-35.7376	225.917	40.7226	5.6577	60.8768	107.866	21.834	107.831	35.2239	9.38336	15.8762	1943.92	18.5046	-40.5292	59.0338	10.9853	-23.4727
4953	7.9099e+06	7.65201e+06	0.193156	-0.0642659	0.0142745	0.175264	-13.2196	10.3871	-35.0361	222.156	38.9834	5.61456	58.0725	103.434	22.2033	103.158	36.0609	9.10202	15.865	1891.75	17.7744	-39.5363	57.3106	9.93072	-21.1938
4954	8.0099e+06	7.65201e+06	0.186639	-0.081036	0.0114205	0.176003	-13.3386	9.89171	-34.528	216.936	37.2076	5.60277	55.8944	99.3161	22.3991	98.4368	36.2846	8.86222	15.8124	1854.85	17.2292	-38.7793	56.0085	8.55083	-18.6556
4955	8.1099e+06	7.65201e+06	0.180053	-0.0699751	0.01369	0.197183	-13.3479	9.71695	-34.3168	209.405	35.5038	5.67456	54.3043	94.707	22.3805	93.4362	35.9357	8.73178	15.7397	1840.92	17.0181	-38.4471	55.4652	7.88099	-18.2013
4956	8.2099e+06	7.65201e+06	0.206879	-0.0846961	0.0199736	0.172569	-13.2821	9.65763	-34.1978	200.484	34.4979	5.48797	54.6	90.894	21.3324	89.2925	34.5013	8.68094	15.7199	1832.92	16.8707	-38.3304	55.2012	7.60455	-18.2952
4957	8.3099e+06	7.65201e+06	0.197417	-0.0730573	0.00635606	0.163856	-13.1626	9.51907	-33.8897	191.172	34.0875	5.4238	55.9104	87.871	20.3435	86.002	32.3953	8.59714	15.7037	1813.32	16.6147	-38.0789	54.6936	7.44929	-18.0654
4958	8.4099e+06	7.65201e+06	0.205734	-0.0674702	-0.0108785	0.151829	-12.8959	9.49847	-33.3952	183.618	33.8693	5.57922	57.582	86.5276	19.9098	83.2844	29.7334	8.60159	15.8394	1789.37	16.5918	-37.701	54.2928	7.2768	-17.6538
4959	8.5099e+06	7.65201e+06	0.215374	-0.080599	0.0102405	0.149275	-12.6647	9.39875	-32.8236	182.081	33.9592	5.85401	58.1455	86.923	20.3446	82.6533	28.5346	8.80245	16.3279	1759.37	16.6993	-37.2804	53.9797	7.01766	-18.5447
4960	8.6099e+06	7.65201e+06	0.201358	-0.0848056	0.0196385	0.15802	-12.6789	9.02633	-32.3276	185.283	34.1862	6.12426	57.0942	87.6429	21.2349	83.2852	29.3006	9.06081	16.9997	1724.98	16.4835	-36.929	53.4125	6.73108	-19.2844
4961	8.7099e+06	7.65201e+06	0.220526	-0.100982	0.0376831	0.160443	-12.8343	8.56187	-31.9508	190.774	34.3353	6.46624	54.6808	88.0481	22.4143	83.9404	31.7312	9.27795	17.6579	1694.02	16.0104	-36.6294	52.6398	6.34883	-19.4654
4962	8.8099e+06	7.65201e+06	0.184514	-0.0782175	0.0443852	0.186078	-13.0776	7.99145	-31.4186	199.862	35.235	6.97012	52.33	89.6057	24.1022	86.4084	34.9923	9.33116	18.1617	1653.57	15.3619	-36.041	51.4029	5.97908	-19.1998
4963	8.9099e+06	7.65201e+06	0.157825	-0.0768684	0.0262176	0.16841	-13.0678	7.63363	-30.6267	208.108	36.2644	7.40776	51.228	91.6657	25.613	88.9885	37.2221	9.14762	18.2159	1609.42	14.8772	-35.2795	50.1567	6.01326	-19.1152
4964	9.0099e+06	7.65201e+06	0.157825	-0.0768684	0.0262176	0.16841	-12.5709	7.85932	-29.7206	214.5	36.5968	7.92163	50.0489	92.8776	27.2598	89.5054	38.467	8.88871	17.9107	1580.98	14.978	-34.5917	49.5696	6.26424	-17.695
4965	9.1099e+06	7.65201e+06	0.166421	-0.0958232	0.0417039	0.171937	-12.1964	7.75434	-28.7419	228.248	38.8043	8.60313	50.27	99.0217	29.6937	94.7429	39.6235	8.69795	17.9345	1533.92	14.7332	-33.7231	48.4563	5.9837	-17.7665
4966	9.2099e+06	7.65201e+06	0.172986	-0.109065	0.0405015	0.147684	-12.1706	6.95458	-27.7843	247.333	42.2226	9.50738	50.6256	107.854	32.7581	103.433	41.0032	8.35675	17.9845	1460.65	13.7013	-32.6755	46.3769	4.99411	-19.0705
4967	9.3099e+06	7.65201e+06	0.157969	-0.103958	0.0353655	0.155185	-12.5711	5.61549	-27.2046	267.703	45.4114	10.7688	50.1541	116.581	35.996	112.243	43.028	7.85562	17.8513	1384.77	12.0006	-31.8708	43.8714	3.77551	-20.03
4968	9.4099e+06	7.65201e+06	0.122172	-0.0990798	0.0477824	0.157393	-12.7451	4.86386	-26.8861	279.189	46.6252	11.4526	48.9923	120.73	37.1988	115.186	45.5676	7.47204	17.5904	1343.15	10.9436	-31.4059	42.3495	3.26134	-19.9039
4969	9.5099e+06	7.65201e+06	0.114497	-0.0929004	0.0616569	0.166762	-12.9695	4.23964	-26.6258	300.561	49.273	12.2613	48.1224	129.272	39.201	122.824	49.7038	7.14038	17.2974	1307.61	10.1976	-31.001	41.1986	2.67374	-19.415
4970	9.6099e+06	7.65201e+06	0.126963	-0.0809445	0.0593892	0.183278	NA	NA	NA	NA	NA	NA	NA	NA	NA	NA	NA	NA	NA	NA	NA	NA	NA	NA	NA
4971	9.7099e+06	7.65201e+06	0.177287	-0.0953199	0.0892604	0.208315	NA	NA	NA	NA	NA	NA	NA	NA	NA	NA	NA	NA	NA	NA	NA	NA	NA	NA	NA
5135	-9.9901e+06	7.55201e+06	0.182631	-0.069964	0.0261778	0.174329	NA	NA	NA	NA	NA	NA	NA	NA	NA	NA	NA	NA	NA	NA	NA	NA	NA	NA	NA
5136	-9.8901e+06	7.55201e+06	0.182631	-0.069964	0.0261778	0.174329	NA	NA	NA	NA	NA	NA	NA	NA	NA	NA	NA	NA	NA	NA	NA	NA	NA	NA	NA
5137	-9.7901e+06	7.55201e+06	0.182631	-0.069964	0.0261778	0.174329	-9.47963	6.48499	-22.9741	410.778	56.0514	16.0195	37.453	153.342	55.7603	133.556	86.0417	6.88031	17.2708	1244.26	12.5199	-27.2991	39.819	5.14492	-14.3889
5138	-9.6901e+06	7.55201e+06	0.182631	-0.069964	0.0261778	0.174329	-9.12694	6.29679	-22.4683	383.355	54.1486	15.7936	38.7412	145.751	52.2018	126.095	74.1508	6.53157	16.9297	1215.38	11.9557	-26.5783	38.534	5.01037	-14.1174
5139	-9.5901e+06	7.55201e+06	0.175475	-0.0582176	0.0458613	0.190045	-8.79187	5.93729	-22.0313	351.601	52.0505	14.383	41.8039	138.454	46.6662	118.87	62.8903	6.15376	16.5361	1181.46	11.251	-25.9906	37.2417	5.0047	-14.4395
5140	-9.4901e+06	7.55201e+06	0.175475	-0.0582176	0.0458613	0.190045	NA	NA	NA	NA	NA	NA	NA	NA	NA	NA	NA	NA	NA	NA	NA	NA	NA	NA	NA
5144	-9.0901e+06	7.55201e+06	0.18693	-0.117403	0.0672195	0.173564	NA	NA	NA	NA	NA	NA	NA	NA	NA	NA	NA	NA	NA	NA	NA	NA	NA	NA	NA
5145	-8.9901e+06	7.55201e+06	0.155358	-0.117537	0.065497	0.16608	NA	NA	NA	NA	NA	NA	NA	NA	NA	NA	NA	NA	NA	NA	NA	NA	NA	NA	NA
5146	-8.8901e+06	7.55201e+06	0.153055	-0.0956013	0.0692556	0.20106	-5.09607	10.01	-17.7318	244.087	50.552	8.47758	63.4254	123.767	29.2376	102.253	37.0604	8.18962	20.545	1159.14	16.5062	-23.2719	39.7781	8.63735	-8.76091
5147	-8.7901e+06	7.55201e+06	0.160185	-0.0753949	0.0692687	0.192924	-5.13732	10.3499	-17.9223	248.57	52.6052	8.61295	64.7999	126.921	30.4326	109.54	37.142	8.50067	21.0643	1177.5	17.1786	-23.1292	40.3078	8.57873	-9.05276
5148	-8.6901e+06	7.55201e+06	0.167265	-0.0847535	0.0710589	0.183731	-5.58009	10.6399	-19.0478	261.732	56.4653	8.90216	65.26	132.609	33.0615	119.69	39.667	9.09036	21.7445	1235.7	17.7207	-23.9475	41.6683	8.544	-8.79175
5149	-8.5901e+06	7.55201e+06	0.171663	-0.0748186	0.063374	0.185452	-6.53696	10.3655	-20.66	289.717	62.8598	9.91563	64.8317	143.633	38.327	135.349	44.5365	9.46537	22.0313	1293.08	17.5258	-25.3634	42.8891	8.09831	-9.46854
5150	-8.4901e+06	7.55201e+06	0.180963	-0.0657245	0.055353	0.177125	-7.36425	9.86851	-21.7588	315.698	66.8551	11.1656	62.9069	152.125	42.0398	148.017	49.2988	9.66149	22.1113	1322.23	17.0142	-26.5914	43.6056	7.86155	-11.1166
5151	-8.3901e+06	7.55201e+06	0.187408	-0.0544904	0.0435545	0.170804	-7.57455	10.0151	-22.2647	322.447	65.5223	11.0447	61.4814	153.528	39.7164	151.885	50.4948	9.90386	22.1146	1350.99	17.2028	-27.4712	44.674	8.87562	-13.1995
5152	-8.2901e+06	7.55201e+06	0.165292	-0.0566814	0.0431375	0.165657	-7.46116	10.3558	-22.3037	309.934	59.8837	9.90214	60.7665	147.906	35.6323	147.635	47.6879	10.0428	22.063	1367.78	17.5929	-27.8189	45.4118	10.1407	-14.6185
5153	-8.1901e+06	7.55201e+06	0.165292	-0.0566814	0.0431375	0.165657	-7.47718	10.7272	-22.9302	282.789	51.8921	8.78891	59.3736	135.066	32.0617	134.922	42.6304	10.476	22.3203	1408.74	18.1942	-28.5502	46.7443	10.5298	-14.8172
5154	-8.0901e+06	7.55201e+06	0.175781	-0.0626644	0.040649	0.161234	-7.77698	10.9222	-24.1084	243.158	43.0172	7.60213	57.4595	115.572	28.473	114.926	37.1226	11.1749	22.8283	1464.26	18.7077	-30.0162	48.7239	10.2402	-14.0381
5155	-7.9901e+06	7.55201e+06	0.185614	-0.0682735	0.0383159	0.157087	-7.87942	11.2505	-24.9763	198.08	35.4996	5.03524	59.6671	95.8989	21.4541	95.2783	31.7571	11.6661	22.979	1511.65	19.2282	-31.4824	50.7106	10.486	-12.6632
5156	-7.8901e+06	7.55201e+06	0.186248	-0.068014	0.0387081	0.159026	-8.23278	11.0004	-25.3798	183.192	34.0966	3.93013	63.2804	91.4938	18.0607	91.4018	29.2781	11.4595	22.4815	1517.21	18.9051	-32.0914	50.9965	10.8152	-12.4048
5157	-7.7901e+06	7.55201e+06	0.189773	-0.0849156	0.0518296	0.159839	-8.79466	10.7495	-26.1127	204.308	38.2205	5.00281	63.7104	101.92	20.666	101.919	31.4399	11.0721	21.6249	1537.01	18.5529	-32.6737	51.2265	10.7487	-15.1424
5158	-7.6901e+06	7.55201e+06	0.211252	-0.0837768	0.0525001	0.164466	-9.11962	10.7653	-26.4963	245.358	44.4507	7.56553	59.6812	116.647	28.2648	116.647	36.7842	10.5644	20.6462	1555.45	18.4336	-32.7642	51.1978	10.7652	-18.7361
5159	-7.5901e+06	7.55201e+06	0.211252	-0.0837768	0.0525001	0.164466	-8.87651	11.161	-26.2514	276.241	48.0236	9.75636	54.4977	122.949	34.9278	122.827	41.8874	9.88821	19.5055	1562.89	18.5796	-32.1141	50.6937	10.9963	-19.973
5160	-7.4901e+06	7.55201e+06	0.211847	-0.0988479	0.0566363	0.151831	-8.48771	11.2452	-25.3581	295.74	48.1732	11.7471	48.8129	123.206	40.8912	121.962	46.7041	9.25722	18.7523	1530.36	18.4245	-30.916	49.3405	9.72533	-19.7406
5161	-7.3901e+06	7.55201e+06	0.201625	-0.0968167	0.0599418	0.157449	-8.08835	11.7967	-25.3598	294.132	44.7696	12.7559	43.3334	116.041	43.2772	112.794	49.1087	9.23867	18.4694	1547.04	19.0584	-30.9079	49.9663	8.41418	-18.9098
5162	-7.2901e+06	7.55201e+06	0.249417	-0.0742143	0.0460148	0.167299	-7.74848	12.4189	-25.8066	263.258	40.5906	10.0782	44.4667	105.469	35.2903	101.791	46.3607	9.54725	18.6074	1585.25	19.8527	-31.4003	51.2529	9.36131	-16.4908
5163	-7.1901e+06	7.55201e+06	0.229651	-0.0575322	0.0533198	0.177627	-7.81545	12.4388	-26.0977	239.356	38.198	8.44349	47.4404	99.9419	28.9149	95.9191	43.7131	9.62109	18.6587	1597.42	19.9896	-31.5576	51.5472	9.73815	-12.9814
5164	-7.0901e+06	7.55201e+06	0.229651	-0.0575322	0.0533198	0.177627	-8.13224	12.094	-26.3749	230.773	37.4855	7.70962	50.2826	99.5379	25.7732	94.1862	41.8969	9.35933	18.2732	1594.97	19.5531	-31.6564	51.2095	9.37019	-11.4428
5165	-6.9901e+06	7.55201e+06	0.220609	-0.0599244	0.0578397	0.183935	-8.28523	11.5985	-26.2415	229.182	37.6784	7.46351	52.4293	100.923	25.0945	92.8914	39.2798	8.92121	17.7826	1570.1	18.7288	-31.4367	50.1655	9.10337	-11.784
5166	-6.8901e+06	7.55201e+06	0.253784	-0.0570531	0.0591156	0.191913	-8.31565	11.0435	-25.7537	231.109	38.4435	7.7686	53.6765	102.94	26.3532	91.6229	36.2841	8.46758	17.396	1528.14	17.8395	-30.8593	48.6988	8.81226	-14.0558
5167	-6.7901e+06	7.55201e+06	0.242439	-0.0458664	0.0554171	0.200517	-8.31878	10.5389	-25.2345	234.201	39.5677	8.26553	53.8105	104.51	28.6982	91.3505	33.8846	8.20377	17.2763	1487.4	17.2284	-30.3118	47.5402	8.50337	-17.7451
5168	-6.6901e+06	7.55201e+06	0.242439	-0.0458664	0.0554171	0.200517	-8.49966	9.97215	-24.9572	234.809	41.127	8.49755	55.2728	106.638	29.4017	93.2098	31.8512	8.1192	17.3802	1453.79	16.7548	-29.997	46.7518	7.90866	-20.8478
5169	-6.5901e+06	7.55201e+06	0.280255	-0.041953	0.0566998	0.210208	-9.04243	9.59746	-25.5625	233.355	42.8	8.14585	58.1713	109.566	28.2355	96.4016	30.3561	8.01036	17.0204	1458.91	16.5031	-30.5982	47.1013	7.70304	-22.9057
5170	-6.4901e+06	7.55201e+06	0.256101	-0.0161273	0.0575422	0.232093	-9.83715	9.02984	-26.4538	239.292	43.9724	8.41953	58.2925	112.978	28.9766	99.5595	30.6526	7.88868	16.6036	1474.34	15.9006	-31.6369	47.5375	7.37838	-23.9078
5171	-6.3901e+06	7.55201e+06	0.201629	-0.0342362	0.0790946	0.212967	-10.4189	8.6971	-27.1069	243.38	43.1454	9.14209	56.3543	113.603	30.0072	98.585	31.2682	7.92086	16.5153	1495.2	15.5767	-32.3885	47.9652	7.23099	-25.8605
5172	-6.2901e+06	7.55201e+06	0.201629	-0.0342362	0.0790946	0.212967	-10.9239	8.40655	-27.7258	228.978	40.1781	8.69003	56.8604	107.031	27.7252	92.5871	28.788	7.77314	16.3333	1513.94	15.2335	-32.9063	48.1398	7.11316	-26.4931
5173	-6.1901e+06	7.55201e+06	0.212563	-0.0864885	0.0594915	0.200411	-11.0753	7.93679	-27.6485	198.587	36.1242	6.54689	61.5654	95.6821	21.3154	83.9349	22.1292	7.29302	17.1662	1492.08	14.4361	-32.532	46.9681	6.77124	-26.865
5174	-6.0901e+06	7.55201e+06	0.212563	-0.0864885	0.0594915	0.200411	-11.4085	8.05361	-28.3346	177.696	33.9467	4.9723	66.2586	88.5516	16.2561	79.0062	16.8324	7.12903	16.401	1524.44	14.5682	-33.1812	47.7494	6.8236	-28.0244
5175	-5.9901e+06	7.55201e+06	0.212563	-0.0864885	0.0594915	0.200411	-11.5936	8.23468	-28.913	167.875	32.6827	4.49021	67.044	84.1577	14.4734	75.646	14.7982	7.22616	15.1259	1555.56	14.9031	-33.8012	48.7043	6.97841	-28.7876
5176	-5.8901e+06	7.55201e+06	0.212563	-0.0864885	0.0594915	0.200411	-11.7858	8.07499	-29.2143	167.229	32.4797	4.58533	65.0839	82.3329	15.0265	73.9259	15.1464	7.30506	15.8169	1558.53	14.8717	-34.0754	48.947	6.8433	-29.1172
5177	-5.7901e+06	7.55201e+06	0.212563	-0.0864885	0.0594915	0.200411	-12.445	8.14922	-30.3746	166.47	32.5321	4.82813	64.272	81.6971	15.5069	73.7999	15.511	7.59642	15.3278	1605.47	15.4377	-35.3399	50.7776	6.81154	-30.1875
5178	-5.6901e+06	7.55201e+06	0.189406	-0.0735163	0.0672831	0.214734	-12.7964	8.1333	-31.0044	161.648	31.7025	4.54749	65.4468	80.325	14.4015	72.5803	14.4054	7.79758	15.026	1628.93	15.7533	-36.1286	51.8819	6.75815	-30.8333
5179	-5.5901e+06	7.55201e+06	0.189406	-0.0735163	0.0672831	0.214734	-13.0259	7.79792	-31.229	155.332	31.1964	3.96458	69.182	80.3059	12.6728	71.5916	12.7032	7.80569	15.0067	1627.09	15.5085	-36.5132	52.0217	6.54605	-31.0957
5180	-5.4901e+06	7.55201e+06	0.189406	-0.0735163	0.0672831	0.214734	-13.3424	7.4406	-31.7004	156.52	31.5534	3.34218	72.7008	83.6814	11.4245	73.1375	11.4546	7.78365	14.8823	1634.18	15.2185	-37.0897	52.3082	6.36465	-31.6158
5181	-5.3901e+06	7.55201e+06	0.189406	-0.0735163	0.0672831	0.214734	-13.4405	6.93499	-31.6995	160.14	32.5009	3.39642	72.7961	85.8489	11.7021	74.215	11.7205	7.57993	15.5122	1614.31	14.5281	-36.97	51.4981	6.05882	-31.6483
5182	-5.2901e+06	7.55201e+06	0.189406	-0.0735163	0.0672831	0.214734	-13.5731	6.48269	-31.7587	169.701	34.4187	3.94446	70.3632	88.8871	13.4126	77.2642	13.4804	7.35815	15.5452	1597.35	13.9705	-36.8656	50.8361	5.73181	-31.6976
5183	-5.1901e+06	7.55201e+06	0.189406	-0.0735163	0.0672831	0.214734	-13.866	6.28273	-32.1069	193.626	38.2515	5.09196	65.7763	96.8505	16.8535	86.1832	16.9862	7.22349	14.8146	1600.15	13.8938	-37.1869	51.0807	5.51407	-31.9975
5184	-5.0901e+06	7.55201e+06	0.189406	-0.0735163	0.0672831	0.214734	-14.2585	6.16687	-32.5775	227.299	44.1969	6.16949	63.1217	110.558	20.4776	99.1119	20.6795	7.19518	14.0401	1611.41	13.9662	-37.7047	51.6709	5.33606	-32.4686
5185	-4.9901e+06	7.55201e+06	0.189406	-0.0735163	0.0672831	0.214734	-14.1829	5.78274	-32.0155	251.151	49.1174	6.65355	62.886	121.843	22.6232	108.878	22.7738	6.86317	13.6269	1568.58	13.3948	-36.9347	50.3295	4.97924	-31.9768
5186	-4.8901e+06	7.55201e+06	0.181565	-0.0599571	0.0942823	0.23698	-13.554	5.80964	-30.9277	262.05	50.9743	7.15278	61.2281	124.985	24.659	111.094	24.6856	6.54054	13.5091	1520.58	13.2259	-35.5874	48.8134	4.95675	-30.8958
5187	-4.7901e+06	7.55201e+06	0.181565	-0.0599571	0.0942823	0.23698	-12.9963	5.56494	-30.038	259.054	48.4014	7.9152	56.6344	118.104	27.4228	104.658	27.4777	6.45806	13.7404	1475.23	12.6742	-34.625	47.2992	4.80066	-29.861
5188	-4.6901e+06	7.55201e+06	0.150886	-0.044323	0.0888748	0.261662	-13.0022	5.26714	-29.8198	235.971	44.7355	6.78896	58.7637	109.849	23.8766	97.3262	23.8894	6.49531	14.1977	1457.94	12.1828	-34.5461	46.7288	4.68782	-29.8097
5189	-4.5901e+06	7.55201e+06	0.150886	-0.044323	0.0888748	0.261662	-13.382	5.12115	-30.2687	226.06	43.8901	5.99671	60.6945	107.36	21.7957	96.0568	21.8784	6.67779	14.1892	1471.66	12.1584	-35.1755	47.3339	4.54744	-30.2458
5190	-4.4901e+06	7.55201e+06	0.150886	-0.044323	0.0888748	0.261662	-13.1543	5.10096	-30.0287	227.871	43.8839	5.98385	58.9285	106.537	22.2741	95.5406	22.3565	6.80923	14.4685	1461.29	12.1157	-35.0222	47.1379	4.5936	-30.007
5191	-4.3901e+06	7.55201e+06	0.150886	-0.044323	0.0888748	0.261662	NA	NA	NA	NA	NA	NA	NA	NA	NA	NA	NA	NA	NA	NA	NA	NA	NA	NA	NA
5242	709904	7.55201e+06	0.0684078	-0.0479553	0.0171563	0.217103	NA	NA	NA	NA	NA	NA	NA	NA	NA	NA	NA	NA	NA	NA	NA	NA	NA	NA	NA
5243	809904	7.55201e+06	0.0589476	-0.0536455	0.0245053	0.19812	2.37616	10.4978	-4.34831	1202.02	149.386	60.891	28.0579	394.877	194.966	254.44	341.257	5.31195	23.9767	615.388	14.7701	-7.40158	22.1717	2.07855	4.12024
5244	909904	7.55201e+06	0.0466056	-0.0615241	0.00791461	0.182075	-1.08126	8.73879	-9.35395	765.457	96.0925	39.5102	26.496	246.17	129.18	212.695	209.718	6.63218	24.026	746.91	14.052	-13.5138	27.5658	3.3209	-2.19007
5245	1.0099e+06	7.55201e+06	0.0690834	-0.0590172	0.00700062	0.188217	-2.08518	9.42167	-12.2554	617.868	92.3457	32.2468	34.4726	226.638	103.603	225.168	127.323	8.21465	24.6403	888.801	15.6228	-17.613	33.2357	9.22911	-7.31941
5246	1.1099e+06	7.55201e+06	0.0855476	-0.067888	0.012044	0.181481	-1.40002	11.2253	-13.011	537.383	88.5357	25.6644	42.161	215.863	81.2959	215.856	93.0633	9.32079	25.4235	984.206	17.8746	-18.7746	36.6492	11.2164	-8.06165
5247	1.2099e+06	7.55201e+06	0.060815	-0.0732436	0.00645686	0.1681	-0.731276	12.0774	-12.5631	532.849	78.1693	26.632	37.1148	203.17	84.8075	202.719	94.8792	9.02969	24.5264	996.472	18.7795	-18.0192	36.7987	11.7807	-7.30822
5248	1.3099e+06	7.55201e+06	0.0400958	-0.0644902	-0.000727281	0.165133	-0.735272	12.3283	-13.0457	532.008	76.5492	27.6056	36.4278	202.373	86.5765	201.456	96.0479	9.0942	23.9858	1021.98	19.1201	-18.792	37.9121	11.7844	-7.30576
5249	1.4099e+06	7.55201e+06	0.0400958	-0.0644902	-0.000727281	0.165133	-0.860784	12.1002	-12.9614	536.539	75.3204	27.3857	35.9553	201.651	87.2441	200.987	95.1107	8.72803	23.3515	1008.42	18.7957	-18.5583	37.354	11.8609	-8.45948
5250	1.5099e+06	7.55201e+06	0.0394131	-0.0620395	0.0132778	0.171601	-0.903435	11.9999	-12.83	525.13	69.5358	27.5052	32.7752	191.232	85.715	191.217	96.2864	8.62012	23.1859	998.428	18.8292	-18.3383	37.1675	11.9896	-7.70569
5251	1.6099e+06	7.55201e+06	0.0394131	-0.0620395	0.0132778	0.171601	-0.850588	11.6498	-12.4364	558.343	76.0698	27.9032	34.0852	206.599	88.2992	206.599	99.0014	8.37145	23.0722	970.081	18.5083	-17.7128	36.2211	11.6498	-7.50305
5252	1.7099e+06	7.55201e+06	0.0230697	-0.0539377	0.00884052	0.177222	-0.895045	11.5638	-12.6352	541.784	76.5889	25.7427	35.9786	202.656	82.1593	202.336	93.3295	8.00855	22.0484	976.766	18.3691	-17.9313	36.3004	11.3977	-7.73787
5253	1.8099e+06	7.55201e+06	0.059127	-0.0598302	0.012664	0.176672	-0.829564	11.4274	-12.2357	529.068	69.344	24.3062	34.6374	192.417	79.0203	188.999	91.3741	7.39761	20.8771	955.42	17.9053	-17.5228	35.4281	10.5205	-8.08397
5254	1.9099e+06	7.55201e+06	0.0927858	-0.0563561	0.00595514	0.195687	-0.955768	11.0332	-11.9467	500.348	64.8207	22.8135	34.5134	181.353	75.3739	180.09	84.2011	7.56275	21.8726	930.968	17.312	-17.2699	34.5819	10.6471	-9.47227
5255	2.0099e+06	7.55201e+06	0.0701398	-0.0686523	-0.00649981	0.170497	-1.19341	10.3955	-11.6838	487.5	63.2348	23.1032	32.666	173.23	76.9878	172.966	83.8606	7.39347	22.0194	898.943	16.4881	-17.0417	33.5298	10.2052	-9.29414
5256	2.1099e+06	7.55201e+06	0.0701398	-0.0686523	-0.00649981	0.170497	-1.41455	9.68425	-11.4859	481.209	62.79	23.3838	32.5547	169.278	76.9834	165.859	84.6967	6.98866	21.7117	867.637	15.5279	-16.6102	32.1382	7.8384	-8.63719
5257	2.2099e+06	7.55201e+06	0.101612	-0.065326	-0.00788857	0.182506	-1.70633	9.24365	-11.7879	445.817	58.0396	21.8786	32.5831	157.499	72.8629	154.081	77.2366	6.76975	21.2884	866.495	14.9803	-16.7409	31.7212	7.54892	-10.029
5258	2.3099e+06	7.55201e+06	0.108936	-0.0907635	0.0217506	0.180564	NA	NA	NA	NA	NA	NA	NA	NA	NA	NA	NA	NA	NA	NA	NA	NA	NA	NA	NA
5259	2.4099e+06	7.55201e+06	0.0816646	-0.068288	0.031058	0.200496	-1.35536	9.24973	-11.0877	424.465	53.7503	21.948	32.4887	157.079	68.769	134.211	79.2932	6.35384	20.4405	842.867	14.8972	-16.1862	31.0833	5.69684	-8.55805
5260	2.5099e+06	7.55201e+06	0.11461	-0.0886702	0.0222391	0.177656	NA	NA	NA	NA	NA	NA	NA	NA	NA	NA	NA	NA	NA	NA	NA	NA	NA	NA	NA
5261	2.6099e+06	7.55201e+06	0.0906915	-0.0631337	-0.0162236	0.163586	NA	NA	NA	NA	NA	NA	NA	NA	NA	NA	NA	NA	NA	NA	NA	NA	NA	NA	NA
5262	2.7099e+06	7.55201e+06	0.0757444	-0.0853445	-0.00639472	0.138665	-2.99863	9.55839	-14.9271	452.764	59.2776	22.7285	34.1277	167.222	71.5345	150.685	83.444	7.89269	21.05	998.817	16.6836	-20.7949	37.4785	5.94956	-10.81
5263	2.8099e+06	7.55201e+06	0.0635382	-0.0712353	0.00987712	0.172835	-3.43406	10.0347	-16.2595	450.763	59.5035	22.2108	34.273	166.27	69.8573	154.921	80.2027	8.26704	20.5522	1068.9	17.75	-22.4405	40.1904	9.01283	-12.556
5264	2.9099e+06	7.55201e+06	0.0635382	-0.0712353	0.00987712	0.172835	-3.49088	10.472	-16.5055	458.968	60.8492	22.0168	33.0769	166.643	71.3791	156.001	83.944	7.85844	19.5313	1099.47	17.7825	-22.4126	40.1951	9.71144	-13.174
5265	3.0099e+06	7.55201e+06	0.0754261	-0.0608885	-0.00721859	0.167917	-4.04981	10.064	-17.0156	467.802	59.792	23.1865	30.3256	165.607	74.904	153.377	94.3171	7.41779	18.9812	1107.39	16.9424	-22.1365	39.0789	9.36697	-12.4891
5266	3.1099e+06	7.55201e+06	0.0754261	-0.0608885	-0.00721859	0.167917	-4.49032	9.96378	-17.6656	455.992	57.6133	22.2953	31.0688	162.92	71.0332	149.938	93.229	7.56273	19.0176	1131.52	17.2126	-22.5541	39.7668	9.21585	-13.0823
5267	3.2099e+06	7.55201e+06	0.0920266	-0.0681391	-0.00829018	0.162342	-4.83327	10.0389	-18.2566	453.758	59.3837	21.5929	32.9388	164.939	68.8452	153.32	89.573	8.2226	19.5678	1159.32	18.2838	-23.7218	42.0056	9.22728	-13.7149
5268	3.3099e+06	7.55201e+06	0.10727	-0.0738375	-0.00226526	0.155719	-5.32346	9.91416	-19.1105	483.98	63.0848	23.8572	31.8578	172.678	76.019	162.131	94.2958	8.73906	19.965	1184.16	18.7154	-25.0489	43.7643	9.09738	-14.1912
5269	3.4099e+06	7.55201e+06	0.094145	-0.091477	0.0122273	0.157883	-5.54241	9.87951	-19.4757	527.748	65.1825	27.1279	28.8629	182.364	87.3117	172.89	106.024	8.72805	19.9162	1197.32	18.486	-25.3195	43.8055	9.10397	-14.3917
5270	3.5099e+06	7.55201e+06	0.0846494	-0.100019	0.0323615	0.159641	-5.81107	9.55968	-19.3388	577.557	72.3268	30.3271	29.1929	201.923	96.5072	193.719	113.133	8.46815	19.6578	1180.54	17.8532	-25.1671	43.0203	8.74388	-14.8724
5271	3.6099e+06	7.55201e+06	0.097123	-0.0948192	0.0265704	0.135386	-6.53885	8.38521	-19.2325	541.866	74.2807	26.0174	35.6109	201.102	84.1581	196.464	93.0341	7.49317	18.4941	1135.43	16.0214	-24.58	40.6015	7.70292	-17.3701
5272	3.7099e+06	7.55201e+06	0.0854158	-0.101072	0.0205195	0.119649	-6.55892	9.18958	-20.1782	425.194	62.7692	19.125	38.9317	162.793	63.2221	159.078	70.4611	7.52118	17.7384	1217.69	16.8074	-25.7062	42.5136	8.74825	-18.6867
5273	3.8099e+06	7.55201e+06	0.0702131	-0.0941599	0.01619	0.123488	-6.88383	9.8842	-21.7388	384.927	57.3502	18.2612	37.2768	145.815	59.2668	140.521	66.5657	7.74273	17.1844	1308	17.6815	-27.3903	45.0718	9.46345	-19.4534
5274	3.9099e+06	7.55201e+06	0.0920644	-0.0931175	0.0155957	0.127771	-7.46598	9.85979	-23.0676	375.351	55.1138	18.7053	34.8852	139.242	59.6378	133.194	67.998	8.00505	17.2621	1358.73	17.7935	-28.7166	46.5101	8.75922	-18.9734
5275	4.0099e+06	7.55201e+06	0.0758718	-0.0852979	0.0107003	0.132268	NA	NA	NA	NA	NA	NA	NA	NA	NA	NA	NA	NA	NA	NA	NA	NA	NA	NA	NA
5276	4.1099e+06	7.55201e+06	0.117891	-0.0876446	0.0309465	0.158178	-8.37106	9.94278	-24.7041	378.793	58.5387	18.0941	39.5985	147.801	57.9255	138.894	63.8774	7.84677	16.4724	1429.6	17.3543	-30.2866	47.6409	9.53673	-22.623
5277	4.2099e+06	7.55201e+06	0.117891	-0.0876446	0.0309465	0.158178	-8.47886	10.3867	-25.1327	394.841	60.8202	19.0165	39.3471	152.83	60.259	147.055	68.6331	7.94901	16.2689	1463.43	18.2007	-30.6632	48.8639	9.80776	-21.3744
5278	4.3099e+06	7.55201e+06	0.107383	-0.0979045	0.0355938	0.145445	-8.55112	10.6834	-25.4157	426.664	62.2251	21.3122	35.4003	156.514	67.2112	154.429	80.3669	7.99383	16.0855	1486.37	18.777	-30.9189	49.6959	10.0199	-19.7863
5279	4.4099e+06	7.55201e+06	0.0820155	-0.0988748	0.0353961	0.139834	-8.55633	10.9759	-25.6732	448.068	61.9611	22.6652	33.3843	159.456	70.7697	157.031	85.5255	8.18244	16.1767	1506.17	19.2598	-31.3188	50.5785	8.51505	-19.5401
5280	4.5099e+06	7.55201e+06	0.0963765	-0.0814126	-0.00492747	0.135987	-8.47913	11.2906	-25.8078	460.159	60.8837	23.014	33.1419	163.596	72.0354	156.496	87.285	8.51493	16.5729	1522.52	19.7368	-31.6341	51.3709	4.75301	-19.3721
5281	4.6099e+06	7.55201e+06	0.0639577	-0.0578679	-0.00973086	0.164311	-8.5636	11.453	-26.2323	483.667	61.3044	24.3924	32.4187	171.003	76.3562	158.995	93.3979	8.96645	17.1688	1545.01	20.0375	-32.1762	52.2137	2.77356	-19.235
5282	4.7099e+06	7.55201e+06	0.0636214	-0.0592001	-0.00396899	0.164012	-8.447	11.7386	-26.5784	502.292	62.4751	25.1282	32.3501	176.645	78.3652	163.12	99.7688	8.95886	17.0152	1568.89	20.2309	-32.3862	52.6171	2.95528	-18.9536
5283	4.8099e+06	7.55201e+06	0.0907762	-0.0714157	0.00536588	0.153753	-8.66941	11.486	-26.7925	523.438	65.6314	25.6852	33.1235	184.792	80.1356	174.48	101.829	8.48526	16.2914	1566.49	19.9435	-32.1228	52.0663	4.8744	-19.267
5284	4.9099e+06	7.55201e+06	0.116046	-0.0786898	0.0181208	0.16553	-9.74582	10.4349	-27.929	532.396	68.4262	25.0941	34.9144	191.426	79.3873	186.129	99.2422	8.684	16.5047	1571.89	19.3737	-33.2219	52.5956	7.26538	-20.6994
5285	5.0099e+06	7.55201e+06	0.13109	-0.0751279	0.0211643	0.18347	-10.7068	10.0017	-29.7788	511.297	68.5384	22.8165	37.9078	191.082	72.7858	189.241	91.045	9.46932	17.1955	1628.87	19.4425	-35.6151	55.0576	9.11345	-22.627
5286	5.1099e+06	7.55201e+06	0.117269	-0.0687038	0.0232864	0.189429	-11.8942	9.05552	-31.2378	502.373	70.353	21.338	41.0256	194.844	68.3888	194.57	83.3487	9.90022	17.6018	1651.42	18.7283	-37.5124	56.2407	8.8954	-25.9239
5287	5.2099e+06	7.55201e+06	0.117269	-0.0687038	0.0232864	0.189429	-12.5085	8.94262	-32.5098	469.137	69.6287	18.8252	44.2511	188.595	60.7147	188.59	73.2335	10.2751	17.8139	1697.16	18.5725	-39.1039	57.6763	8.93807	-28.5884
5288	5.3099e+06	7.55201e+06	0.141002	-0.0666431	0.0229759	0.19635	-12.9082	8.98475	-33.331	431.942	68.0633	16.0601	47.7324	180.566	52.6447	180.566	62.6908	10.5287	17.9735	1731.55	18.5325	-40.045	58.5776	8.98475	-30.4936
5289	5.4099e+06	7.55201e+06	0.141002	-0.0666431	0.0229759	0.19635	-12.9095	9.46551	-33.8341	384.087	64.9812	12.829	52.9479	168.712	43.1793	168.712	50.7514	10.8345	18.1673	1770.94	18.8901	-40.7491	59.6392	9.46551	-31.1016
5290	5.5099e+06	7.55201e+06	0.141002	-0.0666431	0.0229759	0.19635	-12.3253	10.7768	-34.3034	322.15	59.4524	9.21317	59.8274	150.326	32.32	150.326	37.3463	11.2144	18.1867	1842.47	19.9854	-41.69	61.6754	10.7768	-31.2319
5291	5.6099e+06	7.55201e+06	0.126529	-0.0604074	0.0177517	0.204942	-12.1432	11.2528	-34.4571	288.357	56.7729	6.91264	65.0338	141.428	25.3598	141.428	29.3179	11.295	18.1152	1868.63	20.3152	-42.0369	62.3521	11.2528	-31.2577
5292	5.7099e+06	7.55201e+06	0.126529	-0.0604074	0.0177517	0.204942	-12.3861	11.0152	-34.6968	285.935	56.5171	6.36589	66.1758	142.122	23.5387	142.122	27.8765	11.2362	18.0366	1870.98	20.0614	-42.2299	62.2913	11.0152	-31.5124
5293	5.8099e+06	7.55201e+06	0.126529	-0.0604074	0.0177517	0.204942	-12.3675	11.0533	-34.8918	290.707	54.9793	6.93775	63.8581	141.882	24.6391	141.882	29.4367	11.182	17.8924	1883.53	20.161	-42.3253	62.4863	11.0533	-31.6756
5294	5.9099e+06	7.55201e+06	0.111131	-0.0508257	0.0127372	0.21299	-12.2695	11.1948	-34.935	298.167	53.5371	7.41748	61.3728	142.686	26.3403	142.686	31.6631	10.9803	17.5567	1893.74	20.3073	-42.2083	62.5155	11.1948	-31.69
5295	6.0099e+06	7.55201e+06	0.111131	-0.0508257	0.0127372	0.21299	-12.1373	11.3962	-34.9189	305.621	53.0312	7.70369	60.0408	144.687	27.4509	144.687	33.1005	10.5497	16.9017	1901.42	20.4486	-41.9279	62.3765	11.3962	-31.5077
5296	6.1099e+06	7.55201e+06	0.137822	-0.0476714	0.0119049	0.221926	-12.2385	11.5012	-35.2229	306.963	53.6383	7.59328	60.8041	146.11	26.8686	146.11	32.7624	10.4188	16.6294	1918	20.6343	-41.9974	62.6317	11.5012	-31.5882
5297	6.2099e+06	7.55201e+06	0.137822	-0.0476714	0.0119049	0.221926	-12.7782	11.5125	-36.4692	298.112	53.7066	7.39971	62.1157	143.634	25.6596	143.634	30.9535	11.11	17.2575	1971.8	21.0032	-43.3436	64.3468	11.5125	-32.6219
5298	6.3099e+06	7.55201e+06	0.137822	-0.0476714	0.0119049	0.221926	-13.4093	11.5293	-38.0376	282.945	51.2687	7.35707	61.5631	135.572	24.9361	135.572	29.6031	11.859	17.8421	2039.82	21.3249	-45.1529	66.4778	11.5293	-33.979
5299	6.4099e+06	7.55201e+06	0.137822	-0.0476714	0.0119049	0.221926	-13.6061	11.7122	-38.8907	269.834	46.8034	7.45353	58.6931	124.43	24.6826	124.428	29.4997	11.8053	17.4901	2083.71	21.4423	-46.0455	67.4878	11.7083	-34.6286
5300	6.5099e+06	7.55201e+06	0.137822	-0.0476714	0.0119049	0.221926	-13.2565	12.0064	-38.6308	265.941	43.8651	7.77898	55.9762	117.338	25.0657	117.322	30.1732	11.0877	16.5845	2085.45	21.3592	-45.409	66.7682	11.9685	-34.2444
5301	6.6099e+06	7.55201e+06	0.137822	-0.0476714	0.0119049	0.221926	-12.7238	12.1606	-37.7618	274.83	44.5015	7.9309	55.3473	118.85	25.73	118.787	30.82	10.2095	15.6981	2056.85	21.0176	-43.9049	64.9225	12.0309	-33.3505
5302	6.7099e+06	7.55201e+06	0.1567	-0.0559477	0.0119418	0.198411	-12.2033	12.4821	-36.935	288.367	46.9273	8.58057	55.7989	124.919	27.8748	124.786	32.3355	9.57086	15.0349	2038.44	20.9095	-42.6924	63.6019	12.1892	-32.5416
5303	6.8099e+06	7.55201e+06	0.190898	-0.0638705	0.0145023	0.176068	-12.1395	12.2174	-35.9926	313.656	51.3744	9.82102	56.2593	138.077	31.6423	138.017	35.6036	9.33869	15.0545	1995.3	20.1831	-41.9338	62.1169	12.0596	-31.9073
5304	6.9099e+06	7.55201e+06	0.190898	-0.0638705	0.0145023	0.176068	-12.8234	10.7703	-35.0475	350.704	58.7765	10.7452	58.2181	160.791	34.3901	160.784	40.8247	9.47747	15.9457	1905.29	18.4312	-41.2152	59.6464	10.7527	-31.5624
5305	7.0099e+06	7.55201e+06	0.191959	-0.0670441	0.00111479	0.169872	-13.7611	9.43897	-34.9596	372.402	64.402	10.7578	61.14	178.232	35.1049	178.232	42.9186	9.86184	16.9705	1851.35	17.2987	-40.8912	58.1899	9.43897	-31.8473
5306	7.1099e+06	7.55201e+06	0.196139	-0.0741267	-0.00227401	0.162417	-14.1496	9.80153	-36.3648	340.626	61.0937	9.13802	64.4269	168.538	30.7971	168.538	38.1489	10.5142	17.4755	1923.6	18.1842	-41.9689	60.1531	9.80153	-32.4784
5307	7.2099e+06	7.55201e+06	0.196139	-0.0741267	-0.00227401	0.162417	-14.2684	11.0719	-38.7645	277.858	52.3124	6.71062	68.2405	143.185	23.89	143.185	30.4535	11.1739	17.4174	2074.47	19.9838	-44.2169	64.2007	11.0719	-34.3083
5308	7.3099e+06	7.55201e+06	0.196139	-0.0741267	-0.00227401	0.162417	-14.5309	11.8028	-40.3838	234.628	47.0784	5.18016	72.7086	126.983	18.925	126.983	24.3887	11.5429	17.2763	2174.64	21.1133	-45.7598	66.8731	11.8028	-35.3114
5309	7.4099e+06	7.55201e+06	0.185976	-0.066746	-0.00710828	0.167509	-14.7078	11.6697	-40.2983	227.131	48.3727	4.69133	77.0455	127.835	17.099	127.835	21.3326	11.6961	17.5049	2170.04	21.1821	-45.6797	66.8617	11.6697	-36.6501
5310	7.5099e+06	7.55201e+06	0.194286	-0.0763031	0.00151587	0.17323	-14.8391	10.887	-39.0246	245.352	54.7415	4.97535	81.3416	142.242	17.634	142.242	20.8733	11.5665	17.9032	2088.87	20.3271	-44.3096	64.6367	10.887	-35.8716
5311	7.6099e+06	7.55201e+06	0.194286	-0.0763031	0.00151587	0.17323	-14.757	10.6552	-38.2608	255.439	58.2973	5.05634	84.2183	150.433	17.9353	150.433	21.0883	11.3368	17.8972	2046.27	19.8544	-43.4935	63.348	10.6552	-33.6001
5312	7.7099e+06	7.55201e+06	0.21061	-0.0809778	0.00246856	0.170821	-14.5031	10.9206	-38.1135	251.441	57.2685	4.84678	84.2808	148.034	17.7931	148.034	22.3232	11.1101	17.6139	2046.92	19.7933	-43.3119	63.1052	10.9206	-31.1531
5313	7.8099e+06	7.55201e+06	0.208287	-0.0759174	0.0107606	0.177993	-14.017	11.5878	-38.2086	241.281	52.6728	4.87824	79.8386	137.449	18.5412	137.449	25.4395	10.9802	17.2786	2074.06	20.1835	-43.3815	63.5651	11.5878	-28.9079
5314	7.9099e+06	7.55201e+06	0.197336	-0.0650835	0.0203292	0.190822	-13.6568	11.9274	-37.9476	236.94	48.9897	5.10391	74.1783	128.892	19.9929	128.892	29.7857	10.8144	17.0683	2073.82	20.2972	-43.0391	63.3363	11.9269	-26.1295
5315	8.0099e+06	7.55201e+06	0.185612	-0.0580006	0.0225027	0.197314	-13.5021	11.5591	-36.9692	240.361	47.7921	5.3857	69.2564	125.622	21.6136	125.582	33.7543	10.5339	17.0896	2017.64	19.7004	-41.8945	61.5949	11.4862	-23.2018
5316	8.1099e+06	7.55201e+06	0.189076	-0.064334	0.0128023	0.188572	-13.2298	11.22	-35.8122	239.334	45.8137	5.73808	65.0358	120.4	22.5709	120.187	36.0968	10.1874	17.0212	1956.55	19.1983	-40.58	59.7783	10.8489	-21.4054
5317	8.2099e+06	7.55201e+06	0.177801	-0.0541306	0.00130717	0.195669	-12.6854	11.4988	-35.1546	231.397	41.7112	5.85042	60.2944	110.567	22.7045	109.917	37.073	9.82558	16.5984	1939.94	19.2895	-39.8359	59.1254	10.349	-17.5413
5318	8.3099e+06	7.55201e+06	0.155176	-0.0369108	-0.0129408	0.19251	-12.4049	11.7601	-35.0285	226.904	38.8815	5.86659	56.0565	103.764	23.3519	102.357	38.1494	9.54508	16.1442	1944.54	19.4789	-39.6182	59.0972	9.52868	-15.0916
5319	8.4099e+06	7.55201e+06	0.173445	-0.0532358	-0.0168403	0.177591	-12.3741	11.7406	-35.018	222.367	37.9239	5.89435	54.6607	100.4	23.237	98.4632	38.2398	9.50628	16.103	1943.54	19.4948	-39.5486	59.0434	9.07912	-14.4285
5320	8.5099e+06	7.55201e+06	0.165613	-0.0655523	-0.0242157	0.179453	-12.6018	11.3221	-34.9558	216.956	38.4034	5.83153	56.2286	99.5751	22.4367	97.5327	37.0942	9.69262	16.5279	1924.92	19.2381	-39.4123	58.6504	8.64114	-15.4449
5321	8.6099e+06	7.55201e+06	0.187656	-0.0753128	-0.0122388	0.166331	-12.8032	10.8643	-34.7758	214.931	40.0263	6.04843	58.4229	100.679	22.4498	99.0383	35.7517	9.85022	16.9242	1898.76	18.9325	-39.2639	58.1964	8.59034	-16.9707
5322	8.7099e+06	7.55201e+06	0.197043	-0.084729	0.00126013	0.174073	-12.6528	10.7178	-34.3278	214.8	41.1185	6.28008	59.8169	102.028	22.5949	100.237	34.4279	10.0222	17.3052	1873.02	18.9409	-38.9704	57.9113	9.12547	-18.928
5323	8.8099e+06	7.55201e+06	0.186176	-0.0788984	0.00256637	0.179463	-12.348	10.7547	-33.7129	216.609	41.0827	6.68607	59.2008	102.796	23.2433	100.227	34.3506	10.2447	17.7542	1848.1	19.1411	-38.5745	57.7156	9.13751	-19.5206
5324	8.9099e+06	7.55201e+06	0.174474	-0.0726193	0.00397309	0.185268	-12.3313	10.4896	-33.0769	220.345	40.6802	7.16588	57.4642	103.295	24.3477	100.11	35.6757	10.4338	18.3161	1812.63	18.9357	-38.0669	57.0026	8.22274	-19.9036
5325	9.0099e+06	7.55201e+06	0.168926	-0.0646264	0.00801843	0.194532	-12.6107	9.9992	-32.676	222.976	39.9075	7.48393	55.3518	102.349	25.2225	99.5107	37.8826	10.5477	18.8174	1779.62	18.3387	-37.742	56.0807	7.64864	-18.6059
5326	9.1099e+06	7.55201e+06	0.168926	-0.0646264	0.00801843	0.194532	-13.0143	9.32977	-32.1689	232.857	40.8439	7.79933	53.9831	105.402	27.0888	103.213	40.9023	10.4921	19.1347	1736.69	17.5543	-37.2691	54.8234	7.65183	-18.5851
5327	9.2099e+06	7.55201e+06	0.155936	-0.0556197	0.0028073	0.201811	-13.2239	8.7849	-31.4346	250.113	43.5576	8.50034	53.3851	112.276	30.2129	110.786	43.9369	10.267	19.1687	1688.18	16.9561	-36.5451	53.5012	7.74835	-19.6985
5328	9.3099e+06	7.55201e+06	0.154808	-0.0635252	0.0256078	0.206281	-13.0599	8.32784	-30.2868	276.143	47.3058	10.0898	51.4811	121.33	35.9206	120.242	47.4113	9.87259	19.0766	1624.76	16.4204	-35.2707	51.6911	7.36761	-21.2284
5329	9.4099e+06	7.55201e+06	0.112815	-0.0629534	0.0197483	0.208797	-12.6427	7.88673	-28.8935	296.426	49.8062	12.061	49.0476	126.759	41.3876	125.64	50.0077	9.47505	19.1289	1551.22	15.77	-33.7053	49.4753	6.75839	-22.7663
5330	9.5099e+06	7.55201e+06	0.118942	-0.0764517	0.0443672	0.204611	-12.075	7.5448	-27.4747	304.28	50.7532	12.9388	48.0198	129.195	43.3215	127.272	51.615	9.0695	19.1314	1478.91	15.0851	-32.1759	47.261	5.88494	-21.873
5331	9.6099e+06	7.55201e+06	0.139219	-0.0943554	0.0478542	0.173509	-11.813	6.89173	-26.4243	311.908	51.3108	13.4301	47.2707	132.311	44.0408	128.944	54.675	8.51424	18.8154	1409.85	13.9732	-31.0546	45.0278	5.0125	-20.3237
5332	9.7099e+06	7.55201e+06	0.138879	-0.118652	0.0554252	0.158368	-11.6965	6.31835	-25.7475	323.848	51.8355	13.7709	45.9971	135.795	44.0162	131.328	58.8232	7.93465	18.2164	1359.51	12.9951	-30.3591	43.3541	4.58753	-17.8087
5333	9.8099e+06	7.55201e+06	0.13204	-0.113451	0.0696819	0.167785	-11.5095	6.08298	-25.2513	344.781	53.143	14.3796	43.4784	141.008	46.1201	135.224	65.0386	7.51362	17.6666	1330.1	12.5608	-29.8777	42.4385	4.60496	-16.9649
5334	9.9099e+06	7.55201e+06	0.130902	-0.118254	0.0444611	0.155217	NA	NA	NA	NA	NA	NA	NA	NA	NA	NA	NA	NA	NA	NA	NA	NA	NA	NA	NA
5335	1.00099e+07	7.55201e+06	0.178911	-0.109006	0.041028	0.178163	NA	NA	NA	NA	NA	NA	NA	NA	NA	NA	NA	NA	NA	NA	NA	NA	NA	NA	NA
5493	-1.02901e+07	7.45201e+06	0.217329	-0.0972948	0.0253593	0.12175	NA	NA	NA	NA	NA	NA	NA	NA	NA	NA	NA	NA	NA	NA	NA	NA	NA	NA	NA
5494	-1.01901e+07	7.45201e+06	0.202502	-0.0840189	0.033305	0.16403	NA	NA	NA	NA	NA	NA	NA	NA	NA	NA	NA	NA	NA	NA	NA	NA	NA	NA	NA
5495	-1.00901e+07	7.45201e+06	0.202502	-0.0840189	0.033305	0.16403	-7.5623	6.99488	-19.6462	534.498	75.6813	23.7095	38.4458	200.938	76.1135	176.05	100.465	6.67594	18.3481	1122.94	12.6011	-23.7817	36.3828	5.38238	-11.9079
5496	-9.9901e+06	7.45201e+06	0.202502	-0.0840189	0.033305	0.16403	-7.95664	6.76798	-20.3692	517.084	70.5739	23.5297	36.3007	189.08	75.3829	161.838	99.4103	6.53351	17.7731	1142.6	12.3532	-24.3964	36.7496	4.52648	-11.6756
5497	-9.8901e+06	7.45201e+06	0.202502	-0.0840189	0.033305	0.16403	-7.86698	6.52495	-20.3691	480.567	66.1364	21.7699	36.3163	175.519	70.8595	148.031	91.769	6.23789	17.4745	1131.73	11.9322	-24.198	36.1302	3.88203	-11.5951
5498	-9.7901e+06	7.45201e+06	0.175475	-0.0582176	0.0458613	0.190045	-7.7383	6.26781	-20.3645	427.637	61.6633	19.1342	38.1158	160.194	62.819	134.229	78.3547	5.84423	16.6277	1119.25	11.4413	-23.9577	35.399	3.00562	-12.5454
5499	-9.6901e+06	7.45201e+06	0.175475	-0.0582176	0.0458613	0.190045	-7.68635	6.00884	-20.525	375.257	57.8253	16.177	42.5505	149.794	53.4299	125.993	64.7225	5.47425	16.0653	1111.37	10.9721	-23.9961	34.9682	2.94353	-12.2382
5500	-9.5901e+06	7.45201e+06	0.203839	-0.0952131	0.0546414	0.165138	NA	NA	NA	NA	NA	NA	NA	NA	NA	NA	NA	NA	NA	NA	NA	NA	NA	NA	NA
5501	-9.4901e+06	7.45201e+06	0.192979	-0.0996087	0.0588465	0.177802	NA	NA	NA	NA	NA	NA	NA	NA	NA	NA	NA	NA	NA	NA	NA	NA	NA	NA	NA
5502	-9.3901e+06	7.45201e+06	0.192979	-0.0996087	0.0588465	0.177802	-4.81903	9.32368	-17.336	378.01	71.1558	16.4426	55.8646	175.697	55.1918	139.884	58.7051	7.15109	19.2569	1113.51	15.195	-21.8808	37.0757	8.56637	-10.0046
5503	-9.2901e+06	7.45201e+06	0.192979	-0.0996087	0.0588465	0.177802	-4.70008	9.88637	-17.6511	354.712	70.9618	14.6109	59.6976	170.782	49.9462	134.095	53.7918	7.81279	20.0152	1147.57	16.3347	-22.6764	39.0111	8.96785	-8.76841
5504	-9.1901e+06	7.45201e+06	0.222767	-0.0773932	0.0671036	0.165561	NA	NA	NA	NA	NA	NA	NA	NA	NA	NA	NA	NA	NA	NA	NA	NA	NA	NA	NA
5505	-9.0901e+06	7.45201e+06	0.193552	-0.0817163	0.0698369	0.170892	-3.9904	11.0726	-17.1403	303.026	64.5589	11.5255	63.6428	152.413	40.8889	129.217	46.7178	8.75018	21.9104	1173.16	18.029	-23.389	41.418	9.54592	-8.56224
5506	-8.9901e+06	7.45201e+06	0.182973	-0.0798715	0.0664091	0.178477	-3.83088	11.9287	-17.5088	287.838	61.2248	10.2432	63.4097	143.623	38.0189	126.701	45.4284	8.68565	20.476	1226.86	18.7521	-23.6482	42.4003	10.1125	-6.62023
5507	-8.8901e+06	7.45201e+06	0.148804	-0.074137	0.0627649	0.178354	-3.83432	12.578	-18.0017	306.817	65.8351	11.2058	62.6635	150.202	42.6966	138.587	48.3034	9.00081	20.8116	1275.15	19.5315	-23.6687	43.2002	10.369	-7.64049
5508	-8.7901e+06	7.45201e+06	0.154063	-0.0593942	0.0653914	0.178041	-4.22911	12.9343	-19.3419	339.258	73.0727	12.6633	62.2873	163.942	48.0063	154.793	52.2593	9.78453	21.8001	1342.06	20.3031	-24.5572	44.8603	10.5249	-10.7866
5509	-8.6901e+06	7.45201e+06	0.167493	-0.0685975	0.0478867	0.167209	-4.83066	12.9221	-20.746	361.032	75.7282	13.3851	62.0818	173.461	48.7254	166.187	54.6458	10.3538	22.2103	1398.81	20.638	-25.9809	46.6189	10.817	-11.4807
5510	-8.5901e+06	7.45201e+06	0.144525	-0.0610091	0.0400868	0.180985	-5.19435	13.0479	-21.7742	351.633	69.0155	12.0888	60.5911	166.433	42.8643	162.68	53.1647	10.8749	22.4454	1447.02	21.081	-27.3642	48.4451	11.2957	-11.1663
5511	-8.4901e+06	7.45201e+06	0.167238	-0.0707471	0.0473777	0.168198	-5.09015	13.2297	-21.6597	329.241	60.2736	10.5244	58.9857	154.337	37.2508	152.683	49.9577	11.0535	22.6307	1451.88	21.3514	-27.5099	48.8613	12.0795	-12.7888
5512	-8.3901e+06	7.45201e+06	0.192786	-0.0619263	0.037333	0.150618	-5.22336	13.1344	-21.7676	297.046	52.1405	8.93564	58.5049	139.273	32.8724	138.702	44.9874	11.0923	22.6432	1455.44	21.294	-27.7006	48.9946	12.6745	-14.1017
5513	-8.2901e+06	7.45201e+06	0.201541	-0.0672272	0.0352348	0.147027	-5.66949	13.4551	-23.5197	250.654	43.5827	7.28746	58.1828	117.422	27.7858	117.312	38.1584	11.8577	22.9511	1540.41	21.981	-29.5531	51.5341	13.2968	-14.6068
5514	-8.1901e+06	7.45201e+06	0.185614	-0.0682735	0.0383159	0.157087	-6.11005	13.6192	-25.0674	210.711	37.9159	5.66524	59.2284	101.084	22.6341	100.577	32.2996	12.4444	23.1206	1608.04	22.3551	-31.4299	53.785	12.9254	-13.0654
5515	-8.0901e+06	7.45201e+06	0.193082	-0.0607556	0.0322696	0.150881	-6.53167	13.0624	-25.3147	207.968	38.8683	5.156	62.8138	104.837	20.5649	104.265	31.1121	12.2542	22.88	1592.75	21.6261	-31.9451	53.5712	12.4644	-13.6366
5516	-7.9901e+06	7.45201e+06	0.199929	-0.0495255	0.0256707	0.144563	-7.29038	11.9647	-25.2265	243.821	44.9216	6.50298	64.1892	123.677	24.5829	123.504	35.8342	11.8977	22.7831	1544.67	20.2921	-31.9573	52.2494	11.7682	-15.93
5517	-7.8901e+06	7.45201e+06	0.228104	-0.049664	0.0298797	0.144682	-7.88557	11.2778	-25.2214	290.768	50.4969	9.07899	60.4816	141.045	31.8593	141.039	43.1545	11.5767	22.5913	1518.26	19.3882	-31.863	51.2512	11.2669	-17.8016
5518	-7.7901e+06	7.45201e+06	0.231291	-0.0620815	0.041837	0.165898	-7.6915	11.6051	-25.0041	316.436	52.0727	10.7288	54.3394	143.537	37.1139	143.496	49.4772	10.9247	21.4671	1522.16	19.4227	-31.4423	50.865	11.5326	-18.0379
5519	-7.6901e+06	7.45201e+06	0.231291	-0.0620815	0.041837	0.165898	-7.20759	11.7381	-23.7982	327.605	51.2998	12.7543	47.4732	138.362	43.4768	138.172	54.315	10.1045	20.5228	1479.09	19.2771	-29.9581	49.2352	11.3963	-17.5009
5520	-7.5901e+06	7.45201e+06	0.239895	-0.0671407	0.0383562	0.14666	-6.9315	12.1581	-23.8034	326.099	48.6574	14.2639	42.2998	129.918	47.4014	128.762	56.0278	10.0381	20.2373	1492.57	19.7362	-29.8581	49.5943	10.9178	-17.6109
5521	-7.4901e+06	7.45201e+06	0.197892	-0.0782987	0.037741	0.157806	-6.69825	13.1967	-24.9242	307.965	44.9088	14.1914	40.2042	120.259	46.8675	116.961	54.1811	10.4878	20.1568	1575.5	21.0907	-30.9336	52.0243	10.3654	-17.0933
5522	-7.3901e+06	7.45201e+06	0.250005	-0.0684096	0.0465288	0.16485	-6.61168	13.9894	-25.9776	286.999	41.6838	12.2013	40.7377	112.922	42.1287	109.291	52.4071	10.7042	19.8569	1649.82	22.0804	-31.8181	53.8985	11.0561	-11.5598
5523	-7.2901e+06	7.45201e+06	0.250005	-0.0684096	0.0465288	0.16485	-6.77947	13.8669	-26.2148	277.321	40.9206	10.1624	43.7857	112.552	36.2424	109.803	52.3946	10.363	19.3367	1656.81	21.7892	-31.7805	53.5697	11.6606	-10.0682
5524	-7.1901e+06	7.45201e+06	0.240082	-0.0649171	0.0498266	0.171663	-6.96925	13.3431	-25.8816	269.462	41.2902	9.18043	48.3159	113.545	31.8454	110.514	48.0698	9.69036	18.5835	1622.93	20.8773	-31.2301	52.1074	11.3331	-12.5033
5525	-7.0901e+06	7.45201e+06	0.229651	-0.0575322	0.0533198	0.177627	-7.00841	12.4562	-25.1245	261.799	41.3932	8.97092	51.822	113.985	30.2476	106.471	40.8645	9.03431	18.081	1556.45	19.571	-30.4002	49.9711	10.1501	-15.2733
5526	-6.9901e+06	7.45201e+06	0.213031	-0.0355122	0.0468534	0.194968	-6.96279	11.124	-24.1029	256.634	41.5784	9.26775	53.3303	113.77	30.3314	101.956	36.0731	8.6032	18.2376	1463.41	17.8866	-29.3599	47.2464	9.32632	-17.6858
5527	-6.8901e+06	7.45201e+06	0.213031	-0.0355122	0.0468534	0.194968	-7.01191	10.1204	-23.6353	250.762	41.9982	9.05907	54.0738	112.06	29.862	99.4579	33.6286	8.45607	18.5795	1405.45	16.6781	-28.9493	45.6274	8.72875	-19.3333
5528	-6.7901e+06	7.45201e+06	0.213031	-0.0355122	0.0468534	0.194968	-7.22437	9.69921	-24.029	241.7	42.2887	8.4109	54.9342	108.535	29.0446	96.6633	32.8668	8.33867	18.3623	1403.09	16.1404	-29.4338	45.5742	8.51399	-19.1079
5529	-6.6901e+06	7.45201e+06	0.208224	-0.0494071	0.0542566	0.191749	-7.92142	10.3632	-25.7715	239.107	43.5945	7.74722	56.2469	109.207	28.5112	96.4369	34.324	8.25539	17.1514	1492.34	17.0228	-31.2502	48.2729	8.82679	-19.6849
5530	-6.5901e+06	7.45201e+06	0.280255	-0.041953	0.0566998	0.210208	-9.13462	10.3729	-27.4137	246.148	44.4221	8.05768	55.2609	112.217	29.8304	98.9114	36.8119	8.1699	16.3046	1558.22	17.1842	-32.9461	50.1303	8.57489	-21.3356
5531	-6.4901e+06	7.45201e+06	0.241455	-0.00200063	0.0632642	0.244815	-10.0767	9.67734	-28.0633	247.755	43.0994	8.77131	53.5909	111.273	30.7595	98.5736	36.3818	7.92358	15.8495	1563.18	16.4387	-33.5493	49.9881	8.00844	-22.6923
5532	-6.3901e+06	7.45201e+06	0.223656	-0.0617346	0.034756	0.185655	-10.7461	8.76705	-28.1899	238.415	41.0569	8.65549	54.7944	107.772	28.8606	97.3316	31.3718	7.44142	15.2593	1540.47	15.3353	-33.435	48.7703	7.42445	-24.8111
5533	-6.2901e+06	7.45201e+06	0.212563	-0.0864885	0.0594915	0.200411	-11.3398	8.49308	-28.6981	226.002	40.2539	7.40178	59.7211	106.104	24.2387	97.178	24.7747	7.14088	14.6129	1552.07	15.1315	-33.7503	48.8817	7.13474	-27.7737
5534	-6.1901e+06	7.45201e+06	0.212563	-0.0864885	0.0594915	0.200411	-11.5173	8.80745	-29.1397	214.095	39.3983	6.19053	62.8441	103.262	20.4773	94.2651	20.5834	7.23031	14.4935	1582.55	15.7314	-34.1434	49.8748	7.34127	-29.0113
5535	-6.0901e+06	7.45201e+06	0.212563	-0.0864885	0.0594915	0.200411	-11.5136	9.00419	-29.3782	206.391	38.1168	5.78501	62.7448	99.2274	19.0029	90.4317	19.0779	7.54558	14.8872	1598.67	16.1865	-34.4682	50.6547	7.5112	-29.2775
5536	-5.9901e+06	7.45201e+06	0.212563	-0.0864885	0.0594915	0.200411	-11.6313	9.08755	-29.7761	199.441	36.7932	5.72369	62.0509	95.6081	18.4957	87.1618	18.5235	7.94643	15.3915	1613.86	16.6464	-34.9428	51.5892	7.53371	-29.6656
5537	-5.8901e+06	7.45201e+06	0.212563	-0.0864885	0.0594915	0.200411	-11.9419	9.06025	-30.249	193.563	35.7493	5.46506	62.8886	93.9491	17.7841	85.3605	17.7854	8.25648	15.6798	1628.81	17.2004	-35.4298	52.6301	7.44563	-30.109
5538	-5.7901e+06	7.45201e+06	0.189406	-0.0735163	0.0672831	0.214734	-12.2677	8.61108	-30.5691	186.991	34.5021	4.86747	65.5347	93.1798	15.9793	83.6859	15.9838	8.26171	15.6738	1626.46	16.879	-35.8263	52.7053	7.21052	-30.3617
5539	-5.6901e+06	7.45201e+06	0.136655	-0.0777478	0.0635304	0.194704	-12.6707	8.065	-31.0235	184.659	34.3269	4.2984	68.3401	94.5225	14.5281	83.6665	14.5492	8.10391	15.4364	1626.5	16.1368	-36.3627	52.4995	6.90063	-30.814
5540	-5.5901e+06	7.45201e+06	0.136655	-0.0777478	0.0635304	0.194704	-13.0294	7.71642	-31.5609	189.773	35.4436	4.37028	69.3494	98.2765	14.6559	85.9469	14.7223	7.93373	15.0968	1635.34	15.6699	-36.8843	52.5543	6.68313	-31.3545
5541	-5.4901e+06	7.45201e+06	0.136655	-0.0777478	0.0635304	0.194704	-13.2811	7.54367	-32.0243	202.025	37.8554	4.78894	68.4824	103.91	16.4041	90.1265	16.432	7.73339	14.6478	1646.57	15.5237	-37.2788	52.8025	6.59722	-31.8783
5542	-5.3901e+06	7.45201e+06	0.136655	-0.0777478	0.0635304	0.194704	-13.5472	7.39294	-32.3817	219.039	41.4402	5.61024	66.121	110.247	19.2034	96.5848	19.2142	7.55383	14.2274	1652.83	15.5229	-37.5763	53.0991	6.45592	-32.2574
5543	-5.2901e+06	7.45201e+06	0.136655	-0.0777478	0.0635304	0.194704	-13.8817	6.76011	-32.4198	238.815	45.3265	6.44222	63.7168	117.559	22.1244	104.654	22.1796	7.32897	14.005	1629.55	14.8028	-37.5636	52.3665	5.94735	-32.2835
5544	-5.1901e+06	7.45201e+06	0.136655	-0.0777478	0.0635304	0.194704	-13.5928	6.62014	-31.6541	254.408	48.458	6.85243	62.8444	123.829	23.5538	110.529	23.6341	6.99675	13.6805	1590.06	14.5852	-36.5487	51.1339	5.85145	-31.593
5545	-5.0901e+06	7.45201e+06	0.136655	-0.0777478	0.0635304	0.194704	-13.089	6.41663	-30.581	265.352	50.726	7.42024	61.2567	127.231	25.4765	114.181	25.5052	6.57912	13.408	1530.65	13.9156	-35.1391	49.0547	5.66186	-30.5673
5546	-4.9901e+06	7.45201e+06	0.181565	-0.0599571	0.0942823	0.23698	-12.9018	6.05137	-30.0772	275.379	51.1929	9.01892	56.3269	126.31	30.4668	113.691	30.5099	6.45624	13.4657	1493.92	13.3774	-34.5774	47.9548	5.26449	-29.8857
5547	-4.8901e+06	7.45201e+06	0.201599	-0.0766417	0.0977896	0.223615	-12.2041	5.81744	-29.017	277.101	47.8215	10.5302	48.483	117.304	35.4094	104.93	35.5339	6.53709	14.8163	1444.51	12.8538	-33.6024	46.4562	4.17614	-28.5481
5548	-4.7901e+06	7.45201e+06	0.150886	-0.044323	0.0888748	0.261662	-11.7963	5.40864	-28.1803	247.619	42.9505	8.79332	49.7561	105.175	29.7979	93.921	29.9514	6.64645	16.2243	1397.37	12.0354	-32.8732	44.9085	4.5816	-27.7157
5549	-4.6901e+06	7.45201e+06	0.150886	-0.044323	0.0888748	0.261662	-11.8815	5.35937	-28.196	225.135	41.4118	6.82778	55.4069	101.502	23.7598	89.1459	23.7627	6.68339	18.2185	1397.62	11.9475	-32.9465	44.894	4.93187	-28.1838
5550	-4.5901e+06	7.45201e+06	0.150886	-0.044323	0.0888748	0.261662	NA	NA	NA	NA	NA	NA	NA	NA	NA	NA	NA	NA	NA	NA	NA	NA	NA	NA	NA
5603	709904	7.45201e+06	0.0589215	-0.0152412	0.018535	0.206399	4.48985	11.7321	-1.58378	1829.85	219.577	93.072	28.3185	599.158	295.045	386.021	512.173	4.37496	22.533	553.627	15.3429	-4.04628	19.3892	4.26973	6.34235
5604	809904	7.45201e+06	0.0629028	-0.0374701	0.0138742	0.182825	0.629209	9.6418	-7.04848	1222.6	142.829	57.7769	27.7958	389.263	192.009	280.874	356.587	6.01541	23.7447	686.469	14.6225	-10.5886	25.2111	1.51906	1.8334
5605	909904	7.45201e+06	0.0774987	-0.0395717	0.0236327	0.206035	-1.58541	9.16803	-11.1978	699.451	93.1528	32.993	29.9322	236.461	113.593	227.824	170.886	7.97598	25.2483	830.753	15.2889	-16.2614	31.5503	7.86572	-4.1549
5606	1.0099e+06	7.45201e+06	0.0718735	-0.050901	0.0216236	0.191349	-1.19045	11.0029	-12.5942	605.018	93.8394	29.6743	37.2011	229.553	95.4767	229.482	113.466	8.84929	24.8075	955.917	17.3978	-18.2704	35.6682	10.9219	-7.3753
5607	1.1099e+06	7.45201e+06	0.0718735	-0.050901	0.0216236	0.191349	-0.426243	12.1927	-12.2968	571.543	86.5039	26.9293	38.9643	221.919	85.4095	221.797	101.735	9.4024	25.4256	990.193	18.8925	-18.0784	36.9709	12.0721	-6.88632
5608	1.2099e+06	7.45201e+06	0.0522211	-0.0672667	0.0159035	0.176022	0.734073	13.1555	-10.7779	572.938	76.0305	29.2815	31.9676	204.948	93.4537	200.371	109.869	9.08474	25.2501	966.644	19.8895	-16.0638	35.9533	12.0394	-5.68309
5609	1.3099e+06	7.45201e+06	0.0329136	-0.0716666	0.00132453	0.162999	0.765744	13.3792	-11.0452	557.389	68.2042	30.1217	27.7723	189.294	96.1887	179.132	114.331	8.44033	23.3952	984.231	19.7666	-16.2596	36.0262	11.604	-5.08122
5610	1.4099e+06	7.45201e+06	0.0269231	-0.0570212	-0.0110713	0.155754	0.561449	13.2055	-11.146	594.123	72.3993	31.6778	28.6532	202.275	101.009	192.868	120.085	8.12312	22.6409	979.238	19.5597	-16.2987	35.8584	11.2138	-4.61819
5611	1.5099e+06	7.45201e+06	0.0176321	-0.0392905	-0.0105314	0.149753	0.260954	12.983	-11.5052	574.022	72.5657	29.4689	30.224	200.489	93.3825	199.397	111.119	8.32196	22.8614	984.144	19.6643	-16.7187	36.383	12.6163	-6.47648
5612	1.6099e+06	7.45201e+06	0.0143975	-0.0596126	-0.00599758	0.143956	-0.36229	12.4482	-12.3173	588.531	75.663	30.3022	30.9423	208.444	94.9248	208.206	109.333	8.76187	23.4773	994.938	19.449	-17.8592	37.3082	12.1619	-7.16864
5613	1.7099e+06	7.45201e+06	0.0285275	-0.0663148	-0.00178294	0.140195	-0.439506	12.3215	-12.7178	559.881	76.1371	27.3549	34.2226	205.545	86.6991	205.358	97.6498	8.64729	22.8758	1007.67	19.3874	-18.4021	37.7894	12.1344	-7.39822
5614	1.8099e+06	7.45201e+06	0.0483314	-0.0552462	-0.00800903	0.153919	0.0582735	12.7371	-12.0693	533.077	69.2485	24.9273	33.6417	192.103	80.0506	189.484	93.0207	7.84159	21.49	995.041	19.2571	-17.2102	36.4673	11.5067	-6.92668
5615	1.9099e+06	7.45201e+06	0.0479562	-0.0525612	0.00526206	0.159777	0.382802	12.5973	-11.0636	503.886	65.004	22.2779	33.8058	177.993	73.9779	174.993	85.9226	7.14502	20.7635	951.768	18.5327	-15.8791	34.4119	11.3744	-6.88552
5616	2.0099e+06	7.45201e+06	0.0479562	-0.0525612	0.00526206	0.159777	NA	NA	NA	NA	NA	NA	NA	NA	NA	NA	NA	NA	NA	NA	NA	NA	NA	NA	NA
5617	2.1099e+06	7.45201e+06	0.0701398	-0.0686523	-0.00649981	0.170497	-0.663779	10.3484	-10.5437	456.077	61.3283	20.398	35.1256	164.874	68.2365	160.833	75.9617	6.83531	21.7269	855.348	15.7635	-15.6868	31.4503	9.54941	-7.85349
5618	2.2099e+06	7.45201e+06	0.0701398	-0.0686523	-0.00649981	0.170497	-1.28538	9.59483	-11.3656	442.393	59.5977	19.524	36.1465	161.548	66.2595	156.914	70.3495	6.83522	21.6779	864.341	15.0643	-16.4556	31.5199	9.06126	-9.99587
5619	2.3099e+06	7.45201e+06	0.132203	-0.0530633	-0.00903423	0.151715	NA	NA	NA	NA	NA	NA	NA	NA	NA	NA	NA	NA	NA	NA	NA	NA	NA	NA	NA
5620	2.4099e+06	7.45201e+06	0.132747	-0.0241195	-0.0301333	0.157451	-0.452269	10.9465	-11.551	463.141	59.4523	21.3345	35.6971	167.877	69.6672	160.136	76.9118	7.05058	21.1278	911.625	16.7534	-16.5316	33.2851	6.87216	-9.06092
5621	2.5099e+06	7.45201e+06	0.123935	-0.0340458	-0.0218394	0.15999	-0.789041	11.4746	-12.5627	490.203	65.158	22.7163	35.5823	179.261	72.8415	167.844	87.0769	7.62269	21.0784	971.137	18.1088	-18.0574	36.1662	7.41891	-8.23287
5622	2.6099e+06	7.45201e+06	0.123935	-0.0340458	-0.0218394	0.15999	-1.28482	11.5365	-13.7679	494.647	64.9345	22.4473	35.686	181.37	73.1984	168.122	87.2514	8.24839	21.6373	1019.98	18.6913	-19.4263	38.1176	6.83996	-8.74266
5623	2.7099e+06	7.45201e+06	0.123935	-0.0340458	-0.0218394	0.15999	-1.96078	11.3739	-14.9937	509.98	66.0701	24.0982	34.7445	185.252	77.7661	172.526	90.354	8.79355	21.8319	1060.44	19.2576	-21.0055	40.2631	5.81201	-10.0472
5624	2.8099e+06	7.45201e+06	0.134681	-0.0594929	-0.00303903	0.153164	-2.66924	11.0455	-16.316	523.774	66.9593	25.6612	33.1624	187.15	81.2122	178.017	95.066	9.29988	21.7799	1098.17	19.4393	-23.2411	42.6803	8.19769	-10.3346
5625	2.9099e+06	7.45201e+06	0.116152	-0.0438553	-0.0204821	0.150822	-2.68868	11.5045	-16.683	514.546	67.0521	24.4098	33.395	184.802	78.8269	178.71	92.7268	8.67454	20.4014	1131.73	19.5502	-22.9305	42.4806	10.2127	-10.7963
5626	3.0099e+06	7.45201e+06	0.127911	-0.0514983	-0.0155283	0.146596	-2.58869	11.902	-16.5633	512.286	66.4908	23.787	32.1631	180.965	79.0436	174.384	96.1972	7.86955	19.1371	1145.49	19.1996	-21.9089	41.1085	10.6128	-10.4313
5627	3.1099e+06	7.45201e+06	0.106012	-0.0638518	-0.025017	0.139588	-2.8691	11.8562	-17.0617	510.436	64.1909	23.7608	30.9846	178.639	78.7392	168.796	100.952	7.57521	18.6627	1162.23	18.8987	-21.6877	40.5864	10.3943	-10.6161
5628	3.2099e+06	7.45201e+06	0.106012	-0.0638518	-0.025017	0.139588	-3.24075	11.7739	-17.4739	503.165	62.4095	22.9173	32.1305	178.725	75.1018	167.399	98.7933	8.04278	19.0212	1177.88	19.4716	-22.7972	42.2688	10.3178	-11.0808
5629	3.3099e+06	7.45201e+06	0.103301	-0.055486	-0.0220113	0.157843	-3.7896	11.412	-18.0405	509.688	65.9386	23.1978	33.6053	184.434	75.6035	174.143	96.3501	8.75441	19.8117	1188.97	20.0487	-24.1302	44.1789	10.1165	-11.7037
5630	3.4099e+06	7.45201e+06	0.126469	-0.06797	-0.017675	0.149743	-4.27775	11.1818	-18.7321	529.459	68.8289	25.1322	33.3687	190.577	80.7655	181.262	95.7324	9.13446	20.2458	1208.58	19.9604	-25.1566	45.117	9.92272	-13.1411
5631	3.5099e+06	7.45201e+06	0.0919078	-0.058118	-0.0142377	0.155251	-5.07822	10.5191	-19.3178	570.739	72.1458	27.8546	32.3784	203.685	89.5791	197.853	100.61	9.1332	20.4503	1206.71	19.0823	-25.5738	44.6561	9.33524	-15.6268
5632	3.6099e+06	7.45201e+06	0.071347	-0.0658188	0.00303267	0.152669	-5.40388	10.3038	-19.6631	575.166	74.9485	27.6492	34.42	210.849	89.7983	206.623	97.2947	8.76649	19.7702	1210.77	18.4616	-25.8577	44.3193	9.19355	-17.2614
5633	3.7099e+06	7.45201e+06	0.0905816	-0.0851686	0.0179966	0.154535	-5.43482	11.3559	-21.2105	491.154	70.4403	21.4633	41.0043	192.051	69.982	188.905	76.1233	8.6445	18.5624	1317.25	19.0882	-27.466	46.5543	10.394	-19.1399
5634	3.8099e+06	7.45201e+06	0.0798646	-0.0880031	0.0124883	0.140659	-5.54446	11.4207	-21.0749	444.876	66.6392	18.6397	42.6901	176.026	61.5056	174.038	68.1278	8.48965	18.2798	1326.24	19.4211	-27.005	46.426	10.7674	-18.9365
5635	3.9099e+06	7.45201e+06	0.0660431	-0.0813554	0.00832973	0.144825	-5.86404	11.5466	-21.8811	432.521	63.9689	18.6691	40.745	167.667	61.1259	164.107	68.6785	8.84389	18.5457	1362.26	20.0643	-27.7585	47.8228	10.7486	-19.2066
5636	4.0099e+06	7.45201e+06	0.0660431	-0.0813554	0.00832973	0.144825	-6.27945	11.2688	-22.4973	433.526	63.0207	18.9377	39.913	166.324	61.7711	161.407	69.9121	8.81889	19.0089	1375.28	19.8956	-28.2633	48.1589	10.3336	-18.8544
5637	4.1099e+06	7.45201e+06	0.0963764	-0.0853021	0.0126356	0.153729	-6.86815	11.1743	-23.3187	431.609	63.1047	18.9854	39.9245	165.7	62.4145	160.816	69.4194	8.32686	17.2807	1409.46	19.2065	-28.9608	48.1674	10.4081	-19.9178
5638	4.2099e+06	7.45201e+06	0.089205	-0.0798075	0.0223293	0.161077	-7.17882	11.3671	-23.9207	435.382	64.8949	19.3709	40.1498	168.458	63.8397	162.323	69.8307	8.11326	16.7152	1441.66	19.0785	-29.4587	48.5372	10.5177	-21.8505
5639	4.3099e+06	7.45201e+06	0.0728932	-0.0714334	0.0177145	0.166962	-7.37112	11.5492	-24.336	446.34	66.9566	20.5032	39.4211	171.18	66.1323	166.435	74.3356	8.20881	16.6469	1465.25	19.4464	-29.8664	49.3128	10.5727	-20.1663
5640	4.4099e+06	7.45201e+06	0.0890236	-0.0653889	0.00676854	0.181045	-7.46475	11.8116	-24.7136	464.525	67.6013	22.1869	37.157	172.517	69.6807	169.929	81.9113	8.44426	16.7602	1490.52	20.0009	-30.3815	50.3825	10.7154	-18.469
5641	4.5099e+06	7.45201e+06	0.0736648	-0.0595847	0.00132281	0.188386	-7.47661	12.0055	-24.9139	475.648	66.4194	22.9049	35.7218	173.049	71.9138	170.919	84.9033	8.66128	16.9277	1506.14	20.419	-30.7453	51.1643	10.1784	-18.1995
5642	4.6099e+06	7.45201e+06	0.0807852	-0.0498677	-0.00533005	0.192171	-7.40008	12.209	-25.0348	476.46	64.3876	22.2189	35.543	172.503	71.6566	168.099	84.3431	8.88086	17.1643	1518.03	20.7383	-30.9946	51.7328	7.98696	-19.1215
5643	4.7099e+06	7.45201e+06	0.0750677	-0.0598541	-9.63856e-05	0.17894	-7.48524	12.3769	-25.5569	489.33	63.1003	22.9283	34.2158	175.021	74.8436	165.443	88.9263	9.48209	17.9343	1545.45	21.099	-31.7533	52.8524	4.96351	-21.1868
5644	4.8099e+06	7.45201e+06	0.0778487	-0.0652986	-0.00497031	0.159496	-7.50773	12.5422	-25.9651	511.765	64.4558	23.6841	33.9338	183.145	77.4931	168.164	95.4722	9.55272	17.9047	1567.43	21.2136	-32.1047	53.3183	3.41973	-20.5319
5645	4.9099e+06	7.45201e+06	0.0778487	-0.0652986	-0.00497031	0.159496	-7.31862	12.7675	-25.93	532.244	67.1614	23.9986	35.0479	192.41	77.5297	175.854	99.3542	8.86403	16.7656	1572.28	21.2444	-31.5806	52.825	3.98854	-17.9322
5646	5.0099e+06	7.45201e+06	0.0908435	-0.0722498	-0.000516892	0.154991	-7.98062	12.1524	-26.6677	548.081	69.9217	24.1875	35.8744	198.98	78.1856	187.3	100.027	9.18318	17.1951	1579.43	21.111	-32.2827	53.3937	6.2041	-18.2106
5647	5.1099e+06	7.45201e+06	0.0972641	-0.06731	-0.000619654	0.167361	-9.22811	11.2963	-28.6415	541.656	70.713	23.3486	37.1166	199.356	75.8099	195.081	96.4201	9.84869	17.7861	1626.32	20.9008	-34.4708	55.3715	8.95275	-19.8712
5648	5.2099e+06	7.45201e+06	0.117269	-0.0687038	0.0232864	0.189429	-10.2667	10.6917	-30.48	517.084	70.6988	21.189	40.0251	197.991	69.6329	197.415	88.7496	10.4491	18.1781	1677.77	20.5996	-36.8829	57.4825	10.2684	-21.3618
5649	5.3099e+06	7.45201e+06	0.130729	-0.0765587	0.027353	0.183148	-11.0929	10.2128	-31.7385	494.08	71.3949	19.5109	42.8597	196.847	64.4841	196.839	80.6262	10.768	18.35	1710.79	20.1664	-38.5175	58.6839	10.2023	-24.1716
5650	5.4099e+06	7.45201e+06	0.130729	-0.0765587	0.027353	0.183148	-11.7067	9.97273	-32.7204	466.919	71.2882	17.5061	45.3494	190.808	58.6074	190.808	71.645	10.9112	18.3684	1741.04	19.8558	-39.5471	59.403	9.97273	-27.9749
5651	5.5099e+06	7.45201e+06	0.117269	-0.0687038	0.0232864	0.189429	-12.1071	10.0164	-33.6756	428.807	69.4973	14.6706	49.1977	181.437	50.1164	181.437	60.4523	11.2035	18.5163	1781.84	19.8831	-40.6212	60.5043	10.0164	-30.3041
5652	5.6099e+06	7.45201e+06	0.126529	-0.0604074	0.0177517	0.204942	-12.1529	10.481	-34.3798	379.959	65.8128	11.4947	54.6573	169.111	40.5662	169.111	48.3993	11.5562	18.6505	1829.76	20.3274	-41.633	61.9604	10.481	-31.0469
5653	5.7099e+06	7.45201e+06	0.126529	-0.0604074	0.0177517	0.204942	-12.0441	10.9743	-34.5823	341.027	63.1568	8.92066	60.6201	160.511	32.481	160.511	38.3218	11.6613	18.5855	1858.51	20.6541	-42.0891	62.7432	10.9743	-31.1045
5654	5.8099e+06	7.45201e+06	0.126529	-0.0604074	0.0177517	0.204942	-12.0565	11.1981	-34.7147	322.742	62.17	7.72234	63.9872	156.881	28.2872	156.881	32.5922	11.7184	18.5485	1874.03	20.8216	-42.3544	63.176	11.1981	-31.1727
5655	5.9099e+06	7.45201e+06	0.126529	-0.0604074	0.0177517	0.204942	-12.1469	11.2221	-34.8828	321.037	61.5965	7.57246	63.8661	156.216	27.6925	156.216	31.4003	11.7903	18.6028	1883.99	20.8956	-42.4791	63.3748	11.2221	-31.3507
5656	6.0099e+06	7.45201e+06	0.126529	-0.0604074	0.0177517	0.204942	-12.1801	11.2776	-35.0533	326.664	59.9215	8.11917	61.4092	155.815	29.1189	155.815	32.9062	11.7219	18.4606	1895.54	20.9449	-42.542	63.4869	11.2776	-31.5282
5657	6.1099e+06	7.45201e+06	0.126529	-0.0604074	0.0177517	0.204942	-12.1271	11.3734	-35.0158	332.887	57.9401	8.58633	59.3852	156.17	30.4767	156.17	34.3836	11.4009	18.0174	1900.08	20.9568	-42.2995	63.2563	11.3734	-31.4944
5658	6.2099e+06	7.45201e+06	0.126529	-0.0604074	0.0177517	0.204942	-11.9488	11.592	-34.8246	333.096	56.5201	8.56943	59.1721	156.114	30.381	156.114	34.7187	11.0411	17.553	1902.35	21.0939	-41.7972	62.8911	11.592	-31.228
5659	6.3099e+06	7.45201e+06	0.111131	-0.0508257	0.0127372	0.21299	-12.2155	11.6151	-35.4304	326.765	56.9481	8.2643	61.0177	156.195	29.2614	156.195	33.6896	11.2409	17.6867	1929.63	21.2568	-42.2558	63.5126	11.6151	-31.6799
5660	6.4099e+06	7.45201e+06	0.111131	-0.0508257	0.0127372	0.21299	-12.7252	11.6518	-36.8588	309.294	56.1007	7.60784	62.5557	149.989	27.076	149.989	31.3109	12.1758	18.5583	1992.95	21.6281	-43.9186	65.5467	11.6518	-32.8471
5661	6.5099e+06	7.45201e+06	0.111131	-0.0508257	0.0127372	0.21299	-13.0383	11.8309	-37.978	288.122	51.7916	7.22038	61.2971	137.427	25.2972	137.427	29.8181	12.7043	18.8971	2048.88	21.9517	-45.2802	67.2319	11.8309	-33.7528
5662	6.6099e+06	7.45201e+06	0.137822	-0.0476714	0.0119049	0.221926	-12.8308	12.2972	-38.2695	271.815	46.1598	7.45528	57.4291	123.546	25.3388	123.546	29.7807	12.3122	18.1749	2080.64	22.1755	-45.5506	67.7262	12.2972	-33.8517
5663	6.7099e+06	7.45201e+06	0.142614	-0.0461721	0.00667469	0.206175	-12.3145	12.7674	-37.8439	267.516	43.9667	7.39774	55.1647	117.26	25.3956	117.26	29.996	11.4449	17.0783	2082.33	22.237	-44.7183	66.9553	12.7674	-33.277
5664	6.8099e+06	7.45201e+06	0.142614	-0.0461721	0.00667469	0.206175	-11.7515	13.2766	-37.2445	273.466	44.8249	7.65746	54.6391	118.443	26.3654	118.442	30.4597	10.5805	16.0445	2078.59	22.3421	-43.539	65.8811	13.2761	-32.5486
5665	6.9099e+06	7.45201e+06	0.157107	-0.054338	0.00497957	0.198773	-11.432	13.6332	-36.7825	284.232	46.9022	8.47856	55.6665	124.295	27.99	124.295	31.861	10.0946	15.5028	2076.39	22.2547	-42.8209	65.0755	13.6328	-32.1144
5666	7.0099e+06	7.45201e+06	0.19306	-0.079499	0.0192136	0.178892	-11.4733	13.3192	-36.2437	305.148	49.7612	9.19546	56.5939	135.347	29.8869	135.347	34.3579	9.94508	15.5925	2047.26	21.3194	-42.4492	63.7686	13.3192	-31.7537
5667	7.1099e+06	7.45201e+06	0.202251	-0.0730824	-9.63561e-05	0.164998	-12.1708	12.0132	-35.5074	341.467	55.8106	10.0876	58.3	156.157	32.3389	156.157	36.4913	9.68816	15.8123	1969.68	19.7257	-41.6059	61.3316	12.0132	-31.5309
5668	7.2099e+06	7.45201e+06	0.191959	-0.0670441	0.00111479	0.169872	-12.8146	11.0509	-35.2213	363.816	61.3881	10.2431	61.5296	172.982	32.7184	172.982	36.5542	9.74428	16.2761	1920.15	18.953	-40.9656	59.9187	11.0509	-31.6489
5669	7.3099e+06	7.45201e+06	0.196139	-0.0741267	-0.00227401	0.162417	-13.5023	10.4952	-35.8427	362.641	64.0547	9.36251	65.8948	180.024	30.2519	180.024	34.3806	10.1914	16.9412	1923.37	18.885	-41.266	60.1511	10.4952	-32.4972
5670	7.4099e+06	7.45201e+06	0.183317	-0.0701605	0.00283159	0.178589	-13.8346	10.9274	-37.4176	324.054	59.8653	7.5394	69.8797	166.853	24.9843	166.853	29.3227	10.8882	17.4086	2008.06	19.8633	-42.699	62.5623	10.9274	-33.9166
5671	7.5099e+06	7.45201e+06	0.17375	-0.0797749	0.00914098	0.187292	-14.2228	11.4184	-39.057	279.046	54.1282	5.95001	73.8046	149.899	20.3103	149.899	24.4236	11.4603	17.6074	2100.72	20.8018	-44.3115	65.1133	11.4184	-35.4814
5672	7.6099e+06	7.45201e+06	0.185479	-0.085789	0.00754286	0.181412	-14.9266	11.1488	-40.0921	261.379	53.7776	5.34314	78.1986	146.836	18.174	146.836	21.3823	11.7573	17.7641	2139	20.7998	-45.4039	66.2037	11.1488	-36.7436
5673	7.7099e+06	7.45201e+06	0.189882	-0.0690388	0.00517055	0.181361	-15.2465	10.6292	-39.7412	267.153	58.3272	5.2934	82.8267	155.752	17.7399	155.752	20.1534	11.7044	17.9234	2105.9	20.2817	-45.0587	65.3404	10.6292	-36.7036
5674	7.8099e+06	7.45201e+06	0.141524	-0.0562048	0.00275286	0.187107	-15.4144	10.0374	-38.9267	278.387	64.1447	5.36609	87.0473	167.165	17.854	167.165	19.8793	11.4467	18.0152	2047.2	19.4823	-44.1043	63.5866	10.0374	-35.7738
5675	7.9099e+06	7.45201e+06	0.141524	-0.0562048	0.00275286	0.187107	-15.6053	9.68425	-38.6384	279.526	66.1478	5.22319	88.9781	170.513	18.1968	170.513	20.9398	11.2426	18.0087	2019.9	18.9017	-43.5607	62.4624	9.68425	-33.9825
5676	8.0099e+06	7.45201e+06	0.136159	-0.0495463	0.0120513	0.19579	-15.5159	10.0224	-38.9696	268.534	62.9628	4.84669	87.5615	162.98	18.6497	162.98	23.2476	11.253	17.932	2047.32	19.0297	-43.7625	62.7922	10.0224	-32.1314
5677	8.1099e+06	7.45201e+06	0.173769	-0.0715627	0.013084	0.177559	-15.0387	10.7796	-39.1107	257.793	58.3164	4.93822	82.8541	151.573	19.7737	151.573	27.005	11.3596	17.9106	2082.78	19.5589	-43.9023	63.4611	10.7796	-29.3186
5678	8.2099e+06	7.45201e+06	0.162402	-0.0638136	0.00863947	0.183401	-14.4	11.2302	-38.2982	252.356	54.9575	5.2946	77.4035	142.27	21.0476	142.263	31.1271	11.3699	18.0615	2065	19.8115	-43.167	62.9785	11.2138	-25.9495
5679	8.3099e+06	7.45201e+06	0.162402	-0.0638136	0.00863947	0.183401	-13.698	11.4137	-36.9119	249.559	52.1136	5.77209	72.0201	134.482	22.7005	134.285	34.3404	11.2101	18.1282	2012.18	19.9103	-41.9178	61.8281	11.0733	-22.3809
5680	8.4099e+06	7.45201e+06	0.177021	-0.0572211	0.0146747	0.194973	-12.8505	11.8391	-35.7241	246.901	48.4301	6.30959	65.8588	125.778	24.4234	124.941	36.9605	10.7694	17.6828	1977.49	20.1682	-40.7188	60.887	10.7086	-18.7356
5681	8.5099e+06	7.45201e+06	0.169656	-0.0502329	-0.0203993	0.17908	-12.138	12.4563	-35.127	245.477	44.4876	6.61051	59.4844	117.471	25.8997	115.597	39.7452	10.2343	16.8992	1976.59	20.6658	-39.9256	60.5914	10.4578	-15.4995
5682	8.6099e+06	7.45201e+06	0.157121	-0.0553349	-0.00116886	0.195212	-12.1073	12.4757	-35.1888	246.07	42.7724	6.84089	55.7188	112.916	26.8323	111.148	41.8861	10.0703	16.6323	1980.96	20.795	-39.7918	60.5868	10.2981	-15.3411
5683	8.7099e+06	7.45201e+06	0.163123	-0.0636852	-0.00486085	0.185922	-12.5694	11.8825	-35.4262	243.755	43.2589	6.78402	56.1793	111.701	26.394	110.719	42.1906	10.3669	17.1688	1968.51	20.4658	-39.9391	60.405	10.392	-15.8939
5684	8.8099e+06	7.45201e+06	0.18608	-0.0768893	0.0055379	0.172999	-13.0023	11.2033	-35.5284	242.17	45.2142	6.70858	58.3624	112.888	25.7602	112.621	41.0501	10.6944	17.82	1946.14	19.9294	-40.0974	60.0268	10.6826	-16.4852
5685	8.9099e+06	7.45201e+06	0.165159	-0.0808617	-0.005808	0.162098	-12.832	11.1117	-35.2621	240.142	46.1185	6.68245	59.6477	113.13	25.145	112.767	39.3504	10.9306	18.2551	1930.01	19.8563	-40.0229	59.8792	10.5791	-18.2471
5686	9.0099e+06	7.45201e+06	0.183991	-0.0915854	0.0127261	0.162397	-12.443	11.1692	-34.4975	241.205	45.9602	7.04645	59.7222	114.075	25.3997	113.077	38.5812	11.0008	18.5264	1898.68	19.9314	-39.449	59.3804	10.2518	-19.1744
5687	9.1099e+06	7.45201e+06	0.168457	-0.0836339	0.0111831	0.177133	-12.2446	10.9401	-33.3973	246.08	45.4499	7.55202	58.6758	115.848	26.3716	114.028	39.4671	11.0141	18.9239	1844	19.7477	-38.4657	58.2134	9.43809	-20.532
5688	9.2099e+06	7.45201e+06	0.156893	-0.0763319	0.00666824	0.182958	-12.4276	10.3468	-32.4278	256.052	45.5292	8.22652	56.4462	118.433	28.687	116.362	42.2458	11.0417	19.4433	1783.26	19.1969	-37.6052	56.8022	8.54469	-20.4523
5689	9.3099e+06	7.45201e+06	0.130293	-0.0641004	0.00262773	0.196847	-12.8759	9.73069	-32.0623	268.931	46.1591	8.9723	53.8039	121.015	31.7362	119.759	45.8353	11.0621	19.7729	1747.62	18.5547	-37.3921	55.9468	8.20557	-20.6677
5690	9.4099e+06	7.45201e+06	0.115693	-0.0550718	-0.00280802	0.204223	-13.232	9.22563	-31.7601	287.812	47.9762	10.2835	51.3545	126.001	35.9176	125.577	49.9148	10.9046	19.7917	1719.39	18.0023	-37.0822	55.0845	8.37802	-20.3386
5691	9.5099e+06	7.45201e+06	0.115693	-0.0550718	-0.00280802	0.204223	-12.8268	9.40759	-30.9314	304.328	50.0741	11.7572	49.3408	130.254	39.4537	129.657	53.8291	10.6352	19.6502	1694.59	18.077	-36.0513	54.1283	8.48219	-18.8472
5692	9.6099e+06	7.45201e+06	0.114136	-0.059563	-0.00455905	0.173059	-11.9149	9.74164	-29.4874	316.826	51.8473	13.1067	47.4156	132.936	43.1139	131.17	56.8758	10.3655	19.6967	1647.79	18.2444	-34.436	52.6804	7.98552	-17.9928
5693	9.7099e+06	7.45201e+06	0.135996	-0.0573164	-0.00587778	0.178862	-10.9152	9.7336	-27.4711	321.549	52.8091	13.566	46.9511	134.227	44.7791	132.003	58.6585	10.0936	20.0267	1565.16	18.0209	-32.3903	50.4112	7.63959	-17.6575
5694	9.8099e+06	7.45201e+06	0.144413	-0.0642843	0.00949152	0.18654	-10.3283	9.35841	-25.897	322.311	52.459	13.9545	46.048	133.899	45.3578	131.029	61.0847	9.58517	19.8396	1488.06	17.3017	-30.8525	48.1542	7.48363	-16.6523
5695	9.9099e+06	7.45201e+06	0.110855	-0.0652707	-0.00727072	0.16472	-10.123	8.70983	-24.9675	330.249	51.5816	14.7235	42.8072	133.277	47.5681	129.084	66.5113	8.79663	19.0107	1427.61	16.1457	-29.9229	46.0686	7.08409	-15.6525
5696	1.00099e+07	7.45201e+06	0.131936	-0.0939926	0.0378435	0.170632	-9.71793	8.28777	-23.8562	350.551	52.5033	15.6457	39.4331	136.477	51.0347	131.002	74.4373	8.06574	18.315	1366.22	15.2011	-28.7187	43.9199	6.86652	-15.1719
5697	1.01099e+07	7.45201e+06	0.11603	-0.0953545	0.0299139	0.172394	-8.99671	8.29183	-22.7588	372.917	54.7654	16.5648	37.3955	141.593	54.5774	133.867	82.1614	7.60676	17.9874	1318.25	14.7823	-27.4745	42.2568	7.00579	-14.089
5698	1.02099e+07	7.45201e+06	0.108773	-0.0895676	0.0417149	0.181593	NA	NA	NA	NA	NA	NA	NA	NA	NA	NA	NA	NA	NA	NA	NA	NA	NA	NA	NA
5699	1.03099e+07	7.45201e+06	0.167258	-0.0865022	0.0427817	0.198112	NA	NA	NA	NA	NA	NA	NA	NA	NA	NA	NA	NA	NA	NA	NA	NA	NA	NA	NA
5852	-1.04901e+07	7.35201e+06	0.217329	-0.0972948	0.0253593	0.12175	NA	NA	NA	NA	NA	NA	NA	NA	NA	NA	NA	NA	NA	NA	NA	NA	NA	NA	NA
5853	-1.03901e+07	7.35201e+06	0.217329	-0.0972948	0.0253593	0.12175	NA	NA	NA	NA	NA	NA	NA	NA	NA	NA	NA	NA	NA	NA	NA	NA	NA	NA	NA
5854	-1.02901e+07	7.35201e+06	0.202502	-0.0840189	0.033305	0.16403	NA	NA	NA	NA	NA	NA	NA	NA	NA	NA	NA	NA	NA	NA	NA	NA	NA	NA	NA
5855	-1.01901e+07	7.35201e+06	0.197276	-0.0741154	0.0520916	0.177887	-5.93373	7.11419	-17.0994	598.541	81.768	28.2841	35.9883	209.504	90.3214	170.813	118.387	6.19366	19.1523	1019.25	12.1294	-20.8969	33.0264	1.755	-7.12357
5856	-1.00901e+07	7.35201e+06	0.197276	-0.0741154	0.0520916	0.177887	-6.49262	6.87662	-18.068	585.287	77.3435	27.9768	34.9451	205.477	89.0788	163.189	115.5	6.02103	17.9192	1046.81	12.0038	-21.7473	33.7512	1.03001	-7.08797
5857	-9.9901e+06	7.35201e+06	0.197276	-0.0741154	0.0520916	0.177887	-6.60009	6.89139	-18.6215	525.224	70.6494	24.7208	35.6625	185.675	78.8249	147.3	103.586	5.94003	17.3703	1070.78	11.9766	-22.2426	34.2192	2.41919	-6.28289
5858	-9.8901e+06	7.35201e+06	0.197276	-0.0741154	0.0520916	0.177887	NA	NA	NA	NA	NA	NA	NA	NA	NA	NA	NA	NA	NA	NA	NA	NA	NA	NA	NA
5859	-9.7901e+06	7.35201e+06	0.203839	-0.0952131	0.0546414	0.165138	NA	NA	NA	NA	NA	NA	NA	NA	NA	NA	NA	NA	NA	NA	NA	NA	NA	NA	NA
5860	-9.6901e+06	7.35201e+06	0.192979	-0.0996087	0.0588465	0.177802	-4.41502	8.32745	-15.93	419.786	79.5702	16.1607	58.474	198.381	53.0542	163.655	62.8758	6.74336	20.325	1014.57	13.3475	-20.3418	33.6893	7.44655	-8.73349
5861	-9.5901e+06	7.35201e+06	0.192979	-0.0996087	0.0588465	0.177802	-4.25318	9.24967	-16.2331	422.046	82.557	16.9845	59.9862	201.723	55.7805	161.09	64.3255	7.43098	20.9852	1065.43	14.8008	-20.8885	35.6893	8.43728	-8.29846
5862	-9.4901e+06	7.35201e+06	0.201117	-0.100532	0.0622473	0.179853	-4.0438	10.0913	-16.2889	413.938	85.3182	16.2938	62.5752	202.324	54.8827	160.463	63.3398	7.7289	20.8572	1101.45	16.1532	-20.8673	37.0205	8.95449	-8.90415
5863	-9.3901e+06	7.35201e+06	0.182973	-0.0798715	0.0664091	0.178477	-4.03426	10.724	-16.9103	388.639	82.7382	14.8819	64.6546	194.203	50.926	158.187	59.4075	8.07107	20.634	1149.61	17.2093	-21.8568	39.066	9.29127	-8.10588
5864	-9.2901e+06	7.35201e+06	0.160248	-0.0812628	0.0651897	0.172888	-3.99841	11.3818	-17.738	360.676	75.6931	13.8776	63.3389	179.393	47.5257	154.438	55.8168	8.57099	20.6961	1209.33	18.1109	-23.3167	41.4276	9.64388	-6.68995
5865	-9.1901e+06	7.35201e+06	0.160979	-0.0891366	0.0641673	0.156787	-3.73509	12.3306	-18.4428	343.378	70.0816	12.9775	60.554	166.285	46.3705	151.818	54.9874	8.72932	20.2233	1276.58	18.9546	-24.2871	43.2418	10.3155	-6.22775
5866	-9.0901e+06	7.35201e+06	0.146733	-0.0702628	0.0473435	0.162344	-3.35465	13.2453	-18.6078	345.497	71.3334	13.2495	60.7509	166.354	47.2611	158.278	55.0135	8.9156	20.0958	1323.63	19.9086	-24.4425	44.3511	11.1451	-7.25777
5867	-8.9901e+06	7.35201e+06	0.15565	-0.0624478	0.0408261	0.15578	-3.32169	13.5628	-18.7905	363.925	77.8824	13.808	64.0223	178.501	48.5222	173.595	55.1838	9.44368	20.8664	1345.96	20.6582	-24.4925	45.1507	11.6406	-10.634
5868	-8.8901e+06	7.35201e+06	0.14244	-0.0459387	0.0355438	0.178263	-3.6065	13.8054	-19.9311	375.961	80.0797	13.015	66.3725	186.697	46.3583	183.028	54.6262	10.3418	21.8327	1400.31	21.5227	-25.7306	47.2533	12.1921	-12.5419
5869	-8.7901e+06	7.35201e+06	0.157371	-0.038166	0.0129584	0.164677	-3.78869	13.9921	-20.8238	361.371	73.354	11.0518	66.9797	180.909	39.9993	178.721	51.7351	10.9937	22.4267	1443.79	22.0564	-26.9041	48.9605	12.9578	-12.8191
5870	-8.6901e+06	7.35201e+06	0.157371	-0.038166	0.0129584	0.164677	-3.84233	13.7745	-20.62	338.026	63.6428	9.57155	64.5953	167.709	35.317	167.185	49.7065	11.1134	22.8523	1427.37	21.8809	-26.7694	48.6503	13.5097	-12.0177
5871	-8.5901e+06	7.35201e+06	0.177261	-0.0516996	0.0151754	0.156162	-3.9083	13.3464	-20.0316	313.333	57.7306	8.24125	65.1983	157.314	31.6547	157.286	46.1463	11.2996	23.6661	1389.59	21.4977	-26.3098	47.8075	13.3017	-11.7663
5872	-8.4901e+06	7.35201e+06	0.20307	-0.0656223	0.0212689	0.14334	-5.02043	12.1516	-20.5916	282.718	55.5914	7.16573	72.1186	151.358	27.7543	151.357	37.7397	11.3682	23.9555	1369.48	20.4522	-27.0286	47.4808	12.1494	-13.077
5873	-8.3901e+06	7.35201e+06	0.195138	-0.0594747	0.0180741	0.146869	-6.22386	11.4101	-22.4022	252.74	53.0738	6.20411	77.032	141.796	23.5602	141.796	29.9694	11.4476	23.4864	1410.71	19.844	-28.908	48.752	11.4101	-14.8515
5874	-8.2901e+06	7.35201e+06	0.195138	-0.0594747	0.0180741	0.146869	-6.09798	12.257	-23.7592	246.234	50.8152	5.8276	73.5218	134.482	21.5791	134.479	30.0637	11.8255	23.1027	1492.95	20.8496	-30.3457	51.1954	12.2531	-15.1338
5875	-8.1901e+06	7.35201e+06	0.203322	-0.0615274	0.022178	0.141637	-6.61296	11.5299	-23.7603	284.482	55.0887	7.55981	67.388	147.159	27.8606	147.155	39.6597	11.856	23.4417	1461.87	20.0598	-30.5744	50.6341	11.5249	-15.6298
5876	-8.0901e+06	7.35201e+06	0.18694	-0.0488314	0.0141228	0.149969	-7.53454	10.345	-23.7573	332.496	60.2146	9.65251	60.7741	162.421	37.3114	162.421	52.335	11.9028	23.9697	1417.4	18.77	-30.9418	49.7118	10.345	-16.739
5877	-7.9901e+06	7.35201e+06	0.213995	-0.0540813	0.0315512	0.156153	-7.50851	10.0714	-23.1312	352.718	61.0583	11.4314	54.952	163.446	42.2614	163.446	58.2082	11.597	23.8328	1383.02	18.21	-30.4303	48.6403	10.0714	-16.6008
5878	-7.8901e+06	7.35201e+06	0.213995	-0.0540813	0.0315512	0.156153	-7.08704	10.0547	-22.0445	355.421	59.5874	13.2505	50.2345	156.902	46.2302	156.902	59.2084	10.8156	23.0353	1337.16	17.8308	-29.1182	46.949	10.0527	-15.9286
5879	-7.7901e+06	7.35201e+06	0.19691	-0.0486699	0.0260675	0.149188	-7.08715	10.0371	-22.0006	355.798	58.563	14.1496	47.4694	152.189	49.0822	152.128	59.9809	10.4098	22.429	1333.92	17.6574	-28.8735	46.5309	9.92099	-15.7743
5880	-7.6901e+06	7.35201e+06	0.19502	-0.0480501	0.0202717	0.148368	-7.70642	9.27732	-22.2879	362.248	60.0431	15.2691	47.0087	155.461	52.2629	155.357	62.1176	10.3553	22.655	1318.53	16.8482	-28.9859	45.8341	9.08806	-16.403
5881	-7.5901e+06	7.35201e+06	0.209947	-0.0589466	0.0198841	0.127097	-7.72515	9.84745	-23.0468	363.317	59.7391	15.3691	46.8355	156.311	52.7075	156.113	63.786	10.4928	22.3429	1372.68	17.5184	-29.5146	47.033	9.59326	-16.5077
5882	-7.4901e+06	7.35201e+06	0.184708	-0.0583378	0.022757	0.141353	-7.19023	11.416	-23.9258	356.892	56.8968	14.7019	46.5631	152.857	50.2266	152.372	63.0205	10.4808	21.321	1470.5	19.1884	-30.0351	49.2235	10.9004	-14.9831
5883	-7.3901e+06	7.35201e+06	0.231988	-0.0831097	0.0478983	0.156559	-6.07646	13.9796	-25.1726	317.181	48.4244	11.5369	48.3221	135.453	39.9159	134.604	54.025	10.2483	19.508	1620.53	21.7364	-30.8035	52.5399	13.1682	-13.3794
5884	-7.2901e+06	7.35201e+06	0.212857	-0.0679038	0.0413454	0.167076	-5.85456	14.0436	-24.7584	294.906	46.3053	9.90358	52.4746	129.267	33.9753	127.028	45.3947	9.56501	18.531	1605.35	21.481	-30.1116	51.5926	12.5892	-15.6647
5885	-7.1901e+06	7.35201e+06	0.212857	-0.0679038	0.0413454	0.167076	-5.95049	13.3374	-24.3311	283.85	45.7437	10.1936	53.566	126.155	33.2375	119.35	39.1965	9.31943	18.4767	1556.42	20.7286	-29.7118	50.4404	11.1593	-18.2475
5886	-7.0901e+06	7.35201e+06	0.218923	-0.043854	0.0411205	0.184526	-5.98726	12.148	-23.7571	278.142	45.6601	10.2733	52.8263	123.108	33.0436	114.415	37.3897	9.20557	18.9417	1482.56	19.3501	-29.3036	48.6537	10.2285	-18.3995
5887	-6.9901e+06	7.35201e+06	0.218923	-0.043854	0.0411205	0.184526	-6.24074	11.7396	-23.9318	274.518	46.2906	10.0099	52.3901	121.245	32.8447	112.074	38.4909	9.16805	18.9034	1469.66	18.8643	-29.6903	48.5546	9.89783	-17.8723
5888	-6.8901e+06	7.35201e+06	0.212677	-0.059347	0.0490661	0.163033	-6.51126	12.0412	-24.8894	264.494	45.4704	9.12336	52.2624	115.87	31.413	105.447	39.449	9.03737	18.1088	1517.14	19.0674	-30.9501	50.0176	10.1895	-17.7945
5889	-6.7901e+06	7.35201e+06	0.19547	-0.0492615	0.0497878	0.180231	-7.42982	11.9557	-26.4411	261.392	45.4235	8.52005	51.708	113.359	31.4775	103.1	41.2067	8.79154	17.0902	1574.81	18.8897	-32.6265	51.5163	10.0077	-19.1469
5890	-6.6901e+06	7.35201e+06	0.19547	-0.0492615	0.0497878	0.180231	-8.64562	11.1177	-27.3786	265.022	44.9901	8.92367	49.6189	113.063	33.6059	104.045	42.5271	8.2608	16.1163	1583.98	17.9044	-33.3352	51.2396	9.28368	-20.7702
5891	-6.5901e+06	7.35201e+06	0.225589	-0.0504658	0.0486436	0.175258	-9.40863	10.3131	-27.5621	258.071	43.6219	8.92631	50.2238	110.784	32.0155	103.409	39.6064	7.59729	15.1965	1566.18	16.897	-33.0533	49.9503	8.67555	-22.0186
5892	-6.4901e+06	7.35201e+06	0.197669	-0.0266586	0.0390945	0.188352	-9.8206	9.82151	-27.5256	251.492	43.4662	8.68277	53.5913	111.128	29.5034	104.123	33.0291	7.06314	14.4165	1551.56	16.3486	-32.6011	48.9497	8.37272	-24.311
5893	-6.3901e+06	7.35201e+06	0.202307	-0.0575697	0.0213211	0.167331	-10.3364	9.49063	-27.9561	250.329	43.9329	7.92359	57.7364	114.799	26.4351	105.812	26.955	7.11763	14.4425	1558.72	16.2505	-32.9822	49.2327	8.1016	-27.2985
5894	-6.2901e+06	7.35201e+06	0.232411	-0.0976076	0.0528129	0.188134	-10.6814	9.65738	-28.7228	244.582	42.9794	7.3756	58.9471	113.1	24.2685	104.093	24.277	7.61099	14.9791	1594.4	16.7722	-33.9637	50.7359	8.14904	-28.6671
5895	-6.1901e+06	7.35201e+06	0.161925	-0.0894912	0.0565634	0.182835	-10.8219	9.8756	-29.2278	234.616	41.1869	6.94724	58.9	108.509	22.7536	100.154	22.7536	8.17289	15.6567	1618.62	17.4859	-34.6682	52.1541	8.24986	-29.2016
5896	-6.0901e+06	7.35201e+06	0.161925	-0.0894912	0.0565634	0.182835	-10.9778	9.76718	-29.374	226.114	39.3022	6.36853	59.5749	105.464	21.3267	96.9247	21.3277	8.60311	16.277	1616.51	17.9829	-34.8428	52.8257	8.12783	-29.3348
5897	-5.9901e+06	7.35201e+06	0.161925	-0.0894912	0.0565634	0.182835	-11.1856	9.61004	-29.5745	216.496	37.6174	5.50722	62.2022	103.935	19.2672	94.2227	19.2673	8.74844	16.4473	1618.39	18.2782	-34.9066	53.1848	8.01966	-29.4726
5898	-5.8901e+06	7.35201e+06	0.161925	-0.0894912	0.0565634	0.182835	-11.4708	9.30754	-29.9496	211.565	37.0041	5.07302	65.2817	104.941	17.9242	93.5186	17.9266	8.60191	16.1702	1624.78	17.9481	-35.2461	53.1942	7.88943	-29.7101
5899	-5.7901e+06	7.35201e+06	0.161925	-0.0894912	0.0565634	0.182835	-11.8913	8.74224	-30.4965	215.586	37.6324	5.0818	67.3192	109.249	17.6407	95.5898	17.6522	8.33807	15.7765	1627.74	17.0212	-35.8298	52.851	7.5842	-30.1845
5900	-5.6901e+06	7.35201e+06	0.136655	-0.0777478	0.0635304	0.194704	-12.2728	8.26762	-31.0261	225.586	39.9193	5.55388	67.29	114.592	19.0633	99.3285	19.0957	8.05355	15.3189	1632.78	16.2639	-36.3095	52.5734	7.33426	-30.7193
5901	-5.5901e+06	7.35201e+06	0.136655	-0.0777478	0.0635304	0.194704	-12.5283	8.09018	-31.4201	238.998	43.0587	6.27441	65.637	119.548	21.5923	104.234	21.7384	7.75049	14.7709	1641.89	15.8467	-36.6287	52.4754	7.22096	-31.1612
5902	-5.4901e+06	7.35201e+06	0.136655	-0.0777478	0.0635304	0.194704	-12.6096	8.24222	-31.5195	249.191	46.1112	6.77565	63.7949	122.742	23.8917	107.9	24.2023	7.51621	14.1978	1650.19	16.1683	-36.7703	52.9385	7.29198	-31.3199
5903	-5.3901e+06	7.35201e+06	0.136655	-0.0777478	0.0635304	0.194704	-12.6761	8.15403	-31.2963	256.359	48.622	6.90657	63.3969	125.596	24.8239	112.404	25.296	7.31465	13.8884	1637.39	16.1727	-36.492	52.6647	7.14116	-31.1705
5904	-5.2901e+06	7.35201e+06	0.136655	-0.0777478	0.0635304	0.194704	-12.5715	7.72507	-30.6098	264.099	50.4828	7.07818	63.2769	128.871	25.3144	116.337	25.4163	7.06559	13.8189	1590.3	15.6326	-35.4998	51.1324	6.76237	-30.5848
5905	-5.1901e+06	7.35201e+06	0.136655	-0.0777478	0.0635304	0.194704	-12.2783	7.09185	-29.7161	273.606	51.1765	7.91903	59.69	128.949	27.5866	116.066	27.5891	6.73699	13.6919	1523.35	14.8947	-34.3192	49.2138	6.37323	-29.7157
5906	-5.0901e+06	7.35201e+06	0.157035	-0.0907781	0.0687332	0.186268	-11.5575	6.9122	-28.7958	272.828	48.0815	9.20166	52.5398	119.634	31.3081	108.961	31.3187	6.69507	14.0799	1478.14	14.1113	-33.4575	47.5687	5.54038	-28.7753
5907	-4.9901e+06	7.35201e+06	0.14791	-0.0806328	0.0916902	0.202902	-11.798	6.42741	-29.0603	268.042	44.5695	9.86584	48.9195	113.681	33.1357	100.734	33.4031	7.10928	14.8828	1475.24	13.6498	-34.1155	47.7653	3.20516	-28.8022
5963	609904	7.35201e+06	0.0409525	-0.017986	0.041474	0.241792	NA	NA	NA	NA	NA	NA	NA	NA	NA	NA	NA	NA	NA	NA	NA	NA	NA	NA	NA
5964	709904	7.35201e+06	0.0679524	-0.023884	0.00819151	0.196551	3.93958	12.06	-3.02487	1472.45	172.569	74.1153	25.7796	473.603	252.981	316.561	408.112	5.17624	23.2033	621.49	16.3539	-5.88883	22.2427	4.31658	6.1115
5965	809904	7.35201e+06	0.0844618	-0.0341601	0.0131873	0.189482	0.349017	9.9644	-8.04864	1027.55	117.874	48.6258	25.5793	322.771	170.789	259.053	279.598	6.7593	24.449	735.461	15.4843	-12.0691	27.5534	3.82836	0.261622
5966	909904	7.35201e+06	0.0774987	-0.0395717	0.0236327	0.206035	-0.307575	10.5288	-10.2084	742.603	100.725	35.5815	31.4928	256.75	119.602	252.029	168.059	8.35638	26.0166	841.655	16.8384	-15.2748	32.1132	9.64402	-3.72121
5967	1.0099e+06	7.35201e+06	0.0324016	-0.0463558	0.0237239	0.188382	0.0996432	11.8014	-10.9316	621.836	97.3822	29.9435	38.6094	240.296	95.3903	240.261	113.712	8.70673	25.2846	918.177	18.1946	-16.2418	34.4364	11.7696	-5.95801
5968	1.1099e+06	7.35201e+06	0.0127492	-0.0627215	0.0180037	0.173055	0.749488	12.5661	-10.2116	587.081	87.4143	28.0013	37.0188	221.527	89.2176	220.785	106.537	8.57717	25.1093	919.963	19.0259	-15.1281	34.1541	11.996	-5.43037
5969	1.2099e+06	7.35201e+06	0.0311218	-0.0696228	0.0160032	0.167496	1.69943	13.384	-8.96724	582.542	77.336	29.0322	31.7617	205.894	93.9036	199.161	112.095	8.53893	25.2767	903.851	19.815	-13.8922	33.7072	11.4463	-4.63559
5970	1.3099e+06	7.35201e+06	0.0311218	-0.0696228	0.0160032	0.167496	NA	NA	NA	NA	NA	NA	NA	NA	NA	NA	NA	NA	NA	NA	NA	NA	NA	NA	NA
5971	1.4099e+06	7.35201e+06	0.029104	-0.0538293	-0.00725813	0.153825	NA	NA	NA	NA	NA	NA	NA	NA	NA	NA	NA	NA	NA	NA	NA	NA	NA	NA	NA
5972	1.5099e+06	7.35201e+06	0.00612206	-0.0629216	-0.0121421	0.137175	1.48943	13.7235	-9.89455	561.585	72.0269	26.8828	31.3904	197.853	87.3956	196.422	110.647	8.26381	23.453	950.009	20.3618	-14.8748	35.2366	13.1842	-5.29367
5973	1.6099e+06	7.35201e+06	0.00590891	-0.053189	-0.00700328	0.144971	0.993136	13.436	-10.5768	618.26	78.2738	30.8544	30.8704	216.986	97.2622	215.895	118.563	8.15281	22.9221	965.484	20.1684	-15.3868	35.5552	12.6545	-5.71406
5974	1.7099e+06	7.35201e+06	0.0378454	-0.0687277	0.00594942	0.152124	0.486274	13.1209	-11.4468	593.892	76.6838	29.9761	32.2404	212.63	93.8876	211.004	107.678	8.3591	22.8241	987.148	20.0233	-16.5875	36.6108	12.0129	-6.28948
5975	1.8099e+06	7.35201e+06	0.0535573	-0.0669689	0.00558034	0.157941	0.509978	13.2997	-11.6704	555.6	72.7935	26.1836	35.0456	204.131	83.5355	202.229	94.8487	8.26289	22.3271	1001.84	20.1225	-16.8697	36.9922	11.7214	-6.78011
5976	1.9099e+06	7.35201e+06	0.0622783	-0.0625217	-0.00345759	0.149594	0.775431	13.3889	-11.1947	527.733	70.8501	22.6877	36.5872	193.051	75.8096	191.503	84.6223	7.51069	21.1398	986.41	19.5754	-15.9346	35.51	12.104	-8.4444
5977	2.0099e+06	7.35201e+06	0.0514637	-0.0465473	-0.00966558	0.159867	1.16857	12.9513	-9.95635	496.131	67.4511	20.0341	38.1607	181.415	68.4727	180.313	76.2441	7.00199	21.1331	923.694	18.584	-14.5731	33.1571	12.3106	-8.35392
5978	2.1099e+06	7.35201e+06	0.0349745	-0.0259443	-0.000125378	0.186991	1.23247	11.9457	-8.96654	464.542	63.988	18.5509	40.7016	176.907	62.0419	164.761	70.6469	6.12065	20.1523	849.5	17.1451	-13.315	30.4601	8.32298	-6.38239
5979	2.2099e+06	7.35201e+06	0.0421609	-0.0434078	-0.00187022	0.187876	NA	NA	NA	NA	NA	NA	NA	NA	NA	NA	NA	NA	NA	NA	NA	NA	NA	NA	NA
5980	2.3099e+06	7.35201e+06	0.0694981	-0.0388543	-0.0205296	0.165864	NA	NA	NA	NA	NA	NA	NA	NA	NA	NA	NA	NA	NA	NA	NA	NA	NA	NA	NA
5981	2.4099e+06	7.35201e+06	0.0815358	-0.0480922	-0.0322615	0.143024	-0.0303392	12.4612	-12.3856	501.665	62.9369	21.9511	34.8843	177.172	73.0103	174.468	82.43	7.98102	21.5291	997.033	19.2717	-17.786	37.0577	9.871	-10.7637
5982	2.5099e+06	7.35201e+06	0.08228	-0.0452583	-0.0202412	0.148324	-0.13929	12.7299	-12.9173	528.909	69.2722	23.1009	35.3328	189.273	77.0468	187.65	89.4828	8.22198	21.3074	1027.56	19.8701	-18.7243	38.5944	11.8865	-10.2363
5983	2.6099e+06	7.35201e+06	0.08228	-0.0452583	-0.0202412	0.148324	-0.4641	12.9409	-13.7316	538.774	69.9314	23.7399	35.2099	192.842	78.1139	189.455	93.8838	8.27815	20.9584	1068.44	20.289	-19.2048	39.4938	11.52	-8.70799
5984	2.7099e+06	7.35201e+06	0.0682774	-0.0393604	-0.0260549	0.153778	-0.927983	12.8271	-14.5606	550.593	68.4433	25.2602	33.2289	192.516	82.9939	189.164	97.6998	8.73559	21.3986	1096.32	20.5301	-20.2757	40.8058	10.1333	-11.0544
5985	2.8099e+06	7.35201e+06	0.0773323	-0.0411967	-0.0236222	0.163648	-1.59127	12.2933	-15.5911	577.59	69.9449	27.8689	30.8313	197.454	90.7608	194.153	105.306	9.55138	22.0533	1113.62	20.7232	-22.5556	43.2788	10.1103	-11.4103
5986	2.9099e+06	7.35201e+06	0.0773323	-0.0411967	-0.0236222	0.163648	-2.11531	11.891	-16.5691	580.298	70.4987	28.44	30.3538	199.177	92.108	195.618	107.091	9.41381	21.4527	1136.27	20.3615	-23.4614	43.8229	10.3682	-9.93419
5987	3.0099e+06	7.35201e+06	0.0409744	-0.0465629	-0.0205	0.152146	-1.90226	12.3912	-16.3266	567.855	71.1544	27.0527	31.0163	195.636	88.4225	194.14	105.9	8.16911	19.543	1147.94	20.0085	-21.779	41.7875	11.3504	-9.03721
5988	3.1099e+06	7.35201e+06	0.0409744	-0.0465629	-0.0205	0.152146	-1.7357	12.869	-16.3029	564.388	70.117	26.9327	30.1715	191.986	88.3985	188.432	109.174	8.05699	19.3083	1166.37	20.2369	-21.4821	41.719	10.302	-8.91712
5989	3.2099e+06	7.35201e+06	0.0409744	-0.0465629	-0.0205	0.152146	-1.95584	12.9363	-16.6585	572.276	69.2296	27.6749	29.2967	193.447	90.2379	186.531	113.621	8.18295	19.1891	1182.35	20.5342	-22.1013	42.6355	8.68016	-9.07734
5990	3.3099e+06	7.35201e+06	0.0539986	-0.0418587	-0.0121675	0.163047	-2.45079	12.6928	-17.2058	580.819	70.6692	27.2526	30.0731	198.795	89.9377	192.073	113.591	8.72994	19.8129	1195.7	20.8723	-23.1855	44.0578	10.5184	-9.64387
5991	3.4099e+06	7.35201e+06	0.0665483	-0.048886	-0.00789536	0.158835	-3.46333	11.5668	-17.6872	598.555	75.1466	27.0489	32.4105	211.776	90.8309	205.79	107.401	8.9775	20.426	1176.33	20.2638	-23.6795	43.9433	10.0409	-12.6619
5992	3.5099e+06	7.35201e+06	0.0685136	-0.0513818	0.00787902	0.182738	-5.12239	10.0401	-18.7891	619.16	80.9295	27.6592	34.7553	225.375	92.113	222.763	99.6987	8.87602	20.4718	1165.86	18.5829	-24.753	43.3359	8.85965	-16.4952
5993	3.6099e+06	7.35201e+06	0.0921598	-0.0529311	0.0074323	0.193554	-4.5512	11.739	-20.2469	547.507	75.1963	24.2692	37.6243	206.598	79.6756	203.592	86.1911	9.74443	20.711	1284.36	20.0768	-26.9622	47.0391	10.2562	-17.5872
5994	3.7099e+06	7.35201e+06	0.059098	-0.0411124	-0.00726414	0.186276	-4.28598	12.6033	-21.0326	512.19	73.5551	21.4161	41.7936	201.671	70.4009	199.13	75.7612	9.66578	20.0221	1346.27	20.5353	-27.7206	48.2559	11.324	-18.2449
5995	3.8099e+06	7.35201e+06	0.0737487	-0.0480786	-0.00668493	0.162637	-4.46163	12.8448	-21.4468	493.196	72.4085	19.7729	44.0955	197.14	65.3402	196.558	70.5327	9.07891	18.8671	1376.15	20.6084	-27.5078	48.1162	12.3455	-18.9591
5996	3.9099e+06	7.35201e+06	0.0433775	-0.0411797	0.0116882	0.173341	-4.62609	12.7765	-21.3557	485.531	71.7113	19.2	43.7721	192.448	64.1562	192.186	71.3198	9.35381	19.2964	1376.35	21.0704	-27.4014	48.4718	12.5679	-19.0991
5997	4.0099e+06	7.35201e+06	0.0667812	-0.0573014	0.0041539	0.156324	-4.97059	12.657	-21.7204	482.046	70.6014	19.3796	42.7369	188.557	64.6191	187.525	72.484	9.53104	19.3973	1388.5	21.2838	-27.8556	49.1394	11.916	-19.4478
5998	4.1099e+06	7.35201e+06	0.0529844	-0.0498519	-0.00014382	0.160874	-5.43973	12.4437	-22.1705	482.757	69.6385	19.5497	42.08	186.697	65.4471	185.416	73.348	9.13793	18.6243	1400.56	20.9873	-28.0715	49.0588	11.5818	-19.3165
5999	4.2099e+06	7.35201e+06	0.0712277	-0.0474254	-0.00121935	0.165856	-5.73679	12.3839	-22.5012	483.856	69.6355	19.4001	42.3001	187.138	64.9396	185.443	73.6032	8.66804	17.7821	1414.21	20.5822	-28.1606	48.7428	11.7058	-18.3959
6000	4.3099e+06	7.35201e+06	0.0685747	-0.0423952	0.003692	0.185736	-5.94522	12.5203	-22.9679	480.659	70.6246	19.6587	42.1587	187.106	65.3991	184.484	74.0979	8.40031	17.205	1438.17	20.4172	-28.4093	48.8265	11.5568	-18.3827
6001	4.4099e+06	7.35201e+06	0.0692101	-0.0579885	-0.00350976	0.174363	-6.10975	12.6721	-23.3973	484.566	71.9698	20.6437	40.8884	186.864	67.9493	183.869	77.4913	8.43769	17.0499	1461.58	20.6018	-28.8873	49.489	11.4426	-18.0139
6002	4.5099e+06	7.35201e+06	0.0945461	-0.0611163	-0.00155847	0.168892	-6.25813	12.8146	-23.7742	496.52	72.3439	21.8618	39.0511	187.827	71.4622	185.071	82.1315	8.81584	17.3947	1482.94	21.0838	-29.5901	50.6739	11.4075	-18.6993
6003	4.6099e+06	7.35201e+06	0.0787288	-0.0446931	-0.00379737	0.192535	-6.41895	12.8737	-24.0867	503.792	70.9474	22.4305	37.7008	187.567	73.6677	185.831	84.2704	9.1979	17.8229	1499.49	21.4603	-30.1481	51.6084	11.5347	-19.7579
6004	4.7099e+06	7.35201e+06	0.0735983	-0.0369253	-0.0166777	0.184436	-6.41891	13.0089	-24.3473	506.484	68.7443	22.3491	36.775	185.579	74.1871	183.795	85.6738	9.3559	17.9502	1514.7	21.6338	-30.4853	52.1191	11.0756	-20.5827
6005	4.8099e+06	7.35201e+06	0.0807852	-0.0498677	-0.00533005	0.192171	-6.59945	12.9745	-24.8446	518.765	67.6454	22.829	35.5702	186.628	76.4039	181.416	89.1955	9.93626	18.7609	1532.56	21.8106	-31.1421	52.9527	7.85088	-22.211
6006	4.9099e+06	7.35201e+06	0.0750677	-0.0598541	-9.63856e-05	0.17894	-6.77037	12.9486	-25.2569	534.63	67.4826	23.6481	34.559	190.114	79.1113	180.398	94.6366	10.1593	18.9945	1548.71	21.9159	-31.568	53.4839	5.00401	-21.2251
6007	5.0099e+06	7.35201e+06	0.0750677	-0.0598541	-9.63856e-05	0.17894	-6.55364	13.2743	-25.1806	550.366	68.9377	24.1556	34.7025	196.89	80.2294	182.234	99.4492	9.80245	18.3018	1558.12	22.2186	-31.3316	53.5502	4.01477	-18.4829
6008	5.1099e+06	7.35201e+06	0.0908435	-0.0722498	-0.000516892	0.154991	-6.8306	13.0249	-25.5088	567.595	71.1536	24.2797	35.1874	203.429	80.5436	189.97	101.952	9.71624	18.1159	1562.2	22.2047	-31.4298	53.6345	5.04441	-17.0289
6009	5.2099e+06	7.35201e+06	0.0633085	-0.0642833	-0.00509757	0.166126	-8.01581	12.0142	-27.0222	577.928	73.0889	24.3511	35.777	207.959	81.0699	202.723	101.956	10.0327	18.4403	1583.45	21.6651	-32.7401	54.4052	8.47271	-18.3398
6010	5.3099e+06	7.35201e+06	0.0737328	-0.0646875	0.00991878	0.187893	-8.99208	11.4947	-28.8073	557.477	73.6198	22.7652	38.3395	208.974	75.6699	208.124	96.1046	10.6583	18.8736	1635.78	21.5161	-34.9557	56.4718	10.8373	-19.2919
6011	5.4099e+06	7.35201e+06	0.0957249	-0.0624662	0.00907367	0.194753	-9.42521	11.5466	-30.1107	517.072	72.5911	19.3558	41.9053	203.916	66.035	203.88	86.8059	11.1579	19.0835	1692.27	21.6055	-36.8756	58.4811	11.5104	-20.2401
6012	5.5099e+06	7.35201e+06	0.0633436	-0.0567095	0.0137	0.19478	-9.92609	11.417	-31.2334	486.606	72.0567	17.0223	43.9537	195.974	59.8961	195.974	78.3389	11.2318	18.8708	1733.87	21.3458	-38.1826	59.5283	11.417	-23.4719
6013	5.6099e+06	7.35201e+06	0.0793952	-0.0653279	0.0182918	0.188052	-10.5962	11.0941	-32.439	460.791	71.9519	15.5439	46.2323	188.924	54.8294	188.924	69.3099	11.2688	18.6797	1770.17	21.0456	-39.2756	60.3212	11.0941	-27.841
6014	5.7099e+06	7.35201e+06	0.0793952	-0.0653279	0.0182918	0.188052	-11.1168	11.0616	-33.6376	423.644	69.4811	13.4577	50.4129	180.984	47.2296	180.984	58.6428	11.6807	18.9011	1818.84	21.1544	-40.6313	61.7857	11.0616	-29.9293
6015	5.8099e+06	7.35201e+06	0.0793952	-0.0653279	0.0182918	0.188052	-11.1564	11.4634	-34.1044	384.611	66.2347	10.9953	55.6807	173.037	38.9497	173.037	48.2758	11.8423	18.8374	1854.48	21.4792	-41.3954	62.8746	11.4634	-30.2944
6016	5.9099e+06	7.35201e+06	0.140696	-0.0692226	0.0223651	0.197538	-11.0503	11.8646	-34.2027	353.858	64.309	8.97402	60.352	166.03	32.4852	166.03	39.6918	11.9431	18.7693	1875.28	21.7892	-41.8416	63.6309	11.8646	-30.2116
6017	6.0099e+06	7.35201e+06	0.140696	-0.0692226	0.0223651	0.197538	-11.4094	11.6313	-34.4652	343.127	64.7623	8.07178	62.7732	164.63	29.8139	164.63	35.3054	12.2635	19.1783	1878.16	21.6995	-42.246	63.9455	11.6313	-30.5243
6018	6.1099e+06	7.35201e+06	0.140696	-0.0692226	0.0223651	0.197538	-11.4507	11.704	-34.5447	340.458	63.6261	7.95076	61.9499	162.176	29.5328	162.176	34.083	12.3375	19.2495	1886.51	21.7808	-42.3101	64.0909	11.704	-30.6722
6019	6.2099e+06	7.35201e+06	0.126529	-0.0604074	0.0177517	0.204942	-11.3493	11.8323	-34.4371	343.405	60.9825	8.3745	59.1478	159.575	30.9226	159.575	35.1607	12.0888	18.9392	1889.42	21.734	-42.0826	63.8166	11.8323	-30.5994
6020	6.3099e+06	7.35201e+06	0.126529	-0.0604074	0.0177517	0.204942	-11.167	12.068	-34.2981	344.615	58.1705	8.74403	57.2096	157.423	31.9694	157.423	35.9286	11.6258	18.3255	1894.97	21.7465	-41.6675	63.4139	12.068	-30.4163
6021	6.4099e+06	7.35201e+06	0.126529	-0.0604074	0.0177517	0.204942	-11.1483	12.2205	-34.324	339.254	56.4903	8.54593	58.0812	156.947	31.0949	156.947	35.4248	11.2843	17.8827	1904.14	21.774	-41.3077	63.0817	12.2205	-30.4203
6022	6.5099e+06	7.35201e+06	0.126529	-0.0604074	0.0177517	0.204942	-11.4468	12.2706	-35.0278	325.363	55.4992	7.94141	59.9921	153.842	29.1906	153.842	33.6347	11.6927	18.2667	1938.07	22.0096	-41.9224	63.932	12.2706	-31.0513
6023	6.6099e+06	7.35201e+06	0.111131	-0.0508257	0.0127372	0.21299	-11.8744	12.3341	-36.2281	304.29	52.6281	7.47595	59.8115	143.977	27.5558	143.977	31.9382	12.6416	19.1815	1994.04	22.4185	-43.4141	65.8326	12.3341	-32.1003
6024	6.7099e+06	7.35201e+06	0.111131	-0.0508257	0.0127372	0.21299	-11.952	12.6248	-37.0068	282.428	46.9722	7.29144	56.4822	128.622	26.566	128.622	31.0426	12.9845	19.315	2040.29	22.7487	-44.4778	67.2266	12.6248	-32.6439
6025	6.8099e+06	7.35201e+06	0.13178	-0.0569733	0.00602225	0.191478	-11.546	13.1587	-36.9522	265.462	42.6439	7.14927	53.7418	116.378	25.7875	116.378	30.4608	12.4552	18.5016	2059.93	22.96	-44.3474	67.3074	13.1587	-32.2531
6026	6.9099e+06	7.35201e+06	0.135196	-0.0606563	-0.00806891	0.184213	-11.0215	13.7037	-36.54	261.729	42.6388	7.11058	53.6871	113.957	25.4412	113.957	30.2851	11.5779	17.3766	2064.91	23.1521	-43.4443	66.5964	13.7037	-31.1676
6027	7.0099e+06	7.35201e+06	0.159647	-0.0582737	-0.00963353	0.190926	-10.686	14.1263	-36.2644	271.492	45.4314	7.02239	54.9783	118.862	25.4134	118.862	30.3069	10.8409	16.4523	2070.19	23.2441	-42.6396	65.8837	14.1263	-31.2384
6028	7.1099e+06	7.35201e+06	0.157107	-0.054338	0.00497957	0.198773	-10.6989	14.4303	-36.4722	280.178	46.8698	7.52997	56.3311	123.634	26.0342	123.634	30.5909	10.5776	16.0574	2092.22	23.199	-42.6589	65.8579	14.4303	-31.5403
6029	7.2099e+06	7.35201e+06	0.165371	-0.0827519	0.0054118	0.166569	-11.0132	14.2104	-36.631	291.604	47.2849	8.49048	57.0801	130.213	27.7833	130.213	31.8788	10.3453	15.8282	2093.61	22.5966	-42.7165	65.3131	14.2104	-31.7503
6030	7.3099e+06	7.35201e+06	0.175756	-0.0765394	-0.0117619	0.154367	-11.4655	13.4211	-36.2103	318.251	51.4928	9.16555	58.9628	146.412	29.404	146.412	33.0187	9.8513	15.5306	2047.43	21.4965	-41.9389	63.4355	13.4211	-31.5507
6031	7.4099e+06	7.35201e+06	0.175756	-0.0765394	-0.0117619	0.154367	-12.2969	11.9544	-35.4634	362.829	61.3617	9.4218	63.0161	174.333	30.5706	174.333	33.8512	9.59736	15.8179	1959.6	20.0357	-40.7874	60.8231	11.9544	-31.3788
6032	7.5099e+06	7.35201e+06	0.165267	-0.0710188	-0.0110203	0.158561	-13.1063	10.7791	-35.3309	388.181	68.1596	9.07417	66.8951	192.074	29.9735	192.074	32.8963	10.0013	16.7713	1908.65	19.2154	-40.4974	59.7128	10.7791	-31.8598
6033	7.6099e+06	7.35201e+06	0.138476	-0.0590532	-0.0118999	0.179586	-13.6184	10.6791	-36.4973	368.669	67.0421	7.91066	70.4672	188.027	26.2831	188.027	29.3178	10.7141	17.4966	1955.36	19.5712	-41.6928	61.2641	10.6791	-33.0724
6034	7.7099e+06	7.35201e+06	0.150697	-0.0669722	-0.00672181	0.17388	-14.6315	10.6298	-38.8152	332.103	63.3538	6.75605	74.8423	177.861	22.44	177.861	25.5377	11.302	17.6632	2053.85	19.9372	-44.0977	64.035	10.6298	-35.2833
6035	7.8099e+06	7.35201e+06	0.162341	-0.0721214	-0.00137425	0.167545	-15.4859	10.4295	-40.4998	304.7	61.5333	6.21528	79.5413	171.75	20.1662	171.75	22.6737	11.5944	17.6054	2120.45	19.9494	-45.9516	65.901	10.4295	-37.0138
6036	7.9099e+06	7.35201e+06	0.166024	-0.0699433	0.0126078	0.174099	-15.6175	10.1842	-40.2334	299.043	64.8968	5.8185	84.3789	175.351	18.7205	175.351	20.3854	11.5875	17.7359	2101.61	19.713	-45.6577	65.3707	10.1842	-37.1533
6037	8.0099e+06	7.35201e+06	0.166024	-0.0699433	0.0126078	0.174099	-15.4072	10.0264	-39.1611	302.343	69.8236	5.61804	87.9077	181.425	18.0932	181.425	19.2667	11.3814	17.8449	2048.86	19.4499	-44.3644	63.8143	10.0264	-36.3425
6038	8.1099e+06	7.35201e+06	0.13841	-0.0653909	0.0244341	0.197305	-15.321	10.1524	-38.957	293.715	69.7098	5.42471	88.9768	177.752	18.0709	177.752	19.3546	11.2406	17.7645	2044.03	19.3471	-43.9533	63.3004	10.1524	-35.6417
6039	8.2099e+06	7.35201e+06	0.124149	-0.056416	0.019907	0.204699	-15.4742	10.3145	-39.4598	278.012	66.1975	5.06923	88.24	168.495	18.3395	168.495	21.3106	11.2273	17.704	2074.08	19.2874	-44.1458	63.4331	10.3145	-34.9673
6040	8.3099e+06	7.35201e+06	0.136465	-0.0469668	0.0126622	0.194603	-15.6456	10.6314	-40.2874	267.994	62.4546	4.92773	85.1135	159.563	19.6706	159.563	25.0833	11.46	17.8022	2124.7	19.5445	-44.8739	64.4184	10.6314	-33.3378
6041	8.4099e+06	7.35201e+06	0.13841	-0.0653909	0.0244341	0.197305	-15.8997	10.1605	-40.011	273.269	62.5856	5.63441	81.9247	159.455	22.4627	159.455	29.3733	11.8405	18.516	2097.2	19.2373	-44.8288	64.0661	10.1587	-31.1136
6042	8.5099e+06	7.35201e+06	0.15195	-0.0721895	0.0221863	0.190814	-15.1545	10.1764	-38.2442	272.451	61.344	6.11958	78.9031	155.423	23.9128	155.339	32.8096	12.0641	19.2651	2023.03	19.2821	-43.4204	62.7025	10.0902	-27.4616
6043	8.6099e+06	7.35201e+06	0.156532	-0.0777628	0.0128569	0.182636	-13.6946	10.8201	-35.9322	272.021	58.0505	6.76044	73.0287	147.745	25.9039	147.096	36.4391	11.6255	19.1228	1949	19.6954	-41.1178	60.8132	10.2059	-23.3634
6044	8.7099e+06	7.35201e+06	0.144064	-0.0699541	0.00823272	0.188898	-12.15	12.2352	-34.7016	265.063	51.5375	6.93131	65.0771	133.469	26.8148	132.044	40.5114	10.89	18.0115	1950.55	20.8551	-39.6502	60.5053	10.8929	-18.3381
6045	8.8099e+06	7.35201e+06	0.181296	-0.068689	0.0160958	0.179701	-11.7482	12.8378	-34.8243	264.004	47.2836	7.17855	58.2853	124.09	28.1551	122.384	44.7821	10.5168	17.2426	1980.17	21.4902	-39.5411	61.0314	10.9642	-14.5701
6046	8.9099e+06	7.35201e+06	0.157818	-0.0705294	0.0166298	0.173869	-12.1297	12.568	-35.5361	260.561	45.8024	7.16787	55.6684	118.923	28.1952	117.677	46.4038	10.8587	17.5968	2001.26	21.4862	-40.2105	61.6966	10.5516	-13.5435
6047	9.0099e+06	7.35201e+06	0.145576	-0.0651305	0.011751	0.180673	-12.3642	12.2466	-35.864	251.908	45.5473	6.767	56.4364	115.391	26.6378	114.364	44.6999	11.3206	18.3055	2003.24	21.244	-40.6106	61.8546	10.5082	-13.5779
6048	9.1099e+06	7.35201e+06	0.160055	-0.0742555	-0.00265792	0.169285	-12.4844	11.6518	-35.3287	251.144	47.5611	6.70797	59.4047	117.913	25.7944	117.28	41.8533	11.4752	18.9047	1956.97	20.5653	-40.1419	60.7072	10.5511	-15.8631
6049	9.2099e+06	7.35201e+06	0.148604	-0.0668794	-0.0075059	0.174623	-12.489	10.9908	-34.3466	258.189	49.0149	7.25772	60.5362	122.399	26.7393	121.949	40.6613	11.3275	19.1572	1888.38	19.8034	-39.3333	59.1367	10.0346	-18.3238
6050	9.3099e+06	7.35201e+06	0.168457	-0.0836339	0.0111831	0.177133	-12.4468	10.3424	-33.0653	268.327	49.7173	8.08966	60.0087	126.649	28.7078	126.346	41.8687	11.1363	19.4433	1809.43	19.1098	-38.1819	57.2917	9.61764	-21.3789
6051	9.4099e+06	7.35201e+06	0.179488	-0.0882085	0.0159133	0.170685	-12.4152	9.78636	-31.7236	282.539	49.7817	9.17303	56.7263	129.584	31.8642	129.24	45.8932	11.0757	19.8833	1735.22	18.6541	-37.0661	55.7202	9.05737	-22.0224
6052	9.5099e+06	7.35201e+06	0.146496	-0.0826718	0.0123947	0.170567	-12.5631	9.34496	-30.8822	301.458	50.3524	10.7607	52.7074	133.578	36.0538	133.163	50.8972	11.0651	20.2182	1686.95	18.3372	-36.3984	54.7355	8.59859	-21.0727
6053	9.6099e+06	7.35201e+06	0.114086	-0.0625246	-0.00518251	0.174189	-12.3587	9.56056	-30.4149	314.598	50.8474	11.8384	49.7917	135.284	38.7855	134.787	55.4594	10.9929	20.2208	1678.53	18.5	-35.8876	54.3875	8.78676	-18.7452
6054	9.7099e+06	7.35201e+06	0.14858	-0.0629943	-0.000369373	0.172122	-11.6663	10.3994	-30.1185	322.645	51.5885	12.7687	46.896	134.367	40.7983	132.07	60.0429	10.7957	19.8346	1697.67	19.127	-35.348	54.4749	8.34243	-15.4049
6055	9.8099e+06	7.35201e+06	0.13628	-0.0549279	-0.00531215	0.177762	-10.9005	10.6178	-28.7099	343.467	55.1446	14.2522	45.2506	140.738	45.6363	137.045	65.1618	10.514	19.8748	1648.58	19.2023	-33.7574	52.9596	8.16996	-14.899
6056	9.9099e+06	7.35201e+06	0.11441	-0.0572598	-0.00401362	0.171999	-9.71327	11.1492	-26.9381	345.896	55.1133	15.1615	43.6164	139.249	48.4448	133.778	67.4449	10.4398	20.2673	1595.22	19.5315	-31.986	51.5175	8.81922	-13.8296
6057	1.00099e+07	7.35201e+06	0.108428	-0.0569618	-0.0122367	0.169636	-9.13525	10.9703	-25.4855	340.997	53.9969	15.2302	42.9069	136.46	49.3842	130.607	67.999	10.0976	20.23	1532.41	19.1515	-30.682	49.8335	8.89286	-13.9968
6058	1.01099e+07	7.35201e+06	0.111629	-0.0663117	-0.0152143	0.149789	-8.91265	10.4231	-24.4144	338.365	52.8646	15.2567	41.2031	133.044	50.1082	127.539	71.7863	9.33401	19.4591	1472.99	18.2077	-29.6119	47.8196	8.54965	-14.0917
6059	1.02099e+07	7.35201e+06	0.111629	-0.0663117	-0.0152143	0.149789	-8.57115	9.87633	-23.4306	348.487	52.5152	14.9943	38.1292	131.6	52.3717	124.747	80.5795	8.3886	18.4015	1412.91	16.9744	-28.4659	45.4404	8.38262	-13.7412
6060	1.03099e+07	7.35201e+06	0.0913587	-0.0963906	0.0299611	0.165894	-8.06242	9.17709	-22.1056	377.97	54.7042	15.3847	35.4708	137.255	56.4411	128.511	90.6533	7.48566	17.6209	1328.31	15.5628	-26.8425	42.4054	8.11039	-12.6499
6061	1.04099e+07	7.35201e+06	0.0913587	-0.0963906	0.0299611	0.165894	-7.35533	8.63644	-20.6286	413.513	58.8787	16.4997	34.3916	147.754	60.9084	136.275	95.1024	6.86012	17.338	1240.38	14.4912	-25.0656	39.5568	7.91862	-10.8692
6062	1.05099e+07	7.35201e+06	0.11603	-0.0953545	0.0299139	0.172394	NA	NA	NA	NA	NA	NA	NA	NA	NA	NA	NA	NA	NA	NA	NA	NA	NA	NA	NA
6215	-1.02901e+07	7.25201e+06	0.16923	-0.0784462	0.0467211	0.177295	NA	NA	NA	NA	NA	NA	NA	NA	NA	NA	NA	NA	NA	NA	NA	NA	NA	NA	NA
6216	-1.01901e+07	7.25201e+06	0.16923	-0.0784462	0.0467211	0.177295	NA	NA	NA	NA	NA	NA	NA	NA	NA	NA	NA	NA	NA	NA	NA	NA	NA	NA	NA
6220	-9.7901e+06	7.25201e+06	0.169585	-0.110392	0.0595691	0.158352	NA	NA	NA	NA	NA	NA	NA	NA	NA	NA	NA	NA	NA	NA	NA	NA	NA	NA	NA
6221	-9.6901e+06	7.25201e+06	0.190744	-0.0861516	0.0634516	0.157567	NA	NA	NA	NA	NA	NA	NA	NA	NA	NA	NA	NA	NA	NA	NA	NA	NA	NA	NA
6222	-9.5901e+06	7.25201e+06	0.160248	-0.0812628	0.0651897	0.172888	-2.83437	11.7525	-16.1442	395.104	83.2072	14.1333	65.5754	199.474	47.1083	171.31	58.9847	8.31789	21.4075	1161.85	17.9455	-21.0677	39.0132	10.2731	-8.27302
6223	-9.4901e+06	7.25201e+06	0.160248	-0.0812628	0.0651897	0.172888	-2.84481	12.4372	-16.9823	386.646	79.0824	14.5288	62.5449	190.957	48.2664	169.097	60.6761	8.63631	20.916	1222.72	18.9449	-22.3579	41.3028	10.6302	-6.96318
6224	-9.3901e+06	7.25201e+06	0.169308	-0.0725602	0.057643	0.165535	-2.86492	12.798	-17.4637	387.29	75.3545	15.5412	57.9766	183.486	51.3271	170.509	62.7851	8.91626	20.9094	1257.4	19.4068	-23.2308	42.6375	10.8521	-6.54398
6225	-9.2901e+06	7.25201e+06	0.169822	-0.0523125	0.0221876	0.15969	-2.96429	13.0924	-18.1309	385.96	76.0714	15.1884	59.5241	183.886	50.6538	178.186	61.0155	9.13737	20.8181	1296.53	19.7996	-24.0778	43.8773	11.4463	-7.18652
6226	-9.1901e+06	7.25201e+06	0.149742	-0.0607917	0.0210015	0.158105	-3.12734	13.1092	-18.5178	391.323	80.4729	14.9474	64.2186	192.248	49.8547	190.012	59.1469	9.73697	21.7252	1314.82	20.2481	-24.6162	44.8643	12.1019	-8.75228
6227	-9.0901e+06	7.25201e+06	0.158046	-0.053715	0.0156422	0.152052	-3.28949	12.9457	-18.5391	412.002	84.4642	15.6853	66.2658	203.815	51.8049	201.737	61.0653	10.3654	23.0021	1309.91	20.5917	-24.6338	45.2254	12.0911	-10.2263
6228	-8.9901e+06	7.25201e+06	0.158046	-0.053715	0.0156422	0.152052	-3.49989	12.5593	-18.3564	418.939	82.1018	15.2422	64.8954	205.91	51.264	204.646	60.9359	10.7393	24.0613	1286.2	20.4107	-24.4621	44.8728	11.8537	-10.3749
6229	-8.8901e+06	7.25201e+06	0.186473	-0.0573013	0.0137288	0.152408	-4.09127	11.5942	-18.3466	383.192	75.6914	12.3027	67.6413	196.156	43.7435	195.913	52.8289	10.6745	24.5535	1248.53	19.277	-24.4066	43.6836	11.4007	-11.63
6230	-8.7901e+06	7.25201e+06	0.194879	-0.0636866	0.017139	0.148621	-4.31178	11.1723	-18.3322	335.104	67.9969	9.25095	71.9261	179.75	35.4613	179.747	44.7473	10.5205	24.5364	1232.2	18.6858	-24.3755	43.0613	11.1672	-11.715
6231	-8.6901e+06	7.25201e+06	0.194879	-0.0636866	0.017139	0.148621	-3.41613	12.8279	-18.9278	294.552	60.648	6.43464	75.1559	161.828	26.5788	161.828	37.9568	11.2842	24.5106	1320.52	20.8133	-25.2833	46.0966	12.8279	-10.4919
6232	-8.5901e+06	7.25201e+06	0.186473	-0.0573013	0.0137288	0.152408	-4.24543	12.4144	-20.4008	266.75	59.713	5.23658	83.5597	156.454	21.0384	156.454	29.1214	11.5087	24.0617	1364.09	20.8182	-27.0279	47.8461	12.4144	-11.5432
6233	-8.4901e+06	7.25201e+06	0.194879	-0.0636866	0.017139	0.148621	-5.795	11.3912	-22.7468	262.229	61.8229	5.2023	87.2206	157.607	19.2525	157.607	25.5196	11.3836	23.1291	1412.22	19.8919	-29.3242	49.2161	11.3912	-13.6426
6234	-8.3901e+06	7.25201e+06	0.169954	-0.0351668	0.000343833	0.14339	-5.96696	11.5974	-23.6888	283.409	61.4039	6.39472	76.3617	155.583	22.954	155.583	33.4985	11.4858	22.762	1450.74	20.1743	-30.2597	50.434	11.5974	-14.0974
6235	-8.2901e+06	7.25201e+06	0.178597	-0.037821	0.00481601	0.138393	-5.45152	12.0159	-23.1633	318.672	58.7049	8.27094	59.5744	150.578	30.6021	150.577	49.913	12.0783	23.6026	1445.67	20.7164	-30.4546	51.1711	12.0145	-13.4635
6236	-8.1901e+06	7.25201e+06	0.196782	-0.0355321	0.00408738	0.141782	-5.75598	10.8189	-21.6609	355.288	62.176	10.7515	53.9595	160.394	39.3321	160.37	60.1843	11.9748	24.4943	1340.59	19.2391	-29.6808	48.9199	10.7902	-13.4402
6237	-8.0901e+06	7.25201e+06	0.18694	-0.0488314	0.0141228	0.149969	-5.82097	10.3794	-20.9661	357.894	63.1104	11.2883	53.3182	160.722	41.9167	160.687	59.3726	11.4673	24.2071	1295.4	18.4496	-28.9431	47.3927	10.331	-13.3611
6238	-7.9901e+06	7.25201e+06	0.193314	-0.0546893	0.0119535	0.145579	-5.87301	10.2603	-20.8067	354.574	62.6392	12.4616	52.1988	157.12	43.5651	157.119	56.8262	11.1364	23.9284	1284.59	18.1015	-28.446	46.5476	10.259	-13.3835
6239	-7.8901e+06	7.25201e+06	0.178175	-0.0497002	0.00744414	0.139464	-6.95776	9.05317	-21.2357	382.476	66.2944	15.0693	50.1887	166.767	51.9697	166.767	61.2482	10.9777	24.1947	1258.48	16.7846	-28.5871	45.3717	9.05317	-14.6886
6240	-7.7901e+06	7.25201e+06	0.178175	-0.0497002	0.00744414	0.139464	-8.11277	8.00359	-22.0768	430.258	71.7848	17.8583	47.9545	183.992	62.2103	183.992	70.2505	10.755	24.0362	1257.34	15.6702	-29.0744	44.7446	8.00359	-15.78
6241	-7.6901e+06	7.25201e+06	0.210073	-0.05626	0.0139777	0.127123	-8.14557	8.33339	-22.5319	447.383	73.4295	19.0293	47.4432	192.572	64.105	192.572	74.593	10.5101	23.3033	1292.38	15.9459	-29.1925	45.1385	8.33339	-16.4125
6242	-7.5901e+06	7.25201e+06	0.194375	-0.0578281	0.020952	0.135668	-7.36497	10.1086	-23.1238	423.184	69.4477	16.7211	49.8996	187.746	56.5463	187.746	69.6653	10.3573	21.9226	1386.42	17.7555	-29.5622	47.3177	10.1086	-16.0995
6243	-7.4901e+06	7.25201e+06	0.187212	-0.0513156	0.0236915	0.140304	-6.11075	12.5902	-23.8803	371.247	60.6166	13.6521	52.6059	167.399	45.4543	167.399	57.1562	10.2777	20.4639	1512.96	20.2684	-30.0319	50.3003	12.5898	-15.526
6244	-7.3901e+06	7.25201e+06	0.21056	-0.0384776	0.0219301	0.162001	-5.39162	13.7816	-24.1369	335.018	54.4754	12.2069	53.4912	150.071	39.3239	149.968	47.6709	10.1777	19.7446	1566.23	21.4969	-30.0563	51.5532	13.6332	-15.5181
6245	-7.2901e+06	7.25201e+06	0.213077	-0.0612011	0.0342931	0.165893	-5.30037	13.7012	-23.9612	323.496	52.2037	12.4706	51.788	141.315	39.5988	140.275	44.7167	10.2112	19.8644	1551.09	21.515	-29.8847	51.3998	12.9793	-16.0096
6246	-7.1901e+06	7.25201e+06	0.187475	-0.0624293	0.0409272	0.158935	-5.25764	13.6052	-23.8171	309.029	49.2114	11.9913	49.368	131.349	38.827	128.535	44.4765	10.1909	19.858	1537.69	21.4204	-29.8961	51.3164	11.8103	-16.5172
6247	-7.0901e+06	7.25201e+06	0.187475	-0.0624293	0.0409272	0.158935	-5.55532	13.3225	-24.1177	294.412	47.523	10.8527	48.3057	123.824	36.8458	119.144	45.646	10.1207	19.6395	1536.04	21.0043	-30.5258	51.53	11.0337	-16.1448
6248	-6.9901e+06	7.25201e+06	0.212996	-0.0602066	0.0413072	0.164417	-5.99727	13.4127	-25.2683	279.135	45.7215	9.60108	48.1409	116.656	34.591	110.473	45.8246	9.86434	18.6592	1583.72	20.7741	-32.107	52.8811	11.1568	-17.0486
6249	-6.8901e+06	7.25201e+06	0.201594	-0.056386	0.0443962	0.171213	-6.76107	12.9898	-26.4262	269.367	44.3909	8.39027	48.5856	111.942	32.4435	106.199	45.4896	9.11502	17.1701	1613.4	19.8945	-33.148	53.0425	10.9242	-18.3613
6250	-6.7901e+06	7.25201e+06	0.186417	-0.0619091	0.047934	0.155304	-7.66756	12.1041	-26.8337	268.625	43.9526	8.32142	48.4178	111.369	32.2115	106.706	45.2127	8.15128	15.7983	1598.14	18.6758	-32.8448	51.5206	10.2735	-19.5078
6251	-6.6901e+06	7.25201e+06	0.167942	-0.044427	0.0484964	0.168431	-8.34558	11.2728	-26.6635	273.508	44.7759	9.69617	47.6677	113.661	34.6073	110.005	43.2144	7.48614	15.0009	1564.93	17.8006	-32.0622	49.8627	9.64097	-21.1758
6252	-6.5901e+06	7.25201e+06	0.18995	-0.0593571	0.0480749	0.142764	-8.75117	10.9857	-26.7925	275.663	46.4186	9.81817	50.7472	118.587	33.3326	112.926	36.4017	7.42141	14.9045	1563.9	17.7162	-31.9945	49.7107	9.3707	-24.6331
6253	-6.4901e+06	7.25201e+06	0.206267	-0.0470835	0.0451191	0.153603	-9.22876	10.6926	-27.4545	276.38	47.1923	9.20681	54.0221	122.147	30.3696	114.317	30.7821	7.85445	15.491	1580.95	17.7211	-32.8557	50.5768	9.17376	-27.147
6254	-6.3901e+06	7.25201e+06	0.232088	-0.0733076	0.0348084	0.148578	-9.66022	10.6021	-28.2502	269.796	45.5499	8.55405	55.3672	120.736	28.2076	112.538	28.217	8.42421	16.1901	1605.99	17.9974	-33.9709	51.9683	9.04692	-28.2268
6255	-6.2901e+06	7.25201e+06	0.209478	-0.0807131	0.0479458	0.165253	-9.92626	10.6421	-28.6286	261.417	43.7953	7.68912	56.5769	118.597	26.2502	109.95	26.2502	8.88857	16.7461	1616.32	18.6275	-34.4271	53.0546	8.93645	-28.6229
6256	-6.1901e+06	7.25201e+06	0.202947	-0.101775	0.0577308	0.159171	-10.17	10.2655	-28.6403	251.431	42.0184	6.54951	59.0382	116.655	23.7925	107.11	23.7999	9.06437	17.0695	1599.87	18.7893	-34.3124	53.1016	8.64836	-28.4908
6257	-6.0901e+06	7.25201e+06	0.202947	-0.101775	0.0577308	0.159171	-10.4694	9.91678	-28.9303	242.697	41.0513	5.51811	62.0276	115.989	21.3818	104.281	21.4025	8.9557	16.8791	1600.78	18.592	-34.467	53.059	8.47882	-28.6925
6258	-5.9901e+06	7.25201e+06	0.202947	-0.101775	0.0577308	0.159171	-10.7961	9.60293	-29.3883	241.462	41.2929	5.22497	64.5986	118.751	20.4653	103.975	20.5225	8.69616	16.4065	1609.95	18.1519	-34.8469	52.9989	8.35652	-29.0251
6259	-5.8901e+06	7.25201e+06	0.202947	-0.101775	0.0577308	0.159171	-11.18	8.93956	-29.8367	247.164	42.1956	5.67384	65.9051	123.568	21.2296	106.137	21.377	8.34094	15.9554	1606.97	17.0166	-35.258	52.2746	8.0369	-29.3274
6260	-5.7901e+06	7.25201e+06	0.202947	-0.101775	0.0577308	0.159171	-11.5003	8.62651	-30.2796	261.175	44.8633	6.60118	65.0538	129.862	23.7175	110.727	24.0677	8.06068	15.4552	1614.84	16.534	-35.6279	52.1618	7.85398	-29.7863
6261	-5.6901e+06	7.25201e+06	0.183781	-0.0924166	0.0638468	0.167881	-11.5078	8.5642	-30.3192	269.273	47.8018	7.36021	63.1238	132.016	26.3344	113.008	27.0775	7.68639	14.8225	1616.34	16.1971	-35.657	51.8541	7.90441	-29.9308
6262	-5.5901e+06	7.25201e+06	0.136655	-0.0777478	0.0635304	0.194704	-11.4037	8.76506	-30.169	273.105	50.033	7.65555	60.7285	130.997	28.0654	113.911	29.1001	7.37815	14.2524	1618.01	16.2857	-35.5615	51.8472	8.04314	-29.8962
6263	-5.4901e+06	7.25201e+06	0.136655	-0.0777478	0.0635304	0.194704	-11.4327	8.70295	-29.9347	267.698	50.4207	7.1085	62.1392	129.866	26.1414	113.801	27.6538	7.2399	14.3989	1605.64	16.4153	-35.2565	51.6718	7.91517	-29.7425
6264	-5.3901e+06	7.25201e+06	0.136655	-0.0777478	0.0635304	0.194704	-11.398	8.44979	-29.491	259.298	49.4882	6.4636	64.0545	127.339	23.5759	114.412	25.0394	7.09005	14.0332	1579.37	16.0685	-34.5559	50.6243	7.69267	-29.4206
6265	-5.2901e+06	7.25201e+06	0.157035	-0.0907781	0.0687332	0.186268	-11.2354	7.98584	-28.9006	265.072	49.3089	7.26402	60.6494	125.499	25.7587	115.07	25.7993	6.93659	14.163	1532.61	15.3441	-33.6713	49.0154	7.25508	-28.9001
6266	-5.1901e+06	7.25201e+06	0.157035	-0.0907781	0.0687332	0.186268	NA	NA	NA	NA	NA	NA	NA	NA	NA	NA	NA	NA	NA	NA	NA	NA	NA	NA	NA
6323	509904	7.25201e+06	3.75013e-05	-0.0429811	0.0331023	0.186003	NA	NA	NA	NA	NA	NA	NA	NA	NA	NA	NA	NA	NA	NA	NA	NA	NA	NA	NA
6324	609904	7.25201e+06	-0.00461667	-0.0406119	0.0230689	0.165945	4.92159	12.2074	-1.53768	1306.54	150.564	65.7841	26.1672	418.62	223.887	286.571	372.465	5.31554	25.9667	569.236	16.2405	-4.18433	20.4248	5.47228	6.49893
6325	709904	7.25201e+06	0.0727669	-0.0560583	0.0164932	0.164006	3.23918	11.9698	-4.36039	1165.3	133.345	60.4505	24.241	367.027	203.662	282.03	316.463	6.23653	25.2831	670.786	16.9789	-7.60424	24.5832	6.25419	3.50606
6326	809904	7.25201e+06	0.0778565	-0.0456117	0.0112155	0.171837	1.10312	10.7234	-7.40993	827.021	101.066	41.7582	27.7884	270.735	140.851	242.604	193.714	7.3165	26.0289	738.465	16.4156	-11.6751	28.0906	7.49623	-0.544295
6327	909904	7.25201e+06	0.0527426	-0.0436241	0.0228959	0.192962	1.27598	11.7687	-8.3763	670.264	94.1609	33.5915	33.3005	240.779	107.296	238.638	135.798	8.25059	26.501	814.581	18.0415	-13.0747	31.1162	11.3712	-3.19533
6328	1.0099e+06	7.25201e+06	0.00173428	-0.051093	0.0185895	0.160578	1.27308	12.5144	-9.40618	632.408	93.9023	30.3656	36.1609	237.823	97.7765	237.514	117.86	8.74939	26.1604	884.37	19.1168	-14.3205	33.4372	12.4224	-4.74641
6329	1.1099e+06	7.25201e+06	-0.0307957	-0.0559784	0.0190017	0.148897	1.80451	12.9539	-8.48945	632.103	89.0468	30.3501	34.4046	229.704	99.6146	223.492	120.49	8.35749	25.8338	867.7	19.3631	-12.97	32.3331	11.6423	-3.91107
6330	1.2099e+06	7.25201e+06	-0.0318041	-0.0678208	0.0136964	0.139623	2.58933	13.5584	-7.36304	633.331	78.3565	32.8735	29.4097	215.417	105.851	200.481	128.311	7.5685	24.1473	848.135	19.4616	-11.7424	31.204	9.70579	-3.52013
6331	1.3099e+06	7.25201e+06	0.0524346	-0.0599157	0.00386489	0.153125	NA	NA	NA	NA	NA	NA	NA	NA	NA	NA	NA	NA	NA	NA	NA	NA	NA	NA	NA
6332	1.4099e+06	7.25201e+06	0.0406715	-0.0443056	0.00573521	0.154404	2.55749	13.8407	-8.02032	524.28	69.5964	24.4318	34.0109	190.466	78.7556	183.834	97.5254	7.41652	22.5183	885.489	19.9239	-12.9278	32.8516	12.5484	-4.35285
6333	1.5099e+06	7.25201e+06	-0.00207697	-0.0494505	0.00413383	0.149721	2.20715	13.9229	-8.77524	559.14	75.0508	26.4658	34.6102	205.71	84.731	204.845	102.524	8.22662	24.0924	914.17	20.7303	-13.4052	34.1355	13.3963	-4.36738
6334	1.6099e+06	7.25201e+06	-0.0142175	-0.0490368	-0.00832439	0.135255	2.01011	14.0891	-9.38868	608.166	80.7998	29.5141	33.9099	222.498	93.336	222.247	111.94	7.74009	22.5301	944.264	20.554	-13.7882	34.3422	13.9279	-4.68673
6335	1.7099e+06	7.25201e+06	-0.00128203	-0.0616457	-0.00476068	0.125179	1.57761	13.9216	-10.1512	634.61	82.1282	32.4593	31.6297	225.318	100.723	223.906	118.966	8.02421	22.6156	966.639	20.5303	-14.9371	35.4674	13.0926	-5.23293
6336	1.8099e+06	7.25201e+06	0.0247747	-0.0581257	-0.00598482	0.13417	1.19323	13.7658	-10.7397	612.729	78.3598	30.3157	32.9353	220.063	94.6572	218.192	111.59	8.15751	22.5075	983.921	20.5331	-15.7092	36.2423	12.4224	-6.00364
6337	1.9099e+06	7.25201e+06	0.0330491	-0.0574185	-0.00382029	0.146791	1.12174	13.8089	-10.9059	577.112	77.2398	25.3978	37.1982	213.445	83.0848	212.484	94.012	7.73635	21.5611	992.724	20.25	-15.6263	35.8763	12.596	-8.74439
6338	2.0099e+06	7.25201e+06	0.0353512	-0.0489584	-0.00883724	0.153822	1.35161	13.7593	-10.4587	554.375	76.9425	23.7165	38.329	205.348	78.662	204.877	86.878	7.4067	21.2155	973.661	19.8534	-15.0797	34.933	13.3099	-8.87122
6339	2.1099e+06	7.25201e+06	0.0218562	-0.0419333	-0.0131379	0.157882	1.35646	13.1933	-10.0947	562.589	76.2664	24.6021	37.5695	206.958	81.079	197.067	90.3818	7.25916	21.4329	938.048	19.3358	-14.5932	33.9289	9.43864	-8.07925
6340	2.2099e+06	7.25201e+06	0.0218562	-0.0419333	-0.0131379	0.157882	1.19016	13.1332	-10.5819	550.554	73.2892	23.854	37.1444	204.485	78.8205	186.013	91.3122	7.19595	20.7195	956.974	19.5144	-15.2163	34.7307	7.5659	-7.15407
6341	2.3099e+06	7.25201e+06	0.0549281	-0.0398138	-0.0246425	0.155379	1.06406	13.7222	-11.3431	547.466	72.1934	23.9818	35.4254	196.911	79.1911	187.648	93.0245	7.57117	20.3679	1006.71	20.4998	-16.6601	37.1599	9.29115	-8.24174
6342	2.4099e+06	7.25201e+06	0.0673713	-0.045595	-0.0249101	0.151755	0.854192	13.829	-12.0536	541.635	69.8939	23.6566	34.4223	191.207	78.3248	189.532	92.21	8.08672	20.8243	1036.18	20.9988	-17.8333	38.8321	12.632	-10.2978
6343	2.5099e+06	7.25201e+06	0.067773	-0.0574679	-0.0237292	0.127987	0.680966	13.8842	-12.6002	542.417	71.3146	23.2712	34.9003	194.315	78.1207	194.305	92.7108	8.0998	20.4774	1058.89	21.0593	-18.4959	39.5551	13.8714	-9.93919
6344	2.6099e+06	7.25201e+06	0.0281419	-0.0494461	-0.0267872	0.131578	0.302968	13.7385	-13.0887	565.274	73.6979	24.1326	34.4942	202.178	81.7557	202.094	97.6528	8.16211	20.7164	1071.57	21.0466	-18.3495	39.3962	13.664	-10.3582
6345	2.7099e+06	7.25201e+06	0.020303	-0.0533527	-0.0239182	0.132882	-0.0852337	13.575	-13.6582	569.151	72.2804	24.5559	34.2574	202.848	82.559	202.719	99.2958	8.39285	20.9301	1087.28	21.0442	-19.0499	40.0942	13.456	-10.232
6346	2.8099e+06	7.25201e+06	0.00267155	-0.0412312	-0.0133511	0.155942	-0.496198	13.3612	-14.3344	582.458	71.5228	26.0228	32.68	204.053	86.9066	203.954	102.998	8.86617	21.342	1103.85	21.2101	-20.322	41.5321	13.2762	-11.5452
6347	2.9099e+06	7.25201e+06	0.00469684	-0.0483852	-0.0140315	0.154154	-1.02271	12.9497	-15.373	594.213	71.0166	27.6814	30.8404	203.369	91.7567	202.505	107.977	9.25545	21.6361	1126.1	21.0768	-21.6864	42.7632	12.2008	-10.7762
6348	3.0099e+06	7.25201e+06	0.0198804	-0.0459567	-0.0150172	0.160209	-1.43881	12.6472	-15.9759	601.95	71.8911	28.9216	29.8049	203.74	94.3673	202.984	112.91	8.54963	20.4048	1139.59	20.5075	-21.3722	41.8797	11.8104	-8.38408
6349	3.1099e+06	7.25201e+06	0.0360128	-0.0433765	-0.0160646	0.166642	-1.34503	12.9861	-15.9551	599.091	71.7664	29.1845	29.5543	201.436	93.6938	201.101	115.036	8.34467	19.9101	1157.13	20.6605	-21.2475	41.9081	12.2924	-8.12462
6350	3.2099e+06	7.25201e+06	0.0362026	-0.0358866	-0.0131321	0.184852	-1.27444	13.2165	-15.9135	607.726	71.6225	30.3765	28.3183	200.981	96.8611	198.598	120.048	8.50165	20.0255	1164.17	20.9244	-21.5343	42.4587	9.19286	-7.98511
6351	3.3099e+06	7.25201e+06	0.040381	-0.0389989	-0.0177294	0.169439	-1.56418	13.2532	-16.3734	626.716	73.2583	31.0211	27.7621	206.049	100.031	202.432	124.984	8.79289	20.1322	1182.53	21.3188	-22.3494	43.6682	9.04458	-8.27466
6352	3.4099e+06	7.25201e+06	0.0389039	-0.0346813	-0.0127643	0.187403	-2.07401	13.0436	-17.0469	644.886	77.0322	30.1079	29.2356	216.814	100.187	213.434	124.536	9.43174	21.1336	1201	21.5958	-23.0203	44.616	11.0861	-9.53134
6353	3.5099e+06	7.25201e+06	0.0557485	-0.0488972	0.0030931	0.189533	-3.32822	11.7897	-17.6516	649.076	81.9262	29.287	32.633	229.763	98.23	226.052	111.533	9.15955	20.7643	1184.88	20.3849	-23.6927	44.0776	10.0003	-13.7817
6354	3.6099e+06	7.25201e+06	0.0488762	-0.0434669	0.0103681	0.196392	-3.3807	12.7523	-19.3012	557.931	78.1867	23.5771	38.547	211.533	79.0206	209.454	86.488	9.89399	20.9273	1289.14	21.0797	-26.1618	47.2415	11.0753	-16.1625
6355	3.7099e+06	7.25201e+06	0.0161241	-0.0315769	-0.0048626	0.188808	-3.13346	13.6405	-20.1861	518.113	76.1322	20.8738	42.2803	204.228	69.4973	203.712	75.8448	10.4873	21.2708	1355.24	22.0247	-27.2746	49.2993	13.0529	-16.9061
6356	3.8099e+06	7.25201e+06	0.0161241	-0.0315769	-0.0048626	0.188808	-3.36605	13.4797	-20.4703	519.954	76.1511	20.3477	43.6207	207.222	68.2144	207.109	74.0417	9.86342	20.3709	1357.79	21.5053	-26.8855	48.3908	13.3519	-17.4285
6357	3.9099e+06	7.25201e+06	0.0527612	-0.0373397	-0.00714287	0.182496	-3.47193	13.7219	-20.6488	525.584	75.0859	20.8198	42.8914	206.778	69.9491	206.773	76.6897	9.30873	19.2856	1377.13	21.5453	-26.7153	48.2606	13.7129	-17.9278
6358	4.0099e+06	7.25201e+06	0.0527612	-0.0373397	-0.00714287	0.182496	-3.70477	13.5734	-20.7622	530.916	77.0802	20.4137	43.4125	209.125	69.2077	209.093	77.9325	9.70792	19.8813	1377.57	21.8292	-26.9943	48.8235	13.5278	-18.1275
6359	4.1099e+06	7.25201e+06	0.0497938	-0.0386007	0.0117831	0.196415	-4.0542	13.4171	-21.0524	523.428	75.7906	20.2018	43.271	205.104	68.4281	204.969	77.7925	9.66162	19.697	1384.43	21.7694	-27.2821	49.0515	13.2639	-17.8027
6360	4.2099e+06	7.25201e+06	0.0506909	-0.0461519	0.00996454	0.179993	-4.50657	13.1758	-21.4005	518.447	74.3065	20.1544	43.2023	202.427	67.3012	202.349	77.8354	9.24925	18.9513	1390.17	21.4693	-27.3332	48.8026	13.0938	-15.073
6361	4.3099e+06	7.25201e+06	0.0682496	-0.0436829	0.0092618	0.185446	-4.71058	13.2712	-21.6652	515.867	73.8729	20.0955	43.3059	201.475	66.417	201.35	77.6798	8.82468	18.1522	1406.31	21.4116	-27.2036	48.6152	13.1495	-14.3825
6362	4.4099e+06	7.25201e+06	0.0682496	-0.0436829	0.0092618	0.185446	-4.74173	13.5358	-21.9405	514.137	74.6375	20.3618	43.0039	201.046	67.1856	200.539	78.2069	8.53894	17.5468	1428.81	21.422	-27.2456	48.6676	13.1209	-15.0527
6363	4.5099e+06	7.25201e+06	0.0688739	-0.0593207	0.0022521	0.174064	-4.88545	13.637	-22.4146	513.914	75.6924	20.5925	42.4056	200.599	68.8653	199.335	79.0587	8.56591	17.345	1453.08	21.5047	-27.8751	49.3799	12.6875	-17.6264
6364	4.6099e+06	7.25201e+06	0.0688739	-0.0593207	0.0022521	0.174064	-5.18995	13.5659	-22.782	518.978	75.5608	21.0197	41.0932	200.159	71.2387	199.093	80.3674	9.05394	17.9423	1469.81	21.8014	-28.6375	50.4389	12.617	-20.8192
6365	4.7099e+06	7.25201e+06	0.0783925	-0.0460252	0.00196449	0.192236	-5.44941	13.4664	-23.1157	520.693	73.5073	21.3116	40.4824	199.499	71.6878	199.055	80.9917	9.34063	18.1943	1485.83	21.9077	-29.4254	51.3331	13.0796	-21.259
6366	4.8099e+06	7.25201e+06	0.0783925	-0.0460252	0.00196449	0.192236	-5.58857	13.489	-23.453	533.986	72.857	22.1941	39.305	201.617	74.523	201.318	85.0415	9.68603	18.6418	1496.49	22.1098	-29.8445	51.9543	13.1204	-21.2181
6367	4.9099e+06	7.25201e+06	0.0783925	-0.0460252	0.00196449	0.192236	-5.80001	13.4102	-23.9036	553.192	72.5106	23.4544	37.1214	202.216	78.95	201.194	90.7185	10.2316	19.4338	1507.59	22.3278	-30.3143	52.6421	11.8613	-21.36
6368	5.0099e+06	7.25201e+06	0.0592341	-0.0487752	0.0025156	0.184306	-5.88718	13.5031	-24.3383	559.577	70.8521	24.436	34.9221	198.214	82.0918	194.093	95.7764	10.5998	19.7859	1528.48	22.7139	-30.8605	53.5744	8.86068	-21.3629
6369	5.1099e+06	7.25201e+06	0.0682039	-0.0486158	-0.00567669	0.171831	-5.83632	13.6452	-24.4854	567.604	70.5173	24.6588	34.0128	199.6	83.2015	189.36	100.257	10.4086	19.3405	1539.99	22.9088	-30.9105	53.8192	5.67265	-19.1217
6370	5.2099e+06	7.25201e+06	0.0747531	-0.0611003	0.00529374	0.178659	-5.85134	13.6086	-24.5026	579.779	71.2083	24.5974	33.907	203.926	83.203	190.602	103.798	9.99838	18.7018	1539.37	22.8544	-30.5993	53.4537	5.12427	-16.2698
6371	5.3099e+06	7.25201e+06	0.0446529	-0.0664247	-0.00431106	0.159067	-6.56525	12.9491	-25.2514	593.755	73.306	24.4775	34.4626	209.491	83.3364	200.953	105.418	9.95315	18.6062	1544.55	22.3601	-31.1156	53.4757	7.59149	-16.1962
6372	5.4099e+06	7.25201e+06	0.0487853	-0.0752097	0.00899572	0.166291	-7.36206	12.5269	-26.7711	580.14	73.9722	22.8535	36.5562	210.255	78.0953	207.746	100.988	10.6573	19.2518	1589.76	22.3717	-32.9611	55.3328	11.0387	-16.7569
6373	5.5099e+06	7.25201e+06	0.0330119	-0.0692474	0.0105316	0.171211	-7.98174	12.4111	-28.2844	549.174	73.2888	20.3641	39.3439	208.336	70.6404	208.143	93.8699	11.3689	19.7657	1647.84	22.5021	-35.0275	57.5296	12.2485	-17.6436
6374	5.6099e+06	7.25201e+06	0.0679064	-0.0746853	0.014624	0.17355	-8.45318	12.3536	-29.4878	518.542	72.9742	18.2985	41.1155	201.425	65.239	201.425	86.4436	11.471	19.5427	1695.64	22.3327	-36.4037	58.7364	12.3534	-19.7051
6375	5.7099e+06	7.25201e+06	0.0942579	-0.0733079	0.0225434	0.181821	-8.96243	12.2081	-30.6748	490.922	73.9896	17.0195	43.3264	193.602	60.0873	193.602	77.4446	11.1877	18.8491	1737.95	22.0276	-37.3492	59.3768	12.2081	-24.0676
6376	5.8099e+06	7.25201e+06	0.0942579	-0.0733079	0.0225434	0.181821	-9.43388	12.1639	-31.8519	455.633	72.1545	14.975	46.6768	185.293	52.6781	185.292	67.1375	11.3405	18.7171	1784.68	22.0824	-38.4928	60.5752	12.1621	-27.014
6377	5.9099e+06	7.25201e+06	0.0942579	-0.0733079	0.0225434	0.181821	-9.60377	12.3697	-32.529	419.663	68.0134	12.7561	50.3908	177.74	45.154	177.739	57.3506	11.6221	18.8424	1821.2	22.3184	-39.3694	61.6878	12.3664	-28.4149
6378	6.0099e+06	7.25201e+06	0.0942579	-0.0733079	0.0225434	0.181821	-9.81406	12.3416	-32.7982	385.489	65.3639	10.5624	55.1248	172.1	38.0622	172.1	48.0687	12.0473	19.2816	1832.68	22.384	-40.0925	62.4765	12.3416	-28.6252
6379	6.1099e+06	7.25201e+06	0.0942579	-0.0733079	0.0225434	0.181821	-10.2475	12.1025	-33.2027	360.519	65.3971	8.96209	59.6707	168.579	32.9448	168.579	40.8045	12.7179	20.0259	1842.34	22.4925	-41.0214	63.5139	12.1025	-29.0377
6380	6.2099e+06	7.25201e+06	0.116194	-0.0715035	0.0222163	0.188184	-10.3276	12.3052	-33.5554	345.537	64.6584	8.24913	61.2535	164.096	30.5172	164.096	37.0049	12.9755	20.1591	1866.86	22.8008	-41.5708	64.3716	12.3052	-29.346
6381	6.3099e+06	7.25201e+06	0.116194	-0.0715035	0.0222163	0.188184	-10.0912	12.612	-33.373	342.514	61.6077	8.37646	58.7123	158.79	30.9008	158.79	36.5981	12.8561	19.9825	1873.23	22.9034	-41.4246	64.328	12.612	-29.2039
6382	6.4099e+06	7.25201e+06	0.116194	-0.0715035	0.0222163	0.188184	-9.8823	12.9246	-33.2592	343.408	58.1756	8.78734	55.7505	154.769	32.2495	154.769	37.5946	12.4693	19.4383	1882.91	22.9461	-41.175	64.1212	12.9246	-29.0626
6383	6.5099e+06	7.25201e+06	0.116194	-0.0715035	0.0222163	0.188184	-9.68719	13.1679	-33.0053	341.904	55.7974	8.79482	55.0452	153.24	32.4179	153.24	37.4805	11.7608	18.5656	1883.97	22.8255	-40.4819	63.3074	13.1679	-28.805
6384	6.6099e+06	7.25201e+06	0.116194	-0.0715035	0.0222163	0.188184	-9.74087	13.2741	-32.9893	333.516	53.7864	8.62099	55.8314	151.573	32.0061	151.573	36.4657	11.2414	17.9435	1890.18	22.6574	-39.9433	62.6007	13.2741	-28.8895
6385	6.7099e+06	7.25201e+06	0.101614	-0.0631322	0.0177816	0.194918	-10.1718	13.2151	-33.7857	318.267	51.4035	8.37365	56.11	145.805	31.1337	145.805	35.3496	11.6726	18.3709	1924.42	22.7279	-40.6271	63.355	13.2151	-29.7142
6386	6.8099e+06	7.25201e+06	0.121438	-0.0679128	0.0111904	0.176338	-10.7158	13.1105	-34.9943	296.948	47.7051	7.9778	54.9602	134.287	29.6511	134.287	34.2105	12.7395	19.4833	1974.37	23.0552	-42.1847	65.2399	13.1105	-30.7839
6387	6.9099e+06	7.25201e+06	0.135196	-0.0606563	-0.00806891	0.184213	-10.6199	13.3838	-35.3722	276.006	43.0093	7.67233	52.2507	120.48	28.2233	120.48	33.0113	12.9195	19.5569	2002.91	23.2816	-42.785	66.0666	13.3838	-30.3338
6388	7.0099e+06	7.25201e+06	0.14517	-0.069726	-0.0227382	0.171503	-10.1548	13.8271	-35.0251	267.78	41.9075	7.3396	50.9111	114.396	27.6464	114.396	32.2149	12.2765	18.717	2007.06	23.3916	-42.2078	65.5994	13.8271	-30.119
6389	7.1099e+06	7.25201e+06	0.14517	-0.069726	-0.0227382	0.171503	-9.67136	14.3404	-34.6533	271.232	44.802	7.09359	52.3115	116.981	27.0726	116.981	31.7103	11.3768	17.5112	2010.87	23.6775	-41.3207	64.9982	14.3404	-29.3438
6390	7.2099e+06	7.25201e+06	0.120288	-0.068565	-0.00875987	0.171997	-9.53904	14.8416	-34.8912	273.629	47.311	6.97484	55.7044	121.265	25.5203	121.265	31.1206	10.7954	16.5568	2040.18	24.0454	-41.1797	65.2251	14.8416	-28.63
6391	7.3099e+06	7.25201e+06	0.136992	-0.0605756	-0.00465006	0.198635	-9.8681	15.0263	-35.6592	276.028	46.5008	7.34722	56.724	123.285	25.7826	123.285	31.1024	10.8124	16.4114	2081.2	24.0416	-41.8382	65.8798	15.0263	-30.3824
6392	7.4099e+06	7.25201e+06	0.136992	-0.0605756	-0.00465006	0.198635	-10.3236	14.9468	-36.406	280.178	45.268	7.98903	57.2787	126.133	26.6091	126.133	31.7478	10.7936	16.2937	2110.74	23.8198	-42.3818	66.2016	14.9468	-30.2106
6393	7.5099e+06	7.25201e+06	0.14482	-0.0828236	0.00218299	0.17411	-10.6786	14.5167	-36.4133	300.555	48.8372	8.33853	59.5217	139.011	27.3569	139.011	31.87	10.3517	15.8716	2094	23.0879	-42.072	65.1599	14.5167	-29.1368
6394	7.6099e+06	7.25201e+06	0.164789	-0.0829731	-0.00910341	0.158464	-11.0751	13.7991	-36.1028	331.231	55.6488	8.35515	63.174	158.161	27.243	158.161	30.6993	10.1469	15.9181	2055.35	22.1694	-41.6515	63.8209	13.7991	-30.612
6395	7.7099e+06	7.25201e+06	0.164789	-0.0829731	-0.00910341	0.158464	-11.7761	13.1493	-36.7674	354.001	61.5456	7.72496	67.0533	173.482	25.6212	173.482	28.937	10.858	16.8969	2061.12	21.8743	-42.4634	64.3377	13.1493	-32.0798
6396	7.8099e+06	7.25201e+06	0.182072	-0.0919228	-0.00100476	0.150168	-12.7948	12.5671	-38.2472	351.619	63.7788	7.11323	70.9455	178.882	23.4962	178.882	26.8574	11.5812	17.638	2102.06	21.7449	-43.9498	65.6947	12.5671	-33.6941
6397	7.9099e+06	7.25201e+06	0.181001	-0.0902337	0.00897699	0.154268	-13.7566	11.9915	-39.4436	328.913	63.1839	6.32294	75.3525	176.689	20.814	176.689	24.4379	11.7413	17.6936	2130.75	21.3815	-44.9862	66.3677	11.9915	-35.0822
6398	8.0099e+06	7.25201e+06	0.175627	-0.0926642	0.00461684	0.148845	-13.9927	12.0585	-40.0325	307.145	62.5455	5.35853	79.7056	172.488	18.2978	172.488	21.7645	11.7346	17.4891	2161.36	21.5586	-45.5417	67.1003	12.0585	-35.695
6399	8.1099e+06	7.25201e+06	0.155317	-0.0830196	0.00710879	0.156607	-13.7258	12.2702	-39.6407	303.676	66.0781	4.92943	83.9529	175.829	16.8171	175.829	19.3557	11.6675	17.445	2154.01	21.7652	-45.1478	66.913	12.2702	-35.4985
6400	8.2099e+06	7.25201e+06	0.150055	-0.0767055	0.0105844	0.163372	-13.5962	11.8426	-38.3388	312.138	71.5092	5.07088	87.2502	184.129	16.5883	184.129	17.8995	11.4458	17.6412	2078.92	21.1475	-43.7665	64.914	11.8426	-34.9163
6401	8.3099e+06	7.25201e+06	0.150055	-0.0767055	0.0105844	0.163372	-14.0245	10.9841	-37.7384	303.307	71.9315	4.8897	89.1566	181.511	16.4308	181.511	17.6063	11.2479	17.8679	2019.93	20.1304	-42.8632	62.9936	10.9841	-34.9339
6402	8.4099e+06	7.25201e+06	0.122909	-0.0547095	0.0323475	0.188413	-14.8299	10.7025	-39.1881	278.012	66.4644	4.50745	88.2817	167.085	16.6712	167.085	19.1101	11.4355	17.896	2074.68	19.9054	-44.0859	63.9914	10.7025	-34.6896
6403	8.5099e+06	7.25201e+06	0.132959	-0.04256	0.0282043	0.202604	-15.7533	10.6422	-41.0242	268.224	63.172	4.47894	85.7666	159.539	18.3384	159.539	22.9644	12.0316	18.2323	2156.04	20.1394	-45.9296	66.069	10.6422	-33.5251
6404	8.6099e+06	7.25201e+06	0.124149	-0.056416	0.019907	0.204699	-16.2246	10.2834	-41.1966	274.403	63.3092	5.23836	82.8587	160.134	21.0957	160.134	27.2392	12.7158	19.1818	2153.6	20.0034	-46.4026	66.4061	10.2834	-31.6859
6405	8.7099e+06	7.25201e+06	0.114776	-0.0674997	0.0246884	0.190347	-15.5653	10.0591	-39.1917	284.212	64.4163	6.36137	80.3264	162.616	23.8475	162.601	30.942	12.9938	20.1911	2059.13	19.7085	-44.7477	64.4562	10.0403	-29.0759
6406	8.8099e+06	7.25201e+06	0.143501	-0.0815494	0.0316746	0.176256	-13.7888	10.6237	-35.9721	288.128	63.3236	6.81131	76.8718	160.161	25.5989	159.886	34.8235	12.2984	20.0496	1941.49	19.903	-41.4024	61.3054	10.3646	-25.034
6407	8.9099e+06	7.25201e+06	0.143501	-0.0815494	0.0316746	0.176256	-12.1339	11.6878	-33.7568	290.322	59.471	7.38936	69.9921	152.015	27.9016	151.332	40.4366	10.9515	18.5006	1888.66	20.4973	-38.6267	59.124	10.8547	-20.9592
6408	9.0099e+06	7.25201e+06	0.143501	-0.0815494	0.0316746	0.176256	-11.3493	12.6587	-33.4702	292.541	54.6335	8.21665	60.6684	140.744	31.1946	139.647	47.4866	10.3705	17.4594	1916.86	21.3422	-37.9782	59.3204	10.9293	-16.77
6409	9.1099e+06	7.25201e+06	0.157893	-0.0714528	0.0101167	0.175239	-11.523	12.9068	-34.4174	286.479	51.1166	8.27159	55.2348	130.528	32.1131	129.022	51.8094	10.9875	18.0342	1970.61	21.8268	-38.9409	60.7677	10.6948	-14.3776
6410	9.2099e+06	7.25201e+06	0.169288	-0.0764475	0.0148837	0.168857	-11.7941	12.6249	-34.8592	275.457	49.6241	7.55835	55.2423	124.761	30.0728	122.972	50.541	11.6382	18.9806	1982.04	21.6144	-39.6625	61.2769	10.5561	-13.3317
6411	9.3099e+06	7.25201e+06	0.169288	-0.0764475	0.0148837	0.168857	-12.2378	11.5681	-34.3787	274.306	51.9262	7.66425	59.0394	128.15	29.3162	127.362	46.0813	11.6092	19.3608	1920.34	20.5123	-39.4583	59.9705	10.4955	-16.0006
6412	9.4099e+06	7.25201e+06	0.168304	-0.0933731	0.0206739	0.159885	-12.5031	10.4075	-33.4408	280.984	53.7716	8.22424	61.0951	133.676	30.0045	133.302	43.2803	11.2987	19.551	1832.48	19.1797	-38.6317	57.8114	9.89206	-19.8133
6413	9.5099e+06	7.25201e+06	0.125744	-0.0839234	0.0130164	0.165428	-12.3585	9.4019	-31.5716	297.477	54.7247	9.71415	59.2702	139.402	33.3187	139.164	45.3932	10.8446	19.8431	1714.91	17.9907	-36.6764	54.6671	8.9879	-22.6358
6414	9.6099e+06	7.25201e+06	0.137194	-0.0902739	0.0168896	0.160731	-11.7393	9.18712	-29.6363	309.945	53.4727	10.8827	54.9607	139.875	36.3114	139.306	50.3918	10.582	20.1559	1629.85	17.7119	-34.7851	52.497	8.39885	-22.4656
6415	9.7099e+06	7.25201e+06	0.123798	-0.0698578	0.0087763	0.162886	-11.1541	9.4532	-28.381	320.48	52.2004	12.1682	50.0057	138.028	39.2309	136.828	55.8558	10.6748	20.609	1591.37	18.0671	-33.7092	51.7763	8.09083	-19.4616
6416	9.8099e+06	7.25201e+06	0.0980324	-0.0570946	-0.000648364	0.174164	-10.7072	10.0079	-28.0181	330.529	52.5521	13.0683	46.6554	137.715	41.609	135.184	60.6313	10.6696	20.5314	1596.47	18.5852	-33.3947	51.9799	7.9785	-16.1285
6417	9.9099e+06	7.25201e+06	0.105316	-0.051456	-0.00808491	0.159489	-10.2656	10.4832	-27.6504	348.844	55.5218	14.2762	44.6664	142.843	45.6097	138.137	66.3681	10.3676	20.1042	1598.92	18.8241	-32.7866	51.6107	8.16672	-14.3213
6418	1.00099e+07	7.25201e+06	0.0940489	-0.0594309	-0.00280464	0.166634	-9.41974	11.1021	-26.6802	365.564	58.2222	15.3109	42.9753	146.969	49.5026	139.158	71.9338	10.1772	20.0404	1582.59	19.1962	-31.6002	50.7964	8.77174	-12.84
6419	1.01099e+07	7.25201e+06	0.0670792	-0.052208	-0.015987	0.1572	-8.62924	11.4815	-25.5627	373.121	59.1182	15.8315	41.9949	147.746	52.1471	137.686	74.0476	10.2084	20.4164	1549.43	19.5018	-30.4925	49.9943	9.2442	-12.3619
6420	1.02099e+07	7.25201e+06	0.0670792	-0.052208	-0.015987	0.1572	-8.52011	11.015	-24.7201	374.601	59.3093	16.3585	41.8294	147.693	54.4869	138.481	73.5756	10.097	20.6631	1498.48	19.0206	-29.7989	48.8195	8.94519	-13.3262
6421	1.03099e+07	7.25201e+06	0.0670792	-0.052208	-0.015987	0.1572	-8.68306	10.0272	-23.7422	380.799	59.7051	16.8239	40.7531	148.249	57.4523	140.748	75.9661	9.47713	20.2512	1427.44	17.7967	-28.883	46.6797	8.21541	-15.2063
6422	1.04099e+07	7.25201e+06	0.104744	-0.0773108	-0.00780605	0.159049	-8.33489	9.29816	-22.447	396.83	59.9607	18.0682	37.1763	147.761	62.2821	140.436	84.7616	8.46604	19.2281	1349.27	16.3906	-27.4354	43.826	7.89557	-13.8683
6423	1.05099e+07	7.25201e+06	0.101658	-0.0854514	0.0127459	0.16145	-7.37443	9.17575	-21.0594	411.346	60	17.838	34.3156	145.929	64.0018	135.837	94.7944	7.49999	18.1554	1282.55	15.3375	-25.8075	41.145	8.21629	-9.14572
6424	1.06099e+07	7.25201e+06	0.0744314	-0.0883734	0.0254774	0.172244	-6.97171	8.77645	-20.1615	443.429	63.1369	18.3752	32.8831	152.354	67.7478	138.976	103.486	6.769	17.3222	1227.72	14.387	-24.6425	39.0295	8.04164	-6.56617
6425	1.07099e+07	7.25201e+06	0.10777	-0.100034	0.0450067	0.19027	NA	NA	NA	NA	NA	NA	NA	NA	NA	NA	NA	NA	NA	NA	NA	NA	NA	NA	NA
6426	1.08099e+07	7.25201e+06	0.0994542	-0.0869258	0.0252243	0.179328	NA	NA	NA	NA	NA	NA	NA	NA	NA	NA	NA	NA	NA	NA	NA	NA	NA	NA	NA
6577	-1.01901e+07	7.15201e+06	0.11909	-0.121517	0.0701708	0.153063	NA	NA	NA	NA	NA	NA	NA	NA	NA	NA	NA	NA	NA	NA	NA	NA	NA	NA	NA
6578	-1.00901e+07	7.15201e+06	0.155346	-0.0991921	0.0795176	0.151816	NA	NA	NA	NA	NA	NA	NA	NA	NA	NA	NA	NA	NA	NA	NA	NA	NA	NA	NA
6579	-9.9901e+06	7.15201e+06	0.155346	-0.0991921	0.0795176	0.151816	-2.04772	11.3704	-14.1757	476.912	101.097	17.5044	65.3299	237.344	55.6295	197.524	67.5877	8.22087	22.931	1063.67	16.7691	-19.0534	35.8225	10.2767	-10.5269
6580	-9.8901e+06	7.15201e+06	0.148455	-0.0755167	0.0687325	0.178044	-2.40645	11.6171	-15.2105	455.344	94.3547	17.1802	63.0866	224.201	55.7995	190.588	66.4986	8.55008	22.8198	1118.38	17.4209	-20.0591	37.4801	10.3099	-10.1921
6581	-9.7901e+06	7.15201e+06	0.158235	-0.0667121	0.0608033	0.170259	-2.49714	12.0945	-16.1834	441.762	89.4887	17.4015	61.0827	215.026	56.5326	187.709	67.1536	8.68812	21.9795	1176.27	18.3425	-21.2113	39.5538	10.5971	-8.56733
6582	-9.6901e+06	7.15201e+06	0.163119	-0.0636354	0.0375452	0.164759	-2.37447	12.6179	-16.7109	439.084	85.3531	18.1284	58.0252	208.429	57.8927	188.6	69.8139	8.68461	20.9571	1217.31	19.212	-22.2426	41.4546	10.8987	-7.12186
6583	-9.5901e+06	7.15201e+06	0.173348	-0.0692141	0.0353091	0.160502	-2.48173	12.6353	-16.9308	442.906	82.8794	18.5455	56.0788	206.233	58.8838	192	71.5906	8.82103	20.923	1227.74	19.1986	-22.9811	42.1796	10.8881	-7.29646
6584	-9.4901e+06	7.15201e+06	0.172824	-0.0758361	0.0338091	0.163346	-2.56668	12.6315	-17.0607	442.393	81.2841	17.6199	57.1136	206.072	57.1782	195.788	70.6007	9.6717	22.5493	1236.02	19.3259	-23.7308	43.0566	11.1105	-8.11819
6585	-9.3901e+06	7.15201e+06	0.178735	-0.0656573	0.0240935	0.158209	-2.43127	12.2968	-16.1374	461.601	84.5222	17.5091	59.6527	216.138	58.8689	206.874	73.039	10.2343	24.4072	1188.89	19.2132	-23.0502	42.2634	11.1286	-7.21236
6586	-9.2901e+06	7.15201e+06	0.169299	-0.0589345	0.0206875	0.162533	-2.93702	10.8902	-15.1836	523.608	92.261	20.1984	58.1291	240.213	68.9273	228.843	84.959	9.93579	25.6086	1094.02	17.7792	-21.4097	39.1889	10.061	-6.72811
6587	-9.1901e+06	7.15201e+06	0.177261	-0.0516996	0.0151754	0.156162	-3.74028	9.45367	-14.8886	552.648	93.4254	21.3587	54.9296	248.803	75.5248	238.055	91.7106	9.38034	25.8561	1022.6	16.2762	-20.2397	36.5159	8.74965	-6.94922
6588	-9.0901e+06	7.15201e+06	0.139348	-0.0558524	0.0157238	0.146403	-3.584	10.1465	-15.3949	467.704	80.3438	16.3775	56.1472	214.308	62.1945	210.163	75.3004	9.80612	25.8256	1066.37	17.2827	-20.7929	38.0756	9.55306	-7.09977
6589	-8.9901e+06	7.15201e+06	0.149101	-0.0610275	0.0143424	0.143129	-3.88377	10.3014	-16.343	370.79	70.1475	10.9691	63.7992	183.356	45.466	183.078	56.4978	10.0373	25.2478	1111.41	17.6368	-22.0928	39.7296	10.1961	-8.84833
6590	-8.8901e+06	7.15201e+06	0.157736	-0.052823	0.0103586	0.150482	-4.69569	9.38932	-17.1381	348.35	70.7425	9.49878	70.2236	182.479	39.8626	182.477	50.1197	10.4249	25.8361	1110.27	16.9733	-23.2718	40.2451	9.38777	-11.0991
6591	-8.7901e+06	7.15201e+06	0.157449	-0.0539592	0.0152731	0.150227	-5.30301	9.06781	-18.3966	361.007	75.1827	10.7974	71.8763	191.387	40.0786	191.387	47.1063	10.668	25.7424	1147.22	16.7726	-24.7046	41.4772	9.06781	-12.9431
6592	-8.6901e+06	7.15201e+06	0.157449	-0.0539592	0.0152731	0.150227	-4.75664	11.6883	-21.614	324.198	71.9237	8.65883	76.6567	177.918	30.1351	177.918	35.71	11.7532	24.3801	1378	19.8469	-28.4397	48.2866	11.6883	-12.5637
6593	-8.5901e+06	7.15201e+06	0.151389	-0.0218548	-0.00254998	0.150402	-5.14271	11.855	-23.152	299.797	70.0716	7.74273	81.5827	171.332	25.4393	171.332	29.7471	12.0374	23.9195	1440.6	20.1331	-30.2316	50.3647	11.855	-12.8249
6594	-8.4901e+06	7.15201e+06	0.169954	-0.0351668	0.000343833	0.14339	-5.1601	11.6417	-23.0104	295.932	64.7336	7.95846	73.0935	158.893	26.5407	158.892	35.087	12.091	24.0481	1420.5	19.981	-30.3526	50.3337	11.6411	-12.5774
6595	-8.3901e+06	7.15201e+06	0.194745	-0.0390416	-0.00229557	0.14271	-4.45587	12.18	-22.3447	303.52	59.5728	7.73018	60.6181	144.822	29.1131	144.753	45.9489	12.5539	24.531	1412.96	20.7816	-30.4467	51.2284	12.1338	-11.6053
6596	-8.2901e+06	7.15201e+06	0.176615	-0.0412357	-0.00139443	0.139296	-4.16581	11.7098	-20.6844	323.082	60.3373	8.22389	56.5588	146.831	32.6768	146.296	52.7859	12.3404	25.0711	1327.47	20.1779	-29.1168	49.2947	11.3195	-10.9445
6597	-8.1901e+06	7.15201e+06	0.169519	-0.047376	0.00304496	0.14449	-4.32257	11.0868	-19.7458	335.241	62.4887	10.0435	55.8292	151.799	36.7078	151.547	53.1427	11.913	25.2848	1266.93	19.2322	-27.9362	47.1683	10.8301	-10.9756
6598	-8.0901e+06	7.15201e+06	0.178291	-0.0472314	0.00201666	0.139488	-4.90752	10.7031	-20.204	358.475	64.4979	13.3856	52.5498	158.272	44.6374	158.218	56.2052	11.9799	25.5704	1274.05	18.7826	-28.0778	46.8604	10.632	-11.8233
6599	-7.9901e+06	7.15201e+06	0.186248	-0.0533776	0.00546584	0.13634	-6.01475	9.72903	-20.9881	429.101	72.0889	18.8295	48.0335	181.667	60.2558	181.663	67.8022	11.7378	25.3718	1270.51	17.7064	-28.5541	46.2606	9.72091	-13.3903
6600	-7.8901e+06	7.15201e+06	0.186248	-0.0533776	0.00546584	0.13634	-7.27412	8.543	-21.7192	506.743	81.4187	23.3682	45.5692	210.577	75.2247	210.572	80.7233	11.1126	24.523	1258.5	16.3495	-28.9644	45.3139	8.53219	-15.228
6601	-7.7901e+06	7.15201e+06	0.183988	-0.0510349	-0.00199018	0.122723	-7.80007	8.14329	-22.1314	528.072	85.6171	23.7722	46.8606	225.245	76.8444	225.245	84.0051	10.7082	23.827	1264.72	15.7998	-29.1572	44.9571	8.14329	-15.6946
6602	-7.6901e+06	7.15201e+06	0.167678	-0.0522034	0.00363455	0.130506	-6.74896	10.27	-22.8687	467.889	78.8724	18.9601	51.0392	209.878	62.9974	209.878	72.6665	10.8656	22.7708	1376.8	18.0904	-29.7058	47.7962	10.27	-15.3156
6603	-7.5901e+06	7.15201e+06	0.16585	-0.0537284	0.0235292	0.134493	-5.39969	13.1273	-24.152	400.251	68.3986	14.6075	53.9878	184.21	48.7022	184.21	58.6356	11.1985	21.5621	1537.48	21.2139	-30.7516	51.9655	13.1273	-14.5229
6604	-7.4901e+06	7.15201e+06	0.183953	-0.0263267	0.0177127	0.154078	-4.75717	14.0843	-24.0605	373.453	62.7543	14.39	52.7021	169.229	46.612	169.229	52.9518	11.2415	21.3118	1569.92	22.2876	-30.4908	52.7784	14.0843	-14.4783
6605	-7.3901e+06	7.15201e+06	0.164116	-0.015934	0.00674249	0.167032	-4.54526	14.108	-23.437	356.144	57.902	15.0731	48.6431	154.851	48.2943	154.81	51.6583	11.2026	21.4506	1544.1	22.3506	-29.9022	52.2528	14.0707	-14.7683
6606	-7.2901e+06	7.15201e+06	0.1194	-0.0401298	0.018541	0.156468	-4.35809	14.3722	-23.2288	324.165	49.7229	13.7428	43.4944	132.354	46.4361	131.231	50.903	11.1855	21.3076	1544.68	22.6605	-29.8338	52.4943	13.5306	-14.1351
6607	-7.1901e+06	7.15201e+06	0.141455	-0.0371634	0.0180778	0.161656	-4.63369	14.1372	-23.4868	298.048	44.5814	11.3828	42.3917	118.963	41.3363	115.067	49.9514	10.8557	20.7204	1544.4	22.1913	-30.1885	52.3798	12.1794	-14.857
6608	-7.0901e+06	7.15201e+06	0.166102	-0.0710122	0.0387259	0.153009	-5.01861	13.9443	-24.4035	278.315	42.9219	8.93111	45.0806	112.171	34.9641	106.877	47.4434	10.0283	19.0783	1569.35	21.3325	-31.1685	52.501	11.9232	-15.7367
6609	-6.9901e+06	7.15201e+06	0.162328	-0.0650865	0.0396779	0.149412	-5.61911	13.7197	-25.3122	271.924	42.6718	7.22651	47.921	110.778	30.6256	106.229	46.2907	8.85227	16.9242	1593.77	20.4088	-31.7692	52.178	11.7465	-16.6942
6610	-6.8901e+06	7.15201e+06	0.162328	-0.0650865	0.0396779	0.149412	-6.25554	12.935	-25.4275	274.827	43.5687	7.93268	48.474	112.792	30.9581	110.21	46.2984	8.15325	16.0218	1569.41	19.4299	-31.4359	50.8658	11.1668	-17.4754
6611	-6.7901e+06	7.15201e+06	0.173333	-0.0666705	0.0509838	0.141589	-6.92703	12.2867	-25.8058	283.245	46.3573	9.75908	49.2736	119.052	33.5533	116.448	44.0523	8.17954	16.1271	1563.23	18.9336	-31.7313	50.6648	10.7181	-19.3772
6612	-6.6901e+06	7.15201e+06	0.132599	-0.0617939	0.0464788	0.139153	-7.63379	12.2196	-26.8176	293.754	49.6015	10.4871	51.5622	127.251	35.0134	122.127	38.4975	8.67215	16.5941	1604.49	19.2809	-32.8704	52.1513	10.4475	-24.2211
6613	-6.5901e+06	7.15201e+06	0.17743	-0.0517406	0.051495	0.147524	-8.32934	11.8902	-27.5176	304.285	50.6454	10.2633	51.9773	131.758	34.5803	124.74	34.9524	9.05202	17.0345	1621.98	19.3967	-33.6884	53.085	10.1201	-27.0778
6614	-6.4901e+06	7.15201e+06	0.182345	-0.0308551	0.0455773	0.181501	-8.68916	11.4333	-27.612	301.843	49.5011	9.32707	53.3052	132.671	32.2981	124.411	32.2997	9.26916	17.4375	1605.97	19.2772	-33.8638	53.1409	9.79173	-27.5895
6615	-6.3901e+06	7.15201e+06	0.182345	-0.0308551	0.0455773	0.181501	-8.97962	11.0691	-27.6281	292.246	47.4938	8.03945	55.6883	131.434	29.5333	122.055	29.5349	9.36371	17.6474	1587.78	19.3248	-33.7338	53.0586	9.46167	-27.57
6616	-6.2901e+06	7.15201e+06	0.184763	-0.0133315	0.0459574	0.208944	-9.41035	10.5415	-27.8809	282.674	46.5734	6.64488	58.928	130.555	26.5738	119.42	26.584	9.23933	17.5098	1576.77	18.9909	-33.7701	52.761	9.0537	-27.5727
6617	-6.1901e+06	7.15201e+06	0.180816	-0.0601682	0.0669538	0.195428	-9.95039	9.48275	-28.2786	273.566	46.3104	5.67332	62.054	129.78	24.1794	117.954	24.2633	8.82978	17.1493	1558.15	17.5156	-33.9875	51.5032	8.46672	-27.6391
6618	-6.0901e+06	7.15201e+06	0.17202	-0.0871116	0.0563461	0.208332	-10.3799	9.28983	-28.8973	275.255	47.0476	5.89701	63.4476	133.479	24.3309	118.936	24.4967	8.66387	16.7004	1577.21	17.3814	-34.5104	51.8918	8.35736	-28.1812
6619	-5.9901e+06	7.15201e+06	0.17202	-0.0871116	0.0563461	0.208332	-10.5354	9.23861	-29.1799	280.554	47.5085	6.57056	63.4309	137.253	25.4939	120.753	26.1138	8.41214	16.1975	1588.6	17.2411	-34.6957	51.9368	8.43286	-28.4784
6620	-5.8901e+06	7.15201e+06	0.17202	-0.0871116	0.0563461	0.208332	-10.6818	9.14865	-29.4097	287.178	49.7563	7.47428	62.4392	139.939	27.7834	120.799	29.0977	8.0563	15.5596	1597.51	16.8971	-34.8686	51.7657	8.44784	-28.8022
6621	-5.7901e+06	7.15201e+06	0.150792	-0.0767754	0.0623698	0.220319	-10.656	9.02134	-29.2113	295.867	52.9762	8.28212	59.7277	140.9	31.212	121.722	33.2308	7.57429	15.0338	1586.82	16.4231	-34.6923	51.1154	8.39207	-28.8048
6622	-5.6901e+06	7.15201e+06	0.171977	-0.0803127	0.068835	0.203956	-10.5661	8.76351	-28.8084	305.724	55.2072	9.02611	56.9382	141.976	34.2113	122.4	36.2796	7.19927	14.8863	1562.26	15.9345	-34.3249	50.2594	8.22679	-28.5705
6623	-5.5901e+06	7.15201e+06	0.183781	-0.0924166	0.0638468	0.167881	-10.7431	8.67501	-29.0506	298.973	54.5631	8.16949	58.7739	140.79	30.9993	121.709	33.0574	7.27024	14.4591	1568.26	16.1258	-34.5403	50.6661	8.10732	-28.7922
6624	-5.4901e+06	7.15201e+06	0.136655	-0.0777478	0.0635304	0.194704	NA	NA	NA	NA	NA	NA	NA	NA	NA	NA	NA	NA	NA	NA	NA	NA	NA	NA	NA
6683	409904	7.15201e+06	0.00833197	-0.0534653	0.0310982	0.16014	NA	NA	NA	NA	NA	NA	NA	NA	NA	NA	NA	NA	NA	NA	NA	NA	NA	NA	NA
6684	509904	7.15201e+06	0.0278895	-0.0523692	0.0084282	0.143311	3.84743	10.8909	-2.20257	1307.57	155.43	55.7991	29.2843	430.655	202.64	276.286	390.725	5.33066	27.0497	542.894	14.9337	-4.7324	19.6661	1.54336	5.38875
6685	609904	7.15201e+06	0.0212278	-0.0533985	0.0127405	0.154834	2.21478	10.4016	-4.9062	929.133	110.557	46.3374	27.7551	302.778	156.611	257.975	237.014	6.73996	28.5167	631.429	15.5828	-8.04989	23.6327	6.67659	1.00897
6686	709904	7.15201e+06	0.0727669	-0.0560583	0.0164932	0.164006	0.835793	10.256	-7.55008	839.854	102.158	46.2617	27.4085	282.611	144.967	266.369	189.306	7.76792	27.7565	728.347	16.1121	-11.823	27.9351	9.15972	-2.15982
6687	809904	7.15201e+06	0.0860364	-0.0603816	0.0249453	0.179979	0.651565	10.6599	-8.54536	697.776	94.02	35.9811	32.5272	248.878	115.439	245.029	134.136	8.79337	28.7265	781.235	16.9159	-13.6116	30.5274	10.0532	-4.73434
6688	909904	7.15201e+06	0.0527426	-0.0436241	0.0228959	0.192962	2.1027	12.4819	-7.67993	606.432	89.1714	27.5411	37.0003	228.505	92.641	228.347	103.118	8.54924	27.4088	815.419	18.8855	-12.2789	31.1644	12.4148	-5.49637
6689	1.0099e+06	7.15201e+06	-0.031472	-0.0562552	0.0185834	0.146829	2.3098	13.0985	-7.93674	639.434	89.147	29.6346	33.7248	232.04	102.86	228.408	116.937	8.90694	27.5548	847.799	19.7309	-12.5991	32.3301	12.4615	-4.59819
6690	1.1099e+06	7.15201e+06	-0.016662	-0.0662459	0.0126286	0.141808	2.9714	13.5236	-6.68205	672.608	83.6275	33.5882	29.6558	228.661	113.584	208.679	136.789	8.14601	26.4166	817.686	19.6554	-11.1329	30.7883	9.61758	-1.83484
6691	1.2099e+06	7.15201e+06	0.00110455	-0.0639392	0.0124112	0.148751	NA	NA	NA	NA	NA	NA	NA	NA	NA	NA	NA	NA	NA	NA	NA	NA	NA	NA	NA
6692	1.3099e+06	7.15201e+06	0.00911021	-0.0418705	0.00338697	0.159874	3.8981	14.3891	-5.6732	544.283	66.2379	26.4053	31.6032	187.853	85.3044	169.812	106.453	6.76737	22.2898	817.906	19.7589	-10.3118	30.0707	11.3908	-2.52825
6693	1.4099e+06	7.15201e+06	-0.00205997	-0.0496885	-0.000116592	0.127324	3.11524	14.1456	-7.13988	559.593	75.4115	25.1152	35.2684	205.237	84.1421	198.283	102.256	8.4023	25.4274	860.826	20.8835	-12.1238	33.0073	12.5523	-3.32791
6694	1.5099e+06	7.15201e+06	0.0109953	-0.0404742	-0.000204415	0.139028	2.71391	14.1541	-7.96871	598.488	80.5582	27.6717	34.4433	219.519	93.7854	217.505	108.692	8.34006	24.7305	891.724	21.0211	-12.7003	33.7214	12.809	-3.86984
6695	1.6099e+06	7.15201e+06	-0.026399	-0.0526022	-0.00459244	0.120782	2.71321	14.4656	-8.41161	618.392	83.7467	29.9583	33.8436	226.346	99.0128	225.739	114.451	7.85164	23.1281	920.22	20.9449	-12.996	33.9409	14.0846	-4.03561
6696	1.7099e+06	7.15201e+06	-0.019498	-0.0434238	-0.00833914	0.128548	2.59301	14.6601	-8.92716	634.08	82.1935	32.6283	31.1586	223.855	102.736	223.655	123.354	7.69668	22.3007	947.57	20.966	-13.5314	34.4974	14.3488	-4.24719
6697	1.8099e+06	7.15201e+06	-0.000329054	-0.0524232	-0.014221	0.122393	2.28076	14.5495	-9.47671	634.618	80.6891	33.0542	30.8339	221.276	102.241	220.868	124.957	8.0458	22.6668	964.899	21.1432	-14.345	35.4883	14.1282	-4.59517
6698	1.9099e+06	7.15201e+06	0.0117692	-0.0505671	-0.015019	0.126491	1.7974	14.1592	-10.0275	634.51	82.5572	30.7822	33.5127	225.851	98.1381	223.727	118.487	7.8348	22.1451	971.749	20.7306	-14.6521	35.3827	12.8016	-5.78031
6699	2.0099e+06	7.15201e+06	0.0063271	-0.0444574	-0.0129442	0.140621	1.63553	14.0988	-10.3706	604.785	82.9081	27.2074	36.1687	220.837	90.9623	218.451	103.588	7.53328	21.2366	983.678	20.3826	-15.0864	35.469	12.835	-7.31417
6700	2.1099e+06	7.15201e+06	0.00156755	-0.0450189	-0.0131964	0.142333	1.71493	14.0818	-10.2972	628.085	82.6078	29.922	32.7843	221.078	98.5576	213.931	113.498	7.84487	21.9785	978.972	20.6869	-14.9974	35.6843	10.7321	-6.1558
6701	2.2099e+06	7.15201e+06	0.00156755	-0.0450189	-0.0131964	0.142333	1.33835	13.7344	-10.9988	619.7	79.5781	28.5061	33.4073	221.615	95.0616	203.271	110.338	8.08248	22.1379	996.103	20.7846	-15.7195	36.5041	7.86658	-8.26989
6702	2.3099e+06	7.15201e+06	0.00661459	-0.0444802	-0.0122075	0.151896	1.30699	13.974	-11.2168	595.848	78.3686	26.366	34.0271	212.356	89.5784	202.521	102.665	8.11175	21.6452	1012.95	21.1427	-16.3311	37.4738	9.12496	-8.97405
6703	2.4099e+06	7.15201e+06	0.00661459	-0.0444802	-0.0122075	0.151896	1.15163	14.0373	-11.7196	573.847	76.9146	25.0495	34.6398	204.418	84.0051	203.724	97.181	8.25933	21.3896	1031.69	21.2707	-17.3504	38.621	13.4013	-10.0609
6704	2.5099e+06	7.15201e+06	0.0246516	-0.046303	-0.0223215	0.146758	1.03706	14.2773	-12.3578	581.783	75.8739	25.9932	33.2069	204.66	86.3008	204.659	102.866	8.142	20.6129	1063.04	21.4936	-18.008	39.5015	14.2753	-9.86007
6705	2.6099e+06	7.15201e+06	0.0246516	-0.046303	-0.0223215	0.146758	1.02802	14.3569	-12.2772	575.413	75.8	25.1413	33.815	206.231	84.7825	206.231	101.599	7.93116	20.4303	1064.5	21.3655	-17.4566	38.8221	14.3569	-8.92503
6706	2.7099e+06	7.15201e+06	0.0246516	-0.046303	-0.0223215	0.146758	0.707855	14.189	-12.6403	583.105	75.2259	25.0264	33.9909	209.99	84.9593	209.99	103.299	8.2631	20.9716	1071.79	21.4076	-17.9865	39.394	14.189	-9.02298
6707	2.8099e+06	7.15201e+06	0.017119	-0.0501889	-0.0196507	0.147617	0.33534	13.9416	-13.1504	582.532	73.1731	24.3526	34.4141	209.396	83.7667	209.396	100.769	8.6073	21.3873	1081.26	21.472	-18.772	40.244	13.9416	-9.62763
6708	2.9099e+06	7.15201e+06	0.00625441	-0.0508059	-0.0248555	0.149293	0.0563343	13.8136	-13.7963	583.15	71.8839	24.5536	33.7458	207.313	85.1047	207.304	100.843	8.74082	21.4443	1100.5	21.4506	-19.3073	40.758	13.7975	-10.6722
6709	3.0099e+06	7.15201e+06	0.00625441	-0.0508059	-0.0248555	0.149293	-0.248309	13.6468	-14.4876	593.498	70.7709	27.1765	30.7287	203.427	90.2874	203.403	110.4	8.60676	21.0733	1118.44	21.1213	-19.7254	40.8467	13.6063	-7.61089
6710	3.1099e+06	7.15201e+06	0.00625441	-0.0508059	-0.0248555	0.149293	-0.382753	13.8426	-14.8226	590.722	70.2658	28.4166	30.1599	201.014	90.8203	201.008	113.175	8.39169	20.1341	1145.88	21.4809	-20.2079	41.6888	13.8321	-6.94136
6711	3.2099e+06	7.15201e+06	0.0210643	-0.0415485	-0.0234366	0.170755	-0.620944	13.5881	-15.1268	605.604	70.2888	29.9018	28.8184	202.707	94.7409	202.638	118.691	8.56154	20.3802	1151.54	21.3359	-20.674	42.0099	13.4149	-7.16178
6712	3.3099e+06	7.15201e+06	0.00725496	-0.0437338	-0.0219232	0.166467	-0.83726	13.4511	-15.3429	627.402	71.0604	31.1581	27.6484	205.161	99.0979	204.754	125.32	8.58568	20.3535	1154.57	21.2052	-20.9782	42.1834	12.4949	-7.37864
6713	3.4099e+06	7.15201e+06	-0.00640904	-0.0420911	-0.0164373	0.176564	-1.09787	13.5698	-15.889	647.721	74.3533	30.972	28.1316	212.684	100.556	211.981	127.624	9.09644	20.9217	1179.15	21.6884	-21.7662	43.4547	12.7931	-7.70312
6714	3.5099e+06	7.15201e+06	0.0193027	-0.046098	-0.0134218	0.178287	-1.77416	13.3008	-16.7214	675.11	81.0507	31.2794	29.8177	228.472	104.229	225.524	125.389	9.80695	21.537	1204.39	22.2578	-23.2681	45.5259	11.751	-9.99414
6715	3.6099e+06	7.15201e+06	0.0251721	-0.0556603	-0.00705007	0.170758	-2.47728	12.8586	-17.5452	647.24	84.245	28.3815	34.7051	234.079	95.703	230.332	107.172	9.90889	21.1762	1224.63	21.9323	-24.8461	46.7783	11.0277	-13.9593
6716	3.7099e+06	7.15201e+06	0.0300487	-0.0418354	-0.0123657	0.176357	-2.23658	13.798	-18.5988	559.332	80.9512	22.1292	41.4942	217.817	75.4558	216.865	82.8541	10.3748	21.5505	1300.25	22.3248	-25.8135	48.1383	12.8822	-15.3885
6717	3.8099e+06	7.15201e+06	0.0027128	-0.0372478	-0.0152811	0.176258	-2.17783	14.3096	-19.3586	525.764	78.9135	19.8908	44.7084	212.037	67.6227	212.013	74.3654	10.581	21.6427	1348.98	22.6772	-26.206	48.8832	14.2612	-16.1622
6718	3.9099e+06	7.15201e+06	0.0247706	-0.0399376	-0.0223727	0.176706	-2.44346	14.3078	-19.5941	535.145	77.983	20.5781	43.982	214.275	69.9458	214.275	77.2023	9.78425	20.2516	1362.55	22.2624	-26.033	48.2954	14.3078	-16.8846
6719	4.0099e+06	7.15201e+06	0.0400979	-0.037332	-0.0235748	0.183246	-2.50816	14.2461	-19.3784	561.312	80.6762	21.7823	42.5489	220.644	74.6691	220.644	83.9137	9.28536	19.5304	1348.51	22.1338	-25.3947	47.5285	14.2461	-16.2624
6720	4.1099e+06	7.15201e+06	0.0400979	-0.037332	-0.0235748	0.183246	-2.80204	14.0759	-19.6869	568.007	81.9543	21.5854	42.5225	222.012	74.5633	222.012	85.0324	9.42215	19.636	1351.98	22.0937	-25.878	47.9717	14.0759	-16.1454
6721	4.2099e+06	7.15201e+06	0.0329596	-0.0317158	-0.0173283	0.189708	-3.18607	14.009	-20.2359	549.166	78.639	20.6895	43.4768	216.573	70.4154	216.573	82.323	9.52084	19.5626	1370.96	22.0753	-26.5919	48.6671	14.009	-14.39
6722	4.3099e+06	7.15201e+06	0.0356013	-0.0355436	0.00681431	0.204089	-3.56704	13.9409	-20.707	538.169	76.5757	20.7868	43.3092	212.603	69.0373	212.603	81.6543	9.33105	19.1128	1386.84	22.0106	-26.8045	48.815	13.9409	-12.5561
6723	4.4099e+06	7.15201e+06	0.052657	-0.032721	0.00600657	0.210346	-3.66008	14.0892	-20.8197	534.309	76.3752	20.6229	43.6292	211.516	67.5689	211.515	80.9342	9.04292	18.6287	1398.42	22.0734	-26.4652	48.5385	14.0886	-12.8095
6724	4.5099e+06	7.15201e+06	0.0538421	-0.056676	-0.00358941	0.181761	-3.60974	14.3701	-21.0211	534.715	77.5615	20.6676	43.5978	211.692	67.9653	211.665	81.0777	8.72882	17.9453	1417.9	22.0799	-26.5687	48.6487	14.3346	-13.7099
6725	4.6099e+06	7.15201e+06	0.0538421	-0.056676	-0.00358941	0.181761	-3.82225	14.3945	-21.5628	536.67	78.7867	20.7609	43.1924	212.037	69.761	211.988	80.7984	8.5775	17.437	1443.09	22.0138	-27.1743	49.1882	14.3409	-16.6226
6726	4.7099e+06	7.15201e+06	0.0527436	-0.0479807	-0.00111538	0.199822	-4.29651	14.0608	-21.9464	532.115	78.0668	20.13	43.7559	211.391	68.5189	211.278	77.8983	8.89555	17.8305	1456.15	21.9716	-27.9101	49.8816	14.0077	-19.7687
6727	4.8099e+06	7.15201e+06	0.0527436	-0.0479807	-0.00111538	0.199822	-4.62784	13.8345	-22.1709	533.019	76.7206	20.114	43.766	212.25	68.3727	212.225	77.4604	9.32334	18.4195	1461.92	22.0121	-28.5997	50.6119	13.8248	-20.5222
6728	4.9099e+06	7.15201e+06	0.0673109	-0.0508271	0.00444894	0.191778	-4.82733	13.7467	-22.3982	551.367	77.4919	21.312	42.1425	215.946	72.3241	215.93	82.5058	9.79471	19.1773	1461.1	22.2074	-28.8603	51.0677	13.7229	-20.2611
6729	5.0099e+06	7.15201e+06	0.049128	-0.0533335	0.00490213	0.184119	-4.9427	13.8184	-22.8105	570.344	77.3499	23.1705	39.0206	214.01	78.3457	213.667	89.8866	10.3997	19.971	1476.66	22.7531	-29.3098	52.0629	13.3929	-20.261
6730	5.1099e+06	7.15201e+06	0.049128	-0.0533335	0.00490213	0.184119	-5.135	13.7793	-23.3008	582.557	75.1273	24.5814	36.1071	209.649	83.0083	207.662	96.2436	10.8717	20.5123	1493.78	23.1317	-29.8725	53.0042	11.7297	-20.3887
6731	5.2099e+06	7.15201e+06	0.0452432	-0.0457812	-0.00744504	0.176789	-5.15564	13.8795	-23.6494	586.071	72.9921	25.0987	34.2224	205.812	84.8804	200.043	101.228	10.8648	20.3017	1511.71	23.3487	-30.1706	53.5193	9.15227	-18.7311
6732	5.3099e+06	7.15201e+06	0.041854	-0.0594626	-0.00351137	0.167434	-4.84771	14.2102	-23.4532	586.441	71.7973	24.8978	33.353	204.196	84.3975	193.437	105.13	10.3127	19.3799	1518.1	23.4436	-29.745	53.1886	6.95873	-15.0924
6733	5.4099e+06	7.15201e+06	0.028556	-0.0527558	-0.00765067	0.171906	-5.00879	14.0609	-23.561	595.086	72.3751	24.6027	33.1564	205.601	84.0923	196.463	107.426	9.97286	18.8608	1517.77	23.209	-29.6536	52.8626	7.61535	-14.1684
6734	5.5099e+06	7.15201e+06	0.0297097	-0.0576381	-0.012456	0.153458	-5.88662	13.3899	-24.8303	597.11	73.604	23.769	34.2977	208.68	82.0578	205.078	105.953	10.6495	19.6284	1541.63	23.0786	-31.1404	54.2191	10.8942	-14.973
6735	5.6099e+06	7.15201e+06	0.0357826	-0.0868899	0.0152799	0.155473	-7.03699	12.4929	-26.4713	585.543	75.155	22.4045	36.5129	212.708	78.317	211.969	100.963	11.4415	20.5262	1571.99	22.6723	-33.0639	55.7362	11.9237	-16.5994
6736	5.7099e+06	7.15201e+06	0.0302887	-0.0782746	0.0148823	0.158936	-7.70034	12.222	-27.8524	558.693	76.6539	20.6999	38.7476	209.363	72.6545	209.296	93.8608	11.675	20.5632	1617.24	22.4126	-34.4104	56.823	12.1378	-18.308
6737	5.8099e+06	7.15201e+06	0.073889	-0.0749833	0.0228471	0.175913	-7.89044	12.5347	-28.9911	525.182	77.405	19.0148	40.8171	199.157	66.6102	199.153	84.8341	11.353	19.6357	1676.35	22.443	-35.4501	57.8931	12.5251	-21.8786
6738	5.9099e+06	7.15201e+06	0.0942579	-0.0733079	0.0225434	0.181821	-8.36962	12.4859	-30.1101	497.886	77.3814	17.2247	43.3556	192.678	60.7909	192.6	75.5541	11.2708	19.1611	1720.97	22.2991	-36.5437	58.8428	12.3314	-25.8475
6739	6.0099e+06	7.15201e+06	0.0942579	-0.0733079	0.0225434	0.181821	-8.52584	12.7933	-30.9957	452.17	72.3386	14.7929	46.4326	182.432	52.3602	182.305	64.9059	11.7474	19.4872	1769.9	22.7883	-37.4939	60.2823	12.572	-26.9039
6740	6.1099e+06	7.15201e+06	0.0942579	-0.0733079	0.0225434	0.181821	-8.65454	12.7831	-31.1869	411.151	67.3796	12.3537	50.2834	174.803	44.2794	174.795	55.3131	12.2767	20.0935	1778.76	23.0047	-38.0803	61.085	12.7674	-27.093
6741	6.2099e+06	7.15201e+06	0.0942579	-0.0733079	0.0225434	0.181821	-8.87567	12.6579	-31.4286	377.092	64.5368	10.3833	54.0683	167.667	38.1909	167.667	47.1217	12.9974	20.8519	1787.71	23.201	-39.1223	62.3232	12.6579	-27.244
6742	6.3099e+06	7.15201e+06	0.0942579	-0.0733079	0.0225434	0.181821	-9.00622	12.7531	-31.6853	355.289	63.3192	9.10597	56.8696	162.778	34.1582	162.778	41.5411	13.3161	21.1132	1805.15	23.3488	-39.7401	63.0889	12.7531	-27.4949
6743	6.4099e+06	7.15201e+06	0.0942579	-0.0733079	0.0225434	0.181821	-9.01245	13.0017	-31.9281	345.753	61.2785	8.8382	56.5669	158.369	33.0785	158.369	39.7844	13.4772	21.1308	1826.47	23.565	-40.2388	63.8038	13.0017	-27.7571
6744	6.5099e+06	7.15201e+06	0.116194	-0.0715035	0.0222163	0.188184	-8.80664	13.3747	-31.87	344.366	58.2029	9.07752	54.0376	153.708	33.8564	153.708	40.1253	13.2862	20.7837	1841.29	23.7366	-40.1993	63.9359	13.3747	-27.694
6745	6.6099e+06	7.15201e+06	0.116194	-0.0715035	0.0222163	0.188184	-8.53616	13.6594	-31.4729	346.659	56.0434	9.47592	52.0769	151.637	35.2424	151.637	40.838	12.5486	19.9046	1838.6	23.5735	-39.4482	63.0217	13.6594	-27.3126
6746	6.7099e+06	7.15201e+06	0.0997498	-0.0711607	0.0178672	0.170316	-8.2351	13.9378	-30.8943	340.861	53.9448	9.55317	52.4733	150.137	34.941	150.137	40.2533	11.4589	18.6326	1827.8	23.2554	-38.1717	61.4271	13.9378	-26.8643
6747	6.8099e+06	7.15201e+06	0.121076	-0.0693436	0.017379	0.176017	-8.10039	14.1501	-30.6802	328.213	51.4166	9.24303	53.2439	146.224	33.7402	146.224	39.2924	10.6055	17.5655	1828.63	23.0092	-37.1937	60.2029	14.1501	-26.7128
6748	6.9099e+06	7.15201e+06	0.121076	-0.0693436	0.017379	0.176017	-8.49096	14.114	-31.4799	314.53	49.174	8.7069	52.4956	139.52	32.9948	139.52	38.5573	11.1742	18.1632	1863.45	23.2372	-37.9932	61.2304	14.114	-27.4151
6749	7.0099e+06	7.15201e+06	0.111747	-0.0776377	-0.00312309	0.15967	-8.77648	13.9683	-32.1561	299.555	46.5241	8.39871	51.201	131.1	32.1653	131.1	37.5611	11.7347	18.8471	1887.97	23.3236	-38.7766	62.1001	13.9683	-27.3854
6750	7.1099e+06	7.15201e+06	0.122993	-0.0844588	0.000865938	0.153157	-8.85704	14.0179	-32.6905	285.449	44.8776	8.16934	51.3213	124.448	30.2925	124.448	36.4001	12.1833	19.3651	1914.98	23.4789	-39.4092	62.8881	14.0179	-25.5996
6751	7.2099e+06	7.15201e+06	0.127595	-0.0864681	-0.00836891	0.160776	-8.62591	14.3869	-32.6709	277.062	46.3699	7.64818	54.162	123.563	27.8425	123.563	35.0578	12.0425	19.0488	1930.14	23.8234	-39.4393	63.2627	14.3869	-23.7222
6752	7.3099e+06	7.15201e+06	0.147117	-0.084942	-0.00880279	0.168912	-8.6377	14.645	-32.9245	277.443	49.509	7.20779	57.5103	126.88	26.2483	126.88	33.7383	11.6929	18.351	1949.46	24.2062	-39.5771	63.7833	14.645	-24.7131
6753	7.4099e+06	7.15201e+06	0.136693	-0.0788218	-0.0132368	0.173571	-8.99438	14.7572	-33.6518	282.305	50.6322	7.16296	58.9382	130.282	25.8697	130.282	33.2686	11.5473	17.9385	1984.44	24.2962	-40.1175	64.4137	14.7572	-27.0773
6754	7.5099e+06	7.15201e+06	0.136693	-0.0788218	-0.0132368	0.173571	-9.61202	14.5968	-34.735	286.497	49.0847	7.36732	58.9039	132.051	26.2077	132.051	32.996	11.8533	18.1451	2023.71	24.1269	-41.2128	65.3397	14.5968	-27.6021
6755	7.6099e+06	7.15201e+06	0.136693	-0.0788218	-0.0132368	0.173571	-10.0053	14.5058	-35.7054	287.162	47.1883	7.43524	59.6744	133.328	26.0438	133.328	31.5687	12.1906	18.3813	2059.35	23.997	-42.3131	66.3101	14.5058	-27.9514
6756	7.7099e+06	7.15201e+06	0.11751	-0.080328	-0.0122751	0.166927	-10.115	14.6221	-36.3148	291.275	47.6465	7.06593	62.0831	138.091	25.0669	138.091	29.3601	11.9795	17.9762	2090.15	23.7924	-42.8188	66.6112	14.6221	-29.0258
6757	7.8099e+06	7.15201e+06	0.11751	-0.080328	-0.0122751	0.166927	-10.4324	14.8205	-37.2866	299.764	49.9291	6.5386	65.397	144.788	23.1367	144.788	27.0984	11.8579	17.6131	2143.98	23.8586	-43.4743	67.3329	14.8205	-31.1088
6758	7.9099e+06	7.15201e+06	0.132546	-0.0822103	-0.0142735	0.151893	-10.856	14.975	-38.3742	297.104	51.0799	5.81503	68.4081	146.561	20.4672	146.561	25.1124	12.0552	17.6381	2201.42	24.114	-44.2487	68.3627	14.975	-32.4571
6759	8.0099e+06	7.15201e+06	0.132546	-0.0822103	-0.0142735	0.151893	-11.2074	15.1153	-39.4019	286.814	50.6854	5.21522	69.42	143.893	19.2654	143.893	23.3346	12.2203	17.5274	2250.53	24.4167	-45.3027	69.7194	15.1153	-33.1202
6760	8.1099e+06	7.15201e+06	0.155231	-0.0868683	0.00661252	0.168536	-11.5237	15.032	-40.0967	283.215	52.2027	5.06207	70.989	145.807	18.6734	145.807	22.1116	12.3242	17.4736	2277.5	24.4077	-46.1209	70.5286	15.032	-34.0254
6761	8.2099e+06	7.15201e+06	0.164516	-0.093708	0.0152468	0.163907	-11.5602	14.9791	-40.1134	284.918	56.2607	4.8611	75.2626	152.741	17.4011	152.741	20.6317	12.1746	17.298	2278.02	24.2639	-46.1408	70.4046	14.9791	-34.4127
6762	8.3099e+06	7.15201e+06	0.168013	-0.0804063	0.013363	0.163866	-11.6392	14.2778	-38.9771	306.631	64.4177	4.78853	79.8173	169.61	16.7901	169.61	18.981	12.0614	17.6151	2199.01	23.4469	-45.0706	68.5175	14.2778	-33.9894
6763	8.4099e+06	7.15201e+06	0.163753	-0.0798909	0.00547293	0.149667	-12.248	12.5448	-37.053	330.08	73.6666	4.87499	85.3887	189.32	16.5353	189.32	17.9368	11.7051	18.1406	2046.36	21.6782	-42.8632	64.5414	12.5448	-33.3592
6764	8.5099e+06	7.15201e+06	0.150055	-0.0767055	0.0105844	0.163372	-13.5298	10.5592	-36.4235	322.891	75.4708	4.89896	88.9909	191.178	16.5088	191.178	17.5383	11.3949	18.5295	1944.09	19.7751	-41.7696	61.5448	10.5592	-33.4297
6765	8.6099e+06	7.15201e+06	0.13616	-0.0630827	0.0360785	0.182169	-14.7162	9.84823	-37.9028	302.058	71.3232	4.94564	88.3508	180.141	17.3573	180.141	19.1125	11.8803	19.0391	1985.68	19.3923	-43.0875	62.4798	9.84823	-33.531
6766	8.7099e+06	7.15201e+06	0.108598	-0.0456664	0.028318	0.195156	-15.6214	9.74407	-39.6129	297.12	68.2768	5.31708	85.1441	174.329	19.4655	174.329	22.7046	12.6981	19.6929	2061.26	19.6821	-44.8913	64.5734	9.74407	-33.4375
6767	8.8099e+06	7.15201e+06	0.0999734	-0.0574434	0.0318345	0.179744	-15.5566	9.96277	-39.5569	306.81	67.6219	5.9024	80.7925	173.694	22.5922	173.694	27.0372	13.2748	20.3934	2070.88	20.0137	-45.1429	65.1566	9.96277	-32.0206
6768	8.9099e+06	7.15201e+06	0.115655	-0.0804904	0.0399937	0.176755	-14.7786	9.96486	-37.5695	322.03	69.8118	6.68685	78.8067	179.039	25.2288	179.039	31.2445	13.1432	20.84	1986.48	19.8072	-43.2422	63.0494	9.96466	-29.7209
6769	9.0099e+06	7.15201e+06	0.115655	-0.0804904	0.0399937	0.176755	-13.1569	10.7843	-35.1376	321.371	68.2757	7.09267	76.2824	174.582	26.8181	174.564	34.9201	12.083	19.8541	1913.05	20.1204	-40.5103	60.6308	10.7419	-25.678
6770	9.1099e+06	7.15201e+06	0.102005	-0.0692163	0.012649	0.167203	-11.518	11.7569	-32.7092	327.255	65.427	8.13834	69.0677	167.108	31.137	166.965	41.8838	10.4613	18.0039	1848.61	20.3956	-37.3876	57.7832	11.4773	-22.2148
6771	9.2099e+06	7.15201e+06	0.118293	-0.0766549	0.00499455	0.156182	-10.789	12.4084	-31.9718	335.516	61.954	9.49239	59.5028	157.927	36.4952	157.221	51.67	9.86915	17.2296	1845.92	20.7642	-36.256	57.0202	11.344	-18.9021
6772	9.3099e+06	7.15201e+06	0.129923	-0.0818267	0.00377571	0.152193	-10.8906	12.837	-33.0938	327.53	57.5204	9.48194	53.7454	146.18	37.1944	143.758	58.0471	10.5879	17.8343	1913.2	21.4851	-37.6746	59.1597	10.4707	-14.9838
6773	9.4099e+06	7.15201e+06	0.129923	-0.0818267	0.00377571	0.152193	-11.2658	12.3417	-33.3461	315.323	56.2902	9.25255	54.7009	141.974	35.3867	138.521	56.238	11.0941	18.6121	1909.95	21.1505	-38.3928	59.5433	10.351	-14.5635
6774	9.5099e+06	7.15201e+06	0.150126	-0.0803203	0.0033008	0.158575	-11.7017	10.9971	-32.3608	311.379	57.7851	9.52043	58.1645	144.22	34.785	142.229	50.848	10.9438	19.0672	1821.47	19.7081	-37.7111	57.4191	9.9364	-18.3842
6775	9.6099e+06	7.15201e+06	0.125419	-0.0852112	0.0185862	0.165138	-11.7604	9.52106	-30.6437	319.886	58.7649	10.333	59.2936	149.509	36.156	148.359	47.3225	10.3587	19.3647	1690.59	17.8344	-35.7161	53.5505	8.68841	-22.1168
6776	9.7099e+06	7.15201e+06	0.135311	-0.0766619	0.0127863	0.158272	-10.9016	8.71671	-27.8305	333.409	58.0582	11.6492	56.8973	153.129	38.708	151.192	49.2045	9.72498	19.861	1541.91	16.5963	-32.4124	49.0087	7.73666	-21.8166
6777	9.8099e+06	7.15201e+06	0.128777	-0.0657892	0.000738243	0.150761	-9.35864	9.11711	-24.8199	343.423	57.0366	12.701	52.2304	152.121	41.4913	148.53	54.8899	9.4446	20.4604	1441.53	16.7861	-29.3684	46.1546	8.1658	-20.01
6778	9.9099e+06	7.15201e+06	0.105316	-0.051456	-0.00808491	0.159489	-8.24387	10.0134	-23.3999	350.305	56.1684	13.7874	46.6323	147.959	44.9728	141.29	61.6033	9.59375	20.9131	1422.39	17.6528	-28.2204	45.8732	8.86243	-18.1857
6779	1.00099e+07	7.15201e+06	0.0802404	-0.0515253	-0.00765787	0.171876	-8.06363	10.5238	-23.7074	359.261	56.6333	14.9686	43.135	146.603	48.4811	137.86	67.7694	9.68804	20.7704	1448.18	18.1726	-28.5061	46.6786	9.02492	-15.9061
6780	1.01099e+07	7.15201e+06	0.065409	-0.0430342	-0.0128706	0.177507	-7.95598	11.1051	-24.3224	368.511	58.3341	15.4603	41.7555	147.751	50.6299	136.532	73.1423	9.57969	20.1687	1488.42	18.6323	-28.9293	47.5616	9.31402	-12.1111
6781	1.02099e+07	7.15201e+06	0.065409	-0.0430342	-0.0128706	0.177507	-7.77019	11.4189	-24.4195	385.184	60.9115	15.8061	41.0574	152.305	53.5622	138.794	77.4946	9.38808	19.712	1499.29	18.7559	-28.886	47.6418	9.49014	-10.7262
6782	1.03099e+07	7.15201e+06	0.0802404	-0.0515253	-0.00765787	0.171876	-7.90128	10.7162	-23.76	410.084	64.3282	17.0301	40.8662	160.889	58.7617	146.969	79.8101	9.35787	20.2097	1444.17	17.9931	-28.3227	46.3158	8.84163	-11.6759
6783	1.04099e+07	7.15201e+06	0.0964063	-0.0695055	-0.00423188	0.167264	-8.361	9.42479	-22.8745	432.026	67.5635	19.4752	40.7331	169.152	65.4998	156.763	80.1506	9.36407	21.0187	1361.29	16.8417	-27.6955	44.5372	7.6833	-14.7331
6784	1.05099e+07	7.15201e+06	0.074388	-0.0714561	-0.00287501	0.161461	-8.48535	8.61065	-22.1667	440.45	68.7695	21.1577	39.8049	170.245	68.9541	159.61	82.9688	9.0786	21.0358	1304.29	15.9777	-27.1298	43.1076	7.11385	-15.6761
6785	1.06099e+07	7.15201e+06	0.103556	-0.0802491	0.0118504	0.176335	-7.98397	8.16053	-20.9425	460.526	70.6747	22.5622	37.3605	171.633	73.3854	160.976	92.442	8.17804	20.0978	1238.71	14.8146	-25.7634	40.578	7.00043	-13.9278
6786	1.07099e+07	7.15201e+06	0.134466	-0.0958436	0.0294699	0.17697	-7.2346	7.79303	-19.5866	495.582	73.9046	24.5263	34.454	177.032	80.0081	163.422	103.529	7.08095	18.806	1167.23	13.5303	-24.0071	37.5374	6.26228	-10.7534
6787	1.08099e+07	7.15201e+06	0.12573	-0.0840027	0.0119833	0.167494	-6.32377	7.50531	-17.9474	531.019	78.2176	26.287	33.5027	187.685	85.3276	169.412	109.71	6.28757	18.1407	1085.99	12.6061	-22.0359	34.642	5.31029	-9.51933
6788	1.09099e+07	7.15201e+06	0.12573	-0.0840027	0.0119833	0.167494	-5.37505	7.71987	-16.6296	553.966	81.3384	27.2466	34.6553	198.97	87.9004	172.827	110.582	6.02656	18.1559	1034.75	12.6594	-20.5585	33.2178	4.81139	-7.37243
6789	1.10099e+07	7.15201e+06	0.089277	-0.0780917	0.0310521	0.190074	NA	NA	NA	NA	NA	NA	NA	NA	NA	NA	NA	NA	NA	NA	NA	NA	NA	NA	NA
6790	1.11099e+07	7.15201e+06	0.089277	-0.0780917	0.0310521	0.190074	NA	NA	NA	NA	NA	NA	NA	NA	NA	NA	NA	NA	NA	NA	NA	NA	NA	NA	NA
6935	-1.04901e+07	7.05201e+06	0.130769	-0.113618	0.0689813	0.166558	NA	NA	NA	NA	NA	NA	NA	NA	NA	NA	NA	NA	NA	NA	NA	NA	NA	NA	NA
6936	-1.03901e+07	7.05201e+06	0.139854	-0.0905447	0.0769668	0.158101	NA	NA	NA	NA	NA	NA	NA	NA	NA	NA	NA	NA	NA	NA	NA	NA	NA	NA	NA
6937	-1.02901e+07	7.05201e+06	0.155346	-0.0991921	0.0795176	0.151816	-1.17319	11.2585	-12.5374	541.166	114.523	17.4581	65.3643	265.912	60.3424	224.343	76.7465	7.08099	21.4785	988.939	15.996	-16.9293	32.9253	10.5034	-8.95604
6938	-1.01901e+07	7.05201e+06	0.155346	-0.0991921	0.0795176	0.151816	-1.24956	11.687	-13.1778	490.046	102.026	16.9842	63.5098	238.861	55.565	203.021	70.4347	7.97183	22.8001	1031.91	16.9467	-17.9316	34.8783	10.6986	-9.02515
6939	-1.00901e+07	7.05201e+06	0.146371	-0.0604463	0.0641895	0.175321	-1.42565	11.9373	-13.8903	474.042	95.6461	18.4261	60.0336	225.817	59.3642	194.198	70.8413	8.74648	23.8348	1071.65	17.6608	-18.9796	36.6403	10.7298	-9.19481
6940	-9.9901e+06	7.05201e+06	0.163119	-0.0636354	0.0375452	0.164759	-1.71347	12.1361	-14.9514	485.984	95.0973	20.7575	56.7929	227.078	67.0602	198.524	76.5483	9.16308	23.7336	1122.55	18.316	-20.284	38.6	10.7427	-8.69788
6941	-9.8901e+06	7.05201e+06	0.152533	-0.056397	0.0343605	0.16959	-1.77624	12.4831	-15.7702	497.766	96.4111	21.7407	56.3717	233.274	69.602	208.236	80.0002	9.44289	23.279	1168.35	19.0493	-21.5104	40.5597	10.9563	-7.48178
6942	-9.7901e+06	7.05201e+06	0.162826	-0.0683907	0.0364894	0.166737	-1.79682	12.4358	-15.6482	504.126	96.1463	21.6069	56.9407	236.845	68.6862	217.196	80.6232	9.53758	23.2787	1163.14	19.1655	-21.9357	41.1012	10.8281	-7.06607
6943	-9.6901e+06	7.05201e+06	0.162826	-0.0683907	0.0364894	0.166737	-2.50965	10.7942	-14.6723	535.753	95.8579	22.071	55.0504	243.313	72.6279	227.546	89.5525	9.30024	24.5595	1062.49	17.2465	-21.1123	38.3588	9.23236	-7.93094
6944	-9.5901e+06	7.05201e+06	0.151975	-0.0634605	0.0327605	0.172623	-2.80749	9.65197	-13.5417	575.236	96.3299	22.3535	51.7641	251.238	78.5936	226.438	105.194	9.31846	26.4264	973.731	15.9685	-19.7352	35.7037	7.8522	-7.01718
6945	-9.4901e+06	7.05201e+06	0.149447	-0.0619623	0.0260649	0.157841	-1.05834	11.2461	-11.8047	621.414	100.317	24.2774	48.2226	261.895	86.2071	215.596	122.169	9.80298	27.8162	964.645	17.6866	-17.7357	35.4222	7.94564	-3.91229
6946	-9.3901e+06	7.05201e+06	0.140687	-0.0696889	0.0267433	0.148147	-0.47332	11.3411	-10.9447	638.097	97.2206	26.1718	44.6758	260.969	90.1647	218.966	122.805	9.65791	28.4561	929.898	17.598	-16.3908	33.9888	8.20857	-3.24757
6947	-9.2901e+06	7.05201e+06	0.140687	-0.0696889	0.0267433	0.148147	-2.57433	8.4372	-11.7045	626.935	89.0163	26.1013	41.4837	248.232	91.5883	227.434	119.24	8.6681	28.0818	846.19	14.407	-16.4462	30.8531	7.06855	-4.8602
6948	-9.1901e+06	7.05201e+06	0.139298	-0.0565288	0.0183347	0.146217	-3.68416	8.43784	-14.321	555.283	78.757	21.209	41.8262	216.666	81.7825	208.404	109.287	9.50577	27.3274	946.948	15.0933	-19.6755	34.7688	7.77332	-5.67532
6949	-9.0901e+06	7.05201e+06	0.140738	-0.0690125	0.0241323	0.148333	-3.1912	10.41	-16.3451	531.176	75.2751	19.6582	44.4758	203.426	74.5492	194.573	110.058	11.1786	27.3298	1105.67	18.0395	-22.8502	40.8896	9.36458	-4.81271
6950	-8.9901e+06	7.05201e+06	0.150402	-0.0744796	0.0250557	0.144824	-5.37644	7.45852	-17.2298	617.359	91.8725	25.1166	45.777	243.432	91.1416	237.231	123.065	10.6163	27.6875	1028.38	14.7887	-23.6053	38.394	6.64199	-7.98295
6951	-8.8901e+06	7.05201e+06	0.150402	-0.0744796	0.0250557	0.144824	-7.11398	5.45882	-18.5019	613.943	101.996	25.8088	49.2098	263.439	89.6295	263.244	111.187	10.3067	27.6918	1003.12	12.4901	-24.7997	37.2898	5.42222	-12.662
6952	-8.7901e+06	7.05201e+06	0.134685	-0.0683862	0.0148663	0.137976	-5.48661	8.86386	-19.7319	495.88	91.9853	19.7534	57.4387	232.041	64.3385	232.041	72.852	11.6205	26.9786	1184.41	16.4214	-26.7368	43.1582	8.86386	-14.1737
6953	-8.6901e+06	7.05201e+06	0.151031	-0.0519732	0.00556047	0.128451	-4.80416	10.4162	-20.5944	352.237	73.3748	11.2505	68.7533	182.873	38.5602	182.871	43.1265	12.2773	26.5843	1276.86	18.2622	-28.0955	46.3577	10.4146	-13.9242
6954	-8.5901e+06	7.05201e+06	0.175284	-0.0500184	0.00390924	0.127026	-4.34823	10.7174	-20.0662	280.904	59.8318	7.32011	70.8621	149.403	27.7734	149.38	35.7208	12.3997	26.7174	1263.32	18.8058	-27.7241	46.5299	10.6956	-11.6035
6955	-8.4901e+06	7.05201e+06	0.204134	-0.0396892	-0.011758	0.134662	-3.70609	11.1697	-19.514	281.106	57.7142	6.20245	65.8629	140.293	26.9348	140.043	40.8839	12.5309	26.7064	1253.68	19.4988	-27.4879	46.9866	11.0078	-10.4226
6956	-8.3901e+06	7.05201e+06	0.179602	-0.0355721	-0.0143744	0.134574	-3.9572	10.5588	-18.9957	326.576	61.1056	8.4238	56.7985	147.787	36.0149	146.811	52.3762	12.2897	26.7906	1207.99	18.8372	-27.1222	45.9595	9.92914	-10.4172
6957	-8.2901e+06	7.05201e+06	0.187373	-0.0407367	-0.0148652	0.131923	-4.48816	10.013	-19.035	364.174	64.5349	11.871	51.6448	157.32	45.8754	156.433	60.4155	12.2943	27.2133	1193.51	18.1586	-27.0431	45.2016	9.47798	-10.9315
6958	-8.1901e+06	7.05201e+06	0.188588	-0.0522518	-0.00750779	0.133611	-4.76968	10.507	-20.3869	407.76	68.3954	16.4248	47.0482	169.253	56.0602	169.185	69.5019	12.6979	26.9318	1270.56	18.735	-28.4076	47.1426	10.4416	-11.5985
6959	-8.0901e+06	7.05201e+06	0.183391	-0.0487451	-0.00374171	0.148723	-5.6699	9.701	-20.9077	508.35	79.9272	23.6814	42.6817	204.192	75.7668	204.187	84.7977	11.993	25.867	1262.08	17.6822	-28.6575	46.3397	9.69285	-12.8898
6960	-7.9901e+06	7.05201e+06	0.18854	-0.0550664	0.0102994	0.148903	-6.26348	9.25468	-21.3167	558.345	88.3391	25.9562	43.9617	229.727	82.7818	229.724	90.3594	11.3612	24.7053	1266.08	17.0797	-28.9526	46.0322	9.24796	-13.6821
6961	-7.8901e+06	7.05201e+06	0.177521	-0.0453965	0.00962666	0.154056	-6.08003	10.2011	-22.2381	527.695	87.6496	22.4792	48.1229	228.238	74.0008	228.233	82.6308	11.3527	23.7202	1342.77	18.1479	-29.7868	47.9347	10.1917	-14.1668
6962	-7.7901e+06	7.05201e+06	0.164323	-0.0403028	0.00325243	0.132433	-5.69456	11.1085	-22.5482	487.341	85.7608	19.7946	53.083	222.271	65.3279	222.271	72.1786	11.4491	23.554	1391.69	19.1028	-29.5503	48.6532	11.1085	-15.6353
6963	-7.6901e+06	7.05201e+06	0.134454	-0.0326916	-0.0029436	0.130094	-4.22153	13.6678	-23.0506	425.457	75.9345	15.8418	55.6158	198.531	52.9487	198.531	59.3967	12.0396	23.2313	1511.11	21.949	-29.9066	51.8556	13.6678	-14.5019
6964	-7.5901e+06	7.05201e+06	0.104003	-0.0100912	-0.00953829	0.141303	-3.18894	14.8715	-22.372	387.318	66.8142	15.0051	53.2143	176.844	48.6825	176.844	54.5094	12.0596	22.9588	1530.39	23.2691	-29.2896	52.5586	14.8715	-12.0039
6965	-7.4901e+06	7.05201e+06	0.103587	-0.014474	0.0238953	0.168758	-3.33236	14.5036	-21.8724	357.625	58.4042	15.9329	46.1477	153.907	50.5784	153.778	55.103	11.9671	23.091	1496.8	22.9901	-28.8552	51.8453	14.3981	-12.4302
6966	-7.3901e+06	7.05201e+06	0.12173	-0.0241229	0.0298339	0.175311	-3.62403	14.2366	-22.0764	323.27	48.7604	15.3725	39.0055	128.382	50.0292	126.589	54.4793	11.6638	22.5916	1494.15	22.6288	-29.0058	51.6346	13.356	-13.284
6967	-7.2901e+06	7.05201e+06	0.138411	-0.0327185	0.0326327	0.167774	-3.64602	14.1986	-22.3307	301.829	43.1326	12.48	39.595	117.586	43.6942	111.713	50.6619	10.9579	21.4121	1500.07	22.0755	-29.0654	51.1409	12.5231	-13.4778
6968	-7.1901e+06	7.05201e+06	0.111174	-0.0489486	0.0228668	0.144187	-3.90844	13.6623	-22.6007	298.052	42.4227	9.86797	43.4543	116.728	38.4215	108.185	47.8123	9.8293	19.6982	1486.13	20.7913	-29.0249	49.8162	11.3789	-14.1262
6969	-7.0901e+06	7.05201e+06	0.111461	-0.0548555	0.0212601	0.141509	-4.18213	13.3924	-22.85	294.675	42.637	8.73253	46.0544	117.17	34.5701	110.659	46.8958	8.69046	17.678	1481.89	19.9971	-29.0803	49.0774	11.6631	-14.5499
6970	-6.9901e+06	7.05201e+06	0.152244	-0.0481237	0.0211117	0.149114	-4.95031	13.5526	-24.0689	300.005	45.7699	9.79894	48.1402	123.506	33.9724	121.262	47.2418	8.74397	17.2147	1534.81	20.2929	-30.4464	50.7393	12.2904	-15.7678
6971	-6.8901e+06	7.05201e+06	0.145745	-0.0628285	0.0275181	0.153476	-5.92963	13.1329	-25.3252	313.367	50.3232	11.1691	49.7177	132.361	37.2024	130.606	45.6299	9.16017	17.5856	1571.63	20.1042	-31.9383	52.0424	11.4986	-19.196
6972	-6.7901e+06	7.05201e+06	0.131183	-0.0616892	0.04177	0.14817	-6.85324	12.9321	-26.7417	324.37	53.5272	11.5713	51.0089	139.552	39.4813	135.48	42.2695	9.5998	17.8357	1623.2	20.2531	-33.5461	53.7993	10.9886	-24.0024
6973	-6.6901e+06	7.05201e+06	0.155086	-0.0632957	0.0403416	0.148253	-7.50574	12.5974	-27.3991	331	54.961	11.0028	52.7543	145.099	38.6015	138.424	39.2513	9.84159	18.0668	1636.93	20.2552	-34.2238	54.479	10.6681	-26.5138
6974	-6.5901e+06	7.05201e+06	0.178462	-0.0611874	0.0406858	0.153137	-7.77706	12.1055	-26.989	333.926	53.9987	10.1589	53.3624	147.354	36.9535	139.016	36.9879	9.82639	18.3048	1599.55	20.0644	-33.6257	53.6901	10.3304	-26.7962
6975	-6.4901e+06	7.05201e+06	0.186233	-0.0388473	0.0341071	0.17269	-8.05224	11.7648	-26.8822	328.326	52.8192	8.54882	55.9985	147.795	33.6093	136.638	33.6473	9.63735	18.1338	1578.3	19.9563	-33.1856	53.1419	10.0447	-26.468
6976	-6.3901e+06	7.05201e+06	0.173431	-0.0283281	0.0298037	0.179336	-8.50855	11.2497	-27.2163	314.875	52.6297	6.70399	60.0438	145.972	29.3859	131.974	29.5539	9.25872	17.5791	1573.25	19.4381	-33.2291	52.6671	9.72915	-26.3558
6977	-6.2901e+06	7.05201e+06	0.168784	-0.0194945	0.0415997	0.18885	-9.0832	10.6021	-27.7676	307.496	52.8592	6.06249	62.6917	146.482	27.4862	130.333	27.6967	8.99171	17.186	1573.77	18.7131	-33.6061	52.3192	9.33116	-26.7831
6978	-6.1901e+06	7.05201e+06	0.144523	-0.0523863	0.0649037	0.181642	-9.51164	10.0816	-28.2039	308.533	52.2734	6.73178	62.4297	147.938	28.5678	131.519	28.8283	8.81983	16.9571	1574.93	18.0989	-33.9124	52.0113	9.05424	-27.2323
6979	-6.0901e+06	7.05201e+06	0.161465	-0.048794	0.0732639	0.205859	-9.62697	9.91994	-28.3329	308.45	52.0705	7.49984	61.7062	148.487	29.7036	131.692	30.7889	8.58113	16.573	1577.5	17.8193	-33.9569	51.7762	9.06736	-27.4433
6980	-5.9901e+06	7.05201e+06	0.150792	-0.0767754	0.0623698	0.220319	-9.62623	9.78908	-28.2242	300.977	53.5501	7.79079	61.033	144.99	29.9251	128.25	32.6435	8.10293	15.8424	1572.16	17.36	-33.7809	51.1409	9.12014	-27.522
6981	-5.8901e+06	7.05201e+06	0.150792	-0.0767754	0.0623698	0.220319	-9.64626	9.37157	-27.9309	297.846	55.3203	8.01391	60.0097	142.231	31.268	124.314	35.0296	7.55864	15.8911	1547.97	16.4439	-33.4804	49.9243	8.88385	-27.4671
6982	-5.7901e+06	7.05201e+06	0.150792	-0.0767754	0.0623698	0.220319	-8.63283	7.85278	-24.5964	316.304	57.856	9.24766	56.3948	145.639	36.2048	119.877	39.6289	6.42225	23.5631	1350.12	13.7657	-29.6429	43.4085	7.53514	-24.3694
6983	-5.6901e+06	7.05201e+06	0.150792	-0.0767754	0.0623698	0.220319	NA	NA	NA	NA	NA	NA	NA	NA	NA	NA	NA	NA	NA	NA	NA	NA	NA	NA	NA
6994	-4.5901e+06	7.05201e+06	0.179078	-0.0520295	0.0983255	0.264518	-7.9268	6.81146	-22.8789	420.362	57.2753	18.6917	39.7694	160.293	59.1758	143.117	59.4362	4.18908	10.961	1219.05	12.0804	-26.1351	38.2156	6.0075	-22.2555
6995	-4.4901e+06	7.05201e+06	0.179078	-0.0520295	0.0983255	0.264518	-6.87891	6.73881	-21.179	381.499	53.0648	17.0467	39.8578	146.285	53.2773	138.229	53.3904	3.89437	10.983	1145.84	11.3817	-24.2022	35.584	6.63561	-20.8473
7043	309904	7.05201e+06	-0.0391485	-0.0542135	0.0312699	0.155022	5.6118	11.6969	0.318489	2639.3	314.397	111.492	34.8135	915.377	376.947	485.221	798.837	3.92671	23.9451	474.591	14.7725	-1.60826	16.3807	4.29129	7.22944
7044	409904	7.05201e+06	-0.00907118	-0.0560536	0.0306638	0.153044	2.832	9.76931	-3.07274	2064.97	249.891	81.2728	34.3616	706.956	289.907	375.757	651.162	4.55538	24.4834	531.029	13.3075	-5.30746	18.615	-0.4771	4.94356
7045	509904	7.05201e+06	0.00387698	-0.0560898	0.0125214	0.146365	-0.432345	7.73084	-7.30031	1145.29	132.366	45.3102	29.1865	372.657	172.617	269.351	334.053	6.01912	26.4487	619.943	12.2614	-10.4	22.6615	-1.79795	-0.113281
7046	609904	7.05201e+06	-0.0103314	-0.066471	0.0171571	0.134998	0.0857735	9.40947	-7.98898	671.366	87.3773	29.1118	35.7751	242.276	100.144	238.221	129.97	7.28466	27.3292	714.366	15.1623	-11.4949	26.6572	8.72614	-4.42642
7047	709904	7.05201e+06	0.00402201	-0.0635108	0.0101822	0.119702	0.443158	10.7301	-9.1627	665.162	87.8375	29.6835	36.0066	244.036	98.8223	243.603	115.029	8.83591	28.2899	807.473	17.351	-13.816	31.167	10.6111	-5.16339
7048	809904	7.05201e+06	0.0415485	-0.0631751	0.0168949	0.144073	0.553338	11.2891	-9.69904	702.843	89.9266	31.259	33.6971	251.173	108.521	250.52	120.067	10.0473	29.9086	849.483	18.3939	-15.1855	33.5794	11.026	-7.02521
7049	909904	7.05201e+06	0.0445616	-0.0650049	0.0248903	0.166731	2.28464	12.7903	-7.65189	661.285	89.4131	27.7823	35.1377	241.893	99.7884	241.478	107.597	9.06616	28.4349	827.278	19.5923	-12.2257	31.818	12.5578	-6.43485
7050	1.0099e+06	7.05201e+06	-0.0471228	-0.0588543	0.0181758	0.138618	3.35411	13.7375	-6.38317	651.143	85.3825	29.2208	31.6199	229.273	106.286	225.352	116.868	8.78554	28.1846	812.202	20.254	-10.9018	31.1558	13.0942	-4.78725
7051	1.1099e+06	7.05201e+06	-0.0486418	-0.0703979	0.0130199	0.12931	NA	NA	NA	NA	NA	NA	NA	NA	NA	NA	NA	NA	NA	NA	NA	NA	NA	NA	NA
7053	1.3099e+06	7.05201e+06	-0.0318738	-0.0488966	0.00461218	0.143209	NA	NA	NA	NA	NA	NA	NA	NA	NA	NA	NA	NA	NA	NA	NA	NA	NA	NA	NA
7054	1.4099e+06	7.05201e+06	-0.00459013	-0.0567955	0.000662169	0.120426	3.77511	14.4788	-6.08298	627.443	78.7813	30.8655	31.4285	220.227	102.254	211.53	124.538	8.19414	25.646	833.759	21.0156	-10.8816	31.8971	12.876	-2.06724
7055	1.5099e+06	7.05201e+06	-0.0163765	-0.0523821	0.00148766	0.122614	3.43533	14.5801	-6.9727	623.341	82.8679	29.6467	33.2607	225.179	99.9843	220.407	118.124	8.30704	25.1646	870.589	21.235	-11.7767	33.0117	12.7934	-3.14119
7056	1.6099e+06	7.05201e+06	-0.0499586	-0.0432033	-0.00163077	0.123917	3.40757	14.8393	-7.36665	618.509	84.1733	29.6614	34.1075	224.833	98.9661	220.793	117.53	7.78672	23.4902	895.586	21.1638	-11.981	33.1448	13.317	-3.305
7057	1.7099e+06	7.05201e+06	-0.0270663	-0.0388278	-0.00266301	0.132613	3.36071	15.0707	-7.74826	616.389	80.9078	30.8861	31.6909	216.016	100.147	212.746	121.641	7.4954	22.4679	918.86	21.2732	-12.0841	33.3573	13.8212	-3.06567
7058	1.8099e+06	7.05201e+06	-0.0141286	-0.043911	-0.00344665	0.130011	3.38037	15.3302	-8.06539	615.829	80.3979	31.5669	31.2396	212.269	99.3106	207.428	126.015	7.43424	21.8829	942.271	21.4808	-12.466	33.9468	13.725	-2.42436
7059	1.9099e+06	7.05201e+06	0.0110841	-0.0568356	-0.0146812	0.12021	3.02312	14.7438	-8.19934	634.165	82.1016	32.0909	31.6799	219.363	100.575	211.305	128.566	7.66918	22.6244	925.521	21.1227	-12.7675	33.8902	13.1655	-3.15357
7060	2.0099e+06	7.05201e+06	0.00942738	-0.0598749	-0.0184968	0.118587	2.46241	14.3839	-9.12319	638.88	83.7253	29.7353	33.3304	225.156	99.3482	215.688	119.597	7.5319	21.7361	948.856	20.7081	-13.9721	34.6803	12.7176	-4.51876
7061	2.1099e+06	7.05201e+06	0.0116678	-0.0580752	-0.0219272	0.122442	2.25494	14.3567	-9.7193	633.037	83.3975	28.4656	33.0923	224.158	99.1256	217.497	115.867	7.61246	21.5441	968.365	20.7087	-14.6284	35.3371	12.5569	-4.5113
7062	2.2099e+06	7.05201e+06	0.0082287	-0.0441586	-0.0157693	0.134693	2.56322	14.5789	-9.26328	633.268	80.9292	29.3507	31.9919	220.957	98.1074	209.646	119.379	7.97943	22.4311	957.707	21.2802	-14.2786	35.5588	10.7756	-4.44656
7063	2.3099e+06	7.05201e+06	0.0200266	-0.0427417	-0.017551	0.135661	2.14728	14.6249	-10.142	636.039	80.1155	28.518	31.7404	220.441	96.993	208.516	116.295	8.34981	22.4687	996.075	21.755	-15.4046	37.1596	9.01067	-6.60135
7064	2.4099e+06	7.05201e+06	0.0135122	-0.0435861	-0.0149556	0.143546	1.77279	14.4823	-10.7859	619.519	80.1659	27.6825	32.2506	215.728	93.759	214.394	107.779	8.10928	21.6143	1015.18	21.4709	-16.0445	37.5154	13.0757	-9.0035
7065	2.5099e+06	7.05201e+06	0.0264893	-0.050175	-0.0108433	0.14011	1.53959	14.4847	-11.3501	647.651	79.6032	30.8938	29.4977	219.188	101.782	219.188	121.223	8.02573	21.1059	1035.04	21.4538	-16.5714	38.0252	14.4847	-7.65972
7066	2.6099e+06	7.05201e+06	0.0168192	-0.0475952	-0.0235122	0.13414	1.56007	14.6423	-11.4235	611.813	77.0265	28.5383	31.4412	216.553	94.738	216.553	111.045	7.93867	20.8232	1043.92	21.5786	-16.5499	38.1285	14.6423	-8.93937
7067	2.7099e+06	7.05201e+06	0.0306889	-0.0454079	-0.0246477	0.138999	1.60516	14.878	-11.5623	582.354	75.5419	26.0836	33.8645	214.37	87.8158	214.37	103.495	8.11551	20.9418	1059.75	21.911	-16.841	38.7521	14.878	-8.85049
7068	2.8099e+06	7.05201e+06	0.0231956	-0.0492151	-0.0219859	0.140039	1.24013	14.6126	-12.0358	587.292	73.5685	25.0525	33.4174	211.024	86.5719	211.024	104.015	8.36999	21.2282	1067.5	21.7961	-17.6228	39.4189	14.6126	-9.09079
7069	2.9099e+06	7.05201e+06	0.017119	-0.0501889	-0.0196507	0.147617	0.960251	14.5467	-12.5787	577.321	73.8568	23.0751	34.8868	208.864	83.6351	208.864	96.4352	8.57908	21.3926	1086.39	22.0174	-18.0825	40.0999	14.5467	-9.57472
7070	3.0099e+06	7.05201e+06	0.0194331	-0.0571943	-0.0204682	0.145697	0.831256	14.5375	-12.9934	585.335	72.3773	25.1067	32.5459	205.621	85.8488	205.621	104.866	8.46593	21.1166	1102.18	21.8998	-18.1895	40.0893	14.5375	-6.58784
7071	3.1099e+06	7.05201e+06	0.0194331	-0.0571943	-0.0204682	0.145697	0.7044	14.5754	-13.2741	577.648	71.4632	26.1157	32.3019	202.02	85.1726	202.02	106.629	8.17852	20.3737	1115.15	21.8213	-18.3286	40.1498	14.5754	-5.59059
7072	3.2099e+06	7.05201e+06	0.00625441	-0.0508059	-0.0248555	0.149293	0.31166	14.2768	-13.8762	584.749	71.8824	27.2412	31.9271	205.045	87.4615	205.045	109.402	8.54497	20.7339	1128.61	21.7978	-19.4101	41.2079	14.2768	-6.05473
7073	3.3099e+06	7.05201e+06	0.00669138	-0.0439645	-0.0222718	0.164744	-0.00296077	14.0031	-14.2971	611.158	71.2521	29.3166	29.3628	206.625	93.8103	206.625	119.43	8.70121	20.995	1135.62	21.5926	-19.857	41.4496	14.0031	-6.39622
7074	3.4099e+06	7.05201e+06	0.00628451	-0.0399795	-0.0177206	0.180893	-0.0924254	14.2215	-14.5466	631.573	72.7324	30.4868	28.1871	209.313	97.7752	209.31	124.975	8.62411	20.6861	1156.43	21.7632	-19.9234	41.6866	14.2156	-6.47373
7075	3.5099e+06	7.05201e+06	-0.0309066	-0.0464128	-0.0146905	0.165453	-0.513816	14.2472	-15.3464	671.971	78.6666	31.5737	28.24	221.976	104.024	221.128	130.69	9.17245	21.3317	1189.7	22.1951	-20.762	42.9571	13.7733	-7.21348
7076	3.6099e+06	7.05201e+06	-0.0184287	-0.0521293	-0.0110862	0.161901	-1.27744	13.8034	-16.3724	704.644	85.6696	32.3527	30.5514	240.395	108.438	235.635	127.563	10.0446	21.2709	1218.49	23.2687	-23.9653	47.234	12.3369	-10.2987
7077	3.7099e+06	7.05201e+06	-0.00414641	-0.0531406	-0.0155645	0.153988	-1.97243	13.2335	-17.2029	658.232	88.9386	27.1613	37.5476	244.358	93.6546	241.556	103.554	10.144	21.3384	1226.06	22.4243	-25.1202	47.5445	12.1531	-14.2021
7078	3.8099e+06	7.05201e+06	-0.0111503	-0.0397833	-0.0143428	0.170094	-1.4944	14.3004	-17.9777	556.065	83.645	20.4339	45.1159	224.666	70.7634	224.593	78.2397	10.4676	21.8855	1295.12	22.6977	-25.1308	47.8285	14.2359	-14.9196
7079	3.9099e+06	7.05201e+06	0.0102947	-0.0423983	-0.0212374	0.17053	-1.58925	14.5482	-18.4587	534.491	81.8252	19.0487	47.4048	222.32	65.6419	222.32	73.0859	10.1735	21.2607	1329.05	22.663	-25.1919	47.8549	14.5482	-15.7056
7080	4.0099e+06	7.05201e+06	0.0102947	-0.0423983	-0.0212374	0.17053	-1.64508	14.6075	-18.366	549.452	81.5848	20.2832	45.7069	225.02	69.7388	225.02	78.3738	9.63283	20.4081	1329.19	22.5332	-24.661	47.1942	14.6075	-15.6492
7081	4.1099e+06	7.05201e+06	0.0247706	-0.0399376	-0.0223727	0.176706	-1.58457	14.7279	-18.2211	570.033	83.4425	21.6224	43.526	227.768	74.576	227.768	85.2818	9.27351	19.8433	1319.7	22.5564	-24.1823	46.7388	14.7279	-14.4159
7082	4.2099e+06	7.05201e+06	0.0247706	-0.0399376	-0.0223727	0.176706	-1.82041	14.8877	-18.8084	561.23	81.1007	21.2268	43.1492	222.654	72.9714	222.654	85.5761	9.21185	19.3411	1349.03	22.5999	-25.0285	47.6285	14.8877	-13.4701
7083	4.3099e+06	7.05201e+06	0.0247706	-0.0399376	-0.0223727	0.176706	-2.15938	14.7899	-19.2939	549.204	78.1621	20.7424	43.3781	218.551	69.8712	218.551	84.3197	9.33723	19.3621	1363.87	22.5173	-25.6961	48.2134	14.7899	-10.8191
7084	4.4099e+06	7.05201e+06	0.0400979	-0.037332	-0.0235748	0.183246	-2.464	14.7619	-19.7456	540.857	76.7507	20.6371	43.4347	215.839	68.2249	215.839	83.173	9.5349	19.5433	1379.67	22.7292	-26.0482	48.7773	14.7619	-11.0207
7085	4.5099e+06	7.05201e+06	0.0557394	-0.0348202	-0.02523	0.188302	-2.60947	14.9177	-19.8503	537.383	77.007	20.6239	43.6363	214.837	67.0955	214.837	82.8141	9.43564	19.4097	1391.84	22.8882	-25.7217	48.6099	14.9177	-11.5362
7086	4.6099e+06	7.05201e+06	0.0559142	-0.048715	-0.0326604	0.178076	-2.73643	14.9478	-20.2324	543.064	78.9334	21.0379	43.5101	216.971	68.1399	216.971	84.1959	9.39044	19.169	1406.93	22.78	-26.2109	48.9909	14.9478	-11.9084
7087	4.7099e+06	7.05201e+06	0.0488255	-0.0431036	-0.026304	0.184788	-2.92942	14.8705	-20.6605	546.779	81.0861	20.9183	43.6096	218.927	69.9219	218.927	83.5103	8.94162	18.3331	1421.27	22.4176	-26.3562	48.7738	14.8705	-14.437
7088	4.8099e+06	7.05201e+06	0.0488255	-0.0431036	-0.026304	0.184788	-3.34094	14.457	-20.8902	534.354	80.9135	19.3653	45.8306	218.919	66.0043	218.919	76.6804	9.06214	18.589	1420	22.0921	-26.6609	48.753	14.457	-18.1511
7089	4.9099e+06	7.05201e+06	0.0529592	-0.0508184	-0.0141739	0.192628	-3.55702	14.3779	-20.9405	527.442	78.8436	18.549	46.6052	218.07	63.5275	218.07	73.5839	9.55765	19.3469	1423.12	22.2722	-27.1387	49.4109	14.3779	-18.8346
7090	5.0099e+06	7.05201e+06	0.0352393	-0.0533251	-0.01312	0.184942	-3.61923	14.6895	-21.2102	541.552	79.6964	20.2504	43.9883	217.634	68.8241	217.633	80.1195	9.87487	19.5396	1445.48	22.9652	-27.5737	50.5389	14.6887	-18.8911
7091	5.1099e+06	7.05201e+06	0.0352393	-0.0533251	-0.01312	0.184942	-3.85731	14.6518	-21.6937	566.626	80.0887	22.3339	40.59	217.067	75.9927	216.973	88.6289	10.454	20.2213	1461.67	23.528	-28.1412	51.6692	14.5234	-18.8925
7092	5.2099e+06	7.05201e+06	0.0173176	-0.0531772	0.000149992	0.183984	-4.21143	14.4069	-22.2892	587.843	77.5529	24.4184	37.2112	215.269	82.4593	214.641	96.6683	11.0616	21.0205	1475.39	23.7999	-28.8223	52.6222	13.6055	-17.3579
7093	5.3099e+06	7.05201e+06	0.00126522	-0.0555318	0.000723366	0.176808	-4.34773	14.2161	-22.5821	595.917	75.7928	25.1397	35.1613	212.307	84.958	210.091	101.166	11.0743	20.9939	1480.01	23.6371	-29.1202	52.7572	12.1411	-17.5657
7094	5.4099e+06	7.05201e+06	0.0131173	-0.0549843	-0.0068816	0.165508	-4.2514	14.2728	-22.4446	598.867	74.6564	24.9213	33.8727	208.388	85.2618	204.42	104.354	10.5118	20.1566	1478.04	23.3909	-28.7507	52.1415	10.9842	-16.7715
7095	5.5099e+06	7.05201e+06	0.0264764	-0.0614358	-0.00288253	0.161346	-4.10097	14.4623	-22.2825	601.414	74.1733	24.4706	33.4289	206.692	84.1795	202.054	106.882	10.0391	19.3785	1479.55	23.3683	-28.4304	51.7987	11.3332	-13.6808
7096	5.6099e+06	7.05201e+06	0.0206186	-0.0597752	-0.0132481	0.159922	-4.42573	14.3005	-22.972	600.921	73.8208	24.1137	33.3644	206.243	83.3951	202.161	107.196	10.4459	19.7075	1499.93	23.5915	-29.364	52.9555	11.7475	-14.1215
7097	5.7099e+06	7.05201e+06	0.0198428	-0.0723591	-0.0127283	0.133589	-5.23732	13.5958	-24.2566	583.469	74.1205	22.6821	34.96	205.034	78.8772	203.22	102.177	11.2551	20.7061	1522.19	23.524	-30.7889	54.3128	12.3383	-14.9261
7098	5.8099e+06	7.05201e+06	0.0306128	-0.0740022	0.00433932	0.149554	-6.13986	12.8531	-25.5641	562.479	76.269	21.2423	37.2473	204.531	74.288	204.461	94.7498	11.7422	21.3334	1544.32	23.0398	-32.0133	55.0531	12.7679	-18.107
7099	5.9099e+06	7.05201e+06	0.0528746	-0.0716778	0.00555766	0.146421	-6.88914	12.5377	-27.0026	545.125	79.4385	19.9784	39.2947	202.174	70.6013	202.066	87.8254	11.5793	20.7464	1589.55	22.489	-33.3764	55.8654	12.3338	-22.0018
7100	6.0099e+06	7.05201e+06	0.0447402	-0.0654039	0.0087676	0.152445	-7.34848	12.6664	-28.2442	519.198	80.5225	18.3041	41.7226	196.463	65.3413	195.524	79.7308	11.4143	19.9628	1646.73	22.4323	-34.768	57.2003	11.5351	-24.1039
7101	6.1099e+06	7.05201e+06	0.061881	-0.0792386	0.0242644	0.173863	-7.40424	13.2252	-29.2756	467.379	74.7664	15.7341	44.3773	183.345	56.3788	182.22	68.9598	11.8816	20.1188	1711.04	23.1617	-35.9022	59.0639	12.2273	-25.1828
7102	6.2099e+06	7.05201e+06	0.0422618	-0.0746665	0.028414	0.187764	-7.20013	13.777	-29.5073	421.777	68.208	13.3207	47.2159	172.765	47.99	172.552	59.0658	12.1334	20.0569	1742.29	23.8729	-36.6368	60.5098	13.5463	-25.5222
7103	6.3099e+06	7.05201e+06	0.052139	-0.0708193	0.0268112	0.188073	-7.11427	13.9045	-29.225	390.982	64.677	11.465	50.179	166.719	41.8644	166.717	51.7114	12.3674	20.257	1738.78	24.0602	-37.0086	61.0688	13.9002	-25.363
7104	6.4099e+06	7.05201e+06	0.0710527	-0.0688294	0.0270979	0.196132	-7.69481	13.2818	-29.4496	372.604	63.1485	10.2481	52.5915	163.732	38.0474	163.732	46.5986	13.1024	21.4741	1729.97	23.6122	-37.404	61.0162	13.2818	-25.6593
7105	6.5099e+06	7.05201e+06	0.0710527	-0.0688294	0.0270979	0.196132	-8.17764	12.9652	-30.134	364.988	61.6866	9.83887	53.1075	161.875	36.7768	161.875	44.3754	13.7742	22.2354	1748.52	23.513	-38.4452	61.9582	12.9652	-26.3076
7106	6.6099e+06	7.05201e+06	0.0798939	-0.0728524	0.0183216	0.165008	-8.10725	13.2484	-30.3239	360.133	59.0702	10.0227	51.4568	156.936	37.1058	156.936	43.8317	13.8846	22.2097	1769.23	23.7294	-38.8009	62.5303	13.2484	-26.4969
7107	6.7099e+06	7.05201e+06	0.113222	-0.0770571	0.0160783	0.165427	-7.68839	13.7673	-29.8571	353.384	55.8616	10.2753	49.5819	150.445	37.5344	150.445	43.833	13.3983	21.5562	1774.34	23.9151	-38.2329	62.148	13.7673	-26.0822
7108	6.8099e+06	7.05201e+06	0.113222	-0.0770571	0.0160783	0.165427	-7.27002	14.1888	-29.2875	348.946	53.8174	10.4206	48.9943	147.652	37.6553	147.652	44.1552	12.3578	20.3319	1769.85	23.7482	-36.9754	60.7235	14.1888	-25.5259
7109	6.9099e+06	7.05201e+06	0.119887	-0.0835699	0.0123037	0.158368	-7.0182	14.4247	-28.877	349.88	53.9096	10.4346	49.8369	150.366	37.839	150.366	44.7742	11.1028	18.7915	1762.21	23.3791	-35.6309	59.01	14.4247	-25.0694
7110	7.0099e+06	7.05201e+06	0.0987331	-0.0865229	-0.000164416	0.146544	-6.95825	14.467	-28.6363	349.315	54.1601	10.5432	49.9403	150.704	38.5562	150.704	46.1984	10.3987	17.9422	1755.14	23.1373	-34.7855	57.9228	14.467	-23.7237
7111	7.1099e+06	7.05201e+06	0.117778	-0.0910912	0.00685535	0.157144	-7.07333	14.3942	-28.9746	337.663	53.1201	10.3406	50.6919	146.864	36.9317	146.864	46.1935	10.7784	18.4752	1767.42	23.3124	-34.9728	58.2852	14.3942	-19.1549
7112	7.2099e+06	7.05201e+06	0.120634	-0.0928034	-0.00334474	0.152851	-7.46889	14.2033	-29.9479	323.133	52.1611	9.44354	53.2549	143.888	33.2604	143.888	43.1325	11.6447	19.555	1803.4	23.4943	-36.0229	59.5173	14.2033	-18.7693
7113	7.3099e+06	7.05201e+06	0.120634	-0.0928034	-0.00334474	0.152851	-7.5683	14.4327	-30.534	306.223	52.5293	8.26149	56.7778	140.814	30.118	140.814	38.7369	12.1856	20.0435	1840.04	23.753	-37.04	60.793	14.4327	-20.4629
7114	7.4099e+06	7.05201e+06	0.128191	-0.0862239	-0.00799983	0.162601	-7.86661	14.3105	-30.9947	296.581	54.4708	7.70165	59.7173	139.866	28.5552	139.866	35.9527	12.5566	20.2993	1853.94	23.8296	-38.0452	61.8748	14.3105	-22.76
7115	7.5099e+06	7.05201e+06	0.128191	-0.0862239	-0.00799983	0.162601	-8.24128	14.2312	-31.6412	296.633	55.1139	7.87253	60.2655	140.252	28.2401	140.252	35.9282	12.388	19.8326	1878.31	23.8512	-38.6558	62.5069	14.2312	-22.7048
7116	7.6099e+06	7.05201e+06	0.128191	-0.0862239	-0.00799983	0.162601	-8.6668	14.3277	-32.7016	304.12	54.2433	8.18634	59.3914	142.477	29.3696	142.477	36.5198	12.1703	19.2215	1925.97	23.8954	-39.4276	63.323	14.3277	-25.8722
7117	7.7099e+06	7.05201e+06	0.0991678	-0.0828818	-0.00645553	0.160419	-9.27625	14.1204	-33.9332	309.132	52.7372	8.24866	59.9384	145.477	29.5018	145.477	35.5483	12.822	19.7583	1967.59	23.9374	-40.8908	64.8282	14.1204	-27.7843
7118	7.8099e+06	7.05201e+06	0.110287	-0.0866937	-0.0020323	0.155555	-9.60609	14.1194	-34.8589	304.696	51.3075	7.71906	63.3108	147.754	27.4856	147.754	33.0064	13.1488	19.966	2005.81	23.9109	-41.9235	65.8344	14.1194	-27.7344
7119	7.9099e+06	7.05201e+06	0.120847	-0.0910121	-0.00292052	0.152026	-9.81923	14.4427	-35.7626	297.843	50.5436	6.76317	67.0328	148.662	24.4001	148.662	30.0928	12.65	19.1428	2059.4	23.8156	-42.2931	66.1088	14.4427	-28.2923
7120	8.0099e+06	7.05201e+06	0.115549	-0.0834621	-0.0133877	0.146554	-10.102	14.8436	-36.831	285.941	49.0691	5.99167	68.521	144.042	22.0021	144.042	27.8872	12.5982	18.7467	2125.37	24.1938	-43.051	67.2447	14.8436	-28.8909
7121	8.1099e+06	7.05201e+06	0.115549	-0.0834621	-0.0133877	0.146554	-10.2825	15.3412	-37.9135	272.977	47.0786	5.5893	67.8579	136.566	20.545	136.566	26.8324	12.6934	18.4272	2194.3	24.8185	-44.1038	68.9223	15.3412	-28.1707
7122	8.2099e+06	7.05201e+06	0.148454	-0.0787739	-0.00505865	0.162095	-10.6669	15.3264	-38.7556	281.314	48.865	5.64163	67.2849	140.045	20.942	140.045	25.5855	12.9369	18.5319	2232.78	24.8925	-44.9507	69.8433	15.3264	-31.9348
7123	8.3099e+06	7.05201e+06	0.127384	-0.0673554	-0.00847098	0.170715	-10.7987	15.3466	-39.2208	292.536	52.266	5.54085	67.6294	146.157	21.1441	146.157	24.2862	12.7666	18.2076	2254.61	24.7616	-45.3986	70.1603	15.3466	-33.4205
7124	8.4099e+06	7.05201e+06	0.14999	-0.0822764	0.0150771	0.174979	-10.904	15.1644	-39.3011	301.087	57.1832	5.26091	71.7531	155.337	19.6888	155.337	22.4527	12.5504	17.9121	2247.74	24.4577	-45.6216	70.0793	15.1644	-33.5885
7125	8.5099e+06	7.05201e+06	0.160011	-0.0882918	0.0186531	0.170277	-11.4107	14.039	-38.4235	326.668	66.5107	5.1371	77.8445	175.946	18.414	175.946	20.9136	12.321	18.1108	2161	23.329	-44.7291	68.0581	14.039	-33.3725
7126	8.6099e+06	7.05201e+06	0.148166	-0.0690898	0.011102	0.172596	-12.6006	11.6877	-36.8517	356.427	77.1326	5.37962	83.2966	199.604	18.6485	199.604	20.0452	11.8336	18.5952	2000.34	21.0197	-42.7109	63.7306	11.6873	-33.0267
7127	8.7099e+06	7.05201e+06	0.129203	-0.0783772	0.0108397	0.156629	-13.4681	9.93656	-35.7161	361.328	80.8674	5.81817	86.0125	207.042	19.347	207.042	20.2176	11.7486	19.4249	1887.72	19.2998	-41.2914	60.5912	9.93559	-32.5807
7128	8.8099e+06	7.05201e+06	0.111696	-0.0677541	0.0206809	0.167481	-13.6734	9.33419	-34.9267	361.22	79.9733	6.23474	84.8152	205.931	20.7721	205.931	21.838	12.1091	20.4736	1838.53	18.7737	-40.4399	59.2136	9.33418	-31.8293
7129	8.9099e+06	7.05201e+06	0.101774	-0.0745028	0.0427345	0.182245	-13.7779	9.08724	-34.418	373.454	79.8426	7.0696	81.8109	208.242	23.4714	208.237	25.1363	12.6189	21.5322	1815.11	18.6754	-39.986	58.6614	9.07953	-31.448
7130	9.0099e+06	7.05201e+06	0.115655	-0.0804904	0.0399937	0.176755	-13.5078	9.38735	-34.1672	382.817	78.0037	7.87396	76.889	204.705	27.0645	204.655	29.8709	13.0586	22.1803	1819.72	19.056	-39.9094	58.9654	9.33247	-30.3169
7131	9.1099e+06	7.05201e+06	0.131536	-0.0765527	0.0242967	0.162382	-12.9014	9.98785	-33.8011	386.495	75.6957	8.23777	72.3559	198.442	30.5917	198.309	35.7154	12.9438	21.9536	1826.83	19.4986	-39.561	59.0596	9.87086	-28.2635
7132	9.2099e+06	7.05201e+06	0.116478	-0.063877	-0.00499159	0.154961	-11.9032	10.7468	-32.7039	391.377	73.4012	8.6938	67.3512	192.132	34.5622	191.416	41.9707	11.9555	20.6357	1809.03	19.7477	-38.0944	57.842	9.88671	-26.083
7133	9.3099e+06	7.05201e+06	0.104337	-0.0566467	-0.00959416	0.159465	-10.9286	11.4579	-31.3031	402.511	71.6139	9.84409	61.3378	188.075	39.6512	185.23	49.7483	10.7185	19.0823	1780.01	19.9256	-36.0725	55.9981	9.28966	-23.6057
7134	9.4099e+06	7.05201e+06	0.116792	-0.0626308	-0.0103817	0.155241	-10.5859	11.7206	-30.7267	401.564	69.8325	11.1628	56.8487	181.627	43.4224	177.807	56.609	9.97025	18.0968	1768.54	19.9839	-35.006	54.9898	9.55343	-21.0942
7135	9.5099e+06	7.05201e+06	0.116792	-0.0626308	-0.0103817	0.155241	-10.5643	11.4527	-30.5346	380.76	66.512	12.0638	54.1382	169.509	44.2254	166.038	59.7861	9.6472	17.7313	1750.99	19.5744	-34.7512	54.3256	9.50012	-18.4842
7136	9.6099e+06	7.05201e+06	0.116478	-0.063877	-0.00499159	0.154961	-10.6657	10.7992	-30.1139	364.589	63.1172	12.4668	53.2457	161.188	43.4612	157.218	59.6496	9.55567	17.8423	1713.09	18.8121	-34.6816	53.4937	9.31159	-16.9444
7137	9.7099e+06	7.05201e+06	0.0997195	-0.0780163	0.00580868	0.151814	-10.4674	9.68893	-28.4336	367.683	61.3072	12.8876	53.9349	162.875	44.2217	158.18	56.5848	9.13684	18.1492	1604.59	17.3129	-33.0435	50.3564	8.5937	-18.7645
7138	9.8099e+06	7.05201e+06	0.0856145	-0.0586975	-0.00828317	0.154849	-8.59069	9.26509	-24.2765	366.401	59.7906	12.1318	55.2346	163.701	42.2212	157.726	51.9734	8.29732	18.6752	1415.62	16.0894	-28.41	44.4994	8.45442	-18.891
7139	9.9099e+06	7.05201e+06	0.11165	-0.0681377	0.00327885	0.163182	-6.17076	10.0503	-20.3888	356.968	58.1118	11.6976	52.9607	158.487	40.7383	146.928	51.8689	8.24174	20.1817	1291.14	16.3725	-24.4699	40.8424	9.19749	-16.1392
7140	1.00099e+07	7.05201e+06	0.0852906	-0.0529485	-0.00599306	0.173421	-6.04496	10.0859	-19.6559	371.08	59.0268	14.1474	46.0276	156.533	47.9598	146.866	60.407	8.41667	20.5829	1278.84	16.7516	-24.1398	40.8915	9.65721	-16.6041
7141	1.01099e+07	7.05201e+06	0.0648785	-0.0403477	0.0022868	0.185899	-6.49732	9.35246	-19.8062	402.54	62.1418	17.4813	41.4018	160.452	57.2536	153.075	70.1139	8.14701	20.2704	1249.92	15.9809	-24.1782	40.1591	8.87729	-15.7881
7142	1.02099e+07	7.05201e+06	0.0567456	-0.0531379	-0.00537225	0.187833	NA	NA	NA	NA	NA	NA	NA	NA	NA	NA	NA	NA	NA	NA	NA	NA	NA	NA	NA
7143	1.03099e+07	7.05201e+06	0.0567456	-0.0531379	-0.00537225	0.187833	-6.90213	10.8263	-22.463	416.848	63.6723	18.508	38.5274	160.756	62.4469	145.581	81.8649	8.52487	19.3949	1396.42	17.4031	-26.6561	44.0592	9.02077	-10.4195
7144	1.04099e+07	7.05201e+06	0.0567456	-0.0531379	-0.00537225	0.187833	-7.11094	10.6762	-22.7415	434.669	66.3031	19.077	38.7241	167.778	65.9536	149.728	83.8492	8.39242	19.0853	1398.63	17.101	-26.9405	44.0415	8.71992	-10.3779
7145	1.05099e+07	7.05201e+06	0.100293	-0.0692196	0.0141027	0.197502	-7.87976	9.09736	-22.1411	469.499	71.8913	21.7513	39.001	182.205	73.2439	165.212	87.0117	8.14718	19.515	1313.82	15.4622	-26.3711	41.8334	7.4435	-12.1341
7146	1.06099e+07	7.05201e+06	0.0964063	-0.0695055	-0.00423188	0.167264	-7.69198	8.01273	-20.3693	478.609	74.4038	22.7795	39.3021	186.097	74.3722	171.788	89.8201	8.06456	20.6742	1203.69	14.3279	-24.7212	39.0491	6.77645	-12.695
7147	1.07099e+07	7.05201e+06	0.0964063	-0.0695055	-0.00423188	0.167264	-7.09638	7.51763	-18.7756	485.505	75.8351	23.7362	38.667	186.282	75.9396	173.315	92.9287	7.933	21.4376	1122.35	13.7532	-23.2735	37.0267	6.65311	-12.3275
7148	1.08099e+07	7.05201e+06	0.0970982	-0.0478455	-0.0275057	0.170622	-5.9516	7.59659	-17.0585	497.671	77.1004	25.201	36.7758	184.474	79.0318	172.869	99.4562	7.45345	21.2965	1056.9	13.3854	-21.5896	34.9749	7.18434	-10.2617
7149	1.09099e+07	7.05201e+06	0.104589	-0.0581144	-0.0117361	0.180233	-4.73226	7.86456	-15.3962	512.805	78.5181	25.8925	35.1958	183.839	82.6832	177.127	104.83	6.80974	20.769	997.702	12.9177	-19.8389	32.7566	7.57848	-8.51114
7150	1.10099e+07	7.05201e+06	0.089277	-0.0780917	0.0310521	0.190074	NA	NA	NA	NA	NA	NA	NA	NA	NA	NA	NA	NA	NA	NA	NA	NA	NA	NA	NA
7151	1.11099e+07	7.05201e+06	0.089277	-0.0780917	0.0310521	0.190074	NA	NA	NA	NA	NA	NA	NA	NA	NA	NA	NA	NA	NA	NA	NA	NA	NA	NA	NA
7295	-1.05901e+07	6.95201e+06	0.130769	-0.113618	0.0689813	0.166558	NA	NA	NA	NA	NA	NA	NA	NA	NA	NA	NA	NA	NA	NA	NA	NA	NA	NA	NA
7296	-1.04901e+07	6.95201e+06	0.155001	-0.104403	0.0638226	0.164253	-0.588926	11.0635	-11.3281	611.187	122.14	18.0803	61.1677	287.292	68.735	241.765	90.5214	6.35745	20.5928	931.688	15.4259	-15.4523	30.8782	10.5167	-7.91219
7297	-1.03901e+07	6.95201e+06	0.186163	-0.0795313	0.0578221	0.143334	-0.560029	11.4649	-11.5635	551.312	108.906	17.859	59.4513	256.888	63.1064	220.265	81.181	6.97481	21.8867	956.023	16.1742	-15.7439	31.9181	10.6442	-7.89919
7298	-1.02901e+07	6.95201e+06	0.166197	-0.0735756	0.0312605	0.133421	-0.618639	11.603	-11.7598	521.443	99.0291	19.5613	55.2688	235.928	66.5193	206.912	79.8004	7.91071	23.9721	968.621	16.8884	-16.1473	33.0357	10.5251	-7.76127
7299	-1.01901e+07	6.95201e+06	0.163119	-0.0636354	0.0375452	0.164759	-0.868164	11.6156	-12.4009	538.77	99.2702	22.3272	51.9736	239.063	75.3371	211.654	86.3348	8.54177	24.7625	992.591	17.4141	-17.0683	34.4824	10.4016	-7.85574
7300	-1.00901e+07	6.95201e+06	0.163119	-0.0636354	0.0375452	0.164759	-0.892909	11.956	-13.1849	556.928	102.531	24.1773	52.0008	249.634	79.3015	220.733	89.2658	8.84877	24.4651	1035.32	18.0493	-18.1242	36.1735	10.6357	-8.03846
7301	-9.9901e+06	6.95201e+06	0.173043	-0.0704214	0.0405308	0.160231	-0.894218	11.7946	-12.9718	575.903	105.379	25.043	53.2759	260.6	81.164	231.883	92.0223	8.85506	24.5273	1021.84	18.0031	-18.2079	36.211	10.2643	-8.21253
7302	-9.8901e+06	6.95201e+06	0.162826	-0.0683907	0.0364894	0.166737	-1.07652	11.0977	-12.313	599.445	103.618	26.2064	51.0492	261.603	86.0715	231.368	104.919	9.25529	26.2012	972.449	17.4638	-18.1841	35.6479	9.17813	-7.03251
7303	-9.7901e+06	6.95201e+06	0.149447	-0.0619623	0.0260649	0.157841	-1.04212	10.1112	-10.9362	669.339	104.998	28.3616	45.3743	270.977	96.49	216.785	140.738	9.36761	28.4484	880.729	16.3196	-16.9787	33.2983	7.29855	-3.20015
7304	-9.6901e+06	6.95201e+06	0.159424	-0.0679584	0.0269858	0.153847	-0.195269	10.013	-9.05564	779.812	118.707	32.107	42.537	307.579	111.502	203.411	185.487	8.62209	29.0012	798.84	15.6596	-14.2153	29.8749	6.15428	0.611236
7305	-9.5901e+06	6.95201e+06	0.159424	-0.0679584	0.0269858	0.153847	0.903017	10.507	-7.20238	869.095	131.819	38.3056	41.3603	341.822	129.289	205.525	209.35	7.85155	29.0343	741.936	15.7248	-11.3984	27.1232	5.67462	1.53946
7306	-9.4901e+06	6.95201e+06	0.130687	-0.0634801	0.0236155	0.151921	1.89187	11.093	-5.76727	885.556	131.15	42.6086	38.5065	342.054	140.248	214.858	201.994	7.37101	28.9102	706.05	16.0054	-9.54832	25.5537	6.36783	0.533982
7307	-9.3901e+06	6.95201e+06	0.119849	-0.0588493	0.0198355	0.156823	1.62964	10.6045	-5.89546	1079.54	147.481	56.7079	33.9756	395.111	185.023	269.456	243.963	7.2242	28.5816	690.229	15.4446	-9.8077	25.2523	6.81766	-0.255062
7308	-9.2901e+06	6.95201e+06	0.138471	-0.0569314	0.0194851	0.161211	-0.47061	8.85406	-8.69073	1306.36	168.224	69.7123	30.2463	457.457	230.811	326.554	305.541	7.88021	28.7007	732.876	14.0705	-13.3884	27.4588	4.79486	-1.00845
7309	-9.1901e+06	6.95201e+06	0.146903	-0.0597259	0.0296832	0.162022	-2.5333	7.54068	-11.6898	1333.71	166.911	68.6937	29.5107	459.044	227.47	343.761	318.499	8.90214	29.2985	803.568	13.3769	-17.142	30.5189	2.62783	-3.02303
7310	-9.0901e+06	6.95201e+06	0.178129	-0.0674099	0.0209562	0.157295	-4.22413	6.43179	-13.9516	1309.05	159.611	67.4613	28.7799	442.969	221.034	358.565	303.491	9.50233	29.5484	853.021	12.5058	-19.7993	32.3051	1.84253	-4.68682
7311	-8.9901e+06	6.95201e+06	0.168301	-0.0731727	0.0248845	0.148494	-6.75888	3.84279	-16.1222	1071.81	133.742	51.6009	30.4576	371.013	177.851	339.435	236.364	9.33267	29.4014	839.26	9.64457	-22.1579	31.8025	1.70265	-8.8624
7312	-8.8901e+06	6.95201e+06	0.143791	-0.0739757	0.0179773	0.134867	-6.92042	4.18026	-16.8084	731.948	101.92	29.8298	36.9614	274.703	111.885	265.975	159.076	9.74492	29.051	879.498	10.3563	-23.2496	33.6059	2.61825	-10.2741
7313	-8.7901e+06	6.95201e+06	0.122967	-0.0420136	-0.0111599	0.127172	-3.83732	8.7758	-16.2034	457.604	68.0124	15.5669	42.6398	179.307	60.2043	169.8	102.147	11.2107	28.4313	1030.5	16.1066	-23.3594	39.4661	5.49778	-7.41117
7314	-8.6901e+06	6.95201e+06	0.14766	-0.0528673	-0.00514518	0.11848	-2.91118	10.0839	-16.0644	335.69	51.3729	8.11956	47.4506	136.832	39.0914	131.91	73.4305	11.4255	27.7055	1071.81	17.7938	-23.459	41.2528	8.18785	-6.44792
7315	-8.5901e+06	6.95201e+06	0.162166	-0.0513009	-0.00598685	0.120854	-2.58217	10.7353	-16.6378	306.267	49.6335	6.69369	50.408	130.341	34.5596	126.957	58.7301	11.5828	27.1537	1116.28	18.6762	-23.9781	42.6543	9.91998	-7.98532
7316	-8.4901e+06	6.95201e+06	0.162459	-0.0388618	-0.00937524	0.129851	-3.37998	10.2101	-17.5365	370.272	57.8357	10.8704	45.7641	150.002	48.473	144.293	69.737	11.8807	27.4936	1133.65	18.2352	-24.9852	43.2204	9.11286	-9.44063
7317	-8.3901e+06	6.95201e+06	0.189269	-0.0438668	-0.00531525	0.143891	-4.00842	10.2224	-18.8337	431.074	64.69	15.6689	40.5554	166.787	61.619	161.919	81.6	12.3178	27.5975	1189.92	18.2394	-26.4404	44.6797	8.93241	-10.4445
7318	-8.2901e+06	6.95201e+06	0.189269	-0.0438668	-0.00531525	0.143891	-4.17516	10.7719	-20.0828	471.961	69.7965	19.413	38.2857	179.924	68.4134	178.408	89.5637	12.451	26.7312	1263.76	18.756	-27.9025	46.6585	10.1612	-10.9012
7319	-8.1901e+06	6.95201e+06	0.182162	-0.0380883	-0.00869088	0.146917	-4.28194	10.942	-20.458	514.059	77.565	22.8639	39.052	200.883	75.4781	200.856	93.9163	12.1051	25.5829	1288.58	18.8614	-28.4849	47.3463	10.9178	-10.9736
7320	-8.0901e+06	6.95201e+06	0.17001	-0.0467654	0.00241921	0.140289	-4.43965	10.9797	-20.548	534.154	86.1341	23.9139	44.3476	222.501	77.1218	222.499	89.5826	11.6805	24.6988	1297.68	18.852	-28.4633	47.3153	10.9772	-11.2809
7321	-7.9901e+06	6.95201e+06	0.184035	-0.0563079	0.00451341	0.135129	-4.23438	11.7476	-20.9601	519.213	91.6864	21.2164	52.2082	233.241	69.819	233.241	77.2675	11.5127	24.0329	1347.77	19.566	-28.3799	47.946	11.7476	-13.206
7322	-7.8901e+06	6.95201e+06	0.169832	-0.0482652	0.00206405	0.140979	-3.42889	13.2337	-21.0034	476.811	88.5875	18.1867	56.9513	222.974	60.5996	222.974	64.8772	11.8203	23.9741	1412.54	21.2238	-28.1322	49.356	13.2337	-15.7879
7323	-7.7901e+06	6.95201e+06	0.138946	-0.0372177	0.000456514	0.154913	-2.90423	13.8065	-20.2994	441.967	82.1307	17.3172	57.8152	209.86	56.1978	209.86	59.5702	12.6464	25.381	1411.65	22.163	-27.7273	49.8903	13.8065	-14.8833
7324	-7.6901e+06	6.95201e+06	0.118665	-0.0255462	-0.0105676	0.151589	-2.52513	14.2636	-20.0719	401.857	71.318	16.9571	53.6921	185.196	53.3901	185.196	57.2543	12.8456	25.4818	1419.07	22.8152	-27.6367	50.4519	14.2636	-11.825
7325	-7.5901e+06	6.95201e+06	0.087527	-0.0170829	-0.00328106	0.15587	-2.47301	14.7047	-20.6651	354.51	58.0535	16.2333	45.813	151.679	51.0407	151.679	55.1623	12.5206	24.4077	1456.73	23.2607	-28.0507	51.3114	14.7047	-11.4972
7326	-7.4901e+06	6.95201e+06	0.0872925	-0.0175228	-0.00105425	0.155805	-2.68937	14.8511	-21.4219	324.744	48.2736	15.5682	39.5159	128.337	49.9326	127.581	53.0323	12.1204	23.4132	1489.71	23.2226	-28.5469	51.7695	14.3183	-12.4607
7327	-7.3901e+06	6.95201e+06	0.0834837	-0.0251238	0.00404552	0.156835	-2.83205	14.5358	-21.5115	319.181	45.9904	13.8268	40.1219	125.001	46.2924	120.677	50.3905	11.4011	22.495	1477.38	22.3941	-28.2653	50.6594	13.0355	-12.3344
7328	-7.2901e+06	6.95201e+06	0.0985159	-0.0348736	0.00677608	0.134202	-2.96786	14.1424	-21.5269	324.12	46.7744	12.5462	43.1758	127.885	42.4009	121.897	49.3607	10.8167	21.7604	1457.86	21.6842	-27.9956	49.6799	12.8801	-12.3131
7329	-7.1901e+06	6.95201e+06	0.11157	-0.0260785	0.0137999	0.144953	-3.34842	14.2404	-22.3744	331.133	49.1181	11.9968	46.7331	134.49	39.7291	130.814	49.406	10.2676	20.2484	1491.81	21.6162	-29.0762	50.6924	13.2215	-12.8128
7330	-7.0901e+06	6.95201e+06	0.118588	-0.0149487	0.0117725	0.153335	-4.13328	14.2331	-23.5483	342.24	52.0913	12.4799	48.4424	142.815	40.9807	141.9	50.288	9.97727	19.185	1539.3	21.457	-30.525	51.9819	13.7487	-14.6113
7331	-6.9901e+06	6.95201e+06	0.106102	-0.00578183	0.00758933	0.157939	-5.2932	13.6033	-25.0091	354.295	55.0296	13.3797	48.0741	148.108	45.6199	147.788	50.323	9.95995	18.7935	1575.21	20.7927	-32.1978	52.9905	13.0828	-19.9258
7332	-6.8901e+06	6.95201e+06	0.12923	-0.0277211	0.0176188	0.164418	-6.30154	13.0479	-26.2847	363.586	58.2322	13.1285	49.4253	153.953	46.8272	152.819	47.9685	9.98803	18.5529	1605.77	20.4162	-33.4216	53.8379	11.964	-24.6217
7333	-6.7901e+06	6.95201e+06	0.141582	-0.053172	0.0385655	0.161702	-6.72525	12.7577	-26.5434	369.467	60.4124	12.2331	52.484	161.332	44.4013	156.924	44.7751	10.1608	18.812	1603.82	20.4225	-33.6082	54.0308	10.925	-25.6532
7334	-6.6901e+06	6.95201e+06	0.166289	-0.0504901	0.0388663	0.167514	-6.85673	12.4518	-26.1534	370.659	60.1952	11.1021	54.8141	165.668	42.0088	157.317	42.2954	10.1313	19.0308	1572.68	20.2681	-32.9736	53.2416	10.6366	-25.2239
7335	-6.5901e+06	6.95201e+06	0.1659	-0.0529131	0.0462373	0.167339	-7.20197	11.97	-26.1912	362.869	58.8894	9.52127	56.4869	163.984	38.6774	152.851	39.0691	9.7926	18.6796	1554.61	19.769	-32.6471	52.4161	10.3319	-25.2805
7336	-6.4901e+06	6.95201e+06	0.140277	-0.0353471	0.0360981	0.169437	-7.64651	11.7688	-26.6622	348.072	58.9497	7.58118	60.2254	161.458	33.5304	147.185	34.4829	9.5046	18.1227	1566.87	19.602	-32.8402	52.4422	10.1887	-25.2991
7337	-6.3901e+06	6.95201e+06	0.159021	-0.0186087	0.0327042	0.186191	-8.11889	11.3747	-27.0365	344.768	58.9675	7.26138	61.5072	161.784	32.0651	145.89	32.6405	9.226	17.6423	1570.12	19.3024	-32.9948	52.2973	10.0312	-25.7426
7338	-6.2901e+06	6.95201e+06	0.159021	-0.0186087	0.0327042	0.186191	-8.42976	11.1046	-27.3225	344.883	57.5854	8.25022	60.6758	162.704	33.4189	146.8	34.1558	9.09199	17.4237	1573.62	19.0713	-33.1088	52.1801	9.9121	-26.1086
7339	-6.1901e+06	6.95201e+06	0.151425	-0.0613485	0.0493978	0.170505	-8.57527	10.8148	-27.3699	337.557	56.841	8.82405	59.8738	159.725	33.7756	143.841	35.746	8.79139	17.0168	1568.01	18.634	-33.0227	51.6567	9.843	-26.3142
7340	-6.0901e+06	6.95201e+06	0.186286	-0.0580777	0.0504174	0.179066	-8.75083	10.4717	-27.3752	324.03	57.4267	8.64118	59.6586	153.651	32.8876	137.877	36.2245	8.35224	16.3755	1559.22	18.0252	-32.9713	50.9965	9.70037	-26.4999
7341	-5.9901e+06	6.95201e+06	0.150792	-0.0767754	0.0623698	0.220319	NA	NA	NA	NA	NA	NA	NA	NA	NA	NA	NA	NA	NA	NA	NA	NA	NA	NA	NA
7342	-5.8901e+06	6.95201e+06	0.150792	-0.0767754	0.0623698	0.220319	NA	NA	NA	NA	NA	NA	NA	NA	NA	NA	NA	NA	NA	NA	NA	NA	NA	NA	NA
7351	-4.9901e+06	6.95201e+06	0.187858	-0.0675421	0.0685043	0.237746	-6.40147	8.6156	-23.2195	367.719	55.5166	12.8594	49.5258	152.087	40.5512	130.468	40.5512	4.27341	10.4529	1299.57	13.719	-27.1276	40.8467	4.87457	-23.2195
7352	-4.8901e+06	6.95201e+06	0.200892	-0.0884733	0.0724468	0.214093	-6.74769	8.59588	-23.3106	392.384	57.0345	15.2641	46.9926	158.88	47.3914	131.798	47.3959	4.33207	10.5458	1303.5	13.9842	-27.0837	41.0679	4.62448	-23.2962
7353	-4.7901e+06	6.95201e+06	0.200892	-0.0884733	0.0724468	0.214093	-7.13299	8.33314	-23.2206	421.297	58.9489	17.745	44.0792	166.091	55.0611	142.155	55.2709	4.33108	10.7022	1291.55	13.5635	-26.8949	40.4584	6.09871	-22.5337
7354	-4.6901e+06	6.95201e+06	0.200892	-0.0884733	0.0724468	0.214093	-7.29892	8.12529	-22.9743	426.167	59.6304	17.9444	42.5598	166.604	58.4208	146.359	60.1057	4.10718	10.3219	1272.67	13.3728	-26.4113	39.7841	7.37589	-19.9092
7355	-4.5901e+06	6.95201e+06	0.200892	-0.0884733	0.0724468	0.214093	-7.13086	7.89178	-22.5014	401.421	56.9484	16.6626	40.9902	155.995	57.0712	142.205	59.7205	3.94738	10.1378	1244	13.0785	-25.8612	38.9397	7.56904	-18.9307
7356	-4.4901e+06	6.95201e+06	0.194094	-0.0762739	0.0999154	0.23628	-6.5955	7.45642	-21.557	357.645	51.8549	15.4432	39.5195	137.694	52.64	131.881	54.9713	4.40904	12.4852	1188.66	12.4044	-25.2353	37.6397	7.34679	-18.7848
7357	-4.3901e+06	6.95201e+06	0.179078	-0.0520295	0.0983255	0.264518	NA	NA	NA	NA	NA	NA	NA	NA	NA	NA	NA	NA	NA	NA	NA	NA	NA	NA	NA
7359	-4.1901e+06	6.95201e+06	0.105901	-0.0833824	0.10592	0.24146	NA	NA	NA	NA	NA	NA	NA	NA	NA	NA	NA	NA	NA	NA	NA	NA	NA	NA	NA
7404	309904	6.95201e+06	-0.0283507	-0.0666947	0.0168756	0.124794	6.26381	12.4781	0.82136	2566.6	308.65	106.597	34.291	886.869	364.605	475.905	780.3	4.36135	25.3625	485.832	15.8348	-1.3397	17.1745	4.1771	7.97546
7405	409904	6.95201e+06	0.00757915	-0.0622569	0.028508	0.148893	2.55445	10.0069	-3.73251	2220.1	269.926	89.4492	34.2375	762.172	307.084	416.98	686.251	4.8097	23.8536	569.542	13.8671	-6.27027	20.1374	-0.239225	4.77034
7406	509904	6.95201e+06	0.016227	-0.0674315	0.0201785	0.143124	-0.486481	8.47666	-8.08619	1063.6	119.152	45.3783	27.6435	341.071	166.703	268.277	280.816	6.69427	26.3933	682.267	13.5158	-11.7037	25.2195	0.714669	-1.24389
7407	609904	6.95201e+06	0.00345844	-0.0637415	0.00983366	0.117978	1.38812	11.3272	-7.6138	726.768	86.9918	32.1057	32.0469	249.184	112.987	246.454	130.386	7.94896	27.4916	771.503	17.5218	-11.3879	28.9097	10.2313	-3.83672
7408	709904	6.95201e+06	-0.00950181	-0.0652679	0.010407	0.115233	2.70317	13.0308	-7.18018	732.391	86.5991	32.4128	31.1497	248.528	114.829	243.346	129.277	8.4746	27.3383	817.057	19.633	-11.2817	30.9148	11.1692	-2.91838
7409	809904	6.95201e+06	0.0104264	-0.0690762	0.00493723	0.128205	2.43696	12.959	-7.75129	774.221	89.2871	35.5967	28.7849	256.526	124.885	253.88	140.014	9.73335	29.6458	835.475	20.2742	-12.5386	32.8127	11.8546	-4.49438
7410	909904	6.95201e+06	-0.00402234	-0.0599089	0.00469754	0.131687	3.22374	13.5922	-6.63443	722.607	87.8685	32.64	29.8127	246.704	115.833	245.792	128.036	9.32984	29.1919	817.094	20.6287	-11.2973	31.926	13.1563	-4.8868
7411	1.0099e+06	6.95201e+06	-0.0530879	-0.0664159	0.00304363	0.103647	4.16366	14.3154	-5.25467	657.561	81.6225	29.6959	29.8257	227.929	107.842	223.656	119.661	8.6794	28.3405	791.491	20.9574	-9.66468	30.622	13.4091	-4.03359
7412	1.1099e+06	6.95201e+06	-0.0634176	-0.0797568	0.013451	0.103481	5.07328	14.8321	-3.74018	619.532	75.2333	29.6476	28.3726	212.353	105.526	202.861	121.469	8.29338	28.326	753.325	21.2354	-8.00967	29.245	13.6367	-1.65878
7413	1.2099e+06	6.95201e+06	-0.124257	-0.0613123	0.00845255	0.117128	NA	NA	NA	NA	NA	NA	NA	NA	NA	NA	NA	NA	NA	NA	NA	NA	NA	NA	NA
7414	1.3099e+06	6.95201e+06	-0.045247	-0.0601392	0.000440379	0.130682	NA	NA	NA	NA	NA	NA	NA	NA	NA	NA	NA	NA	NA	NA	NA	NA	NA	NA	NA
7415	1.4099e+06	6.95201e+06	-0.0561307	-0.0656106	-0.00264145	0.110326	4.80274	14.9667	-4.50689	621.074	75.1952	31.234	30.0189	210.089	103.219	194.701	127.16	6.98181	23.5048	792.969	20.4804	-8.95446	29.4349	11.638	0.339103
7416	1.5099e+06	6.95201e+06	-0.0617681	-0.0602858	-0.00437127	0.106399	4.36197	15.0477	-5.50448	636.777	80.0849	32.0266	31.2193	218.852	103.777	209.551	131.551	7.91254	25.0569	834.424	21.2973	-10.2287	31.526	12.3977	-0.456325
7417	1.6099e+06	6.95201e+06	-0.0822286	-0.0568457	-0.00428424	0.105251	4.16465	15.1607	-6.06901	635.761	80.1843	31.9988	31.2994	219.955	103.486	207.889	131.3	7.94829	24.5315	860.334	21.4812	-10.8783	32.3596	12.6419	-0.311539
7418	1.7099e+06	6.95201e+06	-0.0822286	-0.0568457	-0.00428424	0.105251	4.15032	15.4307	-6.45319	638.466	77.7249	32.5708	30.0191	215.236	105.102	198.554	134.328	7.61992	23.3205	885.36	21.6002	-11.0233	32.6235	11.8934	0.585199
7419	1.8099e+06	6.95201e+06	-0.0450927	-0.0697709	-0.00259029	0.100058	4.13158	15.6554	-6.8375	647.444	79.7288	32.4854	30.794	218.338	104.571	201.13	135.356	7.05122	21.6836	909.084	21.4308	-11.0783	32.5091	11.564	-0.635253
7420	1.9099e+06	6.95201e+06	-0.0137386	-0.0710112	-0.0024782	0.107627	4.24655	15.4332	-6.50892	635.012	81.1735	31.3096	31.8325	219.325	99.2666	208.832	127.253	6.92941	21.6627	891.079	21.2751	-10.731	32.0061	13.6737	-2.19517
7421	2.0099e+06	6.95201e+06	-0.0140132	-0.0647951	-0.00611867	0.113233	3.97639	14.9033	-6.2952	634.033	80.8748	30.2983	32.3789	219.666	98.2805	206.957	119.272	6.98047	22.0138	864.341	20.8436	-10.879	31.7226	13.2526	-2.68493
7422	2.1099e+06	6.95201e+06	0.0207901	-0.0743368	-0.0172228	0.108517	3.07203	14.8382	-8.48697	668.684	84.067	30.7618	31.8128	230.722	104.888	218.07	127.976	7.62219	22.0362	945.283	21.0948	-13.5033	34.5981	13.2471	-3.63674
7423	2.2099e+06	6.95201e+06	0.0294368	-0.0700943	-0.0194932	0.116531	2.83126	14.8978	-9.46307	685.237	85.389	31.8163	30.7687	235.122	108.425	229.247	130.856	8.05356	22.3183	977.625	21.3851	-14.7052	36.0903	13.0747	-3.54382
7424	2.3099e+06	6.95201e+06	0.0189088	-0.050067	-0.0167367	0.130184	2.66884	14.8967	-9.49839	665.348	84.7187	30.1136	32.4109	231.194	100.598	227.878	121.925	8.11579	22.3446	980.221	21.6191	-14.701	36.3201	12.8316	-5.40625
7425	2.4099e+06	6.95201e+06	0.0309993	-0.0549923	-0.0171795	0.127577	2.39246	14.864	-9.92503	615.232	79.8155	26.1806	34.6807	221.924	89.5463	221.624	103.637	7.57506	20.8871	998.13	21.4636	-14.7898	36.2535	14.4778	-8.3472
7426	2.5099e+06	6.95201e+06	0.0252879	-0.0560925	-0.0147792	0.134628	2.2033	14.8252	-10.349	613.438	77.1358	27.6736	33.2681	219.975	91.6619	219.975	107.453	7.45327	20.3777	1014.16	21.4176	-15.1439	36.5615	14.8252	-8.18148
7427	2.6099e+06	6.95201e+06	0.0171679	-0.0463987	-0.0276107	0.136482	1.98016	14.7323	-10.6787	629.021	76.9641	29.8545	30.575	221.107	98.3301	221.107	115.451	7.8041	21.0795	1021.51	21.4021	-15.6163	37.0184	14.7323	-8.50355
7428	2.7099e+06	6.95201e+06	0.00400049	-0.0485046	-0.0264284	0.131812	2.02917	14.9184	-10.7763	604.876	76.8866	28.4586	31.6947	218.752	94.8657	218.752	109.943	8.04507	21.3943	1032.96	21.8126	-15.7947	37.6074	14.9184	-8.75529
7429	2.8099e+06	6.95201e+06	0.0168192	-0.0475952	-0.0235122	0.13414	1.89258	14.8467	-11.0612	595.089	75.2466	27.048	32.6059	216.602	91.51	216.602	108.362	7.96867	21.0394	1041.51	21.668	-16.2052	37.8732	14.8467	-8.08217
7430	2.9099e+06	6.95201e+06	0.0231956	-0.0492151	-0.0219859	0.140039	1.71676	15.0133	-11.6039	575.136	72.1968	25.1068	33.2142	208.103	86.2661	208.103	101.934	8.27117	21.151	1069.8	22.0547	-17.0458	39.1005	15.0133	-6.66751
7431	3.0099e+06	6.95201e+06	0.0231956	-0.0492151	-0.0219859	0.140039	1.53168	15.0786	-12.1324	577.739	72.0177	24.983	33.2308	206.152	84.6618	206.152	101.696	8.47844	21.19	1094.03	22.3676	-17.6426	40.0102	15.0786	-5.45922
7432	3.1099e+06	6.95201e+06	0.0118753	-0.0579134	-0.0217566	0.133134	1.43633	14.9641	-12.2725	595.58	75.4012	25.7705	33.9808	211.885	85.0822	211.885	104.68	8.22182	20.8837	1094.16	22.175	-17.1915	39.3665	14.9641	-4.74848
7433	3.2099e+06	6.95201e+06	0.0118753	-0.0579134	-0.0217566	0.133134	1.16555	14.8824	-12.7142	583.003	76.274	25.0355	35.3035	211.205	82.5001	211.205	102.074	8.42824	21.0843	1107.83	22.2666	-17.688	39.9546	14.8824	-5.11044
7434	3.3099e+06	6.95201e+06	0.0121346	-0.0514159	-0.0194511	0.147811	0.612286	14.449	-13.5309	600.181	77.0896	26.4348	33.4006	215.014	86.9383	215.014	109.86	9.10742	22.0194	1123.19	22.0399	-19.3143	41.3542	14.449	-5.78278
7435	3.4099e+06	6.95201e+06	-0.0129179	-0.0475118	-0.0223892	0.146131	0.599128	14.619	-13.6953	607.245	75.3579	27.9896	31.1935	212.171	90.4826	212.171	113.791	8.81089	21.3141	1137.12	22.0464	-19.2851	41.3314	14.619	-5.66241
7436	3.5099e+06	6.95201e+06	-0.0354139	-0.0473501	-0.0158865	0.155624	0.568008	14.8775	-13.8682	632.69	78.4586	28.6198	30.2932	216.444	95.1957	216.431	120.202	8.38494	20.48	1156.28	22.0138	-18.9222	40.9361	14.8656	-5.65125
7437	3.6099e+06	6.95201e+06	-0.0526544	-0.0498985	-0.0125665	0.159356	0.171165	14.8312	-14.5727	702.822	84.0338	32.0906	28.6145	232.514	108.324	231.343	137.18	8.53419	20.0194	1183.75	22.4448	-20.1383	42.5831	14.2881	-6.52186
7438	3.7099e+06	6.95201e+06	-0.0526544	-0.0498985	-0.0125665	0.159356	-0.856071	13.9817	-15.752	723.611	91.0169	31.4756	32.5692	253.329	109.039	249.931	127.206	9.2549	20.2825	1198.12	22.6381	-22.9349	45.573	12.3707	-10.4623
7439	3.8099e+06	6.95201e+06	-0.0515604	-0.0526694	-0.0161409	0.146704	-1.20436	13.8318	-16.5862	625.467	92.363	23.7208	42.9768	246.258	83.8488	245.55	92.9136	9.8817	21.485	1222.24	22.1699	-23.7857	45.9557	13.3481	-13.7544
7440	3.9099e+06	6.95201e+06	-0.0399333	-0.0505654	-0.0166931	0.153065	-0.486189	15.0433	-16.9301	523.188	84.6975	17.7244	50.663	224.931	62.345	224.931	69.5034	10.1501	21.7871	1284	22.9835	-23.6013	46.5848	15.0426	-13.8909
7441	4.0099e+06	6.95201e+06	-0.0399333	-0.0505654	-0.0166931	0.153065	-0.414373	15.3505	-16.9974	520.408	82.4076	17.8428	50.37	223.596	62.2231	223.596	70.6357	9.78957	21.0989	1301.66	23.3029	-23.0964	46.3993	15.3505	-14.3076
7442	4.1099e+06	6.95201e+06	-0.0390294	-0.0566911	-0.00711583	0.158283	-0.583355	15.5023	-17.3368	530.833	80.5052	18.6625	47.8732	222.513	66.0462	222.513	76.1313	9.84756	20.9417	1318.52	23.5065	-23.51	47.0165	15.5018	-14.6581
7443	4.2099e+06	6.95201e+06	-0.02823	-0.0485664	-0.0175955	0.15816	-0.776171	15.5752	-17.6955	534.759	79.1432	19.2816	45.9997	219.698	67.7754	219.693	79.4101	9.46579	20.1033	1333.76	23.2896	-23.7921	47.0816	15.5617	-14.2236
7444	4.3099e+06	6.95201e+06	-0.0159108	-0.0464622	-0.0185453	0.163523	-1.0365	15.6175	-18.1397	539.01	78.0434	19.6397	44.7904	218.552	68.1178	218.552	81.5483	9.13464	19.3019	1353.79	23.0981	-24.2279	47.326	15.6169	-12.3035
7445	4.4099e+06	6.95201e+06	0.0102947	-0.0423983	-0.0212374	0.17053	-1.25352	15.5462	-18.4445	538.555	76.3869	19.8063	43.6716	215.944	68.1032	215.944	82.9944	9.32089	19.5073	1362.24	23.1042	-24.6683	47.7725	15.5462	-10.6066
7446	4.5099e+06	6.95201e+06	-0.00339861	-0.0447261	-0.0201635	0.164687	-1.62223	15.2171	-18.7575	534.34	76.0296	19.7763	44.0889	215.514	67.1615	215.514	80.8786	9.81074	20.4031	1361.75	23.2043	-24.887	48.0913	15.2171	-11.1156
7447	4.6099e+06	6.95201e+06	-0.00339861	-0.0447261	-0.0201635	0.164687	-1.8998	15.0597	-18.9443	537.773	77.3115	19.9679	44.2846	217.391	66.6464	217.391	81.5924	10.1323	20.9516	1364.26	23.293	-25.0765	48.3694	15.0597	-10.7898
7448	4.7099e+06	6.95201e+06	-0.00488596	-0.0573522	-0.0266276	0.154941	-2.0293	15.0288	-19.1795	558.256	80.8414	21.3025	42.7978	222.745	71.1031	222.745	87.3801	9.8104	20.3461	1371.18	22.9865	-25.2208	48.2074	15.0288	-11.2503
7449	4.8099e+06	6.95201e+06	0.00915614	-0.0553186	-0.0279169	0.160672	-2.18552	14.9623	-19.5267	558.634	84.0088	20.7812	44.0123	226.181	70.911	226.181	85.3919	9.23831	19.3868	1380.13	22.5401	-25.1132	47.6533	14.9623	-14.5562
7450	4.9099e+06	6.95201e+06	0.00915614	-0.0553186	-0.0279169	0.160672	-2.38231	14.8977	-19.741	531.008	82.5131	18.5264	47.3609	222.384	63.5747	222.384	75.6944	9.4357	19.651	1387.57	22.541	-25.4731	48.014	14.8977	-16.3093
7451	5.0099e+06	6.95201e+06	0.00915614	-0.0553186	-0.0279169	0.160672	-2.38348	15.1778	-19.6969	517.736	79.8272	17.5181	48.4328	218.583	60.1814	218.583	71.8275	9.84067	20.1556	1400.72	23.0047	-25.8264	48.8312	15.1778	-17.0811
7452	5.1099e+06	6.95201e+06	0.00915614	-0.0553186	-0.0279169	0.160672	-2.45401	15.3693	-19.8806	535.132	80.7198	18.4991	46.1205	219.031	64.1383	219.031	77.154	9.80629	19.8097	1416.17	23.3671	-26.1353	49.5025	15.3693	-17.2371
7453	5.2099e+06	6.95201e+06	0.00363599	-0.057631	-0.0108235	0.172847	-2.84833	15.0814	-20.4867	559.668	80.9917	20.4888	42.9722	220.366	70.5073	220.359	84.3779	10.3707	20.4856	1428.81	23.6779	-26.9186	50.5964	15.0706	-17.5876
7454	5.3099e+06	6.95201e+06	0.00363599	-0.057631	-0.0108235	0.172847	-3.26294	14.7165	-21.0617	583.129	79.2668	22.7976	39.4914	220.339	77.6747	220.234	92.3021	10.9434	21.2962	1436.47	23.7903	-27.5906	51.3809	14.5148	-17.9248
7455	5.4099e+06	6.95201e+06	-0.0131995	-0.0574921	0.00164225	0.171947	-3.47142	14.6541	-21.4551	593.33	77.0794	24.181	36.5498	215.894	82.2799	215.333	98.9962	10.9363	21.126	1450.43	23.8406	-27.9295	51.7701	13.7934	-15.5812
7456	5.5099e+06	6.95201e+06	-0.0131995	-0.0574921	0.00164225	0.171947	-3.4173	14.8022	-21.4677	588.366	75.4322	23.7699	35.5264	209.798	80.5876	208.8	101.216	10.4659	20.2891	1457.59	23.7942	-27.7876	51.5818	13.7354	-12.2252
7457	5.6099e+06	6.95201e+06	0.00682168	-0.0614543	-0.0120177	0.155936	-3.15481	15.1287	-21.2193	584.389	74.3715	23.0934	35.0672	205.347	78.5788	203.586	102.531	9.98881	19.5055	1461.49	23.873	-27.34	51.213	13.7109	-11.5499
7458	5.7099e+06	6.95201e+06	0.00605021	-0.0689912	-0.00739611	0.147049	-3.1668	15.3055	-21.6049	582.147	73.5959	22.586	34.5931	202.306	78.1226	200.18	103.188	9.99559	19.2777	1482.58	24.1317	-27.7033	51.835	13.4788	-11.9559
7459	5.8099e+06	6.95201e+06	-0.00683209	-0.0705178	-0.00673216	0.142108	-4.00184	14.2831	-22.4694	579.414	75.2545	22.3263	35.4126	204.126	77.5974	203.696	99.4653	10.6594	20.2862	1476.31	23.7174	-28.7753	52.4926	13.7408	-15.456
7460	5.9099e+06	6.95201e+06	0.0112748	-0.074248	-0.00580145	0.132237	-4.77604	13.4663	-23.3753	559.866	75.9771	21.3518	36.6499	201.806	74.4324	201.794	93.4041	11.7097	21.918	1480.28	23.5299	-29.8685	53.3984	13.4451	-17.8461
7461	6.0099e+06	6.95201e+06	0.0310348	-0.0674855	-0.00118809	0.145868	-5.5258	13.2104	-25.0807	530.699	76.1151	19.76	38.3206	194.357	69.4101	194.041	86.1946	12.0935	22.0269	1536.2	23.2382	-31.7263	54.9645	12.877	-19.6211
7462	6.1099e+06	6.95201e+06	0.0339056	-0.0743997	0.00932595	0.151174	-6.1712	13.1549	-26.6269	504.404	76.2939	18.0785	40.4415	188.797	64.4187	186.905	78.4582	11.8595	21.0664	1596.78	22.9323	-33.3949	56.3272	11.5374	-22.3491
7463	6.2099e+06	6.95201e+06	0.0261481	-0.0688985	0.0122839	0.15666	-6.46754	13.4169	-27.6587	465.287	72.7774	15.9244	42.9806	180.278	56.846	178.333	68.8061	12.1668	21.0408	1649.99	23.3096	-34.5331	57.8427	11.6902	-23.7663
7464	6.3099e+06	6.95201e+06	0.0261481	-0.0688985	0.0122839	0.15666	-6.07122	14.3963	-27.883	424.786	67.9	13.8282	45.8582	171.276	49.0567	170.733	59.4624	11.8912	20.0192	1698.15	24.2385	-35.2405	59.479	13.738	-24.1656
7465	6.4099e+06	6.95201e+06	0.0456536	-0.0793685	0.0222628	0.166566	-5.65559	15.0343	-27.5115	397.617	64.519	12.1778	47.9453	165.696	43.8535	165.689	53.4152	11.7886	19.6791	1710.22	24.7385	-35.1891	59.9277	15.0156	-23.8884
7466	6.5099e+06	6.95201e+06	0.0456536	-0.0793685	0.0222628	0.166566	-6.20433	14.365	-27.7167	386.61	62.298	11.5092	48.4019	163.179	41.9213	163.179	51.1365	12.9018	21.5626	1698.11	24.3161	-35.487	59.803	14.365	-24.0636
7467	6.6099e+06	6.95201e+06	0.0532971	-0.0848848	0.0188507	0.160483	-7.00932	13.4985	-28.5279	383.732	61.237	11.3196	48.5654	162.586	41.4528	162.586	49.9172	14.0308	23.0866	1699.28	23.8386	-36.9249	60.7635	13.4985	-24.8615
7468	6.7099e+06	6.95201e+06	0.0532971	-0.0848848	0.0188507	0.160483	-7.25728	13.4221	-28.9681	377.145	59.5474	11.1936	48.7874	160.033	40.7224	160.033	48.4563	14.3931	23.4729	1714.68	23.8817	-37.4495	61.3312	13.4221	-25.3736
7469	6.8099e+06	6.95201e+06	0.0742897	-0.0874764	0.0204675	0.155949	-6.92589	13.9775	-28.665	366.133	56.6056	11.1979	47.7199	153.199	40.2362	153.199	47.7669	14.0137	22.9262	1727.28	24.1453	-36.9784	61.1236	13.9775	-25.1545
7470	6.9099e+06	6.95201e+06	0.0904768	-0.0865133	0.0201563	0.160054	-6.55441	14.3756	-28.1937	360.451	54.6622	11.1302	46.8447	149.652	40.2698	149.652	47.622	13.1334	21.8842	1725.51	23.9557	-36.0384	59.9941	14.3756	-24.6706
7471	7.0099e+06	6.95201e+06	0.0895835	-0.0878447	0.00835553	0.155024	-6.4636	14.3909	-27.8973	369.838	56.3999	11.5246	47.6482	155.077	41.3375	155.077	49.6044	12.153	20.7192	1715.43	23.593	-35.0279	58.6209	14.3909	-24.1768
7472	7.1099e+06	6.95201e+06	0.0895835	-0.0878447	0.00835553	0.155024	-6.40289	14.3593	-27.61	384.439	59.1474	12.3646	47.8025	161.857	43.7188	161.857	53.67	11.3436	19.7286	1705.09	23.3621	-34.103	57.4651	14.3593	-22.2838
7473	7.2099e+06	6.95201e+06	0.0850066	-0.0801729	-0.00271567	0.149317	-6.19992	14.4997	-27.3291	386.749	60.4213	12.4169	48.571	164.178	42.8248	164.178	56.4605	11.0491	19.3751	1700.21	23.4062	-33.6031	57.0093	14.4997	-17.1322
7474	7.3099e+06	6.95201e+06	0.0959642	-0.0845508	-0.00356142	0.146053	-6.14604	14.6738	-27.5669	370.19	60.3724	10.7649	53.3001	163.831	36.486	163.831	52.197	11.2025	19.538	1718.26	23.6045	-33.7123	57.3168	14.6738	-15.7634
7475	7.4099e+06	6.95201e+06	0.0959642	-0.0845508	-0.00356142	0.146053	-6.47234	14.6273	-28.3464	345.507	61.2163	8.96017	60.7625	164.076	31.2466	164.076	42.4823	11.6589	20.082	1750.69	23.5599	-34.4547	58.0146	14.6273	-18.4819
7476	7.5099e+06	6.95201e+06	0.0959642	-0.0845508	-0.00356142	0.146053	-6.88338	14.3761	-29.0553	320.487	62.5625	7.77912	66.4003	160.591	28.3195	160.591	35.3541	12.5341	21.0171	1770.61	23.6591	-35.9243	59.5835	14.3761	-20.8723
7477	7.6099e+06	6.95201e+06	0.129811	-0.082038	-0.00482195	0.157007	-7.19941	14.2328	-29.5442	309.462	61.4661	7.79302	66.4265	155.185	28.2801	155.185	34.8859	12.7432	21.0363	1787.84	23.7304	-36.8574	60.5878	14.2328	-22.3071
7478	7.7099e+06	6.95201e+06	0.132333	-0.0840016	-0.0146977	0.152718	-7.47097	14.4401	-30.4337	316.704	59.0666	8.45238	62.5924	153.602	30.7386	153.602	37.78	11.9599	19.6832	1834.22	23.6218	-37.1741	60.7959	14.4401	-23.7262
7479	7.8099e+06	6.95201e+06	0.141956	-0.0875772	-0.0102908	0.148324	-8.17993	14.3451	-31.9333	331.576	58.452	9.00111	61.1939	158.299	32.5049	158.299	39.4643	12.0677	19.4086	1892.16	23.6979	-38.4617	62.1596	14.3451	-25.0803
7480	7.9099e+06	6.95201e+06	0.141956	-0.0875772	-0.0102908	0.148324	-8.74788	14.1894	-33.0398	341.741	58.5336	9.40495	62.2609	164.552	33.5145	164.552	38.7498	12.1863	19.3199	1932.67	23.6183	-39.451	63.0693	14.1894	-27.6572
7481	8.0099e+06	6.95201e+06	0.132546	-0.0822103	-0.0142735	0.151893	-8.93774	14.3119	-33.622	341.193	58.093	9.06724	64.7136	167.861	32.294	167.861	36.8168	12.0332	18.9661	1964.19	23.4721	-39.9271	63.3992	14.3119	-28.2801
7482	8.1099e+06	6.95201e+06	0.132546	-0.0822103	-0.0142735	0.151893	-9.49308	14.218	-34.7089	335.726	57.3782	8.26958	66.3243	167.458	30.0664	167.458	34.5881	12.9337	19.8812	2007.62	23.6434	-41.3752	65.0186	14.218	-28.4635
7483	8.2099e+06	6.95201e+06	0.13003	-0.0801954	-0.00438561	0.156159	-10.1254	14.1637	-36.0198	318.54	54.771	7.2469	67.2016	159.76	27.0894	159.76	31.4353	13.8133	20.6604	2063.84	24.0003	-42.8988	66.8992	14.1637	-30.5046
7484	8.3099e+06	6.95201e+06	0.108483	-0.069209	-0.00765374	0.164158	-10.3385	14.4077	-36.876	305.897	52.2485	6.78715	66.05	151.803	26.0728	151.803	30.0939	13.9096	20.5104	2115.05	24.3193	-43.5366	67.8559	14.4077	-31.2127
7485	8.4099e+06	6.95201e+06	0.102086	-0.062858	-0.00485666	0.170736	-10.2702	14.9248	-37.492	304.444	52.7318	6.6447	65.7195	150.153	25.1198	150.153	29.9828	13.4322	19.6291	2165.64	24.675	-43.8001	68.475	14.9248	-30.3751
7486	8.5099e+06	6.95201e+06	0.139322	-0.0758728	0.0112704	0.179983	-10.2044	15.1384	-37.7992	309.719	55.7344	6.1653	67.6054	153.876	23.4028	153.876	27.6458	12.7403	18.5926	2185.53	24.5889	-43.9838	68.5727	15.1384	-31.7022
7487	8.6099e+06	6.95201e+06	0.139008	-0.077119	0.0166605	0.179703	-10.4135	14.9152	-38.0102	317.391	60.0033	5.59342	71.8567	161.86	21.538	161.824	25.793	12.3774	18.0737	2181.96	24.2371	-44.2724	68.5095	14.8064	-32.423
7488	8.7099e+06	6.95201e+06	0.130108	-0.0848485	0.0202442	0.168029	-11.2062	13.7141	-37.7192	345.702	68.6423	5.7027	76.3074	181.73	21.2448	181.387	24.5476	12.198	18.2153	2118.84	23.1135	-43.9039	67.0174	12.918	-32.5104
7489	8.8099e+06	6.95201e+06	0.119153	-0.0787255	0.0167179	0.17266	-11.9209	12.0133	-36.3646	376.064	77.2215	6.21231	79.3771	201.926	22.1177	201.537	24.2101	11.9403	18.7881	1993.5	21.3674	-42.3368	63.7042	11.306	-31.7902
7490	8.9099e+06	6.95201e+06	0.124904	-0.0726941	0.0150673	0.175555	-11.5485	10.8776	-33.3549	393.316	82.0702	6.65623	80.7036	213.522	22.9357	213.155	24.855	11.7851	20.0134	1826.11	19.9112	-39.1702	59.0814	10.3774	-29.6017
7491	9.0099e+06	6.95201e+06	0.131536	-0.0765527	0.0242967	0.162382	-10.613	10.6042	-30.7846	403.591	82.1973	7.00654	79.3	216.457	23.6177	214.767	25.6887	12.1107	21.6009	1713.86	19.3537	-36.8326	56.1863	9.56763	-27.4444
7492	9.1099e+06	6.95201e+06	0.131536	-0.0765527	0.0242967	0.162382	-9.75268	10.5634	-28.589	421.664	81.8888	7.4731	76.2026	220.14	25.1818	215.912	27.7761	12.5838	23.2738	1627.01	19.286	-34.8417	54.1277	9.10282	-25.591
7493	9.2099e+06	6.95201e+06	0.13796	-0.0769531	0.00813009	0.147929	-9.581	10.5926	-28.2068	434.597	79.7573	8.52409	70.3188	216.697	30.4592	210.38	34.8317	12.8876	24.0105	1615.03	19.2845	-34.454	53.7385	8.86317	-25.1998
7494	9.3099e+06	6.95201e+06	0.13796	-0.0769531	0.00813009	0.147929	-9.76416	10.7255	-28.814	451.229	77.3792	9.89896	63.0219	211.783	38.3612	203.477	45.2856	12.7376	23.5362	1644.28	19.3758	-34.8437	54.2195	8.61864	-25.4674
7495	9.4099e+06	6.95201e+06	0.13796	-0.0769531	0.00813009	0.147929	-9.76845	10.9232	-28.8461	479.532	77.0311	11.3352	57.2173	212.294	46.1333	202.211	55.3994	12.0387	22.4027	1654.24	19.3422	-34.4706	53.8128	8.82644	-25.4882
7496	9.5099e+06	6.95201e+06	0.126904	-0.0703778	0.00409927	0.152061	-9.46644	11.1704	-28.2917	489.851	76.5633	12.3768	54.2381	209.81	50.7097	197.244	61.3281	11.2169	21.2597	1645.37	19.2344	-33.4692	52.7036	8.43666	-24.7808
7497	9.6099e+06	6.95201e+06	0.120589	-0.0622929	-0.00822282	0.145732	-9.3415	10.6224	-27.2112	461.964	76.0272	12.8321	54.4934	200.111	49.6601	189.34	60.5068	9.82235	19.6301	1579.9	18.145	-31.7339	49.8789	8.10308	-22.8186
7498	9.7099e+06	6.95201e+06	0.126425	-0.0686611	-0.0109179	0.139912	-9.13699	9.75855	-25.886	417.888	70.3679	13.1695	53.9425	183.121	47.8715	176.349	59.1955	8.37849	17.9957	1490.7	16.6288	-29.8813	46.51	8.31874	-19.9986
7499	9.8099e+06	6.95201e+06	0.0942451	-0.0797708	-0.00186376	0.150673	-8.5712	9.16117	-24.0897	413.292	65.2753	14.4962	50.5504	176.029	50.6892	168.733	63.319	7.59396	17.4262	1397.72	15.6397	-27.9334	43.5731	8.13717	-18.5741
7500	9.9099e+06	6.95201e+06	0.0605567	-0.0784567	-0.00459504	0.169052	-6.58939	9.54628	-20.9097	424.035	63.2291	14.6164	49.3626	176.7	51.5497	159.916	66.0056	6.9784	17.4502	1282.35	15.2883	-24.7043	39.9926	7.55162	-15.166
7501	1.00099e+07	6.95201e+06	0.0285259	-0.0603571	0.00735256	0.189478	NA	NA	NA	NA	NA	NA	NA	NA	NA	NA	NA	NA	NA	NA	NA	NA	NA	NA	NA
7502	1.01099e+07	6.95201e+06	0.0319343	-0.0421899	0.00301299	0.203788	NA	NA	NA	NA	NA	NA	NA	NA	NA	NA	NA	NA	NA	NA	NA	NA	NA	NA	NA
7503	1.02099e+07	6.95201e+06	0.0319343	-0.0421899	0.00301299	0.203788	NA	NA	NA	NA	NA	NA	NA	NA	NA	NA	NA	NA	NA	NA	NA	NA	NA	NA	NA
7504	1.03099e+07	6.95201e+06	0.0365916	-0.0522129	0.0201095	0.214842	NA	NA	NA	NA	NA	NA	NA	NA	NA	NA	NA	NA	NA	NA	NA	NA	NA	NA	NA
7505	1.04099e+07	6.95201e+06	0.0397879	-0.044032	-0.0109106	0.194553	-4.98377	10.0512	-18.4537	490.409	68.3206	25.3671	34.9148	181.392	80.0304	153.865	96.1547	7.56863	21.5461	1200.05	15.7187	-22.396	38.1147	6.07335	-8.76604
7506	1.05099e+07	6.95201e+06	0.066243	-0.0612603	-0.00877181	0.17916	-5.80756	10.1556	-19.973	503.783	70.7	25.8247	35.5833	187.697	82.2319	160.698	96.6571	7.65542	19.2024	1264.27	16.0055	-24.0083	40.0138	5.87861	-9.19122
7507	1.06099e+07	6.95201e+06	0.0611919	-0.052346	-0.0223945	0.17096	-6.06273	10.1729	-20.3572	484.545	70.2971	23.0884	37.2419	182.735	76.8743	158.973	91.2992	7.43371	18.6159	1280.39	15.6939	-24.3565	40.0504	6.77133	-9.30294
7508	1.07099e+07	6.95201e+06	0.0810906	-0.0498321	-0.0243738	0.176685	-5.71154	9.5596	-18.9355	479.251	71.1773	21.0987	37.9129	180.842	74.1212	159.696	91.6558	7.10648	19.0098	1199.48	14.7057	-22.8242	37.53	7.17032	-9.09035
7509	1.08099e+07	6.95201e+06	0.0833638	-0.0592675	-0.0279327	0.156346	-4.78463	8.70232	-16.1883	486.247	73.3426	21.3596	38.0292	182.966	74.1935	162.922	95.6382	7.05249	20.8607	1058.12	13.7323	-20.1376	33.8699	7.47163	-8.38595
7510	1.09099e+07	6.95201e+06	0.0970982	-0.0478455	-0.0275057	0.170622	-4.07479	7.96397	-14.0357	502.916	75.5582	22.4277	37.1864	186.458	77.1762	176.247	98.6872	7.0327	22.3521	942.765	13.1653	-18.2927	31.458	7.1953	-7.78198
7511	1.10099e+07	6.95201e+06	0.0970982	-0.0478455	-0.0275057	0.170622	NA	NA	NA	NA	NA	NA	NA	NA	NA	NA	NA	NA	NA	NA	NA	NA	NA	NA	NA
7655	-1.06901e+07	6.85201e+06	0.180522	-0.0983004	0.0503698	0.149766	0.0136471	10.395	-9.50728	730.177	135.529	22.4266	55.9575	326.129	88.1714	277.574	112.905	5.6597	20.587	831.923	14.2921	-13.2539	27.546	8.52339	-6.89522
7656	-1.05901e+07	6.85201e+06	0.184924	-0.0888778	0.0233681	0.143477	NA	NA	NA	NA	NA	NA	NA	NA	NA	NA	NA	NA	NA	NA	NA	NA	NA	NA	NA
7657	-1.04901e+07	6.85201e+06	0.196239	-0.0945547	0.021243	0.13922	0.229421	11.2781	-9.82618	632.74	113.701	22.1277	51.4621	273.469	79.8448	235.067	100.541	6.92815	23.3023	874.681	15.9165	-13.8316	29.748	10.4751	-6.31499
7658	-1.03901e+07	6.85201e+06	0.16052	-0.0909963	0.0168982	0.140192	0.0767833	11.25	-10.2682	598.818	103.441	23.9861	47.4376	253.011	83.2643	220.884	99.8281	7.72507	24.948	886.168	16.4508	-14.4882	30.9391	10.3445	-6.41083
7659	-1.02901e+07	6.85201e+06	0.146945	-0.0559038	0.0262927	0.155518	0.172579	11.5884	-10.6432	591.806	99.9576	25.5386	46.3342	249.556	85.6989	216.095	100.648	8.30955	25.8041	913.007	17.2024	-15.0219	32.2243	10.3428	-6.49273
7660	-1.01901e+07	6.85201e+06	0.146945	-0.0559038	0.0262927	0.155518	0.66386	11.842	-9.78612	649.679	105.324	30.2248	45.5405	270.075	98.3422	225.976	115.227	8.27695	26.1703	891.436	17.5089	-14.2529	31.7618	10.0312	-6.17492
7661	-1.00901e+07	6.85201e+06	0.152278	-0.0585467	0.0338515	0.170579	1.0648	11.8612	-8.89269	705.049	109.138	34.62	43.0827	284.852	111.289	227.768	133.745	8.39806	27.1505	857.286	17.6076	-13.5531	31.1607	9.24353	-5.01863
7662	-9.9901e+06	6.85201e+06	0.139095	-0.0551241	0.0227205	0.162154	0.906286	10.9986	-8.07652	746.044	105.76	36.7094	37.5702	281.283	120.376	213.719	163.271	8.6241	29.1324	791.124	16.8746	-13.0295	29.9041	7.11709	-2.35558
7663	-9.8901e+06	6.85201e+06	0.139095	-0.0551241	0.0227205	0.162154	1.33534	10.2502	-6.41362	832.136	111.797	38.4148	34.8114	300.16	127.3	190.03	215.089	8.19069	30.7046	695.177	15.6505	-11.1622	26.8128	4.40618	2.91746
7664	-9.7901e+06	6.85201e+06	0.133481	-0.0354976	0.0276755	0.184284	1.48424	9.87552	-5.79402	970.982	137.553	42.2869	38.0335	361.394	139.285	189.838	258.057	7.54128	30.6305	654.542	14.7443	-10.0019	24.7462	3.33306	4.71559
7665	-9.6901e+06	6.85201e+06	0.145729	-0.0434401	0.0286996	0.178689	NA	NA	NA	NA	NA	NA	NA	NA	NA	NA	NA	NA	NA	NA	NA	NA	NA	NA	NA
7666	-9.5901e+06	6.85201e+06	0.145729	-0.0434401	0.0286996	0.178689	NA	NA	NA	NA	NA	NA	NA	NA	NA	NA	NA	NA	NA	NA	NA	NA	NA	NA	NA
7668	-9.3901e+06	6.85201e+06	0.0951277	-0.0295744	0.0380037	0.202228	NA	NA	NA	NA	NA	NA	NA	NA	NA	NA	NA	NA	NA	NA	NA	NA	NA	NA	NA
7669	-9.2901e+06	6.85201e+06	0.110264	-0.0386612	0.0387488	0.195297	NA	NA	NA	NA	NA	NA	NA	NA	NA	NA	NA	NA	NA	NA	NA	NA	NA	NA	NA
7670	-9.1901e+06	6.85201e+06	0.145365	-0.0423943	0.022505	0.176849	1.26717	9.60212	-6.4443	2493.64	349.227	125.518	33.7934	919.915	424.214	506.25	608.055	7.68447	30.4965	671.391	14.1955	-11.0246	25.2201	1.65998	4.20843
7671	-9.0901e+06	6.85201e+06	0.104618	-0.0476833	0.0226513	0.164496	-0.759825	7.74735	-8.852	2195.41	302.194	112.239	32.6351	795.407	368.835	449.877	542.591	7.75134	29.6571	694.581	12.3475	-13.7793	26.1268	0.442025	2.82368
7672	-8.9901e+06	6.85201e+06	0.0943883	-0.0529509	-0.00225022	0.131497	-2.73951	6.3899	-11.2843	1296.22	167.755	60.8756	32.9579	457.671	202.318	287.667	350.251	8.35868	29.302	739.905	11.6495	-16.8981	28.5476	-1.89042	-1.08297
7673	-8.8901e+06	6.85201e+06	0.103481	-0.0432309	-0.0110058	0.126368	-2.10553	7.98561	-11.4981	892.256	117.572	31.423	37.4563	320.765	116.107	191.261	274.012	9.15968	28.6781	808.432	14.1928	-17.7533	31.9461	-3.68238	-0.594199
7674	-8.7901e+06	6.85201e+06	0.116916	-0.0350718	-0.0113762	0.132863	-1.95226	9.01462	-12.6034	643.723	82.9862	19.6585	36.1924	225.576	82.1876	149.91	199.939	9.54565	27.3593	887.829	15.771	-19.1134	34.8843	-4.57894	-1.11676
7675	-8.6901e+06	6.85201e+06	0.142321	-0.0378923	-0.00499072	0.140513	-1.8574	10.1874	-14.2284	469.674	56.2691	13.7369	33.159	158.907	64.5272	136.926	123.285	10.2799	26.9325	997.118	17.4071	-20.7662	38.1733	5.31629	-2.25057
7676	-8.5901e+06	6.85201e+06	0.142321	-0.0378923	-0.00499072	0.140513	-2.52085	10.2143	-15.6492	483.577	60.8367	15.1062	34.2756	171.414	70.9235	155.524	108.514	11.1292	27.8138	1058.62	17.7554	-22.3069	40.0622	8.60907	-4.93968
7677	-8.4901e+06	6.85201e+06	0.142804	-0.0376945	-0.00469194	0.141991	-3.11307	10.0567	-16.5335	530.039	68.2733	17.8919	34.0255	188.171	79.2778	176.71	112.469	11.3772	27.8536	1090.58	17.572	-23.3332	40.9052	8.67218	-8.22548
7678	-8.3901e+06	6.85201e+06	0.179782	-0.0377991	0.000501104	0.158905	-2.54222	11.7068	-18.1812	482.752	67.7129	17.0404	37.4963	179.247	65.7585	176.867	97.6637	11.6913	26.1652	1221.9	19.2855	-25.5324	44.8179	11.2303	-8.76408
7679	-8.2901e+06	6.85201e+06	0.188581	-0.0467751	-0.00326707	0.151823	-2.38165	12.3571	-18.6964	476.936	74.4477	18.1678	41.9409	191.012	63.3347	190.921	90.7177	11.8449	25.5376	1271.82	20.0687	-26.4701	46.5388	12.3219	-8.63347
7680	-8.1901e+06	6.85201e+06	0.167341	-0.0434651	-0.00575811	0.1504	-2.27257	12.4711	-18.0953	505.848	88.9248	19.9048	50.6152	223.21	65.4057	223.21	82.0821	11.6543	25.5505	1256.3	20.0942	-25.6095	45.7037	12.4711	-9.18767
7681	-8.0901e+06	6.85201e+06	0.164354	-0.044038	0.00552592	0.153519	-1.83403	13.7018	-18.6778	493.426	94.5346	18.6348	59.2436	233.699	59.6529	233.699	66.3441	11.5015	24.406	1331.93	21.332	-25.8392	47.1712	13.7018	-9.97065
7682	-7.9901e+06	6.85201e+06	0.156998	-0.0385322	0.00255941	0.156628	-1.80499	13.9459	-18.6625	469.996	92.4896	18.0898	61.6551	228.17	57.7701	228.17	60.1622	11.902	24.9352	1345.86	21.7859	-25.9793	47.7651	13.9459	-11.2534
7683	-7.8901e+06	6.85201e+06	0.114952	-0.0309293	0.00626448	0.170477	-1.75802	14.1608	-18.6406	431.683	82.7223	17.6954	59.4552	208.204	55.5497	208.204	58.7674	12.8777	26.2745	1357.22	22.5034	-26.5266	49.0301	14.1608	-11.1169
7684	-7.7901e+06	6.85201e+06	0.0867706	-0.0122841	0.00582362	0.18321	-2.12895	13.8781	-19.0563	404.728	73.2397	17.4523	55.2351	189.313	53.8862	189.313	58.2765	13.0562	26.461	1361.94	22.4058	-26.9459	49.3517	13.8781	-10.4035
7685	-7.6901e+06	6.85201e+06	0.0622023	-0.0113424	0.00808322	0.172198	-2.45463	13.74	-19.7846	381.35	64.4339	16.6287	50.5819	170.362	51.8419	170.362	56.188	12.499	25.3191	1381.34	22.0361	-27.3312	49.3673	13.74	-10.556
7686	-7.5901e+06	6.85201e+06	0.060784	-0.0248886	0.00800649	0.146058	-2.67603	13.6784	-20.2316	376.913	60.0877	16.6557	46.8945	161.113	52.7768	161.113	55.8577	12.1278	24.6742	1392.12	21.7673	-27.4128	49.1802	13.6783	-11.207
7687	-7.4901e+06	6.85201e+06	0.060784	-0.0248886	0.00800649	0.146058	-2.37675	14.2934	-20.3532	367.307	57.29	16.0433	45.3337	152.355	51.1119	152.131	54.4591	12.3051	24.6776	1417.43	22.4618	-27.4339	49.8957	14.1008	-11.412
7688	-7.3901e+06	6.85201e+06	0.060725	-0.0230512	0.0140334	0.156182	-2.22497	14.8426	-20.8174	358.976	56.8005	14.6443	46.3032	148.917	46.6848	148.186	53.1304	12.1468	23.8128	1453.94	23.0122	-28.0016	51.0138	14.3621	-10.8832
7689	-7.2901e+06	6.85201e+06	0.0758093	-0.0321048	0.0140763	0.13374	-2.46156	14.8897	-21.4095	367.731	59.0223	14.2462	48.7345	155.928	45.8305	155.527	52.8839	11.3327	22.0404	1477.62	22.6881	-28.7292	51.4173	14.6441	-11.8577
7690	-7.1901e+06	6.85201e+06	0.0931478	-0.0291829	0.0139423	0.139177	-3.01008	14.4724	-21.9146	377.838	60.4521	14.6243	49.0285	160.386	48.5074	160.134	53.8796	10.5497	20.6214	1481.82	21.8062	-29.3584	51.1646	14.29	-13.3942
7691	-7.0901e+06	6.85201e+06	0.106102	-0.00578183	0.00758933	0.157939	-4.08609	13.9987	-23.5092	381.885	59.4294	14.6741	47.5117	159.964	52.0349	159.737	54.2949	10.2405	19.6401	1528.62	21.1509	-31.0141	52.165	13.7708	-18.5338
7692	-6.9901e+06	6.85201e+06	0.10818	-0.0103085	0.0067724	0.155431	-5.1302	13.509	-24.9528	391.01	62.8109	13.807	51.0376	169.311	50.3782	168.465	51.3278	10.241	19.2663	1567.54	20.8987	-32.2705	53.1692	12.9278	-22.2894
7693	-6.8901e+06	6.85201e+06	0.153903	-0.00153433	0.00538779	0.168512	-5.42145	13.149	-24.7427	406.224	67.0905	13.4849	54.027	180.492	48.7445	177.063	49.7832	10.413	19.7467	1542	20.7828	-31.9725	52.7553	11.6779	-21.0468
7694	-6.7901e+06	6.85201e+06	0.146094	-0.0356624	0.00986083	0.153501	-5.75777	12.9203	-24.7964	419.222	67.7275	13.2353	53.8661	185.379	49.3806	179.174	50.1781	10.2749	19.6545	1531.23	20.5312	-31.7471	52.2782	11.0805	-22.5857
7695	-6.6901e+06	6.85201e+06	0.166289	-0.0504901	0.0388663	0.167514	-6.22689	12.7154	-25.33	410.185	66.3861	11.5286	54.8177	180.986	45.7693	173.233	47.4046	10.1514	19.4113	1544.04	20.2871	-32.0055	52.2925	10.8308	-23.7397
7696	-6.5901e+06	6.85201e+06	0.166289	-0.0504901	0.0388663	0.167514	-6.6334	12.4046	-25.8293	390.221	65.0022	9.74332	57.9701	176.568	39.8102	165.841	42.3089	9.96911	19.0844	1554.2	19.9876	-32.2399	52.2274	10.7105	-24.0769
7697	-6.4901e+06	6.85201e+06	0.1659	-0.0529131	0.0462373	0.167339	-7.06278	12.1217	-26.2487	384.17	64.8649	9.51698	60.0944	178.659	37.3534	164.647	39.8968	9.77396	18.7144	1562.34	19.8308	-32.3902	52.221	10.6026	-24.5361
7698	-6.3901e+06	6.85201e+06	0.157699	-0.0505883	0.0317255	0.165347	-7.43336	11.8223	-26.4486	387.816	63.8524	10.483	58.791	179.892	39.0299	165.872	40.903	9.56046	18.3696	1561.31	19.7017	-32.3418	52.0435	10.4971	-24.9479
7699	-6.2901e+06	6.85201e+06	0.184106	-0.047687	0.0317538	0.171553	-7.45654	11.7863	-26.3299	378.771	62.6131	10.9952	57.3906	174.749	39.6143	160.368	41.8217	9.19099	17.7715	1558.09	19.6275	-32.0836	51.7111	10.6088	-25.0378
7700	-6.1901e+06	6.85201e+06	0.185439	-0.0666558	0.0333436	0.146175	-7.62053	11.3627	-26.2423	360.049	61.7169	10.5057	57.2904	166.321	37.7633	151.319	41.1405	8.63437	16.975	1542.98	18.9383	-31.9202	50.8584	10.4962	-25.1606
7701	-6.0901e+06	6.85201e+06	0.186286	-0.0580777	0.0504174	0.179066	NA	NA	NA	NA	NA	NA	NA	NA	NA	NA	NA	NA	NA	NA	NA	NA	NA	NA	NA
7710	-5.1901e+06	6.85201e+06	0.164446	-0.0482791	0.0617178	0.253861	NA	NA	NA	NA	NA	NA	NA	NA	NA	NA	NA	NA	NA	NA	NA	NA	NA	NA	NA
7711	-5.0901e+06	6.85201e+06	0.200892	-0.0884733	0.0724468	0.214093	NA	NA	NA	NA	NA	NA	NA	NA	NA	NA	NA	NA	NA	NA	NA	NA	NA	NA	NA
7712	-4.9901e+06	6.85201e+06	0.200892	-0.0884733	0.0724468	0.214093	-5.89436	9.32308	-22.7515	417.5	62.0662	15.2617	49.445	172.74	47.8037	142.587	47.8051	4.64369	11.2456	1308.07	14.5451	-26.7403	41.2854	5.33299	-22.7458
7713	-4.8901e+06	6.85201e+06	0.200892	-0.0884733	0.0724468	0.214093	-6.07093	9.05945	-22.4496	434.985	62.3937	17.4839	46.4468	175.881	54.807	149.442	55.1135	4.36172	10.847	1286.75	14.0083	-26.194	40.2023	6.23043	-21.3481
7714	-4.7901e+06	6.85201e+06	0.200892	-0.0884733	0.0724468	0.214093	-6.15903	8.96465	-22.1933	438.17	62.3527	18.3633	43.3728	173.534	59.2512	152.804	60.6235	4.22532	10.6378	1273.29	13.9106	-25.8036	39.7142	8.16755	-18.7373
7715	-4.6901e+06	6.85201e+06	0.210174	-0.0531349	0.0850799	0.196776	-6.12169	9.19364	-22.138	421.77	60.89	17.1819	41.1595	164.77	59.7044	149.22	63.0488	4.19561	10.4553	1278.59	14.3475	-25.7731	40.1206	8.77554	-17.6939
7716	-4.5901e+06	6.85201e+06	0.229496	-0.0693958	0.0885089	0.184137	-5.91985	8.73974	-21.6032	392.994	58.033	15.5438	39.9332	152.976	57.2018	140.477	62.4785	4.3834	12.5539	1242.05	13.8605	-25.6018	39.4623	8.48559	-16.9886
7717	-4.4901e+06	6.85201e+06	0.200892	-0.0884733	0.0724468	0.214093	NA	NA	NA	NA	NA	NA	NA	NA	NA	NA	NA	NA	NA	NA	NA	NA	NA	NA	NA
7719	-4.2901e+06	6.85201e+06	0.066504	-0.0656083	0.0841854	0.214617	NA	NA	NA	NA	NA	NA	NA	NA	NA	NA	NA	NA	NA	NA	NA	NA	NA	NA	NA
7720	-4.1901e+06	6.85201e+06	0.066504	-0.0656083	0.0841854	0.214617	-5.73902	6.53717	-18.5345	620.235	82.2239	29.7068	36.7859	238.37	96.3649	226.456	107.228	6.23201	17.6201	1020.27	12.0359	-23.3692	35.4051	6.42227	-12.1689
7765	309904	6.85201e+06	-0.0437501	-0.058679	0.0158083	0.154593	NA	NA	NA	NA	NA	NA	NA	NA	NA	NA	NA	NA	NA	NA	NA	NA	NA	NA	NA
7766	409904	6.85201e+06	-0.00579066	-0.0607291	0.0235499	0.154677	3.65496	10.9848	-2.67979	2159.23	265.336	90.4261	33.8711	754.668	303.094	419.855	643.772	5.61727	27.0621	568.714	15.2117	-5.62445	20.8362	1.25249	5.78754
7767	509904	6.85201e+06	0.016227	-0.0674315	0.0201785	0.143124	1.21423	10.1536	-6.49063	1177.35	136.252	51.4623	27.309	387.385	190.036	285.659	302.036	6.775	26.5221	686.312	15.4669	-9.98426	25.4512	2.25878	-0.0502201
7768	609904	6.85201e+06	0.00682959	-0.0754686	0.0196349	0.120715	3.78852	13.4671	-5.05072	880.582	104.726	42.2709	28.5617	296.225	148.977	256.479	169.741	7.5814	27.0194	753.43	19.4345	-8.53253	27.9671	7.28609	-1.38189
7769	709904	6.85201e+06	-0.046806	-0.0546815	0.0213164	0.130687	5.19786	14.7598	-3.68991	822.788	97.0911	40.79	27.2988	275.216	141.798	233.408	162.898	7.26876	26.1479	750.237	20.464	-7.23218	27.6961	7.0928	-0.180305
7770	809904	6.85201e+06	-0.0424024	-0.0762096	0.0111568	0.123615	4.73317	14.4972	-4.52549	793.887	88.1385	40.941	25.4359	256.048	136.718	235.688	160.876	8.45986	28.6074	770.706	20.9784	-8.52838	29.5068	9.42192	-0.710371
7771	909904	6.85201e+06	-0.0346136	-0.0593925	0.0060343	0.122715	4.78324	14.6262	-4.48522	738.081	82.31	36.9277	25.5543	237.402	126.421	230.322	146.218	8.55225	28.7375	774.906	21.0577	-8.62924	29.687	12.7944	-1.25417
7772	1.0099e+06	6.85201e+06	-0.049629	-0.0592686	0.0171524	0.121913	5.11647	14.9722	-3.98488	686.726	80.3799	33.1683	26.8994	225.638	117.169	221.764	134.909	8.28476	28.2862	769.346	21.3594	-7.92309	29.2825	13.8498	-1.77587
7773	1.1099e+06	6.85201e+06	-0.0603382	-0.0812935	0.0204357	0.104444	5.79887	15.4604	-2.99757	589.123	73.0062	27.9161	29.0483	200.827	99.0944	195.808	114.548	8.05779	28.0677	749.89	21.7118	-6.97299	28.6848	14.3323	-0.770752
7774	1.2099e+06	6.85201e+06	-0.105352	-0.0681709	0.0123473	0.114087	5.97949	15.2286	-2.17051	571.765	70.0446	27.6203	29.1389	191.179	95.596	181.801	114.881	6.93523	25.7862	711.694	20.801	-5.99294	26.794	13.815	0.304968
7775	1.3099e+06	6.85201e+06	-0.0763312	-0.10154	-0.0549265	0.0510032	NA	NA	NA	NA	NA	NA	NA	NA	NA	NA	NA	NA	NA	NA	NA	NA	NA	NA	NA
7776	1.4099e+06	6.85201e+06	-0.0844132	-0.0487601	-0.00662722	0.119886	5.81125	15.0716	-2.46896	618.747	73.5741	30.5768	30.1858	208.618	103.958	170.446	121.246	5.16896	20.0371	718.192	19.3105	-6.12304	25.4336	7.1844	3.34771
7777	1.5099e+06	6.85201e+06	-0.0448906	-0.0540119	0.00232367	0.114508	5.52383	15.5045	-3.53317	657.161	77.6441	32.6125	30.6685	218.965	107.663	187.365	135.362	6.26408	21.9998	778.549	20.6566	-7.65292	28.3095	8.43174	3.09395
7778	1.6099e+06	6.85201e+06	-0.0544963	-0.0555973	0.0026678	0.1111	NA	NA	NA	NA	NA	NA	NA	NA	NA	NA	NA	NA	NA	NA	NA	NA	NA	NA	NA
7779	1.7099e+06	6.85201e+06	-0.0443068	-0.0633387	-0.00124016	0.108061	NA	NA	NA	NA	NA	NA	NA	NA	NA	NA	NA	NA	NA	NA	NA	NA	NA	NA	NA
7780	1.8099e+06	6.85201e+06	-0.0430392	-0.0628057	-0.000871526	0.109837	NA	NA	NA	NA	NA	NA	NA	NA	NA	NA	NA	NA	NA	NA	NA	NA	NA	NA	NA
7781	1.9099e+06	6.85201e+06	-0.0295696	-0.0713591	-0.0104546	0.100514	4.57558	15.623	-6.10414	667.651	83.3636	31.8578	31.9203	234.133	103.682	224.074	126.641	7.31937	22.9727	881.005	21.3971	-10.452	31.8491	13.953	-1.84122
7782	2.0099e+06	6.85201e+06	-0.0601558	-0.0588048	-0.00785425	0.108542	4.2444	15.4558	-6.78744	642.692	79.2801	30.1229	31.4703	224.035	101.157	218.126	121.067	7.55994	23.1214	902.331	21.4501	-11.2063	32.6564	14.0256	-2.1515
7783	2.1099e+06	6.85201e+06	-0.0240184	-0.0714217	-0.00565468	0.104484	3.73942	15.2951	-7.67672	671.679	81.0715	30.6595	29.8569	228.571	107.564	220.955	129.403	8.09655	23.6731	932.915	21.7119	-12.4696	34.1815	13.7836	-2.805
7784	2.2099e+06	6.85201e+06	0.00894706	-0.0709609	-0.0138089	0.102766	3.23163	15.1655	-8.81615	716.664	84.3869	34.3421	27.7754	238.15	117.251	234.431	142.989	8.38583	23.523	969.016	21.8631	-13.81	35.6731	13.717	-3.08885
7785	2.3099e+06	6.85201e+06	0.0254408	-0.0677816	-0.0242017	0.105074	2.88895	15.1427	-9.542	674.824	84.2383	32.1147	30.8579	235.617	106.135	235.394	126.284	8.41603	22.9319	995.815	21.9482	-14.7502	36.6985	14.9154	-4.52748
7786	2.4099e+06	6.85201e+06	0.0293407	-0.0613669	-0.0261459	0.111076	2.93304	15.3197	-9.35336	612.316	79.3472	27.0366	34.6052	225.066	90.3428	225.066	106.049	7.97979	22.1016	995.244	21.8924	-14.1823	36.0747	15.3197	-6.93055
7787	2.5099e+06	6.85201e+06	0.0398372	-0.0664697	-0.0224428	0.108954	2.74341	15.2157	-9.68361	580.497	76.6346	25.0926	36.1606	218.786	84.2101	218.786	98.1507	7.61015	21.11	1006.31	21.7127	-14.3282	36.0409	15.2157	-7.21969
7788	2.6099e+06	6.85201e+06	0.0394911	-0.0718104	-0.0277682	0.117067	2.42937	15.0213	-10.1903	586.502	76.9938	26.2918	34.8109	218.35	87.7048	218.35	102.43	7.99355	21.6931	1017.97	21.6328	-15.2061	36.8389	15.0213	-8.12764
7789	2.7099e+06	6.85201e+06	0.0284612	-0.066586	-0.0317895	0.119497	2.41258	15.1804	-10.3625	610.803	77.2847	29.0623	31.2649	218.994	96.8504	218.994	112.514	8.36843	22.2813	1030.36	22.0684	-15.4859	37.5543	15.1804	-7.53001
7790	2.8099e+06	6.85201e+06	0.0166156	-0.0620842	-0.0317326	0.12183	2.37088	15.1918	-10.5482	608.955	77.2554	28.2376	31.6783	218.709	95.7541	218.709	112.535	8.27748	21.9204	1037.7	22.1413	-15.6145	37.7558	15.1918	-6.04615
7791	2.9099e+06	6.85201e+06	0.0175793	-0.0556064	-0.0333355	0.126707	2.18508	15.1482	-10.8658	597.962	76.3695	26.6481	33.3893	218.621	90.2798	218.621	108.713	8.33361	21.8093	1048.76	22.0801	-16.1327	38.2128	15.1482	-4.79502
7792	3.0099e+06	6.85201e+06	0.010431	-0.0591453	-0.0304452	0.12807	1.94155	15.2732	-11.519	586.832	74.9117	25.5066	33.8803	213.455	85.6654	213.455	105.154	8.49107	21.5408	1079.96	22.2834	-17.1462	39.4296	15.2732	-4.24115
7793	3.1099e+06	6.85201e+06	-0.00210093	-0.0517692	-0.0235683	0.135125	1.7923	15.2188	-11.8504	607.294	79.0166	25.9443	34.692	218.988	86.013	218.988	105.743	8.39847	21.2003	1090.99	22.2048	-17.4105	39.6153	15.2188	-4.37307
7794	3.2099e+06	6.85201e+06	-0.013376	-0.0534374	-0.0241712	0.135783	1.83632	15.3156	-11.8575	613.929	81.888	26.4045	35.2213	220.393	86.3218	220.393	106.725	8.21509	20.9458	1094.83	22.2951	-16.918	39.2131	15.3155	-4.35713
7795	3.3099e+06	6.85201e+06	-0.0248858	-0.0626453	-0.0182543	0.124104	1.51901	15.2662	-12.4268	604.859	80.9357	26.1798	34.9731	217.528	85.8336	217.528	106.148	8.817	21.6954	1116.7	22.539	-18.0641	40.6031	15.2662	-4.85383
7796	3.4099e+06	6.85201e+06	-0.0248858	-0.0626453	-0.0182543	0.124104	1.20567	15.0652	-12.9672	607.286	78.3337	26.929	32.9804	215.648	88.997	215.648	108.478	9.17566	22.204	1129.48	22.4821	-18.8388	41.3209	15.0652	-5.16216
7797	3.5099e+06	6.85201e+06	-0.0353357	-0.047389	-0.015924	0.155474	1.14546	15.1235	-13.0464	589.599	77.7625	25.5176	33.4001	212.684	87.2541	212.684	105.077	8.70365	21.3983	1134.98	22.2621	-18.4099	40.672	15.1235	-5.08712
7798	3.6099e+06	6.85201e+06	-0.0347085	-0.0438805	-0.0121555	0.169585	1.1281	15.434	-13.337	620.135	80.9218	27.0622	32.8568	219.772	91.6633	219.736	114.756	8.17606	20.134	1160.58	22.3169	-18.3019	40.6189	15.3879	-4.85571
7799	3.7099e+06	6.85201e+06	-0.0229949	-0.0492647	-0.0088546	0.166182	0.613649	15.2577	-14.1504	709.097	86.9438	31.4622	30.8376	243.291	107.439	240.967	132.598	8.09986	19.2975	1189.03	22.4403	-19.5254	41.9657	13.7195	-5.74325
7800	3.8099e+06	6.85201e+06	-0.0447394	-0.0456155	-0.0111737	0.166103	-0.458997	14.0543	-15.0461	727.81	97.6949	30.2428	36.3359	267.466	106.823	263.608	122.259	8.61485	20.1281	1172.57	21.7049	-21.0576	42.7625	12.4287	-11.0756
7801	3.9099e+06	6.85201e+06	-0.019547	-0.0574539	-0.0114221	0.149798	0.183646	14.8996	-15.1105	570.009	93.5238	20.4638	49.8572	241.352	72.0895	240.85	80.8947	9.44526	21.5955	1206.99	22.4923	-21.214	43.7062	14.6671	-12.303
7802	4.0099e+06	6.85201e+06	-0.00871033	-0.0558386	-0.0121021	0.15424	0.829486	15.9211	-15.0159	505.516	85.7395	16.4927	54.5465	226.534	57.9101	226.534	65.965	9.42848	21.3336	1245.01	23.3533	-20.8454	44.1987	15.9207	-12.1292
7803	4.1099e+06	6.85201e+06	-0.0322471	-0.0460466	-0.0150374	0.160433	0.714252	16.0977	-15.3317	512.03	82.6768	16.6866	52.2398	223.579	60.162	223.573	69.7749	9.28164	20.7768	1264.61	23.6134	-21.0357	44.6492	16.0835	-12.6152
7804	4.2099e+06	6.85201e+06	-0.0322471	-0.0460466	-0.0150374	0.160433	0.29546	16.0868	-16.2612	511.392	79.5527	17.3554	49.6344	217.246	61.8202	217.105	72.2213	9.69484	21.0684	1299.19	23.776	-22.2403	46.0163	15.7588	-13.3766
7805	4.3099e+06	6.85201e+06	-0.0322471	-0.0460466	-0.0150374	0.160433	-0.0956624	16.0704	-16.9827	506.817	77.9471	17.6314	48.5157	213.267	61.6833	213.245	72.5186	9.63342	20.6778	1328.59	23.7088	-22.898	46.6068	16.0182	-13.9357
7806	4.4099e+06	6.85201e+06	-0.00904153	-0.0419227	-0.0167142	0.170738	-0.331574	16.1948	-17.411	513.97	77.5906	18.1066	47.1805	213.998	63.3543	213.998	75.6117	9.48666	20.1075	1351.07	23.7604	-23.4384	47.1988	16.1948	-12.4197
7807	4.5099e+06	6.85201e+06	-0.00914311	-0.045609	-0.020849	0.155732	-0.508057	15.8928	-17.4622	512.913	75.8994	18.3617	46.553	212.918	63.7482	212.918	75.071	9.74578	20.7462	1338.91	23.6034	-23.377	46.9805	15.8928	-12.4473
7808	4.6099e+06	6.85201e+06	-0.00914311	-0.045609	-0.020849	0.155732	-0.960525	15.2589	-17.6645	512.891	75.2559	18.1054	46.6774	213.958	62.9171	213.958	73.6741	10.4353	22.0574	1323.55	23.5677	-23.7375	47.3052	15.2589	-13.1689
7809	4.7099e+06	6.85201e+06	-0.0176961	-0.058794	-0.0247909	0.15401	-1.15207	15.2411	-17.8609	527.372	77.2131	18.8282	45.6058	217.626	64.8272	217.626	77.9399	10.8097	22.5237	1331.63	23.8852	-24.1087	47.994	15.2411	-12.1898
7810	4.8099e+06	6.85201e+06	-0.0160992	-0.0656588	-0.0146405	0.159689	-1.23897	15.2434	-18.0198	550.986	81.6874	20.0354	44.299	224.447	69.0374	224.447	84.1143	10.487	21.9227	1335.55	23.6183	-24.1927	47.811	15.2434	-13.7098
7811	4.9099e+06	6.85201e+06	-0.0160992	-0.0656588	-0.0146405	0.159689	-1.41178	15.2222	-18.3984	548.323	84.9738	19.5055	46.0106	228.047	67.6679	228.047	82.5659	9.88294	20.886	1346.69	23.1871	-24.1236	47.3108	15.2222	-13.0681
7812	5.0099e+06	6.85201e+06	-0.0176961	-0.058794	-0.0247909	0.15401	-1.43108	15.4043	-18.5494	531.732	85.0976	17.7921	48.8163	227.192	62.4531	227.192	76.5501	9.82519	20.5859	1360.71	23.3509	-24.3799	47.7308	15.4043	-12.6162
7813	5.1099e+06	6.85201e+06	-0.0176961	-0.058794	-0.0247909	0.15401	-1.30506	15.8402	-18.4937	526.127	81.1882	16.8847	48.2132	221.778	60.736	221.778	75.0232	9.90166	20.4669	1379.46	23.8005	-24.585	48.3856	15.8402	-14.9994
7814	5.2099e+06	6.85201e+06	-0.0302925	-0.060629	-0.0236517	0.148755	-1.47842	15.9546	-18.8085	529.791	78.5589	16.7548	46.4993	217.911	61.8641	217.911	77.1251	9.88907	20.2015	1398	23.9712	-24.9872	48.9584	15.9546	-15.9073
7815	5.3099e+06	6.85201e+06	-0.018169	-0.0592758	-0.025408	0.149519	-1.89089	15.7215	-19.4699	544.395	77.9825	18.0717	44.2414	217.207	65.7797	217.205	81.228	10.2018	20.491	1414.6	24.0399	-25.7298	49.7697	15.7186	-16.628
7816	5.4099e+06	6.85201e+06	-0.026331	-0.0547371	-0.0197329	0.154505	-2.33139	15.334	-20.0359	564.254	77.304	20.3719	41.3161	217.488	71.7847	217.468	87.5119	10.5986	21.0496	1418.71	24.0247	-26.3178	50.3425	15.2904	-16.4225
7817	5.5099e+06	6.85201e+06	-0.0249352	-0.0616821	-0.00914796	0.160361	-2.51191	15.2496	-20.2293	570.36	75.9134	21.7707	38.8049	213.514	75.0404	213.5	92.7864	10.464	20.7632	1422.82	23.9978	-26.3984	50.3961	15.2189	-12.4142
7818	5.6099e+06	6.85201e+06	-0.0165852	-0.0661539	-0.0152746	0.155074	-2.50568	15.3174	-20.2004	564.539	74.6255	21.6387	37.9081	207.957	73.396	207.935	94.5408	10.2167	20.3248	1426.11	24.0343	-26.2356	50.2699	15.2751	-10.8899
7819	5.7099e+06	6.85201e+06	-0.00677781	-0.063267	-0.0111929	0.150487	-2.36448	15.6096	-20.129	561.014	74.1384	21.0149	37.3164	203.538	72.1335	203.401	96.3762	10.0856	19.9724	1436.78	24.3915	-26.1198	50.5113	15.3778	-10.6567
7820	5.8099e+06	6.85201e+06	0.00605021	-0.0689912	-0.00739611	0.147049	-2.21273	15.7576	-20.2109	554.891	73.8107	20.1728	37.4779	200.631	71.0391	200.492	94.2241	9.92803	19.5434	1444.98	24.5243	-26.2937	50.8181	15.5458	-10.9668
7821	5.9099e+06	6.85201e+06	0.00535589	-0.0757745	-0.00323672	0.139051	-2.75718	15.1047	-20.8554	551.345	74.614	20.0457	37.6746	199.699	71.0342	199.677	91.1438	10.3514	20.0212	1447.45	24.4272	-27.275	51.7023	15.0595	-14.0025
7822	6.0099e+06	6.85201e+06	0.0169118	-0.0727941	-0.00824406	0.125747	-3.90971	13.9109	-22.0203	547.52	75.6354	20.1093	37.6727	199.121	70.9722	199.12	88.4514	11.3929	21.7487	1445.12	23.6746	-28.6904	52.365	13.9088	-18.0119
7823	6.1099e+06	6.85201e+06	0.0294306	-0.0714348	-0.0088963	0.129928	-5.22716	13.0828	-24.2855	527.919	74.7464	19.4662	38.3076	194.745	68.3413	194.644	83.4112	11.9796	22.2282	1498.13	22.8201	-31.0602	53.8802	12.9374	-21.0387
7824	6.2099e+06	6.85201e+06	0.047701	-0.0714606	-0.000511316	0.135562	-5.18306	13.4909	-24.8999	487.649	71.2171	17.8416	39.7842	183.131	62.2705	182.518	75.539	11.6212	21.3341	1538.45	22.9532	-31.5151	54.4683	12.6861	-21.4529
7825	6.3099e+06	6.85201e+06	0.0408939	-0.0663072	0.00196687	0.140226	-5.03079	14.0534	-25.2556	448.23	68.0294	15.7014	42.5868	174.042	54.9197	173.142	66.1414	11.5993	20.9949	1577.38	23.4793	-31.775	55.2543	12.583	-21.7108
7826	6.4099e+06	6.85201e+06	0.0508519	-0.0781221	0.0094809	0.140332	-4.59589	15.286	-25.7566	404.717	64.3891	13.2564	46.3182	164.587	46.5316	164.369	56.222	11.406	20.0217	1649.69	24.6993	-32.3216	57.0208	14.8396	-22.2327
7827	6.5099e+06	6.85201e+06	0.047701	-0.0714606	-0.000511316	0.135562	-4.24004	16.065	-25.845	377.819	61.5885	11.734	48.4723	158.832	41.5121	158.827	51.033	11.5189	19.8211	1685.08	25.4141	-32.6871	58.1012	16.0524	-22.3179
7828	6.6099e+06	6.85201e+06	0.0425643	-0.0729548	0.00225483	0.142637	-4.62425	15.4001	-25.7598	380.313	60.6422	11.5907	48.0596	160.027	41.5045	160.027	51.2673	12.5368	21.3946	1656.52	24.8763	-33.6703	58.5465	15.4001	-22.2536
7829	6.7099e+06	6.85201e+06	0.0613757	-0.0827951	0.0108825	0.150981	-5.49327	14.2695	-26.4126	388.205	60.295	11.883	47.4879	163.1	42.7112	163.1	52.12	13.7521	23.2853	1637.63	24.1993	-34.8082	59.0075	14.2695	-22.9555
7830	6.8099e+06	6.85201e+06	0.065169	-0.0903266	0.0220239	0.156576	-6.10553	13.805	-27.0833	390.675	60.4529	11.99	48.2681	165.352	42.7452	165.352	52.2921	14.4471	24.2386	1647.13	24.0648	-35.5263	59.5911	13.805	-23.783
7831	6.9099e+06	6.85201e+06	0.065169	-0.0903266	0.0220239	0.156576	-6.29846	13.7801	-27.1278	391.338	60.8693	12.0997	48.8699	166.718	42.8487	166.718	51.9435	14.3356	24.0757	1650.71	23.847	-35.7045	59.5515	13.7801	-24.0663
7832	7.0099e+06	6.85201e+06	0.065008	-0.0914829	0.0108105	0.151913	-6.09299	14.1755	-26.9843	378.847	58.9217	11.7691	49.4158	162.443	41.4874	162.443	50.5712	13.7644	23.339	1662.66	23.7797	-35.1915	58.9712	14.1755	-23.9514
7833	7.1099e+06	6.85201e+06	0.065008	-0.0914829	0.0108105	0.151913	-5.93497	14.381	-26.905	377.368	58.9721	11.7456	50.2287	162.835	40.9834	162.835	50.9912	12.9936	22.3447	1669.15	23.7292	-34.415	58.1442	14.381	-23.4824
7834	7.2099e+06	6.85201e+06	0.0911299	-0.0947784	0.00905225	0.152241	-5.77558	14.4876	-26.8017	393.446	61.4136	12.4183	49.4158	168.23	43.1121	168.23	56.0248	12.3358	21.4818	1672.55	23.8462	-33.5656	57.4119	14.4876	-20.1912
7835	7.3099e+06	6.85201e+06	0.0959642	-0.0845508	-0.00356142	0.146053	-5.45199	14.718	-26.3798	410.008	64.0638	12.2531	49.1169	173.902	42.8063	173.902	62.2991	11.6691	20.546	1666.38	23.8163	-32.9629	56.7792	14.718	-15.4875
7836	7.4099e+06	6.85201e+06	0.0959642	-0.0845508	-0.00356142	0.146053	-5.45496	14.6858	-26.0307	418.491	67.7262	11.8979	53.4588	184.849	40.515	184.849	60.5189	11.1092	19.8777	1649.55	23.4924	-32.3818	55.8742	14.6858	-14.4577
7837	7.5099e+06	6.85201e+06	0.0969851	-0.0832019	0.00725273	0.150553	-6.33087	13.8744	-26.4476	413.409	75.2715	10.6753	65.3633	204.115	36.5493	204.115	47.693	11.045	20.0737	1634.99	22.7168	-32.2832	55	13.8744	-17.7285
7838	7.6099e+06	6.85201e+06	0.122775	-0.0746369	0.00226077	0.150496	-6.6521	13.6357	-27.1268	374.492	78.2722	8.06635	76.2936	202.57	28.9302	202.57	34.0317	11.9486	21.1959	1655.05	22.8013	-33.5416	56.343	13.6357	-22.8387
7839	7.7099e+06	6.85201e+06	0.121057	-0.0762173	-0.00841846	0.145997	-6.4126	14.0881	-27.6577	334.999	72.2339	6.72754	77.9645	184.299	24.4136	184.299	29.2147	12.4823	21.4987	1697.87	23.3204	-34.7878	58.1082	14.0881	-22.4463
7840	7.8099e+06	6.85201e+06	0.121057	-0.0762173	-0.00841846	0.145997	-6.58824	14.5619	-28.8028	328.911	65.9599	7.34963	72.2223	172.385	26.5896	172.385	33.05	12.2877	20.6638	1767.18	23.6505	-35.8579	59.5085	14.5619	-22.0734
7841	7.9099e+06	6.85201e+06	0.128363	-0.0681391	-0.00802002	0.153981	-7.36266	14.3902	-30.2128	352.925	65.425	8.73104	67.0282	176.443	31.5878	176.443	38.4634	12.2999	20.2969	1819.95	23.671	-36.9502	60.6212	14.3902	-23.4285
7842	8.0099e+06	6.85201e+06	0.125328	-0.083425	0.00820363	0.166288	-7.96682	14.2055	-31.2002	389.783	67.6572	10.4593	62.9184	188.083	37.7312	188.083	43.3588	12.1558	19.8729	1854.76	23.6265	-37.5383	61.1648	14.2055	-26.2866
7843	8.1099e+06	6.85201e+06	0.125328	-0.083425	0.00820363	0.166288	-8.20055	14.0474	-31.246	426.237	71.5606	11.8029	62.0664	203.599	42.0184	203.599	46.4072	11.7558	19.4039	1852.48	23.2382	-37.3088	60.547	14.0474	-27.2394
7844	8.2099e+06	6.85201e+06	0.114223	-0.0772574	0.00430106	0.170864	-8.62558	13.9451	-32.1803	430.28	71.8237	11.8679	63.2989	206.931	42.2269	206.931	46.1464	12.713	20.3976	1888.67	23.3672	-38.7962	62.1633	13.9451	-28.0513
7845	8.3099e+06	6.85201e+06	0.114223	-0.0772574	0.00430106	0.170864	-9.30407	13.918	-33.9504	389.889	67.2804	9.83079	67.184	194.179	35.4612	194.179	40.114	14.206	21.7966	1962.92	23.8508	-41.2593	65.1101	13.918	-29.1137
7846	8.4099e+06	6.85201e+06	0.0950503	-0.0652547	0.0089601	0.182848	-9.56957	14.0923	-34.7851	354.297	62.3225	8.1854	68.6534	179.536	30.3304	179.536	35.7928	14.5626	22.0157	2008.5	24.139	-42.036	66.175	14.0923	-28.1057
7847	8.5099e+06	6.85201e+06	0.0950503	-0.0652547	0.0089601	0.182848	-9.2776	14.6622	-34.8043	343.373	60.6468	7.61378	67.6819	171.518	28.673	171.518	35.2422	13.9696	21.1446	2037.54	24.5271	-41.5838	66.1109	14.6622	-26.4087
7848	8.6099e+06	6.85201e+06	0.0759726	-0.0672957	0.00926777	0.175477	-8.82316	15.4565	-34.9948	336.221	59.8679	6.97334	67.3819	165.922	27.0856	165.91	33.7795	13.115	19.7647	2080.04	25.0441	-41.3766	66.4208	15.4206	-27.192
7849	8.7099e+06	6.85201e+06	0.0886199	-0.0739673	0.0131371	0.170614	-8.90186	15.6315	-35.627	331.537	59.8993	6.32471	68.609	163.666	25.0162	163.432	30.9647	12.5581	18.8021	2113	25.0116	-41.826	66.8376	15.0813	-29.1605
7850	8.8099e+06	6.85201e+06	0.103692	-0.0799232	0.0151067	0.150165	-9.54464	14.855	-35.9419	350.022	64.6906	6.5452	70.8462	175.279	24.7133	174.334	29.1054	12.1247	18.3284	2092.56	24.1321	-42.0456	66.1777	13.2823	-30.4081
7851	8.9099e+06	6.85201e+06	0.110253	-0.072586	0.011537	0.159758	-10.2726	13.644	-35.5508	382.377	72.5994	7.31619	72.9979	195.036	26.5356	193.165	30.1365	11.7632	18.2826	2025.58	22.8907	-41.4907	64.3814	11.6745	-30.4138
7852	9.0099e+06	6.85201e+06	0.106078	-0.074386	0.0151712	0.168852	-10.0916	12.5798	-33.5519	410.186	79.4867	7.85278	74.8114	213.468	27.7992	208.564	31.4234	11.4122	18.8101	1899.61	21.364	-39.4221	60.7862	10.1823	-28.9395
7853	9.1099e+06	6.85201e+06	0.107542	-0.0725508	0.0279225	0.174627	-9.26582	11.5557	-30.2802	445.802	85.0522	8.49813	74.0455	231.985	29.4177	221.742	33.0637	11.1959	20.1085	1723.38	19.6106	-36.2258	55.8364	9.53004	-26.3593
7854	9.2099e+06	6.85201e+06	0.10174	-0.07144	0.0121224	0.168227	-7.76242	11.3759	-26.7562	465.362	84.6805	8.67111	71.2197	237.022	30.0061	221.346	34.5572	11.1752	21.6823	1573.1	18.7304	-32.8814	51.6118	9.8157	-23.356
7855	9.3099e+06	6.85201e+06	0.0971995	-0.0657497	-0.0144728	0.140707	-6.73994	11.3429	-24.5441	472.159	80.8415	9.4725	66.4793	230.72	33.483	211.703	39.03	10.9976	22.4605	1485.14	18.3501	-30.5017	48.8518	10.1639	-21.4964
7856	9.4099e+06	6.85201e+06	0.0971995	-0.0657497	-0.0144728	0.140707	-6.45618	11.3669	-23.8661	481.094	76.7034	10.9498	60.1996	220.958	40.4777	201.449	47.9539	11.3417	23.3654	1459.9	18.6792	-29.6566	48.3358	10.2199	-21.0056
7857	9.5099e+06	6.85201e+06	0.108479	-0.0720743	-0.0101328	0.137152	-6.57809	11.4662	-24.1259	516.981	76.6371	12.8958	53.5716	220.237	51.0112	194.868	61.9405	11.3657	23.4036	1473.06	18.7337	-29.8387	48.5724	8.67671	-21.493
7858	9.6099e+06	6.85201e+06	0.0859277	-0.0820709	-0.00310712	0.14031	-6.4692	11.6293	-24.0379	566.238	85.705	14.6135	50.8449	235.435	60.3126	194.529	73.9896	10.965	22.528	1479.62	18.7268	-29.8034	48.5301	5.74914	-21.6688
7859	9.7099e+06	6.85201e+06	0.0739653	-0.0760492	-0.00723417	0.143961	-6.40171	11.2096	-23.1211	568.595	90.5884	14.798	52.0172	239.299	60.2847	193.417	74.2525	10.3446	22.0511	1429.34	17.9647	-28.6655	46.6302	5.82559	-20.9186
7860	9.8099e+06	6.85201e+06	0.0627747	-0.084045	-0.00242234	0.14995	-5.54671	10.3388	-20.2381	471.652	75.862	12.3827	54.4617	204.433	47.3562	177.577	60.3842	7.7827	19.1383	1279.58	15.8795	-24.5173	40.3967	7.49649	-17.5857
7861	9.9099e+06	6.85201e+06	0.0630794	-0.0828377	-0.00764402	0.150222	-4.90737	9.73414	-18.3606	423.024	63.4955	13.4026	50.7772	178.339	46.7934	159.576	64.0122	6.54893	17.7471	1182.44	14.8043	-22.1326	36.9369	8.36384	-13.5015
7862	1.00099e+07	6.85201e+06	0.0551888	-0.0744243	0.00214278	0.175308	-3.97528	9.46691	-16.302	444.26	64.115	15.7281	48.3974	182.665	52.2678	163.674	72.398	6.19434	19.0704	1087.54	14.2317	-20.1259	34.3576	6.63059	-10.0927
7863	1.01099e+07	6.85201e+06	0.0551888	-0.0744243	0.00214278	0.175308	NA	NA	NA	NA	NA	NA	NA	NA	NA	NA	NA	NA	NA	NA	NA	NA	NA	NA	NA
7864	1.02099e+07	6.85201e+06	0.0390685	-0.0682121	0.00348171	0.180744	NA	NA	NA	NA	NA	NA	NA	NA	NA	NA	NA	NA	NA	NA	NA	NA	NA	NA	NA
7866	1.04099e+07	6.85201e+06	0.0223933	-0.0286776	-0.0280901	0.22267	NA	NA	NA	NA	NA	NA	NA	NA	NA	NA	NA	NA	NA	NA	NA	NA	NA	NA	NA
7867	1.05099e+07	6.85201e+06	0.078365	-0.047875	-0.00621812	0.193504	-3.28802	10.292	-15.9011	573.156	74.737	28.9834	30.637	196.574	92.4867	172.162	129.851	7.5641	20.7985	1092.93	15.9843	-20.4154	36.3997	5.90182	-6.24347
7868	1.06099e+07	6.85201e+06	0.0873961	-0.0565122	-0.0097159	0.184279	-4.01849	9.84782	-16.4244	595.715	78.0714	30.5736	31.6794	209.92	98.0584	183.725	126.31	7.54151	20.721	1103.49	15.6382	-20.8262	36.4643	5.08042	-7.46239
7869	1.07099e+07	6.85201e+06	0.0873961	-0.0565122	-0.0097159	0.184279	NA	NA	NA	NA	NA	NA	NA	NA	NA	NA	NA	NA	NA	NA	NA	NA	NA	NA	NA
7870	1.08099e+07	6.85201e+06	0.0713577	-0.0501208	-0.0160388	0.192044	NA	NA	NA	NA	NA	NA	NA	NA	NA	NA	NA	NA	NA	NA	NA	NA	NA	NA	NA
7871	1.09099e+07	6.85201e+06	0.0970982	-0.0478455	-0.0275057	0.170622	NA	NA	NA	NA	NA	NA	NA	NA	NA	NA	NA	NA	NA	NA	NA	NA	NA	NA	NA
7872	1.10099e+07	6.85201e+06	0.0970982	-0.0478455	-0.0275057	0.170622	NA	NA	NA	NA	NA	NA	NA	NA	NA	NA	NA	NA	NA	NA	NA	NA	NA	NA	NA
7873	1.11099e+07	6.85201e+06	0.0889716	-0.0545726	0.017377	0.208669	NA	NA	NA	NA	NA	NA	NA	NA	NA	NA	NA	NA	NA	NA	NA	NA	NA	NA	NA
8015	-1.07901e+07	6.75201e+06	0.167138	-0.0931701	0.0461095	0.156705	NA	NA	NA	NA	NA	NA	NA	NA	NA	NA	NA	NA	NA	NA	NA	NA	NA	NA	NA
8016	-1.06901e+07	6.75201e+06	0.159234	-0.0807835	0.0206304	0.156072	1.27655	10.8056	-7.21186	777.547	136.579	23.5682	51.6124	335.453	94.149	274.184	125.834	5.79768	22.8221	755.807	14.5961	-10.8261	25.4222	7.54715	-4.74462
8017	-1.05901e+07	6.75201e+06	0.185004	-0.0898723	0.016354	0.144953	1.40774	11.3861	-7.78658	636.496	105.146	23.7103	45.1097	261.191	87.3687	220.799	110.823	7.03207	25.4157	795.745	15.8953	-11.7901	27.6853	9.86288	-4.59498
8018	-1.04901e+07	6.75201e+06	0.185004	-0.0898723	0.016354	0.144953	1.35424	11.5502	-8.23609	602.975	92.7915	26.2828	40.5266	238.357	90.7283	201.17	109.575	7.78214	26.9439	816.65	16.5805	-12.3689	28.9494	10.1591	-5.04374
8019	-1.03901e+07	6.75201e+06	0.185004	-0.0898723	0.016354	0.144953	1.2677	11.1624	-7.93862	691.508	98.1177	34.1409	37.2992	261.373	112.226	215.704	131.325	7.85956	27.8046	790.62	16.2619	-12.122	28.3838	8.92182	-5.07246
8020	-1.02901e+07	6.75201e+06	0.152628	-0.0791793	0.022593	0.15662	1.44766	10.6791	-6.75167	918.616	118.254	50.485	31.755	322.786	165.661	255.3	197.646	7.54335	28.6564	726.867	15.6766	-10.8564	26.533	7.31289	-3.10176
8021	-1.01901e+07	6.75201e+06	0.140478	-0.0717123	0.0185007	0.161686	2.23467	10.6879	-5.12304	1103.45	133.073	62.5429	26.727	366.29	209.822	279.565	267.792	7.44483	30.2336	660.17	15.7377	-9.13965	24.8774	6.5293	0.169816
8023	-9.9901e+06	6.75201e+06	0.120622	-0.0264128	0.0237714	0.190374	NA	NA	NA	NA	NA	NA	NA	NA	NA	NA	NA	NA	NA	NA	NA	NA	NA	NA	NA
8024	-9.8901e+06	6.75201e+06	0.120622	-0.0264128	0.0237714	0.190374	NA	NA	NA	NA	NA	NA	NA	NA	NA	NA	NA	NA	NA	NA	NA	NA	NA	NA	NA
8031	-9.1901e+06	6.75201e+06	0.0953979	-0.0328633	0.0183419	0.165793	NA	NA	NA	NA	NA	NA	NA	NA	NA	NA	NA	NA	NA	NA	NA	NA	NA	NA	NA
8032	-9.0901e+06	6.75201e+06	0.0731435	-0.0298312	-0.00508783	0.149399	2.19167	9.62367	-4.51112	1944.88	278.641	85.8547	37.844	723.896	286.307	347.972	532.571	6.19204	27.5772	591.816	13.9377	-8.51053	22.4482	1.5303	5.93432
8033	-8.9901e+06	6.75201e+06	0.0829515	-0.0363993	-0.00677023	0.1449	1.54514	9.56827	-5.84674	1567.86	225.872	67.9649	39.0409	585.405	220.931	286.566	450.965	7.16742	28.7196	640.598	14.6404	-10.3455	24.9859	0.216402	4.98121
8034	-8.8901e+06	6.75201e+06	0.117766	-0.0520877	-0.00650191	0.140439	-0.604372	8.43993	-9.12727	1203.94	161.998	48.4828	35.8085	429.586	171.109	241.819	350.335	7.97221	28.3129	726.897	14.0744	-14.1277	28.2021	-1.53656	2.73178
8035	-8.7901e+06	6.75201e+06	0.153346	-0.0421857	-0.01078	0.132523	-0.800564	9.96134	-11.4243	737.14	91.3285	26.5901	32.1157	248.671	108.402	181.566	203.277	9.5146	28.339	877.029	16.6972	-16.8232	33.5204	3.24998	-0.618081
8036	-8.6901e+06	6.75201e+06	0.145422	-0.0421894	-0.0102167	0.136548	-1.77527	9.95218	-13.607	565.673	68.9308	18.172	32.4255	194.998	81.7676	172.756	135.909	10.7592	29.2371	965.444	17.2453	-19.5592	36.8044	7.96666	-4.60098
8037	-8.5901e+06	6.75201e+06	0.136488	-0.0435579	-0.00575912	0.142964	-2.81961	9.36524	-14.9269	586.744	73.6781	18.8335	33.6552	206.559	84.6216	194.153	128.013	10.8271	28.5333	995.588	16.6693	-21.2898	37.959	8.01908	-7.46909
8038	-8.4901e+06	6.75201e+06	0.153156	-0.0337069	-0.00626568	0.157497	-2.70762	9.89565	-15.5243	565.099	77.5023	19.26	36.0561	205.98	78.2288	202.947	118.855	10.9934	27.7591	1041.32	17.1865	-22.4623	39.6488	9.3092	-8.30594
8039	-8.3901e+06	6.75201e+06	0.167789	-0.031695	-0.00713341	0.160778	-2.92936	9.76689	-15.6445	574.604	91.9025	20.5377	43.9114	235.259	75.9462	235.19	106.854	11.1706	28.1689	1046.99	17.022	-22.7647	39.7867	9.74352	-8.7939
8040	-8.2901e+06	6.75201e+06	0.159984	-0.0393822	-0.00344785	0.153059	-1.832	11.2143	-14.8643	573.661	107.572	20.6371	58.4205	269.989	69.2846	269.989	82.7103	11.3562	28.2409	1079.71	18.4496	-21.8764	40.326	11.2143	-9.09265
8041	-8.1901e+06	6.75201e+06	0.152695	-0.0338957	-0.00655088	0.156087	-0.499713	13.9114	-15.9101	513.462	103.657	18.259	65.3011	255.561	59.1606	255.561	61.6462	11.5721	26.0511	1230.87	21.3738	-23.134	44.5077	13.9114	-11.2175
8042	-8.0901e+06	6.75201e+06	0.113692	-0.0200061	0.00119158	0.168626	-0.600203	14.5692	-17.2806	453.093	90.5466	18.2481	62.2891	222.232	57.1944	222.232	58.9529	12.0522	25.4186	1313.76	22.3994	-25.0287	47.4281	14.5692	-9.77976
8043	-7.9901e+06	6.75201e+06	0.0673451	-0.0122698	0.0185325	0.181731	-0.833947	14.2786	-17.369	425.197	81.3224	18.1348	58.7761	204.518	56.3887	204.518	60.5808	12.7426	26.5518	1307.32	22.4233	-25.5861	48.0094	14.2786	-8.12586
8044	-7.8901e+06	6.75201e+06	0.0782225	-0.019336	0.021547	0.177471	-0.919243	14.5852	-18.1084	401.305	71.8756	16.9716	55.0362	187.323	52.924	187.323	59.0404	12.9349	26.3074	1348.76	22.8769	-26.3041	49.1811	14.5852	-7.99054
8045	-7.7901e+06	6.75201e+06	0.0696527	-0.0169785	0.0174728	0.182776	-1.08978	14.7196	-18.8694	385.491	66.5525	16.0703	53.1185	176.155	50.4412	176.155	56.0567	12.3632	25.1008	1379.74	22.777	-26.474	49.251	14.7196	-8.43376
8046	-7.6901e+06	6.75201e+06	0.0454581	-0.0148537	0.012907	0.17139	-1.37019	14.3285	-18.8501	394.428	66.8923	16.7658	50.8477	175.966	53.9703	175.966	58.2854	12.1779	25.0854	1357.51	22.3148	-26.2119	48.5267	14.3285	-8.88333
8047	-7.5901e+06	6.75201e+06	0.0473601	-0.0176049	0.00939766	0.156346	-1.60024	14.1301	-18.8847	399.547	68.1776	16.8469	50.5919	176.78	53.8716	176.78	59.6473	12.8837	26.2161	1348.51	22.513	-26.5903	49.1032	14.1301	-8.98568
8048	-7.4901e+06	6.75201e+06	0.0507709	-0.0200602	0.0058918	0.141047	-1.26313	15.1239	-19.3821	384.651	65.7534	16.5604	49.8695	167.708	51.5551	167.708	57.4754	12.6606	25.0016	1405.81	23.4309	-27.2184	50.6493	15.1239	-9.34566
8049	-7.3901e+06	6.75201e+06	0.0386072	-0.0132333	0.00446174	0.144352	-1.46246	15.4276	-20.0005	397.345	68.9182	16.5164	50.8553	174.083	52.6357	174.083	57.0151	11.5464	22.6922	1442.13	23.2013	-27.654	50.8554	15.4276	-11.3177
8050	-7.2901e+06	6.75201e+06	0.060725	-0.0230512	0.0140334	0.156182	-2.03055	15.0746	-20.3898	418.838	74.2816	16.5965	53.6267	187.815	54.4703	187.761	57.0335	10.7001	21.2797	1443.73	22.4871	-27.7916	50.2787	15.0408	-12.8462
8051	-7.1901e+06	6.75201e+06	0.0513438	-0.00350321	0.00865093	0.171419	-2.99557	14.5199	-21.7679	423.613	72.7439	15.8693	53.0034	188.698	54.7836	188.486	56.0387	10.4128	20.4341	1477.45	21.8184	-29.1563	50.9748	14.4184	-17.8065
8052	-7.0901e+06	6.75201e+06	0.0924501	0.00173661	0.00256189	0.163931	-3.71911	14.2703	-23.0151	429.22	72.2568	15.1147	55.0407	193.312	52.5881	192.959	54.4838	10.6122	20.3496	1516.97	21.7941	-30.3795	52.1735	13.9604	-18.9819
8053	-6.9901e+06	6.75201e+06	0.116029	0.00184154	0.000393187	0.167135	-3.94961	14.0297	-22.9401	453.694	76.215	15.7881	55.772	204.672	53.8757	201.841	56.8151	10.7806	20.7603	1501.26	21.6753	-30.2451	51.9205	12.5187	-16.5768
8054	-6.8901e+06	6.75201e+06	0.0981444	0.00658469	-0.00535821	0.157957	-4.52204	13.4309	-23.3117	473.271	76.5198	16.2108	52.0445	205.016	58.2033	201.544	59.8956	10.3541	20.2147	1490.22	20.8168	-30.3795	51.1962	11.9834	-18.7107
8055	-6.7901e+06	6.75201e+06	0.0981444	0.00658469	-0.00535821	0.157957	-5.19102	13.2594	-24.3249	453.716	72.0493	13.9544	52.0101	192.92	53.7352	190.627	56.4766	10.5115	20.2058	1523.43	20.7185	-31.2943	52.0127	12.0473	-21.8932
8056	-6.6901e+06	6.75201e+06	0.115871	-0.00373504	-0.0116967	0.145723	-5.67966	13.0668	-25.0374	432.195	71.3507	12.3891	55.6561	189.928	46.6634	185.982	50.5435	10.5856	20.1937	1545.97	20.6854	-31.7333	52.4187	11.3592	-22.896
8057	-6.5901e+06	6.75201e+06	0.116571	-0.00344869	-0.011264	0.147862	-5.99383	12.7913	-25.3249	425.34	71.6849	12.1605	58.1599	194.14	43.6743	185.46	47.1687	10.3896	19.923	1548.36	20.5003	-31.6506	52.1509	11.1585	-23.3246
8058	-6.4901e+06	6.75201e+06	0.118512	-0.0171078	-0.000589181	0.149168	-6.35923	12.5029	-25.549	427.434	70.3007	12.6983	58.0744	196.944	44.2058	185.269	47.2796	10.221	19.6809	1547.34	20.3445	-31.5935	51.938	10.9641	-23.7077
8059	-6.3901e+06	6.75201e+06	0.0894222	-0.0426077	0.00412682	0.146793	-6.402	12.4889	-25.4544	419.948	68.7235	13.1694	56.9456	192.758	44.4745	179.311	47.9459	9.86492	19.0796	1545.54	20.3378	-31.3657	51.7035	11.0904	-23.8217
8060	-6.2901e+06	6.75201e+06	0.0947746	-0.0526967	-0.00202412	0.1306	-6.44697	12.1686	-25.3002	407.369	67.9932	13.2591	55.3747	184.253	44.6002	169.141	48.8222	9.1135	17.8411	1531.65	19.8769	-31.1947	51.0717	11.1577	-22.909
8061	-6.1901e+06	6.75201e+06	0.111872	-0.0594597	0.00363775	0.138424	-6.74008	11.3417	-25.3149	403.056	67.5721	12.6692	54.3818	179.667	43.9078	163.564	49.7843	8.62773	17.2139	1504.42	18.8366	-31.2802	50.1168	10.7814	-21.194
8071	-5.1901e+06	6.75201e+06	0.229496	-0.0693958	0.0885089	0.184137	-5.03825	9.06027	-21.0264	436.735	68.9473	13.2167	54.0218	186.92	42.6716	150.774	42.6942	5.40302	16.4759	1231.96	14.1171	-25.7726	39.8897	5.49385	-20.9402
8072	-5.0901e+06	6.75201e+06	0.229496	-0.0693958	0.0885089	0.184137	-5.38187	9.71587	-22.2289	456.389	69.054	15.822	51.1946	191.493	50.0374	155.782	50.1034	5.06385	12.7755	1303.23	14.862	-26.6649	41.527	5.80329	-21.9462
8073	-4.9901e+06	6.75201e+06	0.229496	-0.0693958	0.0885089	0.184137	-5.40886	9.81207	-22.0572	474.173	68.7728	18.4306	47.5008	193.749	58.0761	163.101	58.3913	4.737	11.5983	1298.02	14.7189	-26.1131	40.832	7.20389	-20.882
8074	-4.8901e+06	6.75201e+06	0.229496	-0.0693958	0.0885089	0.184137	-5.52784	9.76069	-21.9143	477.477	68.8837	19.6356	44.5163	191.752	63.4886	168.19	65.0065	4.74971	11.6512	1291.07	14.7628	-25.9537	40.7165	8.88513	-18.327
8075	-4.7901e+06	6.75201e+06	0.207737	-0.0656628	0.0761554	0.169219	-5.63805	9.61607	-21.9147	469.006	68.5295	19.9497	41.7611	185.884	67.0126	168.745	69.7456	4.92945	11.9914	1287.85	14.8463	-26.1736	41.02	9.13153	-17.1436
8076	-4.6901e+06	6.75201e+06	0.149496	-0.0447681	0.0822851	0.211921	-5.56994	9.57427	-21.8374	459.551	67.396	19.8287	39.3589	179.114	68.8755	166.147	73.7077	5.30037	12.7234	1285.41	15.0919	-26.3925	41.4844	9.15833	-16.9796
8077	-4.5901e+06	6.75201e+06	0.149496	-0.0447681	0.0822851	0.211921	-5.34027	9.17223	-21.1028	464.977	66.1421	21.21	36.8081	176.644	72.0942	164.002	80.7133	6.4538	16.6151	1246.86	15.235	-26.346	41.581	8.88739	-16.2581
8078	-4.4901e+06	6.75201e+06	0.149496	-0.0447681	0.0822851	0.211921	NA	NA	NA	NA	NA	NA	NA	NA	NA	NA	NA	NA	NA	NA	NA	NA	NA	NA	NA
8079	-4.3901e+06	6.75201e+06	0.0962238	-0.0245629	0.0794296	0.218389	-5.56663	8.15697	-19.8436	577.644	77.3868	29.8148	37.1104	224.281	94.3454	201.929	99.2603	7.61698	20.4985	1153.44	14.6233	-25.5309	40.1542	7.82489	-12.6836
8080	-4.2901e+06	6.75201e+06	0.0459668	-0.0383282	0.091282	0.184341	-6.30806	7.34936	-20.0095	656.206	85.8153	33.0712	35.1576	247.167	104.09	226.542	119.041	7.1918	18.9515	1116.81	13.6033	-25.5526	39.156	6.8723	-10.5415
8081	-4.1901e+06	6.75201e+06	0.0459668	-0.0383282	0.091282	0.184341	-5.16194	6.8233	-17.4516	679.097	84.8353	33.6797	30.7728	240.338	106.13	228.977	134.474	6.49322	20.0756	989.032	12.3265	-22.5063	34.8328	6.57358	-8.67773
8119	-390096	6.75201e+06	-0.088949	-0.0738929	0.0176937	0.110585	NA	NA	NA	NA	NA	NA	NA	NA	NA	NA	NA	NA	NA	NA	NA	NA	NA	NA	NA
8120	-290096	6.75201e+06	-0.088949	-0.0738929	0.0176937	0.110585	NA	NA	NA	NA	NA	NA	NA	NA	NA	NA	NA	NA	NA	NA	NA	NA	NA	NA	NA
8121	-190096	6.75201e+06	-0.088949	-0.0738929	0.0176937	0.110585	7.68968	11.9177	4.04038	1065.18	124.857	54.8181	27.8385	355.892	175.233	236.639	296.346	5.17383	37.0299	328.563	15.4661	1.52348	13.9426	6.56006	9.4399
8127	409904	6.75201e+06	-0.00907118	-0.0560536	0.0306638	0.153044	5.41969	12.4882	-0.917983	1934.37	241.609	83.4679	34.8861	696.113	275.141	371.597	563.383	5.45721	26.9298	558.502	16.5174	-3.79451	20.3119	3.5124	7.50101
8128	509904	6.75201e+06	0.0175503	-0.0592998	0.0221049	0.153585	4.55027	12.8986	-2.94041	1502.59	185.866	67.4217	31.6553	529.558	235.902	309.889	409.08	6.2906	26.145	651.197	17.8226	-6.09634	23.9189	3.8787	5.73701
8129	609904	6.75201e+06	-0.0452599	-0.057717	0.0208246	0.136305	6.04105	15.0891	-2.2914	1089.14	136.747	55.3023	29.3813	385.686	188.918	260.872	242.587	6.63767	25.7264	707.833	20.3051	-5.38913	25.6943	6.43206	4.39049
8130	709904	6.75201e+06	-0.0729471	-0.0631861	0.0233338	0.134286	NA	NA	NA	NA	NA	NA	NA	NA	NA	NA	NA	NA	NA	NA	NA	NA	NA	NA	NA
8131	809904	6.75201e+06	-0.0565985	-0.0710525	0.0115343	0.126485	6.2471	15.013	-1.82001	794.07	90.1215	43.918	24.0195	259.347	141.95	207.999	180.865	7.30412	27.8052	687.34	20.6875	-5.55225	26.2397	7.43159	2.55328
8132	909904	6.75201e+06	-0.0915361	-0.0651265	0.0031242	0.109416	6.32698	15.2363	-1.72669	649.284	72.5157	33.2291	24.9352	208.192	111.473	194.676	131.737	7.30914	27.7318	693.781	20.9495	-5.39233	26.3418	12.6451	0.814434
8133	1.0099e+06	6.75201e+06	-0.0848499	-0.0616691	0.0131406	0.116797	6.1287	15.3499	-2.19404	621.961	73.178	31.1014	26.5158	204.077	105.923	197.987	126.744	7.73316	28.3774	716.083	21.4105	-5.82811	27.2386	14.2557	0.168101
8134	1.1099e+06	6.75201e+06	-0.113279	-0.0736462	0.0161346	0.117813	6.34568	15.6464	-1.98852	578.046	69.3737	29.4469	27.1832	192.187	99.225	183.414	119.511	7.70289	28.0793	718.424	21.6045	-5.77412	27.3787	14.3617	0.581684
8135	1.2099e+06	6.75201e+06	-0.117201	-0.0699998	0.0125337	0.109247	6.48481	15.4288	-1.2767	554.997	63.3735	28.0286	26.4477	177.385	95.5148	166.167	114.894	6.56555	25.7045	686.36	20.6488	-4.83458	25.4834	12.0595	1.56215
8137	1.4099e+06	6.75201e+06	0.0217312	-0.104832	-0.0297739	0.102062	NA	NA	NA	NA	NA	NA	NA	NA	NA	NA	NA	NA	NA	NA	NA	NA	NA	NA	NA
8138	1.5099e+06	6.75201e+06	-0.0431783	-0.0589157	0.00616184	0.119997	6.50249	16.0803	-2.20479	606.32	72.7745	30.3406	33.1015	211.587	94.8639	171.079	106.882	5.80589	21.6655	754.153	21.0601	-5.67651	26.7366	9.12951	0.498666
8139	1.6099e+06	6.75201e+06	-0.0436244	-0.0594585	0.00185648	0.110256	5.89376	16.0997	-3.68018	657.843	76.5167	31.3437	32.3834	222.337	100.033	200.514	130.689	6.95696	23.4981	811.029	21.9154	-7.65406	29.5695	13.1368	-0.490316
8140	1.7099e+06	6.75201e+06	-0.0537827	-0.0644984	-0.000614752	0.107027	5.28146	15.8409	-4.77968	663.063	81.7684	31.4905	32.8026	229.356	99.1621	218.411	126.367	7.8127	25.0011	840.749	22.4438	-8.79079	31.2346	14.2108	-1.09965
8141	1.8099e+06	6.75201e+06	-0.0332244	-0.0668657	-0.00170863	0.108573	5.16686	15.9315	-5.19281	624.65	79.5682	28.4953	34.5647	225.979	92.524	219.681	108.871	7.62142	24.0918	859.152	22.2085	-9.42785	31.6364	14.8039	-1.82415
8142	1.9099e+06	6.75201e+06	-0.0247827	-0.0696299	-0.0162434	0.0960133	4.88318	15.7444	-5.76171	678.029	83.7537	32.4778	31.0148	237.865	107.039	232.281	125.381	7.66719	23.6456	872.139	21.5661	-10.869	32.4351	14.2687	-1.22744
8143	2.0099e+06	6.75201e+06	-0.0573283	-0.0690928	-0.00863811	0.0954133	4.5086	15.652	-6.57508	650.605	80.1525	30.7791	30.938	228.663	104.511	226.439	118.919	8.12636	24.504	901.645	21.9233	-11.2546	33.1779	14.3905	-1.78381
8144	2.1099e+06	6.75201e+06	-0.0377456	-0.072564	-0.00676551	0.0933593	4.0676	15.643	-7.6783	636.741	76.4637	28.6851	30.5838	219.805	101.291	218.782	116.142	8.28948	24.0078	949.445	21.9914	-12.5425	34.5339	14.9926	-3.01193
8145	2.2099e+06	6.75201e+06	-0.0137712	-0.0740544	-0.0130852	0.0935506	3.65916	15.484	-8.30932	689.801	83.5828	31.1699	29.6581	235.435	109.372	234.853	129.006	8.31744	23.5938	969.753	21.9436	-13.3165	35.26	14.9401	-3.09654
8146	2.3099e+06	6.75201e+06	-0.00350339	-0.0728954	-0.0137572	0.0965124	3.48771	15.5073	-8.81538	657.152	83.4547	31.0077	31.1206	232.409	103.488	232.392	121.878	8.26901	23.0226	986.479	22.1115	-13.8087	35.9202	15.4829	-3.2025
8147	2.4099e+06	6.75201e+06	0.00486783	-0.0705168	-0.0197728	0.0988708	3.34658	15.5632	-9.07049	628.388	80.885	29.1642	31.901	224.545	95.6915	224.545	115.103	8.48408	23.3626	996.213	22.3019	-14.0113	36.3132	15.5632	-5.12485
8148	2.5099e+06	6.75201e+06	-0.0167603	-0.0609591	-0.0267209	0.102463	3.32365	15.7804	-9.06909	615.211	79.0715	28.6636	32.1278	222.235	93.5755	222.235	114.017	8.10663	22.3375	1007.19	22.2658	-14.0156	36.2814	15.7804	-5.30414
8149	2.6099e+06	6.75201e+06	-0.0069815	-0.052731	-0.0105128	0.111749	3.13565	15.6519	-9.42565	599.961	79.0898	27.2398	34.1168	222.73	90.9042	222.73	109.5	8.00944	22.0628	1015.13	21.988	-14.3001	36.2881	15.6519	-4.52355
8150	2.7099e+06	6.75201e+06	0.0145861	-0.0669742	-0.0329856	0.10018	2.96664	15.6452	-9.80005	603.092	77.44	27.9892	32.3527	218.121	93.6069	218.121	110.343	8.50205	22.8447	1029.55	22.342	-14.8683	37.2103	15.6452	-4.64201
8151	2.8099e+06	6.75201e+06	0.0211933	-0.0667893	-0.032416	0.109379	2.86584	15.7423	-10.1846	612.285	76.3717	28.7149	30.9704	213.284	95.575	213.284	111.377	8.64548	22.778	1049.08	22.7327	-15.2202	37.9529	15.7423	-5.0979
8152	2.9099e+06	6.75201e+06	0.00719312	-0.0743191	-0.0260994	0.103761	2.81998	15.7227	-10.2954	606.008	78.0355	26.6866	33.56	217.67	90.6347	217.67	107.233	8.57436	22.4961	1051.46	22.7862	-15.3262	38.1124	15.7227	-4.61252
8153	3.0099e+06	6.75201e+06	-0.0038692	-0.07066	-0.0261777	0.103645	2.59471	15.6777	-10.6723	604.119	78.5557	26.1651	33.9516	219.512	88.6079	219.512	108.041	8.68459	22.4463	1065.28	22.6743	-16.0243	38.6986	15.6777	-3.61859
8154	3.1099e+06	6.75201e+06	-0.0145159	-0.0611326	-0.0270723	0.114113	2.20771	15.7514	-11.6022	592.241	79.6743	24.9346	35.7572	216.141	83.9111	216.141	100.845	8.54119	21.3903	1106.14	22.6155	-17.3313	39.9468	15.7514	-5.29214
8155	3.2099e+06	6.75201e+06	-0.00331028	-0.0595653	-0.028132	0.117829	2.18281	15.8468	-11.735	607.267	84.9917	26.3904	35.8417	218.299	85.7877	218.238	105.174	8.32	20.8023	1116.2	22.6579	-17.3274	39.9854	15.7455	-5.04477
8156	3.3099e+06	6.75201e+06	-0.00830865	-0.0704327	-0.0215127	0.123145	2.27603	15.9839	-11.6339	608.945	83.0262	26.7798	34.6128	215.396	87.5446	215.325	107.52	8.16443	20.5465	1118.03	22.7839	-16.9361	39.72	15.8617	-4.28907
8157	3.4099e+06	6.75201e+06	-0.0199514	-0.0654242	-0.0251936	0.125605	1.89989	15.7377	-12.1451	602.201	79.6915	27.0011	32.8625	209.31	90.581	208.973	107.192	8.80281	21.6475	1128.78	22.8839	-17.7712	40.6551	15.4146	-4.64599
8158	3.5099e+06	6.75201e+06	-0.0316655	-0.0528146	-0.0202683	0.134874	1.45463	15.3489	-12.6287	598.609	74.9631	27.6662	29.9452	205.438	94.6006	204.903	112.684	8.95703	21.986	1132.29	22.5459	-18.1927	40.7386	14.8865	-5.10271
8159	3.6099e+06	6.75201e+06	-0.0316655	-0.0528146	-0.0202683	0.134874	1.52699	15.6274	-12.8073	562.546	75.6301	24.3962	35.3318	207.12	82.7401	207.071	98.4804	8.5897	21.1628	1150.18	22.5897	-17.9925	40.5822	15.5592	-4.86362
8160	3.7099e+06	6.75201e+06	-0.0299165	-0.0436192	-0.0144771	0.162102	1.47059	15.8742	-13.2038	613.11	79.4218	26.0004	35.0713	221.879	87.3841	220.853	108.262	8.03722	19.7505	1177.3	22.5742	-18.1235	40.6978	15.0913	-4.51225
8161	3.8099e+06	6.75201e+06	-0.00594148	-0.0526737	-0.0115653	0.156526	0.676631	15.1815	-14.1556	726.382	92.9386	30.7177	34.0055	261.36	107.997	253.277	127.776	8.31652	19.9494	1186.33	22.2177	-19.4526	41.6703	12.9685	-6.61548
8162	3.9099e+06	6.75201e+06	-0.0141711	-0.0566721	-0.013803	0.142142	0.25759	14.6715	-14.5578	722.842	99.8958	30.0988	38.2832	272.045	104.958	266.043	122.761	8.85641	21.0398	1179.74	21.9527	-20.1237	42.0764	13.2382	-9.17955
8163	4.0099e+06	6.75201e+06	0.00707379	-0.0650324	-0.0109023	0.13852	1.09813	15.5107	-13.9495	563.459	92.5301	19.8394	51.4876	243.423	68.6957	243.137	79.527	9.43994	22.1052	1188.57	22.8844	-19.8238	42.7082	15.379	-10.7235
8164	4.1099e+06	6.75201e+06	0.0177851	-0.0636815	-0.0115278	0.142438	1.50943	16.3868	-13.7379	513.789	87.3714	16.0677	55.4648	231.697	57.6644	231.693	66.9765	9.09267	20.9674	1215.09	23.4764	-19.8934	43.3698	16.3774	-11.1731
8165	4.2099e+06	6.75201e+06	0.00751006	-0.0598016	-0.0110391	0.144914	1.27801	16.4347	-14.4928	510.284	83.1463	16.3244	52.1624	222.292	59.9949	222.22	70.5893	9.36376	21.1843	1245.56	23.7124	-20.4701	44.1825	16.2683	-11.7033
8166	4.3099e+06	6.75201e+06	-0.00321057	-0.0612638	-0.0104107	0.14086	0.767714	16.5098	-16.0427	501.712	81.2556	16.6606	50.2692	214.183	60.4019	214.165	71.7002	10.3014	22.2612	1307.97	24.4094	-21.8419	46.2513	16.4676	-12.6787
8167	4.4099e+06	6.75201e+06	-0.015505	-0.0577488	-0.0100262	0.142881	0.422791	16.3833	-16.5163	495.367	80.7995	16.9307	49.5767	211.061	59.5584	211.06	71.7534	10.6325	22.7174	1324.34	24.4021	-22.4023	46.8044	16.3832	-11.3882
8168	4.5099e+06	6.75201e+06	-0.00481931	-0.0561759	-0.0106601	0.147071	0.294401	16.3683	-16.5128	492.271	78.849	16.9508	49.7298	210.965	58.4896	210.965	70.5796	9.83532	21.2662	1325.84	23.7717	-22.4816	46.2533	16.3683	-10.1499
8169	4.6099e+06	6.75201e+06	0.0271873	-0.063529	-0.00867662	0.145918	0.096651	15.9779	-16.4904	483.078	75.8347	16.3254	50.1635	208.957	56.755	208.957	66.1944	9.85711	21.4502	1307.26	23.5093	-22.4288	45.9381	15.9779	-13.6764
8170	4.7099e+06	6.75201e+06	0.0266771	-0.0740477	-0.0135926	0.137704	-0.219769	15.6777	-16.7193	480.944	73.7655	16.0251	49.4981	207.719	56.3128	207.719	65.662	10.5125	22.5758	1305.89	23.8878	-22.6605	46.5483	15.6777	-14.1184
8171	4.8099e+06	6.75201e+06	0.0207605	-0.0791034	-0.0117423	0.13073	-0.425509	15.6197	-16.9973	498.084	75.2275	16.6214	48.3144	212.146	58.4724	212.146	69.935	10.9882	23.23	1315.2	24.2085	-23.085	47.2935	15.6197	-14.425
8172	4.9099e+06	6.75201e+06	0.00930495	-0.0751266	-0.0111992	0.133223	-0.624897	15.5776	-17.3762	518.907	79.1623	17.6625	47.2818	218.719	62.0835	218.719	75.7467	10.8418	22.8141	1325.36	24.0396	-23.4781	47.5176	15.5776	-14.1754
8173	5.0099e+06	6.75201e+06	0.00142164	-0.0702113	-0.0180728	0.135416	-0.770676	15.5745	-17.6754	528.31	83.4822	17.9927	47.6605	224.543	63.7526	224.543	79.0421	10.3943	21.8411	1334.3	23.8392	-23.7486	47.5878	15.5745	-10.6704
8174	5.1099e+06	6.75201e+06	-0.0171905	-0.0662741	-0.0196328	0.14545	-0.627193	15.8468	-17.5674	527.918	84.1717	17.3691	48.0669	224.896	62.6735	224.896	78.9023	10.1302	21.2799	1342.19	24.0914	-23.5149	47.6063	15.8468	-10.151
8175	5.2099e+06	6.75201e+06	-0.0302925	-0.060629	-0.0236517	0.148755	-0.600665	16.0908	-17.6295	520.252	79.2642	16.0279	47.6665	218.498	60.1892	218.498	76.2252	10.2288	21.2929	1357.23	24.3311	-23.7136	48.0447	16.0908	-12.9991
8176	5.3099e+06	6.75201e+06	-0.0441028	-0.0546788	-0.0278879	0.152239	-0.810515	16.0433	-17.9221	515.735	75.1146	15.2781	47.0573	213.025	58.7895	213.025	74.7681	10.1167	21.0431	1366.68	24.1427	-23.939	48.0818	16.0433	-14.4644
8177	5.4099e+06	6.75201e+06	-0.0441028	-0.0546788	-0.0278879	0.152239	-1.15044	15.8451	-18.5131	521.836	74.4211	16.1539	45.4831	210.607	60.7242	210.607	76.464	10.1067	20.8488	1378.06	24.0211	-24.4576	48.4787	15.8451	-15.7144
8178	5.5099e+06	6.75201e+06	-0.0329895	-0.0603064	-0.0239696	0.140306	-1.32459	15.8871	-18.7821	531.224	74.3469	17.7827	43.1978	208.8	64.1263	208.8	80.3196	10.1961	20.8093	1390.72	24.2431	-24.7596	49.0027	15.8871	-14.1938
8179	5.6099e+06	6.75201e+06	-0.00900079	-0.0645586	-0.0216757	0.137789	-1.37172	15.9927	-18.9089	530.992	72.371	18.896	41.0579	203.864	65.8823	203.864	83.0991	9.81499	20.0804	1399.12	24.1678	-24.6981	48.8659	15.9927	-11.6432
8180	5.7099e+06	6.75201e+06	-0.00900079	-0.0645586	-0.0216757	0.137789	-1.51106	15.9046	-19.0334	528.51	72.3855	18.7226	40.6886	201.757	65.2131	201.757	84.5705	10.0666	20.4622	1402.54	24.3227	-24.8625	49.1852	15.9046	-10.3382
8181	5.8099e+06	6.75201e+06	-0.00900079	-0.0645586	-0.0216757	0.137789	-1.4427	15.8829	-18.7948	526.633	73.4328	18.3179	41.218	201.691	64.4418	201.691	84.439	10.2445	20.7837	1394.21	24.5239	-24.7791	49.303	15.8829	-9.67781
8182	5.9099e+06	6.75201e+06	-0.00894533	-0.0712299	-0.0170344	0.130613	-1.31934	15.9849	-18.6941	521.238	73.0735	18.0813	41.0109	199.039	64.5052	199.039	82.0257	10.3602	20.81	1395.58	24.8596	-24.954	49.8136	15.9849	-12.5688
8183	6.0099e+06	6.75201e+06	-0.0202805	-0.0725624	-0.016208	0.126514	-1.56199	15.682	-19.0487	510.956	72.41	17.7146	40.3783	192.675	63.0844	192.675	79.7728	10.5781	20.989	1400.97	24.844	-25.59	50.4339	15.682	-15.4546
8184	6.1099e+06	6.75201e+06	-0.00889492	-0.0772948	-0.012815	0.12409	-2.26097	15.1273	-20.0548	499.833	71.2167	17.7351	39.5321	186.222	62.5827	186.222	78.4752	10.7866	21.1896	1416.92	24.1882	-26.7157	50.9039	15.1273	-16.879
8185	6.2099e+06	6.75201e+06	0.00733349	-0.0803249	-0.011721	0.116075	-3.07129	14.6615	-21.4315	481.667	68.7935	17.2308	39.7393	180.848	60.2476	180.843	74.8027	10.817	20.9967	1448.44	23.6119	-27.8994	51.5114	14.6505	-18.4456
8186	6.3099e+06	6.75201e+06	0.00618064	-0.0791519	-0.00325098	0.119009	-3.24589	14.7221	-22.1832	450.067	64.6461	16.4	40.2148	171.198	56.8206	171.113	69.432	10.7137	20.5443	1478.46	23.5952	-28.5476	52.1428	14.5319	-18.9642
8187	6.4099e+06	6.75201e+06	0.017602	-0.0780297	-0.00374528	0.122752	-3.09659	15.2597	-22.539	416.515	61.3423	14.9848	42.0458	162.159	52.0539	161.959	62.8071	10.9553	20.616	1516.32	24.162	-28.9948	53.1568	14.7959	-19.2365
8188	6.5099e+06	6.75201e+06	0.0116006	-0.0746661	0.00150967	0.126303	-2.95426	16.211	-23.3616	382.525	59.5379	13.1447	45.8384	155.709	45.6247	155.632	54.952	10.9155	19.9524	1591.71	25.1809	-29.6254	54.8062	16.0154	-20.0507
8189	6.6099e+06	6.75201e+06	0.0236949	-0.0733837	0.00110519	0.130398	-3.12261	16.3883	-23.818	360.52	59.5925	11.2974	50.3617	154.667	39.5744	154.666	48.4797	11.2636	20.1227	1618.25	25.3897	-30.6039	55.9937	16.3856	-20.5635
8190	6.7099e+06	6.75201e+06	0.0245209	-0.0747727	-0.00805704	0.126994	-3.25375	15.8232	-23.3576	359.442	59.0832	10.8438	51.0567	155.979	38.3224	155.979	47.4276	12.0545	21.3936	1576.68	24.8085	-31.5393	56.3478	15.8232	-20.1466
8191	6.8099e+06	6.75201e+06	0.0245209	-0.0747727	-0.00805704	0.126994	-3.62198	15.1965	-23.392	376.12	58.702	11.809	48.7662	160.522	41.2864	160.522	50.7212	12.6604	22.6385	1552.42	24.4641	-31.385	55.8492	15.1965	-20.1912
8192	6.9099e+06	6.75201e+06	0.0429805	-0.0744586	-0.00762331	0.138672	-4.89481	14.243	-24.8458	407.137	63.3798	13.0166	48.2619	172.904	45.1692	172.904	55.1423	13.7194	24.0214	1572.34	24.0598	-32.9817	57.0415	14.243	-21.8322
8193	7.0099e+06	6.75201e+06	0.0460104	-0.081197	0.00218654	0.143521	-5.75553	13.7406	-25.8921	422.114	67.6462	13.2829	50.4796	182.597	46.0429	182.597	56.3761	14.4203	24.6721	1596.22	23.8025	-34.6376	58.4401	13.7406	-23.1049
8194	7.1099e+06	6.75201e+06	0.0507691	-0.0922392	0.011343	0.148346	-5.63285	14.069	-25.9495	400.783	66.0751	12.0218	53.7877	178.784	41.7395	178.784	52.5085	14.0464	24.1655	1614.54	23.7595	-34.36	58.1195	14.069	-23.1398
8195	7.2099e+06	6.75201e+06	0.0475395	-0.0850449	0.00104686	0.143249	-5.44194	14.3706	-25.9398	384.696	64.5799	10.8397	56.06	175.328	38.6883	175.328	49.6381	13.2688	23.0882	1626.99	23.6885	-33.7815	57.47	14.3706	-22.6279
8196	7.3099e+06	6.75201e+06	0.0475395	-0.0850449	0.00104686	0.143249	-5.134	14.6531	-25.9258	389.702	64.0634	10.6157	54.6983	174.466	39.659	174.466	52.3811	12.7266	22.2657	1637.83	24.0506	-33.1058	57.1565	14.6531	-20.2897
8197	7.4099e+06	6.75201e+06	0.0475395	-0.0850449	0.00104686	0.143249	-5.13012	14.5265	-25.8124	419.098	67.5694	11.4459	53.2357	184.561	42.4988	184.561	58.8944	12.1926	21.62	1628.67	23.944	-32.4119	56.3559	14.5265	-16.7971
8198	7.5099e+06	6.75201e+06	0.0584077	-0.0740728	0.00551622	0.153941	-5.97591	13.652	-25.7133	464.62	78.0787	12.8317	58.2668	216.359	45.5383	216.359	60.0454	11.1429	20.3518	1587.4	22.8179	-31.8717	54.6896	13.652	-16.9479
8199	7.6099e+06	6.75201e+06	0.0457009	-0.0691292	0.00667871	0.15763	-6.81774	13.089	-26.3914	467.351	88.6756	11.5803	69.6874	239.505	40.4252	239.505	49.7237	11.0152	20.2217	1595.7	22.196	-32.277	54.473	13.089	-19.7719
8200	7.7099e+06	6.75201e+06	0.0730075	-0.0600604	0.00139311	0.15757	-6.51827	13.414	-26.4318	414.981	89.5324	7.92885	82.0904	232.754	28.1374	232.754	32.8048	11.8728	21.4284	1615.08	22.6076	-32.8063	55.4139	13.414	-22.6575
8201	7.8099e+06	6.75201e+06	0.122717	-0.0739187	0.00732649	0.149431	-6.527	13.5908	-26.9537	377.474	84.5816	5.93625	86.6136	219.379	21.5417	219.379	23.7887	12.5	21.9915	1645.66	22.8202	-34.0358	56.856	13.5908	-23.5932
8202	7.9099e+06	6.75201e+06	0.122717	-0.0739187	0.00732649	0.149431	-6.65833	14.1026	-28.1805	362.146	76.8163	6.04857	83.251	205.138	21.84	205.138	24.8977	12.8156	21.7673	1719.82	23.3199	-35.5803	58.9003	14.1026	-24.0896
8203	8.0099e+06	6.75201e+06	0.128371	-0.0814117	0.0186846	0.155141	-7.13497	14.2552	-29.4646	378.603	74.6139	7.58627	76.4368	203.161	27.3824	203.161	31.7367	13.0288	21.5663	1781.68	23.6852	-36.7371	60.4223	14.2552	-24.7618
8204	8.1099e+06	6.75201e+06	0.146746	-0.080026	0.0186901	0.161047	-7.42189	14.1936	-29.8475	420.569	77.9917	9.76238	70.5612	214.481	34.8469	214.481	39.8595	12.5717	20.8767	1796.28	23.6268	-36.5542	60.181	14.1936	-25.5066
8205	8.2099e+06	6.75201e+06	0.127394	-0.0818723	0.0207372	0.171983	-7.37293	14.0743	-29.2841	484.295	83.941	12.7533	64.9803	235.261	44.7958	235.261	49.2361	11.4807	19.623	1768.92	23.0908	-35.3765	58.4674	14.0743	-25.3605
8206	8.3099e+06	6.75201e+06	0.125328	-0.083425	0.00820363	0.166288	-7.21349	14.1939	-29.0906	520.408	85.9246	14.4836	62.2354	245.334	50.2085	245.334	55.3288	11.5451	19.6808	1766.84	23.0542	-35.3765	58.4307	14.1939	-25.2613
8207	8.4099e+06	6.75201e+06	0.102087	-0.0719381	0.00553685	0.175455	-8.59249	13.2782	-30.8911	501.229	86.0145	12.4421	67.7488	248.128	44.1502	248.128	48.1969	12.7695	21.0768	1805.25	22.4909	-37.7362	60.2271	13.2782	-27.1325
8208	8.5099e+06	6.75201e+06	0.10749	-0.0722073	0.0129641	0.17759	-9.1555	13.3764	-32.6341	444.467	80.328	9.58967	71.6844	229.151	35.5128	229.151	39.5922	13.8863	22.067	1882.82	22.9298	-39.9047	62.8345	13.3764	-28.0689
8209	8.6099e+06	6.75201e+06	0.0708933	-0.0756206	0.0132995	0.16406	-8.47638	14.382	-32.5594	417.373	75.4473	8.89832	69.9016	211.341	33.6084	211.341	39.4363	13.7913	21.6893	1923.2	23.9391	-39.6662	63.6053	14.382	-25.8843
8210	8.7099e+06	6.75201e+06	0.103692	-0.0799232	0.0151067	0.150165	-8.36334	14.7251	-32.6984	407.986	73.876	8.5462	69.0446	203.569	32.3825	203.569	39.236	13.1723	20.7561	1946.44	24.2068	-39.3082	63.515	14.725	-25.1423
8211	8.8099e+06	6.75201e+06	0.103692	-0.0799232	0.0151067	0.150165	-8.90566	14.4251	-33.6929	399.571	72.1638	8.04859	68.8048	197.295	30.4575	197.247	35.2963	13.0347	20.3593	1978.84	23.9592	-40.1077	64.0669	14.3412	-28.555
8212	8.9099e+06	6.75201e+06	0.0874745	-0.0812368	0.0151984	0.144873	-8.86113	14.7019	-34.1422	393.163	70.4099	8.23182	68.0585	191.94	30.2159	191.336	34.4681	12.589	19.4965	2010.6	24.1557	-40.4522	64.6078	13.9816	-28.8847
8213	9.0099e+06	6.75201e+06	0.0830147	-0.0831271	0.0186314	0.152795	-9.04442	14.3043	-33.9989	408.285	73.6732	8.94065	68.6437	200.62	31.6428	197.77	35.6603	11.9583	18.7801	1987.65	23.5411	-40.132	63.673	12.0889	-28.7368
8214	9.1099e+06	6.75201e+06	0.0570994	-0.0755928	0.020633	0.161589	-9.07716	13.244	-32.675	449.52	82.1734	10.0244	69.5254	225.192	34.8172	216.39	39.2121	11.3004	18.6421	1888.91	21.9464	-38.6794	60.6257	10.6889	-27.815
8215	9.2099e+06	6.75201e+06	0.0609182	-0.0695416	0.0167083	0.173423	-8.4766	12.0121	-29.7647	503.127	91.5808	10.8043	69.4947	254.773	38.2952	236.011	43.1959	10.4506	18.9139	1717.44	19.7686	-35.5428	55.3113	10.1164	-25.6612
8216	9.3099e+06	6.75201e+06	0.0525437	-0.0769998	0.013781	0.162341	-7.32293	11.126	-26.1237	535.251	93.7418	11.4147	66.8648	266.025	41.1142	240.766	46.3937	9.38566	19.0061	1530.75	17.8973	-31.494	49.3914	10.0267	-22.7828
8217	9.4099e+06	6.75201e+06	0.0584039	-0.0745859	0.00551122	0.154295	-5.71186	10.9954	-22.7415	532.439	88.6917	11.4608	63.4621	256.765	42.0229	232.094	48.2771	8.48209	18.9055	1391.16	17.2067	-27.6344	44.8411	10.5945	-19.9238
8219	9.6099e+06	6.75201e+06	0.0548406	-0.075804	0.00811042	0.174997	NA	NA	NA	NA	NA	NA	NA	NA	NA	NA	NA	NA	NA	NA	NA	NA	NA	NA	NA
8223	1.00099e+07	6.75201e+06	0.0390685	-0.0682121	0.00348171	0.180744	NA	NA	NA	NA	NA	NA	NA	NA	NA	NA	NA	NA	NA	NA	NA	NA	NA	NA	NA
8224	1.01099e+07	6.75201e+06	0.0390685	-0.0682121	0.00348171	0.180744	NA	NA	NA	NA	NA	NA	NA	NA	NA	NA	NA	NA	NA	NA	NA	NA	NA	NA	NA
8225	1.02099e+07	6.75201e+06	0.0390685	-0.0682121	0.00348171	0.180744	NA	NA	NA	NA	NA	NA	NA	NA	NA	NA	NA	NA	NA	NA	NA	NA	NA	NA	NA
8228	1.05099e+07	6.75201e+06	0.0426525	-0.036835	-0.0204185	0.212561	NA	NA	NA	NA	NA	NA	NA	NA	NA	NA	NA	NA	NA	NA	NA	NA	NA	NA	NA
8229	1.06099e+07	6.75201e+06	0.078365	-0.047875	-0.00621812	0.193504	-2.85083	10.2273	-15.5761	545.071	76.0983	21.7538	39.4916	193.531	74.7503	181.412	111.003	8.11807	22.0024	1072.48	15.7509	-21.162	36.9129	6.41725	-7.7779
8230	1.07099e+07	6.75201e+06	0.0883725	-0.0457307	0.00819753	0.187635	-3.23051	10.0123	-15.7136	601.736	79.7998	26.7504	33.4686	206.072	91.9424	191	131.872	8.1524	22.0362	1071.81	15.8822	-21.1029	36.9851	6.34142	-7.37042
8231	1.08099e+07	6.75201e+06	0.0883725	-0.0457307	0.00819753	0.187635	-2.678	10.2222	-14.7132	633.314	80.6769	30.0987	28.9129	211.412	104.243	188.798	148.992	7.78373	21.8577	1042.77	15.8452	-19.7525	35.5977	6.78251	-5.78324
8232	1.09099e+07	6.75201e+06	0.0535302	-0.0345042	-0.00474929	0.206182	-2.09128	10.2439	-13.2651	631.414	80.9851	32.0099	29.5348	216.539	106.803	186.513	145.176	7.14496	21.7163	992.439	15.2549	-17.6622	32.917	6.50791	-4.4837
8376	-1.07901e+07	6.65201e+06	0.141506	-0.0644684	0.0194924	0.185607	NA	NA	NA	NA	NA	NA	NA	NA	NA	NA	NA	NA	NA	NA	NA	NA	NA	NA	NA
8377	-1.06901e+07	6.65201e+06	0.144833	-0.0737673	0.023006	0.161617	2.38479	10.5644	-4.88781	600.323	80.406	28.3825	34.2008	225.53	97.5874	188.376	110.603	6.82372	28.7972	649.748	14.9945	-8.7037	23.6982	7.727	-3.97653
8378	-1.05901e+07	6.65201e+06	0.159234	-0.0807835	0.0206304	0.156072	2.63261	10.8812	-4.76904	711.804	92.36	36.6129	31.8436	255.318	123.837	205.854	141.115	6.99125	28.9929	656.33	15.441	-8.70156	24.1426	7.69258	-2.73508
8379	-1.04901e+07	6.65201e+06	0.159234	-0.0807835	0.0206304	0.156072	NA	NA	NA	NA	NA	NA	NA	NA	NA	NA	NA	NA	NA	NA	NA	NA	NA	NA	NA
8380	-1.03901e+07	6.65201e+06	0.159958	-0.0755724	0.0135886	0.155017	2.75698	10.0999	-3.24484	1348.31	153.6	78.0389	22.054	422.478	265.04	327.967	323.16	6.61456	30.4085	564.463	14.5106	-7.35766	21.8683	5.15792	4.68247
8393	-9.0901e+06	6.65201e+06	0.0605393	-0.0266524	-0.0150181	0.133349	4.2583	11.3995	-2.1422	2402.31	365.084	113.426	38.1578	904.395	364.156	428.859	650.696	6.13949	28.7313	563.081	15.8169	-5.53703	21.3539	4.35988	7.73475
8394	-8.9901e+06	6.65201e+06	0.101898	-0.0441017	-0.0178235	0.130589	0.673103	8.48388	-6.53722	1824.62	256.991	85.7526	35.286	657.681	275.387	346.458	514.663	7.31069	30.3468	626.785	13.6338	-10.4931	24.1269	-0.551735	3.69558
8395	-8.8901e+06	6.65201e+06	0.126407	-0.0575329	-0.0031784	0.137568	-0.809926	8.76983	-9.72122	1065.55	133.121	41.8542	32.3734	359.28	158.215	231.081	309.122	9.04974	30.5143	764.51	15.2036	-14.4254	29.629	-1.04129	1.54172
8396	-8.7901e+06	6.65201e+06	0.135358	-0.0328463	-0.0126033	0.141393	-1.28024	9.42349	-11.639	684.126	81.6768	22.2834	31.6942	227	99.7365	191.751	178.159	10.541	31.0738	865.24	16.6274	-17.3041	33.9316	5.98908	-3.30329
8397	-8.6901e+06	6.65201e+06	0.135358	-0.0328463	-0.0126033	0.141393	-2.08131	9.28614	-13.3193	618.743	74.9299	19.7448	32.1225	211.297	87.9602	199.178	146.356	10.87	29.9627	925.844	16.5912	-19.7107	36.302	8.24317	-7.03751
8398	-8.5901e+06	6.65201e+06	0.161497	-0.0367309	-0.00346486	0.165742	-2.40081	9.44859	-14.2014	598.494	78.4392	19.3365	33.678	210.525	83.8996	207.791	136.327	10.8484	28.6646	968.24	16.6767	-21.1871	37.8638	8.94899	-7.71029
8399	-8.4901e+06	6.65201e+06	0.161497	-0.0367309	-0.00346486	0.165742	-2.4154	9.52927	-14.1143	605.822	91.7379	21.2901	41.0396	238.591	83.1277	238.503	118.731	10.7952	28.5522	973.157	16.5725	-21.2648	37.8373	9.50076	-7.83994
8400	-8.3901e+06	6.65201e+06	0.146157	-0.0394163	-0.00082892	0.160675	-2.10768	9.73006	-13.2848	627.507	111.951	23.6206	55.7997	287.904	81.9004	287.904	92.8959	10.8367	29.3603	957.666	16.7175	-20.2192	36.9367	9.73006	-8.85694
8401	-8.2901e+06	6.65201e+06	0.141233	-0.0328136	0.0090743	0.170117	-0.32744	12.5645	-13.6627	536.436	105.429	20.5377	63.7475	265.752	66.2548	265.752	68.2512	11.2394	27.6855	1086.63	19.7819	-20.9272	40.7091	12.5645	-10.2594
8402	-8.1901e+06	6.65201e+06	0.122622	-0.0376372	0.0192039	0.157124	-0.276914	13.5095	-15.3438	465.139	90.4481	20.0794	60.0036	225.117	62.9554	225.117	65.4194	11.7576	26.6675	1190.62	21.0422	-23.0909	44.1331	13.5095	-8.60552
8403	-8.0901e+06	6.65201e+06	0.0683213	-0.0142905	0.0168505	0.172078	-0.484547	13.4769	-15.7814	447.558	84.2471	19.6921	57.558	212.621	61.5451	212.621	67.159	12.49	27.6433	1208.82	21.3137	-23.9231	45.2367	13.4769	-6.99398
8404	-7.9901e+06	6.65201e+06	0.0574695	-0.00727748	0.0137917	0.176084	-0.326674	13.9332	-16.1514	438.516	77.7703	18.5501	53.2805	200.729	58.7123	200.729	69.271	12.7799	27.6037	1241.28	21.9204	-24.4056	46.3261	13.9332	-6.92441
8405	-7.8901e+06	6.65201e+06	0.0432688	-0.0103864	0.0139123	0.170398	-0.232708	14.3647	-16.638	421.595	73.4097	17.4919	52.2864	191.152	55.1376	191.152	65.6798	12.4422	26.703	1271.77	22.2214	-24.4157	46.6371	14.3647	-6.94003
8406	-7.7901e+06	6.65201e+06	0.0454581	-0.0148537	0.012907	0.17139	-0.288137	14.5261	-16.9156	422.203	75.63	17.6653	54.0111	193.847	55.9562	193.847	63.1157	12.4513	26.5492	1283.49	22.3777	-24.5621	46.9398	14.5261	-7.16643
8407	-7.6901e+06	6.65201e+06	0.0454581	-0.0148537	0.012907	0.17139	-0.612178	14.4613	-17.4601	421.776	76.786	17.0481	55.4416	195.391	55.2124	195.391	62.3876	12.8504	26.7134	1301.49	22.5283	-25.5842	48.1125	14.4613	-7.60963
8408	-7.5901e+06	6.65201e+06	0.0454581	-0.0148537	0.012907	0.17139	-0.822704	14.5674	-17.9296	421.467	76.348	16.707	55.8622	195.762	54.4215	195.762	61.9434	12.3533	25.492	1325.13	22.4575	-25.9842	48.4417	14.5674	-8.18173
8409	-7.4901e+06	6.65201e+06	0.0507709	-0.0200602	0.0058918	0.141047	-0.805082	15.2292	-18.4193	432.831	79.254	17.538	56.7919	202.555	54.924	202.555	59.5348	11.42	23.3457	1370.43	22.7891	-26.1101	48.8992	15.2292	-10.2575
8410	-7.3901e+06	6.65201e+06	0.0259764	-0.00558886	0.000786772	0.14791	-1.47959	15.001	-19.1943	456.943	85.4052	17.5925	58.6322	216.101	55.8173	216.101	58.698	10.6206	21.7333	1391.65	22.2555	-26.6074	48.8629	15.001	-13.721
8411	-7.2901e+06	6.65201e+06	0.0220738	-0.00324905	0.0039934	0.157202	-2.326	14.6151	-20.4523	467.613	86.8552	16.7427	58.8387	219.941	54.9069	219.941	57.3142	10.4981	21.1575	1425.64	21.8337	-27.7944	49.6281	14.6151	-17.2266
8412	-7.1901e+06	6.65201e+06	0.0548667	0.00456543	0.00265283	0.168288	-2.86572	14.274	-21.2045	481.158	87.3557	17.0623	58.7213	224.251	56.1598	224.247	58.9333	10.8012	21.4965	1440.49	21.6184	-28.6417	50.2602	14.2686	-17.0187
8413	-7.0901e+06	6.65201e+06	0.0921827	0.0134578	0.00112734	0.180903	-3.23245	14.0976	-21.6696	510.731	91.3094	19.0373	57.8355	234.535	60.8106	234.074	65.5385	11.0651	21.8215	1450.75	21.5134	-29.1996	50.713	13.6955	-13.2622
8414	-6.9901e+06	6.65201e+06	0.0937638	0.00961817	7.96286e-05	0.179216	-3.6653	13.6554	-22.2488	520.333	86.605	19.2037	52.44	226.967	65.2498	225.999	68.7121	10.665	21.0881	1456.55	20.9297	-29.6233	50.5529	13.1055	-15.0473
8415	-6.8901e+06	6.65201e+06	0.0937638	0.00961817	7.96286e-05	0.179216	-4.20152	13.4619	-23.2204	487.661	76.3806	16.3879	50.9794	206.797	59.1652	206.393	63.2317	10.7444	20.8874	1488.29	20.876	-30.5336	51.4096	13.2849	-17.6324
8416	-6.7901e+06	6.65201e+06	0.0937638	0.00961817	7.96286e-05	0.179216	-4.64168	13.6134	-24.0729	468.305	77.4962	15.1178	54.9733	205.292	52.8767	204.658	56.8277	11.0217	21.0501	1528.53	21.2937	-31.062	52.3557	12.9532	-21.1527
8417	-6.6901e+06	6.65201e+06	0.0776367	0.0020559	-0.00405804	0.152902	-4.9872	13.298	-24.3596	467.198	79.1619	14.9549	56.7189	209.557	50.6548	206.549	53.6803	10.9241	21.0105	1529.48	21.1169	-30.8727	51.9896	11.8343	-22.2104
8418	-6.5901e+06	6.65201e+06	0.091848	-0.00261403	0.00179963	0.146199	-5.30525	13.0677	-24.5236	466.663	76.9522	14.8223	56.339	209.772	49.7503	203.851	53.2881	10.8497	20.9648	1526.65	20.9956	-30.7558	51.7514	11.5013	-22.3928
8419	-6.4901e+06	6.65201e+06	0.105065	-0.00973683	0.0066849	0.140998	-5.59345	12.8862	-24.7459	457.986	73.5294	15.0674	55.0931	205.149	50.2722	196.999	54.0302	10.5325	20.3502	1529.14	20.8509	-30.9065	51.7574	11.4051	-22.7649
8420	-6.3901e+06	6.65201e+06	0.105065	-0.00973683	0.0066849	0.140998	-5.71967	12.8675	-24.9431	428.937	69.5606	13.9896	53.8092	190.575	48.349	182.388	52.6624	9.91775	19.0663	1539.39	20.8318	-31.1905	52.0224	11.6097	-22.9749
8421	-6.2901e+06	6.65201e+06	0.108677	-0.0137007	0.0018219	0.128596	-5.96227	12.4397	-25.158	413.077	68.6472	12.1165	53.5196	183.163	45.7759	173.692	54.1033	9.26134	17.8671	1534.71	20.2943	-31.5343	51.8286	11.5201	-20.5365
8422	-6.1901e+06	6.65201e+06	0.108677	-0.0137007	0.0018219	0.128596	NA	NA	NA	NA	NA	NA	NA	NA	NA	NA	NA	NA	NA	NA	NA	NA	NA	NA	NA
8432	-5.1901e+06	6.65201e+06	0.235442	-0.0526354	0.0827797	0.212084	-4.56766	9.98603	-21.0702	512.962	79.2119	17.7265	52.0655	216.434	55.4136	179.933	56.6047	5.08393	13.0216	1267.67	14.8175	-25.8616	40.6791	6.68283	-18.6988
8433	-5.0901e+06	6.65201e+06	0.250032	-0.0583624	0.0761854	0.199997	-4.84482	10.2992	-21.5922	524.741	77.8615	19.8274	48.9928	217.478	61.7886	183.333	63.2027	5.13582	12.3802	1300	15.2362	-26.2222	41.4584	8.38149	-18.1388
8434	-4.9901e+06	6.65201e+06	0.166095	-0.0500516	0.0766563	0.201568	-5.0237	10.4342	-21.6508	531.81	76.9939	21.4966	45.3889	216.348	68.7085	189.369	70.6888	5.45561	12.9785	1307	15.6299	-26.3295	41.9593	9.5547	-17.2278
8435	-4.8901e+06	6.65201e+06	0.166095	-0.0500516	0.0766563	0.201568	-5.2373	10.3962	-21.8215	529.826	77.2878	22.5149	42.9921	213.522	74.1512	192.798	76.5725	6.03651	14.0103	1315.41	16.0601	-26.9049	42.965	9.57243	-16.7877
8436	-4.7901e+06	6.65201e+06	0.178184	-0.0396031	0.0658441	0.190238	-5.3879	10.2483	-21.994	523.965	77.1204	23.3613	41.3493	210.191	77.8007	193.741	81.3166	6.90085	15.5246	1321.31	16.5009	-27.7034	44.2043	9.48103	-16.7862
8437	-4.6901e+06	6.65201e+06	0.162952	-0.0340736	0.0706899	0.199558	-5.46447	10.0528	-22.185	527.66	76.3188	24.4223	39.4768	209.17	80.2472	194.079	88.7736	8.13413	17.7588	1324.77	16.9423	-28.6093	45.5517	9.41486	-16.6434
8438	-4.5901e+06	6.65201e+06	0.162952	-0.0340736	0.0706899	0.199558	-5.49037	9.94765	-22.0616	547.518	75.0071	26.9335	37.4421	212.49	85.4272	195.82	97.5388	8.81913	19.2433	1314.3	17.1358	-28.7302	45.866	9.31605	-16.4072
8439	-4.4901e+06	6.65201e+06	0.162952	-0.0340736	0.0706899	0.199558	-5.55275	9.38245	-21.1833	574.876	77.6342	29.6587	37.9582	225.267	92.6413	203.9	100.34	8.49775	20.0476	1254.96	16.2922	-27.5112	43.8033	8.7677	-15.6229
8440	-4.3901e+06	6.65201e+06	0.107119	-0.0242334	0.0678861	0.206896	-6.1663	8.45012	-20.8536	645.912	86.0753	33.2894	36.1421	245.584	104.66	227.781	115.658	8.07946	19.1934	1203.13	15.2756	-26.9338	42.2094	7.89111	-11.7399
8441	-4.2901e+06	6.65201e+06	0.0850868	-0.0130056	0.0751759	0.208697	-5.45878	8.22132	-19.1833	721.303	90.3404	36.6985	29.4519	248.497	117.407	239.798	146.704	7.56784	19.1795	1122.94	14.566	-24.9211	39.4871	7.52095	-9.04225
8442	-4.1901e+06	6.65201e+06	0.0707819	-0.029836	0.0866628	0.20533	-3.52083	7.51552	-15.0324	771.517	87.5415	39.8302	23.3009	239.004	131.805	232.014	176.552	6.54595	24.7812	922.554	12.7455	-20.0495	32.795	4.77963	-6.70699
8480	-390096	6.65201e+06	-0.0699143	-0.0629806	-0.000485121	0.10816	7.72505	12.3984	3.61925	1994.97	237.735	92.2186	32.9429	693.306	301.473	365.424	599.955	5.67027	37.3496	366.614	16.0561	0.936665	15.1194	5.19167	8.80194
8481	-290096	6.65201e+06	-0.0876829	-0.0657117	0.00030584	0.101751	7.00672	12.0988	2.49093	1544.23	180.173	79.406	26.8207	516.279	254.272	293.163	460.926	6.65961	39.0961	398.601	16.465	-0.564128	17.0291	4.00465	8.34527
8482	-190096	6.65201e+06	-0.0876829	-0.0657117	0.00030584	0.101751	7.41306	12.7411	2.68225	855.568	92.5303	53.1325	18.3539	261.942	168.257	192.055	229.456	6.93059	38.4918	415.183	17.4567	-0.556759	18.0135	6.23411	7.34916
8483	-90095.7	6.65201e+06	-0.0876829	-0.0657117	0.00030584	0.101751	NA	NA	NA	NA	NA	NA	NA	NA	NA	NA	NA	NA	NA	NA	NA	NA	NA	NA	NA
8488	409904	6.65201e+06	-0.00945538	-0.0578343	0.0217235	0.155625	NA	NA	NA	NA	NA	NA	NA	NA	NA	NA	NA	NA	NA	NA	NA	NA	NA	NA	NA
8489	509904	6.65201e+06	-0.00945538	-0.0578343	0.0217235	0.155625	NA	NA	NA	NA	NA	NA	NA	NA	NA	NA	NA	NA	NA	NA	NA	NA	NA	NA	NA
8490	609904	6.65201e+06	-0.0115875	-0.03599	-0.00304406	0.169656	NA	NA	NA	NA	NA	NA	NA	NA	NA	NA	NA	NA	NA	NA	NA	NA	NA	NA	NA
8491	709904	6.65201e+06	-0.0762237	-0.0483281	-0.000171794	0.140948	NA	NA	NA	NA	NA	NA	NA	NA	NA	NA	NA	NA	NA	NA	NA	NA	NA	NA	NA
8492	809904	6.65201e+06	-0.109906	-0.0683667	0.0197436	0.11926	6.88773	15.2113	-0.749972	826.257	89.4847	45.9666	22.5548	260.171	148.859	212.947	202.447	6.79787	27.775	654.115	20.3302	-4.09627	24.4265	7.40623	3.44875
8493	909904	6.65201e+06	-0.120076	-0.0699498	0.0197108	0.114921	6.04933	14.6384	-1.77307	815.773	88.8793	44.5305	22.3049	253.085	146.031	220.961	193.943	7.73775	29.7625	670.793	20.6173	-5.36208	25.9793	8.68492	2.08173
8494	1.0099e+06	6.65201e+06	-0.109906	-0.0683667	0.0197436	0.11926	5.85539	14.7216	-2.15098	656.102	74.8097	34.8297	23.5763	207.795	115.821	198.982	141.239	8.01933	29.8879	689.339	21.016	-5.80565	26.8217	13.1097	0.42073
8495	1.1099e+06	6.65201e+06	-0.120076	-0.0699498	0.0197108	0.114921	6.4674	15.4702	-1.509	589.376	68.5879	32.3803	23.9602	189.466	105.236	182.353	128.116	8.18682	30.0756	693.264	21.7808	-5.39775	27.1786	14.4957	1.56208
8496	1.2099e+06	6.65201e+06	-0.27283	-0.111352	-0.020442	-0.00529881	NA	NA	NA	NA	NA	NA	NA	NA	NA	NA	NA	NA	NA	NA	NA	NA	NA	NA	NA
8497	1.3099e+06	6.65201e+06	-0.306576	-0.0958967	-0.0148623	0.000591437	NA	NA	NA	NA	NA	NA	NA	NA	NA	NA	NA	NA	NA	NA	NA	NA	NA	NA	NA
8499	1.5099e+06	6.65201e+06	-0.0463191	-0.0590474	0.00443605	0.114349	6.60596	15.9772	-2.04881	636.782	75.1757	28.8568	32.0702	216.671	97.8527	192.81	119.249	6.1873	23.2065	741.405	20.944	-5.66654	26.6106	11.162	0.448843
8500	1.6099e+06	6.65201e+06	-0.057811	-0.0561952	0.000678097	0.103628	NA	NA	NA	NA	NA	NA	NA	NA	NA	NA	NA	NA	NA	NA	NA	NA	NA	NA	NA
8501	1.7099e+06	6.65201e+06	-0.0620775	-0.0469215	-0.00670681	0.101936	5.24258	15.7395	-5.05404	674.032	81.3731	29.0723	32.15	234.106	100.227	221.959	122.086	7.33765	24.2468	847.347	21.577	-8.66829	30.2453	14.4335	-2.30786
8502	1.8099e+06	6.65201e+06	-0.036862	-0.0670253	-0.00343815	0.10051	5.33067	15.8122	-4.92175	658.489	81.485	30.7759	31.432	229.746	101.479	227.407	120.206	7.7211	25.2967	842.508	21.7485	-8.78009	30.5285	15.1127	-1.2506
8503	1.9099e+06	6.65201e+06	-0.0274845	-0.0657702	-0.00388582	0.103493	5.22257	15.9777	-5.39896	653.9	81.7631	32.1755	31.0444	230.461	103.542	229.612	121.096	7.62728	24.177	868.832	21.7718	-9.80212	31.5739	15.5198	-1.0799
8504	2.0099e+06	6.65201e+06	-0.0498456	-0.0685496	-0.00982583	0.0953206	5.0145	15.9239	-5.87172	668.669	81.2992	33.7814	29.1392	232.885	110.306	232.18	127.246	8.01684	24.6678	885.488	21.8714	-10.6386	32.51	15.4259	-1.0192
8505	2.1099e+06	6.65201e+06	-0.0294905	-0.0717217	-0.00743859	0.096685	4.81759	16.1866	-6.68322	635.972	79.7807	30.0392	31.4423	226.4	101.602	226.359	114.313	8.25842	24.5739	932.97	22.3471	-11.2904	33.6375	16.1225	-2.47506
8506	2.2099e+06	6.65201e+06	-0.0232629	-0.0748022	-0.0119747	0.0941002	4.31834	16.2647	-7.76717	672.658	85.6825	30.8473	32.2263	239.39	102.302	239.38	116.979	8.05966	23.0657	985.631	22.252	-12.7075	34.9595	16.2479	-3.17643
8507	2.3099e+06	6.65201e+06	-0.00937654	-0.0807068	-0.0105685	0.0899032	4.10836	15.8575	-7.6619	652.684	86.3887	30.0343	33.7358	238.018	98.0221	238.018	116.867	7.93914	23.3124	955.777	22.1018	-11.9602	34.0619	15.8567	-2.11222
8508	2.4099e+06	6.65201e+06	-0.0140293	-0.068376	-0.0169494	0.0981792	3.88081	15.7526	-8.14669	630.839	84.6465	29.0468	33.249	228.057	95.0433	228.057	113.745	8.25472	23.6968	969.192	22.1562	-12.6857	34.8418	15.7526	-3.64242
[truncated: 12,994 more rows]
